# Supplementary material for: Pan-Genus Analysis and Typing of Antimicrobial Resistance Plasmids in Acinetobacter
Source: Research Square preprint supplement (doi:10.21203/rs.3.rs-6165751/v1), 2025-05-12
Supplement: Supplementary file 1 [file 94b86c43b15731f1b55fb796.xlsx]

## Sheet: Sheet1
Table S1. Plasmid sequences exlcuded
RefSeq Accession Numbers	Reason For Exclusion
CP101886	Duplicate from Previous APT Study
CP042557	Duplicate from Previous APT Study
CP048828	Duplicate from Previous APT Study
CP050433	Duplicate from Previous APT Study
CP072123	Duplicate from Previous APT Study
CP072271	Duplicate from Previous APT Study
CP072296	Duplicate from Previous APT Study
CP072286	Duplicate from Previous APT Study
CP072276	Duplicate from Previous APT Study
CP072291	Duplicate from Previous APT Study
CP072301	Duplicate from Previous APT Study
CP072399	Duplicate from Previous APT Study
CP072281	Duplicate from Previous APT Study
CP021344	Duplicate from Previous APT Study
CP050386	Duplicate from Previous APT Study
CP048135	Duplicate from Previous APT Study
MF399199	Duplicate from Previous APT Study
CP046899	Duplicate from Previous APT Study
CP040260	Duplicate from Previous APT Study
KU744946	Duplicate from Previous APT Study
CP098522	Duplicate from Previous APT Study
CP020596	Duplicate from Previous APT Study
AP014650	Duplicate from Previous APT Study
CP040051	Duplicate from Previous APT Study
MK531536	Duplicate from Previous APT Study
MK323043	Duplicate from Previous APT Study
CP059301	Duplicate from Previous APT Study
CP022285	Duplicate from Previous APT Study
CP012007	Duplicate from Previous APT Study
CP084298	Duplicate from Previous APT Study
CP050426	Duplicate from Previous APT Study
CP050416	Duplicate from Previous APT Study
MK531540	Duplicate from Previous APT Study
LT605060	Duplicate from Previous APT Study
CP012005	Duplicate from Previous APT Study
CP027531	Duplicate from Previous APT Study
CP077802	Duplicate from Previous APT Study
CP041590	Duplicate from Previous APT Study
CP098796	Duplicate from Previous APT Study
CP098792	Duplicate from Previous APT Study
CP038259	Duplicate from Previous APT Study
CP098797	Duplicate from Previous APT Study
CP028139	Duplicate from Previous APT Study
KT779035	Duplicate from Previous APT Study
CP048851	Duplicate from Previous APT Study
CP026129	Duplicate from Previous APT Study
CP038263	Duplicate from Previous APT Study
CP036284	Duplicate from Previous APT Study
CP039519	Duplicate from Previous APT Study
AFDL01000008	Duplicate from Previous APT Study
MG954377	Duplicate from Previous APT Study
ALAL01000013	Duplicate from Previous APT Study
AFDK01000004	Duplicate from Previous APT Study
CP017649	Duplicate from Previous APT Study
CP061706	Duplicate from Previous APT Study
CP059543	Duplicate from Previous APT Study
CP091598	Duplicate from Previous APT Study
CP038645	Duplicate from Previous APT Study
CP027483	Duplicate from Previous APT Study
CP010398	Duplicate from Previous APT Study
AP022239	Duplicate from Previous APT Study
AYOI01000002	Duplicate from Previous APT Study
CP026705	Duplicate from Previous APT Study
CP027122	Duplicate from Previous APT Study
CP072527	Duplicate from Previous APT Study
CP059475	Duplicate from Previous APT Study
CP023025	Duplicate from Previous APT Study
CP059387	Duplicate from Previous APT Study
CP062920	Duplicate from Previous APT Study
CP018333	Duplicate from Previous APT Study
CP078100	Duplicate from Previous APT Study
CP031445	Duplicate from Previous APT Study
CP010780	Duplicate from Previous APT Study
CP096723	Duplicate from Previous APT Study
CP096746	Duplicate from Previous APT Study
CP096697	Duplicate from Previous APT Study
CP021327	Duplicate from Previous APT Study
CP096721	Duplicate from Previous APT Study
CP096748	Duplicate from Previous APT Study
CP046537	Duplicate from Previous APT Study
CP020585	Duplicate from Previous APT Study
CP040426	Duplicate from Previous APT Study
CM008330	Duplicate from Previous APT Study
CP026945	Duplicate from Previous APT Study
AYFW01000101	Duplicate from Previous APT Study
CP082888	Duplicate from Previous APT Study
CP096685	Duplicate from Previous APT Study
CP096699	Duplicate from Previous APT Study
CP096765	Duplicate from Previous APT Study
CP016296	Duplicate from Previous APT Study
CP082894	Duplicate from Previous APT Study
CP096737	Duplicate from Previous APT Study
CP096687	Duplicate from Previous APT Study
CP096728	Duplicate from Previous APT Study
AFDM01000010	Duplicate from Previous APT Study
CP016299	Duplicate from Previous APT Study
CP016301	Duplicate from Previous APT Study
CP024125	Duplicate from Previous APT Study
CM009049	Duplicate from Previous APT Study
CP050905	Duplicate from Previous APT Study
CP050908	Duplicate from Previous APT Study
MK386680	Duplicate from Previous APT Study
CP061515	Duplicate from Previous APT Study
CP061520	Duplicate from Previous APT Study
CP061524	Duplicate from Previous APT Study
CP075322	Duplicate from Previous APT Study
CP082891	Duplicate from Previous APT Study
CP094284	Duplicate from Previous APT Study
CP096709	Duplicate from Previous APT Study
CP096743	Duplicate from Previous APT Study
CP096732	Duplicate from Previous APT Study
CP096760	Duplicate from Previous APT Study
CP096711	Duplicate from Previous APT Study
CP096767	Duplicate from Previous APT Study
CP096752	Duplicate from Previous APT Study
CP077827	Duplicate from Previous APT Study
CP096770	Duplicate from Previous APT Study
CP096701	Duplicate from Previous APT Study
CP015484	Duplicate from Previous APT Study
CP061518	Duplicate from Previous APT Study
CP096726	Duplicate from Previous APT Study
CP018257	Duplicate from Previous APT Study
CP061522	Duplicate from Previous APT Study
CP026128	Duplicate from Previous APT Study
CP023028	Duplicate from Previous APT Study
CP034093	Duplicate from Previous APT Study
CP058730	Duplicate from Previous APT Study
CP059478	Duplicate from Previous APT Study
CP026944	Duplicate from Previous APT Study
CP029570	Duplicate from Previous APT Study
CP027608	Duplicate from Previous APT Study
CP035046	Duplicate from Previous APT Study
CP027185	Duplicate from Previous APT Study
CP027182	Duplicate from Previous APT Study
CP076805	Duplicate from Previous APT Study
CP083182	Duplicate from Previous APT Study
KU549175	Duplicate from Previous APT Study
CP047974	Duplicate from Previous APT Study
CP036285	Duplicate from Previous APT Study
CP017657	Duplicate from Previous APT Study
AFCZ02000003	Duplicate from Previous APT Study
CP047975	Duplicate from Previous APT Study
CP076818	Duplicate from Previous APT Study
CP050404	Duplicate from Previous APT Study
CP020594	Duplicate from Previous APT Study
CP033769	Duplicate from Previous APT Study
CP053219	Duplicate from Previous APT Study
CP072528	Duplicate from Previous APT Study
CP023030	Duplicate from Previous APT Study
KT852971	Duplicate from Previous APT Study
CP044357	Duplicate from Previous APT Study
CP050915	Duplicate from Previous APT Study
CP060995	Duplicate from Previous APT Study
CP073061	Duplicate from Previous APT Study
CP020580	Duplicate from Previous APT Study
CP020582	Duplicate from Previous APT Study
AP024803	Duplicate from Previous APT Study
CP051863	Duplicate from Previous APT Study
CP012008	Duplicate from Previous APT Study
CP072124	Duplicate from Previous APT Study
CP072297	Duplicate from Previous APT Study
CP072287	Duplicate from Previous APT Study
CP072400	Duplicate from Previous APT Study
CP072282	Duplicate from Previous APT Study
CP033753	Duplicate from Previous APT Study
CP021787	Duplicate from Previous APT Study
CP039931	Duplicate from Previous APT Study
CP030109	Duplicate from Previous APT Study
LN833432	Duplicate from Previous APT Study
CP077833	Duplicate from Previous APT Study
CP061516	Duplicate from Previous APT Study
CP008707	Duplicate from Previous APT Study
KY022424	Duplicate from Previous APT Study
CP041149	Duplicate from Previous APT Study
CP051867	Duplicate from Previous APT Study
CP017645	Duplicate from Previous APT Study
CP033245	Duplicate from Previous APT Study
CP015366	Duplicate from Previous APT Study
CP023033	Duplicate from Previous APT Study
CP032217	Duplicate from Previous APT Study
LT984690	Duplicate from Previous APT Study
CP024578	Duplicate from Previous APT Study
CP096695	Duplicate from Previous APT Study
CP038501	Duplicate from Previous APT Study
CP082228	Duplicate from Previous APT Study
CP082220	Duplicate from Previous APT Study
CP082895	Duplicate from Previous APT Study
CP082219	Duplicate from Previous APT Study
CP082221	Duplicate from Previous APT Study
CP082226	Duplicate from Previous APT Study
CP096730	Duplicate from Previous APT Study
CP096736	Duplicate from Previous APT Study
CP082889	Duplicate from Previous APT Study
CP096725	Duplicate from Previous APT Study
CP096769	Duplicate from Previous APT Study
CP082222	Duplicate from Previous APT Study
CP096708	Duplicate from Previous APT Study
CP096712	Duplicate from Previous APT Study
KM922672	Duplicate from Previous APT Study
CP082225	Duplicate from Previous APT Study
CP082892	Duplicate from Previous APT Study
CP096716	Duplicate from Previous APT Study
CP096751	Duplicate from Previous APT Study
CP018144	Duplicate from Previous APT Study
CP038264	Duplicate from Previous APT Study
CP069841	Duplicate from Previous APT Study
CP019115	Duplicate from Previous APT Study
KM977710	Duplicate from Previous APT Study
CP048134	Duplicate from Previous APT Study
CP008851	Duplicate from Previous APT Study
CP100306	Duplicate from Previous APT Study
CP014216	Duplicate from Previous APT Study
CP020593	Duplicate from Previous APT Study
CP020573	Duplicate from Previous APT Study
CP025267	Duplicate from Previous APT Study
MK386681	Duplicate from Previous APT Study
CP035047	Duplicate from Previous APT Study
CP016297	Duplicate from Previous APT Study
CP017647	Duplicate from Previous APT Study
CP077836	Duplicate from Previous APT Study
CP066236	Duplicate from Previous APT Study
CP066238	Duplicate from Previous APT Study
CP066233	Duplicate from Previous APT Study
CP066230	Duplicate from Previous APT Study
CP020577	Duplicate from Previous APT Study
CP096689	Duplicate from Previous APT Study
CP096739	Duplicate from Previous APT Study
CP016302	Duplicate from Previous APT Study
CP091595	Duplicate from Previous APT Study
AP023078	Duplicate from Previous APT Study
CP027180	Duplicate from Previous APT Study
CP026712	Duplicate from Previous APT Study
CP062921	Duplicate from Previous APT Study
CP077838	Duplicate from Previous APT Study
CP096763	Duplicate from Previous APT Study
CP026946	Duplicate from Previous APT Study
CP065052	Duplicate from Previous APT Study
CP026706	Duplicate from Previous APT Study
CP027121	Duplicate from Previous APT Study
CP020589	Duplicate from Previous APT Study
CP017655	Duplicate from Previous APT Study
CP096733	Duplicate from Previous APT Study
CP096744	Duplicate from Previous APT Study
CP096691	Duplicate from Previous APT Study
CP096706	Duplicate from Previous APT Study
CP029571	Duplicate from Previous APT Study
CP036286	Duplicate from Previous APT Study
CP039994	Duplicate from Previous APT Study
CP050909	Duplicate from Previous APT Study
CP050917	Duplicate from Previous APT Study
CP050912	Duplicate from Previous APT Study
CP094285	Duplicate from Previous APT Study
CP096756	Duplicate from Previous APT Study
CP096754	Duplicate from Previous APT Study
CP017651	Duplicate from Previous APT Study
CP017653	Duplicate from Previous APT Study
JAHPZP010000021	Duplicate from Previous APT Study
MG954379	Duplicate from Previous APT Study
CP027243	Duplicate from Previous APT Study
CP096719	Duplicate from Previous APT Study
CP077841	Duplicate from Previous APT Study
CP050392	Duplicate from Previous APT Study
CP027245	Duplicate from Previous APT Study
CP077847	Duplicate from Previous APT Study
CP096703	Duplicate from Previous APT Study
CP031382	Duplicate from Previous APT Study
CP050413	Duplicate from Previous APT Study
KR535992	Duplicate from Previous APT Study
CP084732	Duplicate from Previous APT Study
CP084735	Duplicate from Previous APT Study
CP084729	Duplicate from Previous APT Study
CP084723	Duplicate from Previous APT Study
CP084726	Duplicate from Previous APT Study
AFDL01000006	Duplicate from Previous APT Study
CP018422	Duplicate from Previous APT Study
CP072302	Duplicate from Previous APT Study
CP072277	Duplicate from Previous APT Study
CP072292	Duplicate from Previous APT Study
CP072272	Duplicate from Previous APT Study
CM009650	Duplicate from Previous APT Study
MK531538	Duplicate from Previous APT Study
CP051864	Duplicate from Previous APT Study
ALII01000020	Duplicate from Previous APT Study
KX230794	Duplicate from Previous APT Study
CM009084	Duplicate from Previous APT Study
CP042842	Duplicate from Previous APT Study
AFDB02000004	Duplicate from Previous APT Study
MK243454	Duplicate from Previous APT Study
CP044520	Duplicate from Previous APT Study
KF889012	Duplicate from Previous APT Study
CP076808	Duplicate from Previous APT Study
CP021322	Duplicate from Previous APT Study
HG977527	Duplicate from Previous APT Study
HG977523	Duplicate from Previous APT Study
CP053220	Duplicate from Previous APT Study
AEOY01000095	Duplicate from Previous APT Study
CP027184	Duplicate from Previous APT Study
CP042558	Duplicate from Previous APT Study
CP059476	Duplicate from Previous APT Study
CP038646	Duplicate from Previous APT Study
CP076815	Duplicate from Previous APT Study
CP053216	Duplicate from Previous APT Study
CP072306	Duplicate from Previous APT Study
CP039342	Duplicate from Previous APT Study
CP039932	Duplicate from Previous APT Study
CM016516	Duplicate from Previous APT Study
CP039344	Duplicate from Previous APT Study
MK386682	Duplicate from Previous APT Study
KX118105	Duplicate from Previous APT Study
KY216144	Duplicate from Previous APT Study
CP013925	Duplicate from Previous APT Study
CP050417	Duplicate from Previous APT Study
CP051876	Duplicate from Previous APT Study
CP051870	Duplicate from Previous APT Study
CP012956	Duplicate from Previous APT Study
CP038502	Duplicate from Previous APT Study
CP010399	Duplicate from Previous APT Study
CP096715	Duplicate from Previous APT Study
CP038265	Duplicate from Previous APT Study
CP026749	Duplicate from Previous APT Study
CP027532	Duplicate from Previous APT Study
AP023079	Duplicate from Previous APT Study
MT002974	Duplicate from Previous APT Study
CP027179	Duplicate from Previous APT Study
CP026127	Duplicate from Previous APT Study
CP077844	Duplicate from Previous APT Study
CP027186	Duplicate from Previous APT Study
MG100202	Duplicate from Previous APT Study
CP033872	Duplicate from Previous APT Study
CM009030	Duplicate from Previous APT Study
LR026973	Duplicate from Previous APT Study
CP096713	Duplicate from Previous APT Study
CP024419	Duplicate from Previous APT Study
LR026972	Duplicate from Previous APT Study
CP038503	Duplicate from Previous APT Study
CP032742	Duplicate from Previous APT Study
CP032218	Duplicate from Previous APT Study
CP034094	Duplicate from Previous APT Study
KY202458	Duplicate from Previous APT Study
KY202456	Duplicate from Previous APT Study
AEOZ01000236	Duplicate from Previous APT Study
AFDB02000003	Duplicate from Previous APT Study
CP038260	Duplicate from Previous APT Study
CM013137	Duplicate from Previous APT Study
KY202457	Duplicate from Previous APT Study
CP021348	Duplicate from Previous APT Study
CP021343	Duplicate from Previous APT Study
CP031381	Duplicate from Previous APT Study
CP040085	Duplicate from Previous APT Study
CP091329	Duplicate from Previous APT Study
CP096683	Duplicate from Previous APT Study
CP096694	Duplicate from Previous APT Study
AEOY01000096	Duplicate from Previous APT Study
CP096718	Duplicate from Previous APT Study
CP051865	Duplicate from Previous APT Study
MK323042	Duplicate from Previous APT Study
CP061707	Duplicate from Previous APT Study
CP066234	Duplicate from Previous APT Study
CP046900	Duplicate from Previous APT Study
CP061708	Duplicate from Previous APT Study
CP038261	Duplicate from Previous APT Study
CP050427	Duplicate from Previous APT Study
CP050418	Duplicate from Previous APT Study
MH362811	Duplicate from Previous APT Study
MH362813	Duplicate from Previous APT Study
CM008887	Duplicate from Previous APT Study
KY617771	Duplicate from Previous APT Study
CM004454	Duplicate from Previous APT Study
ALII01000019	Duplicate from Previous APT Study
CP018255	Duplicate from Previous APT Study
CP076816	Duplicate from Previous APT Study
CP076809	Duplicate from Previous APT Study
JACGEK010000080	Duplicate from Previous APT Study
CP059731	Duplicate from Previous APT Study
CP032220	Duplicate from Previous APT Study
MN266872	Duplicate from Previous APT Study
CP040049	Duplicate from Previous APT Study
CM009653	Duplicate from Previous APT Study
CM009651	Duplicate from Previous APT Study
CP050389	Duplicate from Previous APT Study
CP044358	Duplicate from Previous APT Study
CP027610	Duplicate from Previous APT Study
CP026339	Duplicate from Previous APT Study
CP061709	Duplicate from Previous APT Study
MN495626	Duplicate from Previous APT Study
MN495625	Duplicate from Previous APT Study
CP092030	Duplicate from Previous APT Study
CP092029	Duplicate from Previous APT Study
MH362812	Duplicate from Previous APT Study
MK431775	Duplicate from Previous APT Study
CP015486	Duplicate from Previous APT Study
CP024577	Duplicate from Previous APT Study
CP050405	Duplicate from Previous APT Study
CP040261	Duplicate from Previous APT Study
CP069842	Duplicate from Previous APT Study
CP033871	Duplicate from Previous APT Study
CP061526	Duplicate from Previous APT Study
CP062922	Duplicate from Previous APT Study
JADAJL010000301	Duplicate from Previous APT Study
JADAJJ010000299	Duplicate from Previous APT Study
MK531541	Duplicate from Previous APT Study
CP076819	Duplicate from Previous APT Study
MG954378	Duplicate from Previous APT Study
CP071920	Duplicate from Previous APT Study
CP015365	Duplicate from Previous APT Study
CP023032	Duplicate from Previous APT Study
CP060996	Duplicate from Previous APT Study
CM009046	Duplicate from Previous APT Study
CP033752	Duplicate from Previous APT Study
AP023080	Duplicate from Previous APT Study
CP035044	Duplicate from Previous APT Study
MG954376	Duplicate from Previous APT Study
AP024804	Duplicate from Previous APT Study
CM009647	Duplicate from Previous APT Study
CP044521	Duplicate from Previous APT Study
CP059303	Duplicate from Previous APT Study
AFDO01000021	Duplicate from Previous APT Study
CM009033	Duplicate from Previous APT Study
AFDB02000005	Duplicate from Previous APT Study
CP050406	Duplicate from Previous APT Study
CP022284	Duplicate from Previous APT Study
KU500415	Duplicate from Previous APT Study
KT022421	Duplicate from Previous APT Study
CP049315	Duplicate from Previous APT Study
CP035050	Duplicate from Previous APT Study
CP076822	Duplicate from Previous APT Study
CM009652	Duplicate from Previous APT Study
LR026974	Duplicate from Previous APT Study
ALII01000018	Duplicate from Previous APT Study
CP018334	Duplicate from Previous APT Study
CP066239	Duplicate from Previous APT Study
CP091597	Duplicate from Previous APT Study
CP026126	Duplicate from Previous APT Study
CP082893	Duplicate from Previous APT Study
CP076806	Duplicate from Previous APT Study
CP096741	Duplicate from Previous APT Study
CM012225	Duplicate from Previous APT Study
CP040088	Duplicate from Previous APT Study
CP040086	Duplicate from Previous APT Study
CP082890	Duplicate from Previous APT Study
CP054417	Duplicate from Previous APT Study
CP096758	Duplicate from Previous APT Study
CP096761	Duplicate from Previous APT Study
CP096750	Duplicate from Previous APT Study
CP077842	Duplicate from Previous APT Study
CP077845	Duplicate from Previous APT Study
CP077831	Duplicate from Previous APT Study
CM009036	Duplicate from Previous APT Study
CP090183	Duplicate from Previous APT Study
CP095092	Duplicate from Previous APT Study
KT346360	Duplicate from Previous APT Study
CP085789	Duplicate from Previous APT Study
CM009035	Duplicate from Previous APT Study
CP059544	Duplicate from Previous APT Study
CP035053	Duplicate from Previous APT Study
CP040427	Duplicate from Previous APT Study
CP041589	Duplicate from Previous APT Study
CP050434	Duplicate from Previous APT Study
KM051986	Duplicate from Previous APT Study
CP067103	Duplicate from Previous APT Study
CP035048	Duplicate from Previous APT Study
CM009924	Duplicate from Previous APT Study
CP031446	Duplicate from Previous APT Study
CP054561	Duplicate from Previous APT Study
AP024805	Duplicate from Previous APT Study
AP022240	Duplicate from Previous APT Study
CP051868	Duplicate from Previous APT Study
CP066017	Duplicate from Previous APT Study
CP039933	Duplicate from Previous APT Study
CP023027	Duplicate from Previous APT Study
CP098798	Duplicate from Previous APT Study
AYFI01000019	Duplicate from Previous APT Study
CP059304	Duplicate from Previous APT Study
CP023035	Duplicate from Previous APT Study
CP038647	Duplicate from Previous APT Study
CP098793	Duplicate from Previous APT Study
CP050435	Duplicate from Previous APT Study
KR535993	Duplicate from Previous APT Study
KX230793	Duplicate from Previous APT Study
CP053221	Duplicate from Previous APT Study
CP076820	Duplicate from Previous APT Study
CP045109	Duplicate from Previous APT Study
CP065886	Duplicate from Previous APT Study
CP015122	Duplicate from Previous APT Study
LT984691	Duplicate from Previous APT Study
CP059388	Duplicate from Previous APT Study
CP065433	Duplicate from Previous APT Study
CP010400	Duplicate from Previous APT Study
CP012955	Duplicate from Previous APT Study
CP038648	Duplicate from Previous APT Study
CP082953	Duplicate from Previous APT Study
CP076813	Duplicate from Previous APT Study
CP040083	Duplicate from Previous APT Study
CP047976	Duplicate from Previous APT Study
CP023021	Duplicate from Previous APT Study
CP029573	Duplicate from Previous APT Study
AP024806	Duplicate from Previous APT Study
CM009038	Duplicate from Previous APT Study
KJ534568	Duplicate from Previous APT Study
JAHPZP010000050	Duplicate from Previous APT Study
CP091466	Duplicate from Previous APT Study
CP006964	Duplicate from Previous APT Study
CP042559	Duplicate from Previous APT Study
CM003909	Duplicate from Previous APT Study
CP029572	Duplicate from Previous APT Study
AYEX01000118	Duplicate from Previous APT Study
MK386683	Duplicate from Previous APT Study
CP008850	Duplicate from Previous APT Study
CP050414	Duplicate from Previous APT Study
AFDN01000003	Duplicate from Previous APT Study
CP010782	Duplicate from Previous APT Study
CP008708	Duplicate from Previous APT Study
CM003314	Duplicate from Previous APT Study
CM003317	Duplicate from Previous APT Study
CP021786	Duplicate from Previous APT Study
CP026708	Duplicate from Previous APT Study
CP027529	Duplicate from Previous APT Study
CP027244	Duplicate from Previous APT Study
CP027609	Duplicate from Previous APT Study
CP027124	Duplicate from Previous APT Study
CP050906	Duplicate from Previous APT Study
CP050910	Duplicate from Previous APT Study
CP050918	Duplicate from Previous APT Study
CP050913	Duplicate from Previous APT Study
CM009043	Duplicate from Previous APT Study
CP050422	Duplicate from Previous APT Study
CP050411	Duplicate from Previous APT Study
CP050391	Duplicate from Previous APT Study
CP050393	Duplicate from Previous APT Study
CP050527	Duplicate from Previous APT Study
CP050402	Duplicate from Previous APT Study
CP051475	Duplicate from Previous APT Study
KU869528	Duplicate from Previous APT Study
CP056785	Duplicate from Previous APT Study
MK531537	Duplicate from Previous APT Study
CP060014	Duplicate from Previous APT Study
CP060012	Duplicate from Previous APT Study
CP066240	Duplicate from Previous APT Study
CP066231	Duplicate from Previous APT Study
CP069852	Duplicate from Previous APT Study
CP071765	Duplicate from Previous APT Study
CP048133	Duplicate from Previous APT Study
CP080456	Duplicate from Previous APT Study
CP084731	Duplicate from Previous APT Study
CP084734	Duplicate from Previous APT Study
CP084728	Duplicate from Previous APT Study
CP084722	Duplicate from Previous APT Study
CP084725	Duplicate from Previous APT Study
CP092486	Duplicate from Previous APT Study
CP094286	Duplicate from Previous APT Study
CP077839	Duplicate from Previous APT Study
CP077834	Duplicate from Previous APT Study
CP077848	Duplicate from Previous APT Study
CP100307	Duplicate from Previous APT Study
CP020576	Duplicate from Previous APT Study
CP050524	Duplicate from Previous APT Study
CP087595	Duplicate from Previous APT Study
CP033244	Duplicate from Previous APT Study
CP051877	Duplicate from Previous APT Study
CP051871	Duplicate from Previous APT Study
CP034097	Duplicate from Previous APT Study
KY704308	Duplicate from Previous APT Study
CP034095	Duplicate from Previous APT Study
CM009045	Duplicate from Previous APT Study
CP076810	Duplicate from Previous APT Study
CP051878	Duplicate from Previous APT Study
CP051872	Duplicate from Previous APT Study
AYFH01000048	Duplicate from Previous APT Study
HG977525	Duplicate from Previous APT Study
HG977529	Duplicate from Previous APT Study
LT594096	Duplicate from Previous APT Study
CP007713	Duplicate from Previous APT Study
CP018678	Duplicate from Previous APT Study
CP061710	Duplicate from Previous APT Study
MG520098	Duplicate from Previous APT Study
CP046901	Duplicate from Previous APT Study
AYFZ01000083	Duplicate from Previous APT Study
CP043954	Duplicate from Previous APT Study
LN865144	Duplicate from Previous APT Study
LN997847	Duplicate from Previous APT Study
CP058731	Duplicate from Previous APT Study
CP042560	Duplicate from Previous APT Study
CP050428	Duplicate from Previous APT Study
CP045108	Duplicate from Previous APT Study
CP050387	Duplicate from Previous APT Study
CP050429	Duplicate from Previous APT Study
CP050419	Duplicate from Previous APT Study
CP072125	Duplicate from Previous APT Study
CP072273	Duplicate from Previous APT Study
CP072298	Duplicate from Previous APT Study
CP072288	Duplicate from Previous APT Study
CP072278	Duplicate from Previous APT Study
CP072293	Duplicate from Previous APT Study
CP072303	Duplicate from Previous APT Study
CP072401	Duplicate from Previous APT Study
CP072283	Duplicate from Previous APT Study
CP038649	Duplicate from Previous APT Study
CP059545	Duplicate from Previous APT Study
CP033751	Duplicate from Previous APT Study
CP072529	Duplicate from Previous APT Study
CP023024	Duplicate from Previous APT Study
AP024807	Duplicate from Previous APT Study
JACGEK010000079	Duplicate from Previous APT Study
CP059730	Duplicate from Previous APT Study
CP085790	Duplicate from Previous APT Study
CP051476	Duplicate from Previous APT Study
CP038650	Duplicate from Previous APT Study
CP084299	Duplicate from Previous APT Study
CP076811	Duplicate from Previous APT Study
CP065888	Duplicate from Previous APT Study
CM009039	Duplicate from Previous APT Study
CP080455	Duplicate from Previous APT Study
CP061711	Duplicate from Previous APT Study
CP033870	Duplicate from Previous APT Study
CP065434	Duplicate from Previous APT Study
CP051873	Duplicate from Previous APT Study
CP072307	Duplicate from Previous APT Study
AFDL01000007	Duplicate from Previous APT Study
CP044518	Duplicate from Previous APT Study
CM003315	Duplicate from Previous APT Study
CM003319	Duplicate from Previous APT Study
CM003320	Duplicate from Previous APT Study
CP050408	Duplicate from Previous APT Study
AYFH01000057	Duplicate from Previous APT Study
CP023023	Duplicate from Previous APT Study
CP026340	Duplicate from Previous APT Study
CP062923	Duplicate from Previous APT Study
CP042561	Duplicate from Previous APT Study
CP059302	Duplicate from Previous APT Study
CM009029	Duplicate from Previous APT Study
AP024808	Duplicate from Previous APT Study
CP042562	Duplicate from Previous APT Study
CP012953	Duplicate from Previous APT Study
CP059390	Duplicate from Previous APT Study
CP042563	Duplicate from Previous APT Study
CP021785	Duplicate from Previous APT Study
CP061713	Duplicate from Previous APT Study
CM003742	Duplicate from Previous APT Study
AP024809	Duplicate from Previous APT Study
CP053217	Duplicate from Previous APT Study
AP024810	Duplicate from Previous APT Study
CP021346	Duplicate from Previous APT Study
CP034096	Duplicate from Previous APT Study
AP024811	Duplicate from Previous APT Study
CP051477	Duplicate from Previous APT Study
CP050394	Duplicate from Previous APT Study
CP042564	Duplicate from Previous APT Study
CP050430	Duplicate from Previous APT Study
CP050420	Duplicate from Previous APT Study
CP094287	Duplicate from Previous APT Study
CP021783	Duplicate from Previous APT Study
CM003316	Duplicate from Previous APT Study
CM009041	Duplicate from Previous APT Study
CM009683	Duplicate from Previous APT Study
CP080454	Duplicate from Previous APT Study
CP051879	Duplicate from Previous APT Study
CP051874	Duplicate from Previous APT Study
CP050529	Duplicate from Previous APT Study
CP050395	Duplicate from Previous APT Study
CP050409	Duplicate from Previous APT Study
AP024812	Duplicate from Previous APT Study
CP042565	Duplicate from Previous APT Study
CP050431	Duplicate from Previous APT Study
CP030107	Duplicate from Previous APT Study
CP030108	Duplicate from Previous APT Study
CM003313	Duplicate from Previous APT Study
CP021784	Duplicate from Previous APT Study
JADAIY010000264	Duplicate from Previous APT Study
MK386684	Duplicate from Previous APT Study
AP024813	Duplicate from Previous APT Study
AFDL01000005	Duplicate from Previous APT Study
CM009646	Duplicate from Previous APT Study
CP071764	Duplicate from Previous APT Study
CP048850	Duplicate from Previous APT Study
CP080453	Duplicate from Previous APT Study
CP008709	Duplicate from Previous APT Study
NZ_CP050525	Duplicate from Previous APT Study
NZ_KP890934	Duplicate from Previous APT Study
NZ_CP030084	Duplicate from Previous APT Study
NZ_CP032741	Duplicate from Previous APT Study
NZ_HG977528	Duplicate from Previous APT Study
NZ_AFCZ02000004	Duplicate from Previous APT Study
NZ_CP040081	Duplicate from Previous APT Study
NZ_CP020575	Duplicate from Previous APT Study
NZ_CP040082	Duplicate from Previous APT Study
NZ_CP018862	Duplicate from Previous APT Study
NZ_CP032216	Duplicate from Previous APT Study
NZ_CP032219	Duplicate from Previous APT Study
NZ_CP019218	Duplicate from Previous APT Study
NZ_CP035052	Duplicate from Previous APT Study
NZ_CP039024	Duplicate from Previous APT Study
NZ_CP039026	Duplicate from Previous APT Study
NZ_CP039027	Duplicate from Previous APT Study
NZ_CP039029	Duplicate from Previous APT Study
NZ_CP039030	Duplicate from Previous APT Study
NZ_CP046655	Duplicate from Previous APT Study
NZ_CP049364	Duplicate from Previous APT Study
NZ_CP049365	Duplicate from Previous APT Study
NZ_CP053099	Duplicate from Previous APT Study
NZ_CP053100	Duplicate from Previous APT Study
NZ_CP059042	Duplicate from Previous APT Study
NZ_MK360916	Duplicate from Previous APT Study
NZ_CP015485	Duplicate from Previous APT Study
NZ_CP050396	Duplicate from Previous APT Study
NZ_MK134375	Duplicate from Previous APT Study
NZ_CM009040	Duplicate from Previous APT Study
NZ_CM009044	Duplicate from Previous APT Study
NZ_CM009649	Duplicate from Previous APT Study
NZ_HG977524	Duplicate from Previous APT Study
NZ_CP017643	Duplicate from Previous APT Study
NC_010403	Duplicate from Previous APT Study
NC_016977	Duplicate from Previous APT Study
NC_017163	Duplicate from Previous APT Study
NC_025104	Duplicate from Previous APT Study
NC_025109	Duplicate from Previous APT Study
NC_025111	Duplicate from Previous APT Study
NZ_AYOH01000010	Duplicate from Previous APT Study
NZ_MT802098	Duplicate from Previous APT Study
NZ_MT849283	Duplicate from Previous APT Study
NZ_MT849284	Duplicate from Previous APT Study
NZ_MT849285	Duplicate from Previous APT Study
NC_017848	Duplicate from Previous APT Study
NC_021727	Duplicate from Previous APT Study
NC_021731	Duplicate from Previous APT Study
NZ_MT849275	Duplicate from Previous APT Study
NZ_MT849276	Duplicate from Previous APT Study
NZ_MT849280	Duplicate from Previous APT Study
NZ_MT849282	Duplicate from Previous APT Study
NZ_CP070361	Duplicate from Previous APT Study
NZ_CP113079	Duplicate from Previous APT Study
NZ_CP113081	Duplicate from Previous APT Study
NC_022565	Duplicate from Previous APT Study
NZ_MT849279	Duplicate from Previous APT Study
NZ_MT849281	Duplicate from Previous APT Study
NZ_MT849277	Duplicate from Previous APT Study
NZ_MT849278	Duplicate from Previous APT Study
NZ_MT802099	Duplicate from Previous APT Study
NC_011585	Duplicate from Previous APT Study
NC_010481	Duplicate from Previous APT Study
NC_010605	Duplicate from Previous APT Study
NZ_CP074707	Duplicate from Previous APT Study
NZ_CP074711	Duplicate from Previous APT Study
NC_006877	Duplicate from Previous APT Study
NZ_CP074586	Duplicate from Previous APT Study
NC_025168	Duplicate from Previous APT Study
NC_010401	Duplicate from Previous APT Study
NC_010402	Duplicate from Previous APT Study
NC_010404	Duplicate from Previous APT Study
NC_021730	Duplicate from Previous APT Study
NZ_CP116681	Duplicate from Previous APT Study
NC_013506	Duplicate from Previous APT Study
NC_020525	Duplicate from Previous APT Study
NC_019359	Duplicate from Previous APT Study
NC_020524	Duplicate from Previous APT Study
NC_019199	Duplicate from Previous APT Study
NC_019280	Duplicate from Previous APT Study
NZ_AYFZ01000080	Duplicate from Previous APT Study
NC_012813	Duplicate from Previous APT Study
NZ_CM009083	Duplicate from Previous APT Study
NC_023031	Duplicate from Previous APT Study
NZ_CP079934	Duplicate from Previous APT Study
NC_021489	Duplicate from Previous APT Study
NC_025110	Duplicate from Previous APT Study
NZ_CP070360	Duplicate from Previous APT Study
NZ_CP070364	Duplicate from Previous APT Study
NZ_CP058291	Duplicate from Previous APT Study
NZ_CP070363	Duplicate from Previous APT Study
NZ_CP070359	Duplicate from Previous APT Study
AFDA02000006	Duplicate from Previous APT Study
AFDA02000009	Duplicate from Previous APT Study
AFDA02000010	Duplicate from Previous APT Study
CP007579	Duplicate from Previous APT Study
AEPA01000395	Duplicate from Previous APT Study
CP003848	Duplicate from Previous APT Study
JN377410	Duplicate from Previous APT Study
CM009085	Duplicate from Previous APT Study
CP042206	Duplicate from Previous APT Study
CP042209	Duplicate from Previous APT Study
CP035932	Duplicate from Previous APT Study
CP040044	Duplicate from Previous APT Study
CP040054	Duplicate from Previous APT Study
CP040057	Duplicate from Previous APT Study
CM018764	Duplicate from Previous APT Study
GQ377752	Duplicate from Previous APT Study
KC503911	Duplicate from Previous APT Study
JF343536	Duplicate from Previous APT Study
JX076770	Duplicate from Previous APT Study
MK053932	Duplicate from Previous APT Study
JACGEH010000071	Duplicate from Previous APT Study
JACGEI010000083	Duplicate from Previous APT Study
CP065394	Duplicate from Previous APT Study
CP064293	Duplicate from Previous APT Study
CP064294	Duplicate from Previous APT Study
CP088896	Duplicate from Previous APT Study
CP088897	Duplicate from Previous APT Study
CP101888	Duplicate from Previous APT Study
CU459139	Duplicate from Previous APT Study
L77992	Duplicate from Previous APT Study
CP088900	Duplicate from Previous APT Study
JN872565	Duplicate from Previous APT Study
CP088899	Duplicate from Previous APT Study
CU459138	Duplicate from Previous APT Study
CP007550	Duplicate from Previous APT Study
CP007578	Duplicate from Previous APT Study
AEPA01000396	Duplicate from Previous APT Study
CP001183	Duplicate from Previous APT Study
CP000864	Duplicate from Previous APT Study
CP002523	Duplicate from Previous APT Study
CP003850	Duplicate from Previous APT Study
CP000523	Duplicate from Previous APT Study
CP014293	Duplicate from Previous APT Study
JHUI01000005	Duplicate from Previous APT Study
KJ586856	Duplicate from Previous APT Study
JX069966	Duplicate from Previous APT Study
HG380023	Duplicate from Previous APT Study
AB823544	Duplicate from Previous APT Study
CP058626	Duplicate from Previous APT Study
JACGEJ010000130	Duplicate from Previous APT Study
CP099789	Duplicate from Previous APT Study
CP099792	Duplicate from Previous APT Study
CP099794	Duplicate from Previous APT Study
CP099796	Duplicate from Previous APT Study
CU468232	Duplicate from Previous APT Study
CP040045	Duplicate from Previous APT Study
CP040055	Duplicate from Previous APT Study
AFDA02000011	Duplicate from Previous APT Study
CM009083	Duplicate from Previous APT Study
AFDA02000008	Duplicate from Previous APT Study
CP076803	Duplicate from Previous APT Study
KY984045	Duplicate from Previous APT Study
CU459137	Duplicate from Previous APT Study
CP042208	Duplicate from Previous APT Study
GQ904227	Duplicate from Previous APT Study
KJ534569	Duplicate from Previous APT Study
FM210331	Duplicate from Previous APT Study
AYFZ01000080	Duplicate from Previous APT Study
CP004359	Duplicate from Previous APT Study
CP006769	Duplicate from Previous APT Study
KY984047	Duplicate from Previous APT Study
CP000522	Duplicate from Previous APT Study
CU468231	Duplicate from Previous APT Study
CP035673	Duplicate from Previous APT Study
CP035933	Duplicate from Previous APT Study
AY541809	Duplicate from Previous APT Study
CU468233	Duplicate from Previous APT Study
CP003968	Duplicate from Previous APT Study
CP099970	Duplicate from Previous APT Study
CP042207	Duplicate from Previous APT Study
KY984046	Duplicate from Previous APT Study
GQ861437	Duplicate from Previous APT Study
CU459140	Duplicate from Previous APT Study
CP042210	Duplicate from Previous APT Study
AY228470	Duplicate from Previous APT Study
GQ476987	Duplicate from Previous APT Study
GQ904226	Duplicate from Previous APT Study
EU294228	Duplicate from Previous APT Study
CP007580	Duplicate from Previous APT Study
AYOH01000010	Duplicate from Previous APT Study
CP000865	Duplicate from Previous APT Study
CP001922	Duplicate from Previous APT Study
CP002524	Duplicate from Previous APT Study
CP014292	Duplicate from Previous APT Study
CP040043	Duplicate from Previous APT Study
KF669606	Duplicate from Previous APT Study
KM051846	Duplicate from Previous APT Study
CP076802	Duplicate from Previous APT Study
CP099785	Duplicate from Previous APT Study
CP099787	Duplicate from Previous APT Study
CP099791	Duplicate from Previous APT Study
CP003501	Duplicate from Previous APT Study
CP003887	Duplicate from Previous APT Study
CP003888	Duplicate from Previous APT Study
AP025536	Frame Shift/Assembly Error
CP119235	Frame Shift/Assembly Error
NC_023281	Frame Shift/Assembly Error
NZ_CP026421	Frame Shift/Assembly Error
CP119234	Frame Shift/Assembly Error
NZ_CP061648	Frame Shift/Assembly Error
NZ_CP070365	Frame Shift/Assembly Error
NZ_CP074712	Frame Shift/Assembly Error
NZ_CP077306	Frame Shift/Assembly Error
NZ_CP087369	Frame Shift/Assembly Error
NZ_CP102817	Frame Shift/Assembly Error
NZ_CP102820	Frame Shift/Assembly Error
NZ_CP102824	Frame Shift/Assembly Error
NZ_CP104785	Frame Shift/Assembly Error
NZ_CP119225	Frame Shift/Assembly Error
NZ_MT849274	Frame Shift/Assembly Error
NZ_CP092456	Frame Shift/Assembly Error
NC_010606	Frame Shift/Assembly Error
NZ_CP030757	Frame Shift/Assembly Error
CP012954	Frame Shift/Assembly Error
CP018679	Frame Shift/Assembly Error
CM009028	Frame Shift/Assembly Error
CM009034	Frame Shift/Assembly Error
CM009648	Frame Shift/Assembly Error
CM009031	Frame Shift/Assembly Error
CP027181	Frame Shift/Assembly Error
CP027187	Frame Shift/Assembly Error
CP033770	Frame Shift/Assembly Error
CP041588	Frame Shift/Assembly Error
KU869529	Frame Shift/Assembly Error
MK531539	Frame Shift/Assembly Error
CP072274	Frame Shift/Assembly Error
CP072299	Frame Shift/Assembly Error
CP072289	Frame Shift/Assembly Error
CP072279	Frame Shift/Assembly Error
CP072294	Frame Shift/Assembly Error
CP072304	Frame Shift/Assembly Error
CP072402	Frame Shift/Assembly Error
CP072284	Frame Shift/Assembly Error
CP026748	Frame Shift/Assembly Error
NZ_JAAAFZ010000006	Incomplete/Linear Plasmid Sequence
NZ_NBNJ01000001	Incomplete/Linear Plasmid Sequence
NZ_JABBFT010000035	Incomplete/Linear Plasmid Sequence
NZ_JADAIZ010000254	Incomplete/Linear Plasmid Sequence
NZ_JADAIZ010000258	Incomplete/Linear Plasmid Sequence
NZ_JADAJL010000288	Incomplete/Linear Plasmid Sequence
NZ_JTEC01000021	Incomplete/Linear Plasmid Sequence
NZ_JADAJJ010000286	Incomplete/Linear Plasmid Sequence
NZ_JADAIU010000116	Incomplete/Linear Plasmid Sequence
NZ_JTEC01000024	Incomplete/Linear Plasmid Sequence
NZ_CBRO020000081	Incomplete/Linear Plasmid Sequence
NZ_CBRO020000086	Incomplete/Linear Plasmid Sequence
NZ_JADAJJ010000292	Incomplete/Linear Plasmid Sequence
NZ_JADAIY010000265	Incomplete/Linear Plasmid Sequence
NZ_LJHB01000040	Incomplete/Linear Plasmid Sequence
NZ_JADAIZ010000261	Incomplete/Linear Plasmid Sequence
NZ_JADAJJ010000298	Incomplete/Linear Plasmid Sequence
NZ_JTEC01000034	Incomplete/Linear Plasmid Sequence
NZ_JAKVIM010000029	Incomplete/Linear Plasmid Sequence
NZ_JADAJL010000297	Incomplete/Linear Plasmid Sequence
NZ_NPMK01000075	Incomplete/Linear Plasmid Sequence
NZ_JAAAFZ010000010	Incomplete/Linear Plasmid Sequence
NZ_CBRO020000082	Incomplete/Linear Plasmid Sequence
NZ_CBRO020000076	Incomplete/Linear Plasmid Sequence
NZ_JAKUML010000025	Incomplete/Linear Plasmid Sequence
NZ_PHHB02000048	Incomplete/Linear Plasmid Sequence
NZ_PHJY02000121	Incomplete/Linear Plasmid Sequence
NZ_CBRO020000087	Incomplete/Linear Plasmid Sequence
NZ_JADAIZ010000255	Incomplete/Linear Plasmid Sequence
NZ_LJHB01000039	Incomplete/Linear Plasmid Sequence
NZ_PHJW02000090	Incomplete/Linear Plasmid Sequence
NZ_PHJX02000072	Incomplete/Linear Plasmid Sequence
NZ_PHJV02000053	Incomplete/Linear Plasmid Sequence
NZ_JADAIN010000055	Incomplete/Linear Plasmid Sequence
NZ_CBRO020000073	Incomplete/Linear Plasmid Sequence
NZ_JAAAFZ010000013	Incomplete/Linear Plasmid Sequence
NZ_JADAJJ010000287	Incomplete/Linear Plasmid Sequence
NZ_NPMK01000072	Incomplete/Linear Plasmid Sequence
NZ_JADAJL010000289	Incomplete/Linear Plasmid Sequence
NZ_CBRO020000093	Incomplete/Linear Plasmid Sequence
NZ_JADAJL010000294	Incomplete/Linear Plasmid Sequence
NZ_JADAIX010000100	Incomplete/Linear Plasmid Sequence
NZ_CBRO020000090	Incomplete/Linear Plasmid Sequence
NZ_JTEC01000049	Incomplete/Linear Plasmid Sequence
NZ_CBRO020000089	Incomplete/Linear Plasmid Sequence
NZ_JADAJL010000290	Incomplete/Linear Plasmid Sequence
NZ_JADAIO010000224	Incomplete/Linear Plasmid Sequence
NZ_JACSHM010000018	Incomplete/Linear Plasmid Sequence
NZ_JADAIW010000164	Incomplete/Linear Plasmid Sequence
NZ_CBRO020000075	Incomplete/Linear Plasmid Sequence
NZ_JADAJJ010000288	Incomplete/Linear Plasmid Sequence
NZ_JADAIZ010000262	Incomplete/Linear Plasmid Sequence
NZ_NPMK01000067	Incomplete/Linear Plasmid Sequence
NZ_NPMK01000066	Incomplete/Linear Plasmid Sequence
NZ_JADAIV010000230	Incomplete/Linear Plasmid Sequence
NZ_JADAJL010000292	Incomplete/Linear Plasmid Sequence
NZ_JADAJJ010000290	Incomplete/Linear Plasmid Sequence
NZ_WIVL01000010	Incomplete/Linear Plasmid Sequence
NZ_JADAIZ010000256	Incomplete/Linear Plasmid Sequence
NZ_JADAIM010000278	Incomplete/Linear Plasmid Sequence
NZ_WIVL01000063	Incomplete/Linear Plasmid Sequence
NZ_JTEC01000055	Incomplete/Linear Plasmid Sequence
NZ_NPMK01000064	Incomplete/Linear Plasmid Sequence
NZ_JADAIT010000287	Incomplete/Linear Plasmid Sequence
NZ_JAPEQW010000049	Incomplete/Linear Plasmid Sequence
NZ_JADAIZ010000257	Incomplete/Linear Plasmid Sequence
NZ_LXWY01000219	Incomplete/Linear Plasmid Sequence
NZ_JAPEQW010000050	Incomplete/Linear Plasmid Sequence
NZ_JADAJJ010000293	Incomplete/Linear Plasmid Sequence
NZ_NDXK01000055	Incomplete/Linear Plasmid Sequence
NZ_JAIWIJ010000003	Incomplete/Linear Plasmid Sequence
NZ_MJHA01000001	Incomplete/Linear Plasmid Sequence
NZ_NPMK01000061	Incomplete/Linear Plasmid Sequence
NZ_CBRO020000092	Incomplete/Linear Plasmid Sequence
NZ_JADAJL010000296	Incomplete/Linear Plasmid Sequence
NZ_LXYW01000058	Incomplete/Linear Plasmid Sequence
NZ_JTEC01000070	Incomplete/Linear Plasmid Sequence
NZ_JADAJJ010000291	Incomplete/Linear Plasmid Sequence
NZ_JADAJL010000293	Incomplete/Linear Plasmid Sequence
NZ_JADAIY010000263	Incomplete/Linear Plasmid Sequence
NZ_NKKP01000245	Incomplete/Linear Plasmid Sequence
NZ_JADAJJ010000294	Incomplete/Linear Plasmid Sequence
NZ_MJHA01000002	Incomplete/Linear Plasmid Sequence
NZ_JADAIR010000198	Incomplete/Linear Plasmid Sequence
NZ_WIVN01000028	Incomplete/Linear Plasmid Sequence
NZ_JADAIO010000225	Incomplete/Linear Plasmid Sequence
NZ_JADAIR010000199	Incomplete/Linear Plasmid Sequence
NZ_JADAIS010000175	Incomplete/Linear Plasmid Sequence
NZ_JADAIX010000101	Incomplete/Linear Plasmid Sequence
NZ_JADAIN010000056	Incomplete/Linear Plasmid Sequence
NZ_JADAIM010000277	Incomplete/Linear Plasmid Sequence
NZ_CBRO020000094	Incomplete/Linear Plasmid Sequence
NZ_NPMK01000059	Incomplete/Linear Plasmid Sequence
NZ_MEDH01000051	Incomplete/Linear Plasmid Sequence
NZ_MEDG01000049	Incomplete/Linear Plasmid Sequence
NZ_JADAIS010000174	Incomplete/Linear Plasmid Sequence
NZ_JADAIP010000277	Incomplete/Linear Plasmid Sequence
NZ_JAKVIM010000031	Incomplete/Linear Plasmid Sequence
NZ_JADAIY010000262	Incomplete/Linear Plasmid Sequence
NZ_MEDH01000052	Incomplete/Linear Plasmid Sequence
NZ_MEDG01000050	Incomplete/Linear Plasmid Sequence
NZ_JADAJJ010000289	Incomplete/Linear Plasmid Sequence
NZ_NOZT01000081	Incomplete/Linear Plasmid Sequence
NZ_PHJY02000122	Incomplete/Linear Plasmid Sequence
NZ_JADAIT010000286	Incomplete/Linear Plasmid Sequence
NZ_JADAJL010000291	Incomplete/Linear Plasmid Sequence
NZ_CBRO020000080	Incomplete/Linear Plasmid Sequence
NZ_JADAIM010000276	Incomplete/Linear Plasmid Sequence
NZ_CBRO020000091	Incomplete/Linear Plasmid Sequence
NZ_WIVL01000045	Incomplete/Linear Plasmid Sequence
NZ_CBRO020000084	Incomplete/Linear Plasmid Sequence
NZ_NPMK01000055	Incomplete/Linear Plasmid Sequence
NZ_CBRO020000078	Incomplete/Linear Plasmid Sequence
NZ_NPMK01000054	Incomplete/Linear Plasmid Sequence
NZ_NPMK01000053	Incomplete/Linear Plasmid Sequence
NZ_JADAJJ010000296	Incomplete/Linear Plasmid Sequence
NZ_JADAIZ010000259	Incomplete/Linear Plasmid Sequence
NZ_NOZT01000083	Incomplete/Linear Plasmid Sequence
NZ_WIVL01000084	Incomplete/Linear Plasmid Sequence
NZ_NKKP01000246	Incomplete/Linear Plasmid Sequence
NZ_JADAJL010000302	Incomplete/Linear Plasmid Sequence
NZ_JADAJJ010000300	Incomplete/Linear Plasmid Sequence
NZ_JADAIZ010000263	Incomplete/Linear Plasmid Sequence
NZ_JADAIW010000165	Incomplete/Linear Plasmid Sequence
NZ_CBRO020000079	Incomplete/Linear Plasmid Sequence
NZ_JAAAFZ010000019	Incomplete/Linear Plasmid Sequence
NZ_JADAIP010000276	Incomplete/Linear Plasmid Sequence
NZ_NPMK01000052	Incomplete/Linear Plasmid Sequence
NZ_JADAJX010000222	Incomplete/Linear Plasmid Sequence
NZ_JTEC01000072	Incomplete/Linear Plasmid Sequence
NZ_JTEC01000073	Incomplete/Linear Plasmid Sequence
NZ_WIVL01000014	Incomplete/Linear Plasmid Sequence
NZ_NKKP01000247	Incomplete/Linear Plasmid Sequence
NZ_JADAIQ010000285	Incomplete/Linear Plasmid Sequence
NZ_JADAJL010000298	Incomplete/Linear Plasmid Sequence
NZ_JADAIQ010000287	Incomplete/Linear Plasmid Sequence
NZ_JADAIV010000229	Incomplete/Linear Plasmid Sequence
NZ_JADAIP010000275	Incomplete/Linear Plasmid Sequence
NZ_CBRO020000074	Incomplete/Linear Plasmid Sequence
NZ_JAAAFZ010000020	Incomplete/Linear Plasmid Sequence
NZ_WIVL01000060	Incomplete/Linear Plasmid Sequence
NZ_JADAJJ010000295	Incomplete/Linear Plasmid Sequence
NZ_WIVL01000015	Incomplete/Linear Plasmid Sequence
NZ_LXYW01000007	Incomplete/Linear Plasmid Sequence
NZ_JAKVIM010000034	Incomplete/Linear Plasmid Sequence
NZ_NPMK01000047	Incomplete/Linear Plasmid Sequence
NZ_JAPHLB020000013	Incomplete/Linear Plasmid Sequence
NZ_MEDH01000054	Incomplete/Linear Plasmid Sequence
NZ_MEDG01000052	Incomplete/Linear Plasmid Sequence
NZ_JADAIO010000223	Incomplete/Linear Plasmid Sequence
NZ_JADAIQ010000286	Incomplete/Linear Plasmid Sequence
NZ_NPMK01000045	Incomplete/Linear Plasmid Sequence
NZ_JADAJX010000221	Incomplete/Linear Plasmid Sequence
NZ_JADAIS010000173	Incomplete/Linear Plasmid Sequence
NZ_NKKP01000244	Incomplete/Linear Plasmid Sequence
NZ_LXYW01000078	Incomplete/Linear Plasmid Sequence
NZ_NOZT01000098	Incomplete/Linear Plasmid Sequence
NZ_JAPHLB020000014	Incomplete/Linear Plasmid Sequence
NZ_NKKP01000248	Incomplete/Linear Plasmid Sequence
NZ_CBRO020000077	Incomplete/Linear Plasmid Sequence
NZ_JADAJL010000299	Incomplete/Linear Plasmid Sequence
NZ_NKKO01000103	Incomplete/Linear Plasmid Sequence
NZ_JADAIR010000197	Incomplete/Linear Plasmid Sequence
NZ_LXWY01000002	Incomplete/Linear Plasmid Sequence
NZ_JADAJJ010000297	Incomplete/Linear Plasmid Sequence
NZ_NPMK01000043	Incomplete/Linear Plasmid Sequence
NZ_JADAJL010000300	Incomplete/Linear Plasmid Sequence
NZ_JADAJL010000295	Incomplete/Linear Plasmid Sequence
NZ_NKKP01000243	Incomplete/Linear Plasmid Sequence
NZ_WIVL01000082	Incomplete/Linear Plasmid Sequence
NZ_JADAIZ010000260	Incomplete/Linear Plasmid Sequence
NZ_CP033859	Incomplete/Linear Plasmid Sequence
NZ_CP041225	Incomplete/Linear Plasmid Sequence
NZ_LQXZ01000009	Incomplete/Linear Plasmid Sequence
NZ_CP041226	Incomplete/Linear Plasmid Sequence
NZ_CP041227	Incomplete/Linear Plasmid Sequence
NZ_CP033864	Incomplete/Linear Plasmid Sequence
NZ_CP033863	Incomplete/Linear Plasmid Sequence
NZ_CP065664	Incomplete/Linear Plasmid Sequence
NZ_CP065665	Incomplete/Linear Plasmid Sequence
NZ_CP048016	Incomplete/Linear Plasmid Sequence
NZ_CP048017	Incomplete/Linear Plasmid Sequence
NZ_CP048018	Incomplete/Linear Plasmid Sequence
NZ_CP048658	Incomplete/Linear Plasmid Sequence
NZ_CP048672	Incomplete/Linear Plasmid Sequence
NZ_CP049917	Incomplete/Linear Plasmid Sequence
NZ_CP049807	Incomplete/Linear Plasmid Sequence
NZ_CP049808	Incomplete/Linear Plasmid Sequence
NZ_CP049809	Incomplete/Linear Plasmid Sequence
NZ_CP049810	Incomplete/Linear Plasmid Sequence
NZ_CP051212	Incomplete/Linear Plasmid Sequence
NZ_JADAIY010000261	Incomplete/Linear Plasmid Sequence
NZ_CP068203	Incomplete/Linear Plasmid Sequence
NZ_CP068204	Incomplete/Linear Plasmid Sequence
NZ_CP068207	Incomplete/Linear Plasmid Sequence
NZ_CP068208	Incomplete/Linear Plasmid Sequence
NZ_CP068197	Incomplete/Linear Plasmid Sequence
NZ_CP068198	Incomplete/Linear Plasmid Sequence
NZ_CP068199	Incomplete/Linear Plasmid Sequence
NZ_CP068201	Incomplete/Linear Plasmid Sequence
NZ_CP068190	Incomplete/Linear Plasmid Sequence
NZ_CP068191	Incomplete/Linear Plasmid Sequence
NZ_CP068192	Incomplete/Linear Plasmid Sequence
NZ_CP068194	Incomplete/Linear Plasmid Sequence
NZ_CP068184	Incomplete/Linear Plasmid Sequence
NZ_CP069539	Incomplete/Linear Plasmid Sequence
NZ_CP069541	Incomplete/Linear Plasmid Sequence
NZ_CP077337	Incomplete/Linear Plasmid Sequence
NZ_CP077372	Incomplete/Linear Plasmid Sequence
NZ_CP066122	Incomplete/Linear Plasmid Sequence
NZ_CP083659	Incomplete/Linear Plasmid Sequence
NZ_CP083660	Incomplete/Linear Plasmid Sequence
NZ_CP104334	Incomplete/Linear Plasmid Sequence
NZ_CP104336	Incomplete/Linear Plasmid Sequence
NZ_CP084922	Incomplete/Linear Plasmid Sequence
NZ_CP084924	Incomplete/Linear Plasmid Sequence
NZ_CP087368	Incomplete/Linear Plasmid Sequence
NZ_CP087367	Incomplete/Linear Plasmid Sequence
NZ_CP087347	Incomplete/Linear Plasmid Sequence
NZ_CP087341	Incomplete/Linear Plasmid Sequence
NZ_CP087364	Incomplete/Linear Plasmid Sequence
CP087361	Incomplete/Linear Plasmid Sequence
NZ_CP087323	Incomplete/Linear Plasmid Sequence
NZ_CP087324	Incomplete/Linear Plasmid Sequence
NZ_CP087318	Incomplete/Linear Plasmid Sequence
NZ_CP087305	Incomplete/Linear Plasmid Sequence
NZ_CP087308	Incomplete/Linear Plasmid Sequence
NZ_CP090383	Incomplete/Linear Plasmid Sequence
NZ_CP090866	Incomplete/Linear Plasmid Sequence
NZ_CP090867	Incomplete/Linear Plasmid Sequence
NZ_CP090868	Incomplete/Linear Plasmid Sequence
NZ_CP094548	Incomplete/Linear Plasmid Sequence
NZ_CP094550	Incomplete/Linear Plasmid Sequence
NZ_CP094552	Incomplete/Linear Plasmid Sequence
NZ_CP094553	Incomplete/Linear Plasmid Sequence
NZ_CP094554	Incomplete/Linear Plasmid Sequence
NZ_CP114272	Incomplete/Linear Plasmid Sequence
NZ_CP114257	Incomplete/Linear Plasmid Sequence
NZ_CP114258	Incomplete/Linear Plasmid Sequence
NZ_CP114259	Incomplete/Linear Plasmid Sequence
NZ_CP114260	Incomplete/Linear Plasmid Sequence
NZ_CP114262	Incomplete/Linear Plasmid Sequence
NC_024959	Incomplete/Linear Plasmid Sequence
NC_024999	Incomplete/Linear Plasmid Sequence
NG_073955	Incomplete/Linear Plasmid Sequence
CP041228	Incomplete/Linear Plasmid Sequence
CP066120	Incomplete/Linear Plasmid Sequence
CP077241	Incomplete/Linear Plasmid Sequence
CP087322	Incomplete/Linear Plasmid Sequence
CP087372	Incomplete/Linear Plasmid Sequence
CP090869	Incomplete/Linear Plasmid Sequence
CP114261	Incomplete/Linear Plasmid Sequence
CP114262	Incomplete/Linear Plasmid Sequence
CP114263	Incomplete/Linear Plasmid Sequence
CP114265	Incomplete/Linear Plasmid Sequence
CP114266	Incomplete/Linear Plasmid Sequence
CP114267	Incomplete/Linear Plasmid Sequence
CP114268	Incomplete/Linear Plasmid Sequence
CP114269	Incomplete/Linear Plasmid Sequence
CP114270	Incomplete/Linear Plasmid Sequence
CP114271	Incomplete/Linear Plasmid Sequence
CP114273	Incomplete/Linear Plasmid Sequence
CP114274	Incomplete/Linear Plasmid Sequence
CP114275	Incomplete/Linear Plasmid Sequence
CP114276	Incomplete/Linear Plasmid Sequence
CP026427	Incomplete/Linear Plasmid Sequence
CP041226	Incomplete/Linear Plasmid Sequence
CP041227	Incomplete/Linear Plasmid Sequence
NZ_CP068200	Incomplete/Linear Plasmid Sequence
NG_088453	Incomplete/Linear Plasmid Sequence
NZ_CP087320	Incomplete/Linear Plasmid Sequence
NG_048137	Incomplete/Linear Plasmid Sequence
NG_065853	Incomplete/Linear Plasmid Sequence
NZ_CP087360	Incomplete/Linear Plasmid Sequence
NZ_CP104338	Incomplete/Linear Plasmid Sequence
NG_073455	Incomplete/Linear Plasmid Sequence
CP039521	Incomplete/Linear Plasmid Sequence
CP039995	Incomplete/Linear Plasmid Sequence
CP077829	Incomplete/Linear Plasmid Sequence
CM003741	Incomplete/Linear Plasmid Sequence
CP014217	Incomplete/Linear Plasmid Sequence
CP040262	Incomplete/Linear Plasmid Sequence
CP098794	Incomplete/Linear Plasmid Sequence
CP098799	Incomplete/Linear Plasmid Sequence
CM004453	Incomplete/Linear Plasmid Sequence
NC_021728	Incomplete/Linear Plasmid Sequence
NC_021732	Incomplete/Linear Plasmid Sequence
CP048132	Reassembled/resubmitted plasmid
CP007714	Reassembled/resubmitted plasmid
CM003318	Reassembled/resubmitted plasmid
CP061712	Reassembled/resubmitted plasmid
CP087596	Reassembled/resubmitted plasmid
CP038651	Reassembled/resubmitted plasmid
CP038652	Reassembled/resubmitted plasmid
CM009050	Reassembled/resubmitted plasmid
CP059389	Reassembled/resubmitted plasmid
CP040052	Reassembled/resubmitted plasmid
CP050423	Reassembled/resubmitted plasmid
CP050407	Reassembled/resubmitted plasmid
CP050528	Reassembled/resubmitted plasmid
CP072126	Reassembled/resubmitted plasmid
