# Supplementary material for: Pan-Genus Analysis and Typing of Antimicrobial Resistance Plasmids in Acinetobacter
Source: Research Square preprint supplement (doi:10.21203/rs.3.rs-6165751/v1), 2025-05-12
Supplement: Supplementary file 2 [file cee1843c79354002ec9369a0.xlsx]

## Sheet: Metadata
Table S2. Properties of plasmids studied here
Accession	Species	Plasmid Name	Rep Family	Type	No Rep Group	Length (bp)	Strain Name	BioSample Accession	Region	Country	Isolation Source	Isolation Type	Year	Resistance	Resistance Genes	Previously studied
NZ_AP021939.1	A. pittii	pWP2-W18-ESBL-11_3	Rep_1	r1-T1	-	2726	WP2-W18-ESBL-13	SAMD00194360	Asia	Japan	Effluent wastewater	Waste water	2018	None	-	No
NZ_CP114383.1	A. baumannii	pAB0155-2	Rep_1	r1-T2	-	2343	AB6870155	SAMN03105183	Pacific	Australia	Sputum	Clinical	2002	None	-	No
NZ_CP033121.1	A. wuhouensis	p12_010062	Rep_1	r1-T12	-	2121	WCHAW010062	SAMN07138954	Asia	China	Sewage	Waste water	2015	None	-	No
NZ_CP022302.1	A. johnsonii	pIC001D	Rep_1	r1-T19	-	1859	IC001	SAMN07298690	Asia	Japan	River	Environment	2003	None	-	No
NZ_CP028572.2	A. pittii	p4_005046	Rep_1	r1-T2	-	2295	WCHAP005046	SAMN08364583	Asia	China	Human	Clinical	nr	None	-	No
NZ_CP035943.1	A. cumulans	p8_060092	Rep_1	r1-T14	-	1791	WCHAc060092	SAMN08772519	Asia	China	Sewage	Waste water	2018	None	-	No
NZ_CP032007.1	A. haemolyticus	pAhaem11616b	Rep_1	r1-T23	-	5924	11616	SAMN09927968	North America	Mexico	Blood	Clinical	2012	None	-	No
NZ_CP031987.1	A. haemolyticus	pAhaemAN3a	Rep_1 & Rep_3	multi-rep	-	7222	AN3	SAMN09927972	North America	Mexico	Peritoneal dialysis liquid	Clinical	2010	None	-	No
NZ_CP059689.1	A. radioresistens	unnamed4	Rep_1	r1-T15	-	2245	FDAARGOS_731	SAMN11056446	North America	USA	Skin	Clinical	nr	None	-	No
NZ_CP041289.1	A. indicus	p94-2-p5	Rep_1	r1-T21	-	1601	94-2	SAMN12158188	Asia	China	Cow	Animal	2018	None	-	No
NZ_CP041367.1	A. kanungonis	p2	Rep_1	r1-T20	-	1579	SE63	SAMN12228392	Asia	China	Mangrove wetland	Environment	2013	None	-	No
NC_025118.1	Acinetobacter sp.	pM131-9	Rep_1	r1-T9	-	2371	M131	SAMN14226311	Unknown	Unknown	Unknown	Unknown	nr	None	-	No
NC_025169.1	Acinetobacter sp.	pM131-10	Rep_1	r1-T11	-	1958	M131	SAMN14226312	Unknown	Unknown	Unknown	Unknown	nr	None	-	No
NZ_CP060816.1	Acinetobacter sp013417555	pXM9F202-2-2k	Rep_1	r1-T24	-	2301	XM9F202-2	SAMN15944884	Asia	China	Chicken faeces	Animal	2020	None	-	No
NZ_CP061665.1	A. seifertii	pAS28-1	Rep_1	r1-T1	-	2725	AS28	SAMN16092219	Asia	Taiwan	Blood	Clinical	2010-2017	None	-	No
NZ_CP104658.1	A. variabilis	unnamed7	Rep_1	r1-T23	-	2366	2021CK-01005	SAMN19317614	North America	USA	Wound/Abscess	Clinical	2021	None	-	No
NZ_CP084311.1	A. pseudolwoffii	pXMC5X702-2.3k	Rep_1	r1-T22	-	2361	XMC5X702	SAMN20477963	Asia	China	Chicken faeces	Animal	2020	None	-	No
NZ_CP087307.1	A. baumannii	p2OC081	Rep_1	r1-T2	-	2359	OC081	SAMN23078461	Europe	Germany	Human	Clinical	nr	None	-	No
NZ_CP090073.1	Acinetobacter sp.	pYUSHP14-6	Rep_1	r1-T25	-	2252	SH20PTE14	SAMN24291981	Asia	China	Pig faeces	Animal	2020	None	-	No
NZ_CP113449.1	A. baumannii	pC9_7	Rep_1	multi-rep	-	4311	C9	SAMN25159975	North America	USA	Draining-Matting Conveyor	Environment	2019	None	-	No
NZ_CP103343.1	A. baumannii	unnamed6	Rep_1	r1-T10	-	2368	AB105	SAMN30068511	Asia	East Asia	Human	Clinical	2022	None	-	No
NZ_CP106991.1	A. baumannii	pNY13623-3	Rep_1	r1-T26	-	2272	NY13623	SAMN31100588	Unknown	Unknown	Sputum	Clinical	nr	None	-	No
CM003316.1	A. baumannii	pMRSN58-2.7	Rep_1	r1-T1	-	2725	MRSN 58	SAMN02906928	North America	USA	Wound	Clinical	2010	None	-	Yes
JN872565.1	A. baumannii	pTS236	Rep_1	r1-T5	-	2252	DS002	SAMN14226168	Asia	India	Unknown	Environment	2016	None	-	Yes
CM003313.1	A. baumannii	pMRSN7339-2.3	Rep_1	r1-T2	-	2343	MRSN 7339	SAMN02906929	North America	USA	Wound	Clinical	2004	None	-	Yes
L77992.1	A. baumannii	pAB49	Rep_1	r1-T2	-	2343	B49	-	Unknown	Unknown	Clinical	Clinical	nr	None	-	Yes
NC_010403.1	A. baumannii	p4ABAYE	Rep_1	r1-T1	-	2726	AYE	SAMEA3138297	Europe	Unknown	Unknown	Clinical	nr	None	-	Yes
CP088900.1	A. baumannii	pDETABR21-5	Rep_1	r1-T2	-	2309	DETAB-R21	SAMN23553142	Asia	China	Faeces	Clinical	2021	None	-	Yes
CP008709.1	A. baumannii	p3AB5075	Rep_1	r1-T4	-	1967	AB5075-UW	SAMN02894434	North America	USA	Tibia/osteomyelitis of diabetes patient	Clinical	2008	None	-	Yes
CP021783.1	A. baumannii	pA85-1	Rep_1	r1-T1	-	2726	A85	SAMN07125723	Pacific	Australia	Sputum	Clinical	2003	None	-	Yes
CP030108.1	A. baumannii	pDA33382-2	Rep_1	r1-T2	-	2359	DA33382	SAMN09460321	Europe	Germany	Tracheal secretion	Clinical	nr	None	-	Yes
AP024811.1	A. baumannii	pOCUAc18-9	Rep_1	r1-T8	-	3496	OCU_Ac18	SAMD00330123	Asia	Japan	Blood	Clinical	2016	None	-	Yes
CU459139.1	A. baumannii	p4ABAYE	Rep_1	r1-T1	-	2726	AYE	SAMEA3138279	Europe	France	Blood	Clinical	2001	None	-	Yes
CM009683.1	A. baumannii	p4ZQ5	Rep_1	r1-T1	-	2725	ZQ5	SAMN08093364	Asia	Iraq	Wound swab	Clinical	2016	None	-	Yes
CM009041.2	A. baumannii	p4ZQ6	Rep_1	r1-T1	-	2725	ZQ6	SAMN08093365	Asia	Iraq	Wound swab	Clinical	2016	None	-	Yes
CP080454.1	A. baumannii	pMRSN56-2	Rep_1	r1-T1	-	2725	MRSN 56	SAMN19955388	North America	USA	Hip	Clinical	2010	None	-	Yes
CP021784.1	A. baumannii	pA85-1a	Rep_1	r1-T2	-	2343	A85	SAMN07125723	Pacific	Australia	Sputum	Clinical	2003	None	-	Yes
CP080453.1	A. baumannii	pMRSN56-1	Rep_1	r1-T6	-	2178	MRSN 56	SAMN19955388	North America	USA	Hip	Clinical	2010	None	-	Yes
CP088899.1	A. baumannii	pDETABR21-4	Rep_1	r1-T7	-	2742	DETAB-R21	SAMN23553142	Asia	China	Faeces	Clinical	2021	None	-	Yes
NZ_CP061623.1	A. seifertii	pAS49-3	Rep	rP-T1	-	74130	AS49	SAMN16092229	Asia	Taiwan	Blood	Clinical	2010-2017	Carbapenem	blaOXA-82	No
NZ_CP041292.1	A. indicus	p94-2-p3	Rep	rP-T29	-	6749	94-2	SAMN12158188	Asia	China	Cow	Animal	2018	None	-	No
NZ_CP044460.1	A. indicus	pB18-5	Rep	rP-T20	-	21855	B18	SAMN12429970	Asia	China	Pigeon	Animal	2016	None	-	No
NZ_JACGEG010000029.1	A. nosocomialis	pAC25-2	Rep	rP-T10	-	4862	AC25	SAMN15636490	Asia	Malaysia	Wound	Clinical	2011	None	-	No
NZ_CP080638.1	A. lwoffii	pALWEK1.17	Rep	rP-T30	-	4181	EK30A	SAMN05251105	Asia	Russia	Permafrost	Environment	nr	None	-	No
CP104296.1	A. baumannii	pDETAB-C9-1	Rep	rP-T1	-	73444	DETAB-C9	SAMN30697644	Asia	China	Sputum	Clinical	2019	None	-	No
NZ_CP078032.1	A. variabilis	pAV_175-6	Rep	rP-T11	-	4226	AV_175	SAMN10248995	Asia	Pakistan	Alcohol foam dispenser in hospital intensive care unit	Clinical	2016	None	-	No
NZ_CP078044.1	A. junii	pAJ_068-3	Rep	rP-T9	-	19316	AJ_068	SAMN10249224	Asia	Pakistan	Washroom sink in hospital intensive care unit	Clinical	2016	None	-	No
NZ_CP107588.1	A. baumannii	unnamed1	Rep	rP-T1	-	67019	1326527-2	SAMN30898316	North America	USA	Skin	Clinical	2018	None	-	No
NZ_CP087355.1	A. baumannii	p1DB002	Rep	rP-T1	-	70098	DB002	SAMN23078444	Europe	Germany	Human	Clinical	nr	Aminoglycoside	aphA6	No
NZ_CP061581.1	A. seifertii	pAS63-3	Rep	rP-T7	-	3856	AS63	SAMN16092239	Asia	Taiwan	Blood	Clinical	2010-2017	None	-	No
NZ_CP061588.1	A. seifertii	pAS62-6	Rep	rP-T7	-	3855	AS62	SAMN16092238	Asia	Taiwan	Blood	Clinical	2010-2017	None	-	No
NZ_CP019149.1	A. lwoffii	pZS-9	Rep	rP-T26	-	5246	ZS207	SAMN06191591	Europe	Poland	Microbial mats from gold mine	Environment	2012	None	-	No
NZ_CP031986.1	A. haemolyticus	pAhaemAN3b	Rep	rP-T9	-	15913	AN3	SAMN09927972	North America	Mexico	Peritoneal dialysis liquid	Clinical	2010	None	-	No
NZ_CP061608.1	A. seifertii	pAS53-5	Rep	rP-T7	-	3857	AS53	SAMN16092232	Asia	Taiwan	Blood	Clinical	2010-2017	None	-	No
NZ_CP080578.1	A. lwoffii	pALWVS1.2	Rep	rP-T18	-	15780	VS15	SAMN05251106	Asia	Russia	Permafrost	Environment	nr	None	-	No
NZ_CP061586.1	A. seifertii	pAS62-4	Rep	rP-T12	-	69286	AS62	SAMN16092238	Asia	Taiwan	Blood	Clinical	2010-2017	None	-	No
NZ_CP061606.1	A. seifertii	pAS53-3	Rep	rP-T3	-	66820	AS53	SAMN16092232	Asia	Taiwan	Blood	Clinical	2010-2017	None	-	No
NZ_CP107591.1	A. baumannii	unnamed1	Rep	rP-T1	-	67019	1326569	SAMN30898321	North America	USA	Skin	Clinical	2018	None	-	No
NZ_CP117765.1	A. baumannii	unnamed1	Rep	rP-T1	-	72322	2022CK-00784	SAMN32733960	North America	USA	Wound/Abscess	Clinical	2022	None	-	No
NZ_CP061662.1	A. seifertii	pAS31-2	Rep	rP-T1	-	75214	AS31	SAMN16092220	Asia	Taiwan	Blood	Clinical	2010-2017	Carbapenem	blaOXA-115	No
CP115624.1	A. baumannii	unnamed1	Rep	rP-T1	-	71598	2022CK-00340	SAMN28788566	North America	USA	Wound/Abscess	Clinical	2022	None	-	No
NZ_MT802097.1	A. baumannii	unnamed	Rep	rP-T1	-	78023	2018HEBAB1	-	Asia	China	Pus	Clinical	2018	Carbapenem	blaOXA-23	No
NZ_CP087349.1	A. baumannii	p1DB006	Rep	rP-T1	-	71410	DB006	SAMN23078448	Europe	Germany	Human	Clinical	nr	Aminoglycoside	aphA6	No
NZ_ALIR01000020.1	A. radioresistens	pWCA157-6.5	Rep	rP-T25	-	6534	WC-A-157	SAMN02436573	Middle East	Iraq	Unknown	Unknown	2008	None	-	No
NZ_CP087375.1	A. baumannii	p1DB001	Rep	rP-T1	-	70098	DB001	SAMN23078443	Europe	Germany	Human	Clinical	nr	Aminoglycoside	aphA6	No
NZ_JAQSVA010000035.1	A. baumannii	pV15_1	Rep	rP-T1	-	68113	V15	SAMN33101523	Europe	Lithuania	Human	Clinical	2010	None	-	No
NZ_CP082229.1	A. baumannii	p2018HLJAB1	Rep	rP-T1	-	78023	2018HLJAB1	SAMN15538696	Asia	China	Pus	Clinical	2018	Carbapenem	blaOXA-23	No
NZ_CP117763.1	A. baumannii	unnamed2	Rep	rP-T1	-	66484	2022CK-00839	SAMN32734006	North America	USA	Blood	Clinical	2022	None	-	No
NZ_CP061625.1	A. seifertii	pAS49-5	Rep	rP-T7	-	3857	AS49	SAMN16092229	Asia	Taiwan	Blood	Clinical	2010-2017	None	-	No
NZ_CP031982.1	A. haemolyticus	pAhaemAN4b	Rep	rP-T28	-	4481	AN4	SAMN09927973	North America	Mexico	Ulcer by decubitus	Clinical	2010	None	-	No
NZ_MH401130.1	A. baumannii	pA230-1	Rep	rP-T1	-	72085	A230	-	Europe	UK	Human	Clinical	1997	Aminoglycoside	aphA6, aphA6	No
NZ_JAPHLB020000021.1	A. baumannii	pT190_7	Rep	rP-T5	-	4721	T190	SAMN25160020	North America	USA	Draining-Matting Conveyor	Environment	2019	None	-	No
NZ_CP087311.1	A. baumannii	p2OC068	Rep	rP-T1	-	83611	OC068	SAMN23078460	Europe	Germany	Human	Clinical	nr	Multiple	aphA6, sul1, dfrA7, aac(6')-Ib-AKT, blaGES-11, strA, strB, aadA2, cmlA1, aadB	No
NZ_CP032111.1	A. lwoffii	pALWEK1.9	Rep	rP-T31	-	5223	EK30A	SAMN05251105	Asia	Russia	Permafrost	Environment	nr	None	-	No
NZ_CP080641.1	A. lwoffii	pALWEK1.14	Rep	rP-T22	-	4760	EK30A	SAMN05251105	Asia	Russia	Permafrost	Environment	nr	None	-	No
NZ_JALGQY010000057.1	A. lwoffii	unnamed1	Rep	rP-T23	-	6259	K1	SAMN27057513	Europe	Slovakia	Mud	Environment	2010	None	-	No
NZ_CP028556.1	Acinetobacter sp.	p1_010045	Rep	rP-T21	-	7547	WCHA45	SAMN07138955	Asia	China	Sewage	Waste water	2015	None	-	No
NZ_CP061632.1	A. seifertii	pAS47-3	Rep	rP-T1	-	74124	AS47	SAMN16092227	Asia	Taiwan	Blood	Clinical	2010-2017	Carbapenem	blaOXA-115	No
NZ_CP094549.1	Acinetobacter sp.	pYH16056-4	Rep	rP-T15	-	8140	YH16056_T	SAMN26992904	Asia	China	Soil	Environment	2016	None	-	No
NZ_CP087345.1	A. baumannii	p1DB007	Rep	rP-T1	-	70098	DB007	SAMN23078449	Europe	Germany	Human	Clinical	nr	Aminoglycoside	aphA6	No
NZ_CP068179.1	A. ursingii	unnamed4	Rep	rP-T5	-	4721	FDAARGOS_1096	SAMN16357265	Europe	Germany	Unknown	Unknown	nr	None	-	No
NZ_CP061645.1	A. seifertii	pAS40-5	Rep	rP-T7	-	3859	AS40	SAMN16092224	Asia	Taiwan	Blood	Clinical	2010-2017	None	-	No
NZ_CP087371.1	A. baumannii	p1DB004	Rep	rP-T1	-	70098	DB004	SAMN23078446	Europe	Germany	Human	Clinical	nr	Aminoglycoside	aphA6	No
NZ_JABAGU010000009.1	Acinetobacter sp003711395	pAJ1_6	Rep	rP-T24	-	6358	AJ-1	SAMN14564659	Asia	China	Cow	Animal	2018	None	-	No
NZ_CP079901.1	A. haemolyticus	unnamed1	Rep	rP-T8	-	5017	FDAARGOS_1392	SAMN16357534	Europe	Germany	Unknown	Unknown	nr	None	-	No
NZ_CP061643.1	A. seifertii	pAS40-3	Rep	rP-T1	-	74127	AS40	SAMN16092224	Asia	Taiwan	Blood	Clinical	2010-2017	Carbapenem	blaOXA-115	No
NC_025121.1	Acinetobacter sp.	pM131-4	Rep	rP-T9	-	9353	M131	SAMN14226306	Unknown	Unknown	Unknown	Unknown	nr	None	-	No
NZ_CP107606.1	A. baumannii	unnamed1	Rep	rP-T1	-	67019	1326924-1	SAMN30898357	North America	USA	Environment	Environment	2018	None	-	No
NZ_CP061831.1	A. seifertii	pAS42-3	Rep	rP-T7	-	3857	AS42	SAMN16092226	Asia	Taiwan	Blood	Clinical	2010-2017	None	-	No
NZ_CP061616.1	A. seifertii	pAS51-3	Rep	rP-T3	-	66816	AS51	SAMN16092230	Asia	Taiwan	Blood	Clinical	2010-2017	None	-	No
NZ_CP109837.1	A. baumannii	pZ198-1	Rep	rP-T1	-	72256	Z198	SAMN31277299	Asia	China	Cerebrospinal fluid	Clinical	2022	None	-	No
NZ_JACGEE010000028.1	A. nosocomialis	pAC13-2	Rep	rP-T10	-	4862	AC13	SAMN15636488	Asia	Malaysia	Wound	Clinical	2011	None	-	No
NZ_CP110467.1	A. baumannii	pRBH2-5	Rep	rP-T1	-	124107	RBH2	SAMN31494247	Pacific	Australia	Human	Clinical	1999	Carbapenem	blaOXA-23	No
NZ_CP044473.1	A. schindleri	pHZE23-1-10	Rep	rP-T11	-	4226	HZE23-1	SAMN12478518	Asia	China	Goose faeces	Animal	2018	None	-	No
NZ_CP028571.1	A. pittii	p3_005046	Rep	rP-T17	-	4771	WCHAP005046	SAMN08364583	Asia	China	Human	Clinical	nr	None	-	No
NZ_CP106989.1	A. baumannii	pNY13623-1	Rep	rP-T1	-	67024	NY13623	SAMN31100588	Unknown	Unknown	Sputum	Clinical	nr	None	-	No
CP115627.1	A. baumannii	unnamed1	Rep	rP-T1	-	71598	2022CK-00185	SAMN27182072	North America	USA	Unknown	Unknown	2022	None	-	No
NZ_CP087314.1	A. baumannii	p2OC059	Rep	rP-T1	-	70100	OC059	SAMN23078459	Europe	Germany	Human	Clinical	nr	Aminoglycoside	aphA6	No
NZ_JADDYQ010000099.1	A. johnsonii	unnamed1	Rep	rP-T14	-	4940	RB2-047	SAMN16402263	Europe	Slovakia	Gold mine Soil	Environment	2017	None	-	No
NZ_CP032008.1	A. haemolyticus	pAhaem11616a	Rep	rP-T8	-	5017	11616	SAMN09927968	North America	Mexico	Blood	Clinical	2012	None	-	No
NZ_CP061619.1	A. seifertii	pAS51-6	Rep	rP-T7	-	3858	AS51	SAMN16092230	Asia	Taiwan	Blood	Clinical	2010-2017	None	-	No
NZ_CP094551.1	Acinetobacter sp.	pYH16056-6	Rep	rP-T16	-	6446	YH16056_T	SAMN26992904	Asia	China	Soil	Environment	2016	None	-	No
NZ_CP087352.1	A. baumannii	p1DB003	Rep	rP-T1	-	70098	DB003	SAMN23078445	Europe	Germany	Human	Clinical	nr	Aminoglycoside	aphA6	No
NZ_CP106944.1	A. baumannii	pARC6851_1	Rep	rP-T1	-	79290	ARC6851	SAMN31037892	Europe	Greece	Urine	Clinical	2017	Multiple including carbapenem	aphA6, blaOXA-23	No
NZ_CP087358.1	A. baumannii	p1OC041	Rep	rP-T1	-	91713	OC041	SAMN23078456	Europe	Germany	Human	Clinical	nr	Aminoglycoside	aph(3')-VIb	No
NZ_JACGEF010000029.1	A. nosocomialis	pAC15-2	Rep	rP-T10	-	4862	AC15	SAMN15636491	Asia	Malaysia	Wound	Clinical	2011	None	-	No
NZ_CP061639.1	A. seifertii	pAS41-5	Rep	rP-T7	-	3857	AS41	SAMN16092225	Asia	Taiwan	Blood	Clinical	2010-2017	None	-	No
NZ_CP032001.1	A. haemolyticus	pAhaemINNSZ174a	Rep	rP-T8	-	5017	INNSZ174	SAMN09927969	North America	Mexico	Clinical	Clinical	1998	None	-	No
NZ_CP048668.1	A. piscicola	pYH12207-9	Rep	rP-T32	-	7423	YH12207_T	SAMN13979601	Asia	China	Pig faeces	Animal	2017	None	-	No
NZ_CP061595.1	A. seifertii	pAS60-3	Rep	rP-T7	-	3857	AS60	SAMN16092236	Asia	Taiwan	Blood	Clinical	2010-2017	None	-	No
NZ_CP061677.1	A. seifertii	pAS17-2	Rep	rP-T1	-	74124	AS17	SAMN16092215	Asia	Taiwan	Blood	Clinical	2010-2017	Carbapenem	blaOXA-115	No
CP115630.1	A. baumannii	unnamed1	Rep	rP-T1	-	71233	2022CK-00337	SAMN28788563	North America	USA	Sputum	Clinical	2022	None	-	No
NZ_CP104787.1	A. baumannii	punamed1	Rep	rP-T1	-	71276	Ab-3556	SAMN30929087	Unknown	Unknown	Sputum	Clinical	2017	None	-	No
NZ_CP061585.1	A. seifertii	pAS62-3	Rep	rP-T1	-	74124	AS62	SAMN16092238	Asia	Taiwan	Blood	Clinical	2010-2017	Carbapenem	blaOXA-115	No
NZ_CP094261.1	A. indicus	pBDT201-3	Rep	rP-T13	-	70604	BDT201	SAMN26688272	Asia	China	Pig	Animal	2020	Tetracycline	tet(X)	No
NZ_CP104909.1	A. baumannii	punamed1	Rep	rP-T1	-	71276	YZM-0314	SAMN30929355	Unknown	Unknown	Blood	Clinical	2017	None	-	No
NZ_CP061637.1	A. seifertii	pAS41-3	Rep	rP-T1	-	74127	AS41	SAMN16092225	Asia	Taiwan	Blood	Clinical	2010-2017	Carbapenem	blaOXA-115	No
NZ_CP089050.1	A. ursingii	pRIVM_C010761_7	Rep	rP-T8	-	5033	RIVM_C010761	SAMN23563198	Europe	Netherlands	Human	Clinical	2016	None	-	No
NZ_CP016901.1	A. soli	pGFJ5	Rep	rP-T19	-	5086	GFJ2	SAMN05554081	Asia	Thailand	Soil	Environment	2011	None	-	No
NZ_CP087366.1	A. baumannii	p1DB005	Rep	rP-T1	-	70098	DB005	SAMN23078447	Europe	Germany	Human	Clinical	nr	Aminoglycoside	aphA6	No
NZ_CP055280.1	Acinetobacter sp.	pBspH12	Rep	rP-T27	-	6813	NEB 394	SAMN15195663	North America	USA	Soil	Environment	1986	None	-	No
NZ_CP087299.1	A. baumannii	p1OC070	Rep	rP-T1	-	83611	OC070	SAMN23078463	Europe	Germany	Human	Clinical	nr	Multiple	sul1, strA, strB, aadA2, aphA6, aac(6')-Ib3, aadB, blaGES-14, cmlA1, dfrA7	No
NZ_CP033857.1	Acinetobacter sp.	unnamed1	Rep	rP-T1	-	67023	FDAARGOS_493	SAMN10163169	Unknown	Unknown	Human	Clinical	nr	None	-	No
NC_010606.1	A. baumannii	pACICU1	Rep	rP-T1	-	64366	ACICU	SAMN02603140	Europe	Italy	Cerebrospinal fluid	Clinical	2005	None	-	Yes
AEOY01000095.1	A. baumannii	p1ABST2	Rep	rP-T1	-	63320	3990	SAMN02471598	Europe	Italy	unknown	Environment	2006	None	-	Yes
AFDB02000004.1	A. baumannii	pNaval81-67	Rep	rP-T1	-	67012	Naval-81	SAMN00114928	North America	USA	unknown	Environment	2006	None	-	Yes
AFDL01000006.1	A. baumannii	pOIFC143-70	Rep	rP-T1	-	69518	OIFC143	SAMN02436631	North America	USA	unknown	Unknown	2003	None	-	Yes
ALII01000020.1	A. baumannii	pIS123-67	Rep	rP-T1	-	67025	IS-123	SAMN02436485	Middle East	Iraq	unknown	Clinical	2009	None	-	Yes
AP023078.1	A. baumannii	pOCU_Ac16a_1	Rep	rP-T1	-	73028	OCU_Ac16a	SAMD00059694	Asia	Japan	tracheal aspirate	Clinical	2015	None	-	Yes
AYOH01000010.2	A. baumannii	pABUH1-74	Rep	rP-T1	-	74089	UH9907	SAMN02597375	North America	USA	sputum	Clinical	2007	Multiple including carbapenem	aphA6, blaOXA-23	Yes
CM009039.2	A. baumannii	p2ZQ6	Rep	rP-T4	-	6772	ZQ6	SAMN08093365	Middle East	Iraq	wound swab	Clinical	2016	None	-	Yes
CM009084.2	A. baumannii	p2ZQ9	Rep	rP-T1	-	62339	ZQ1	SAMN08043814	Middle East	Iraq	wound swab	Clinical	2016	None	-	Yes
CM009650.1	A. baumannii	p4ZQ3	Rep	rP-T1	-	68115	ZQ3	SAMN08093362	Middle East	Iraq	blood	Clinical	2016	None	-	Yes
CP000865.1	A. baumannii	pACICU2	Rep	rP-T1	-	64366	ACICU	SAMN02603140	Europe	Italy	blood	Clinical	2001	None	-	Yes
CP001922.1	A. baumannii	ABKp1	Rep	rP-T1	-	74451	1656-2	SAMN02603494	Asia	South Korea	clinical	Clinical	2004	None	-	Yes
CP002524.1	A. baumannii	p2ABTCDC0715	Rep	rP-T1	-	70894	TCDC-AB0715	SAMN02603891	Asia	Taiwan	bacteremia	Clinical	2007-2009	None	-	Yes
CP003501.1	A. baumannii	pABTJ1	Rep	rP-T2	-	77528	MDR-TJ	SAMN02603104	Asia	China	clinical	Clinical	2012	Carbapenem	blaOXA-23	Yes
CP003887.1	A. baumannii	p1BJAB07104	Rep	rP-T2	-	70170	BJAB07104	SAMN02604244	Asia	China	blood	Clinical	2007-2008	None	-	Yes
CP003888.1	A. baumannii	p2BJAB0868	Rep	rP-T2	-	70167	BJAB0868	SAMN02604246	Asia	China	ascites	Clinical	2007-2008	None	-	Yes
CP007580.1	A. baumannii	pAC30c	Rep	rP-T1	-	71433	AC30	SAMN02471421	Asia	Malaysia	endotracheal secretion	Clinical	2011	None	-	Yes
CP008707.1	A. baumannii	p1AB5075	Rep	rP-T1	-	83610	AB5075-UW	SAMN02894434	North America	USA	tibia/osteomyelitis of diabetes patient	Clinical	2008	Multiple	sul1, dfrA7, aacA4, blaGES-11, strA, strB, aadA2, cmlA1, aadB, aphA6	Yes
CP008851.1	A. baumannii	pAC29b	Rep	rP-T1	-	74749	AC29	SAMN02714232	Asia	Malaysia	endotracheal secretion	Clinical	2011	Carbapenem	blaOXA-23	Yes
CP012008.1	A. baumannii	pAB04-2	Rep	rP-T1	-	87569	Ab04-mff	SAMN03817045	North America	Canada	blood	Clinical	2012	Carbapenem	blaOXA-23	Yes
CP013925.1	A. baumannii	pKBN10P02143	Rep	rP-T3	-	52517	KBN10P02143	SAMN03941550	Asia	South Korea	pus	Clinical	2012	None	-	Yes
CP014216.1	A. baumannii	p2YU-R612	Rep	rP-T1	-	74241	YU-R612	SAMN04448797	Asia	South Korea	sputum	Clinical	2014	None	-	Yes
CP014292.1	A. baumannii	p2AB34299	Rep	rP-T1	-	84967	AB34299	SAMN04457967	North America	USA	nosocomial infection	Clinical	2015	Aminoglycoside	aphA6	Yes
CP015366.1	A. baumannii	pAba3207b	Rep	rP-T1	-	80546	3207	SAMN04485290	North America	Mexico	Bronchial fluid	Clinical	2008	None	-	Yes
CP016297.1	A. baumannii	pCMCVTAb2-Ab4	Rep	rP-T1	-	74090	CMC-CR-MDR-Ab4	SAMN04096368	North America	USA	BAL	Clinical	2009	Multiple including carbapenem	aphA6, blaOXA-23	Yes
CP016302.1	A. baumannii	pCMCVTAb2-Ab66	Rep	rP-T1	-	73188	CMC-CR-MDR-Ab66	SAMN04096370	North America	USA	TA	Clinical	2010	Carbapenem	blaOXA-23	Yes
CP017645.1	A. baumannii	pKAB02	Rep	rP-T1	-	81227	KAB02	SAMN05601667	Asia	South Korea	Bronchial	Clinical	2015	None	-	Yes
CP017647.1	A. baumannii	pKAB03	Rep	rP-T1	-	73891	KAB03	SAMN05601668	Asia	South Korea	sputum	Clinical	2015	None	-	Yes
CP017649.1	A. baumannii	pKAB04	Rep	rP-T1	-	121485	KAB04	SAMN05601669	Asia	South Korea	sputum	Clinical	2015	None	-	Yes
CP017651.1	A. baumannii	pKAB05	Rep	rP-T1	-	70884	KAB05	SAMN05601670	Asia	South Korea	blood	Clinical	2015	None	-	Yes
CP017653.1	A. baumannii	pKAB06	Rep	rP-T1	-	70884	KAB06	SAMN05601671	Asia	South Korea	wound	Clinical	2015	None	-	Yes
CP017655.1	A. baumannii	pKAB07	Rep	rP-T1	-	72073	KAB07	SAMN05601672	Asia	South Korea	sputum	Clinical	2015	None	-	Yes
CP017657.1	A. baumannii	pKAB08	Rep	rP-T1	-	101406	KAB08	SAMN05601673	Asia	South Korea	wound	Clinical	2015	None	-	Yes
CP018144.1	A. baumannii	pHRAB-85	Rep	rP-T2	-	77513	HRAB-85	SAMN06046790	Asia	China	sputum	Clinical	2014	Carbapenem	blaOXA-23	Yes
CP018422.1	A. baumannii	pBJ83	Rep	rP-T2	-	69069	XDR-BJ83	SAMN06109232	Asia	China	medical patient	Clinical	2007	None	-	Yes
CP019115.1	A. baumannii	pMDR-CQ	Rep	rP-T1	-	75390	MDR-CQ	SAMN06211572	Asia	China	unknown	Clinical	2016	None	-	Yes
CP020573.1	A. baumannii	p15A5_1	Rep	rP-T1	-	74241	15A5	SAMN06650264	Asia	South Korea	Pulmonary	Clinical	2013	None	-	Yes
CP020577.1	A. baumannii	pSSA12_1	Rep	rP-T1	-	73264	SSA12	SAMN06650263	Asia	South Korea	blood	Clinical	2013	None	-	Yes
CP020580.1	A. baumannii	pSSMA17_1	Rep	rP-T1	-	90973	SSMA17	SAMN06650261	Asia	South Korea	Bronchial washing fluid	Clinical	2013	None	-	Yes
CP020582.1	A. baumannii	pJBA13_1	Rep	rP-T1	-	90972	JBA13	SAMN06650260	Asia	South Korea	sputum	Clinical	2013	None	-	Yes
CP020589.1	A. baumannii	p15A34_1	Rep	rP-T1	-	72076	15A34	SAMN06650243	Asia	South Korea	Pulmonary	Clinical	2014	None	-	Yes
CP020593.1	A. baumannii	pUSA2_1	Rep	rP-T1	-	74241	USA2	SAMN06650241	Asia	South Korea	urine	Clinical	2013	None	-	Yes
CP020594.1	A. baumannii	pUSA15_1	Rep	rP-T1	-	98301	USA15	SAMN06650240	Asia	South Korea	sputum	Clinical	2013	Multiple including carbapenem	aphA6, blaOXA-23	Yes
CP021322.1	A. baumannii	pXH731	Rep	rP-T1	-	64557	XH731	SAMN07135563	Asia	China	unknown	Clinical	2017	None	-	Yes
CP021787.1	A. baumannii	pA85-3	Rep	rP-T1	-	86334	A85	SAMN07125723	Pacific	Australia	sputum	Clinical	2003	Carbapenem	blaOXA-23	Yes
CP023028.1	A. baumannii	pAba10042b	Rep	rP-T1	-	110728	10042	SAMN07520233	North America	Mexico	secretion	Clinical	2011	Aminoglycoside	aphA6	Yes
CP023030.1	A. baumannii	pAba9102a	Rep	rP-T1	-	95206	9102	SAMN07520232	North America	Mexico	Bronchial fluid	Clinical	2010	Aminoglycoside	aphA6	Yes
CP023033.1	A. baumannii	pAba7847b	Rep	rP-T1	-	80546	7847	SAMN07284119	North America	Mexico	blood	Clinical	2008	None	-	Yes
CP024578.1	A. baumannii	pAbPK1b	Rep	rP-T1	-	79335	AbPK1	SAMN07945345	Asia	Pakistan	sheep brocho-alveolar lavage	Animal	2012	Multiple including carbapenem	blaOXA-23, aphA6	Yes
CP025267.1	A. baumannii	pSMC_AB_BL01_1	Rep	rP-T1	-	74241	SMC_Paed_Ab_BL01	SAMN08054861	Asia	South Korea	blood	Clinical	2012	None	-	Yes
CP026706.1	A. baumannii	CP026706.1	Rep	rP-T1	-	72105	AR_0056	SAMN04014897	North America	USA	clinical	Clinical	nr	Carbapenem	blaOXA-23	Yes
CP026712.1	A. baumannii	CP026712.1	Rep	rP-T1	-	72990	AR_0063	SAMN04014904	North America	USA	clinical	Clinical	nr	Carbapenem	blaOXA-23	Yes
CP026946.1	A. baumannii	pAbS1_03	Rep	rP-T1	-	72204	S1	SAMN07977762	North America	USA	BAL	Clinical	2007	Carbapenem	blaOXA-23	Yes
CP027243.1	A. baumannii	p1_005078	Rep	rP-T1	-	70796	WCHAB005078	SAMN08364584	Asia	China	unknown	Unknown	nr	None	-	Yes
CP029571.1	A. baumannii	pDA33098-71	Rep	rP-T1	-	71234	DA33098	SAMN09241862	Europe	Spain	clinical	Clinical	nr	Aminoglycoside	aphA6	Yes
CP030109.1	A. baumannii	pDA33382-85	Rep	rP-T1	-	84678	DA33382	SAMN09460321	Europe	Germany	Tracheal secretion	Clinical	nr	Multiple including carbapenem	aphA6, blaOXA-164	Yes
CP031382.1	A. baumannii	pACICU2	Rep	rP-T1	-	70101	ACICU	SAMN09302593	Europe	Italy	cerebrospinal fluid	Clinical	2005	Aminoglycoside	aphA6	Yes
CP033245.1	A. baumannii	pAba7835b	Rep	rP-T1	-	80584	7835	SAMN07520235	North America	Mexico	tissue	Clinical	2007	None	-	Yes
CP035047.1	A. baumannii	p74.1Kbp	Rep	rP-T1	-	74091	ABUH793	SAMN05238672	North America	USA	sputum	Clinical	2015	Multiple including carbapenem	blaOXA-23, aphA6	Yes
CP036286.1	A. baumannii	p60155_3	Rep	rP-T1	-	71234	TG60155	SAMN10261590	North America	USA	sputum	Clinical	2013	None	-	Yes
CP038264.1	A. baumannii	pEC_gr6	Rep	rP-T1	-	76956	LEV1449/17Ec	SAMN10386510	Europe	Czech Republic	frozen liver	Clinical	2018	None	-	Yes
CP039994.1	A. baumannii	pTG22182_1	Rep	rP-T1	-	71233	TG22182	SAMN10261544	North America	USA	Tracheal aspirate	Clinical	2011	None	-	Yes
CP040043.1	A. baumannii	p3VB958	Rep	rP-T1	-	82500	VB958	SAMN11554497	Asia	India	blood	Clinical	2019	None	-	Yes
CP042563.1	A. baumannii	pE47_007	Rep	rP-T5	-	4715	E47	SAMN12289292	Pacific	Australia	Hospital surfaces	Clinical	2013	None	-	Yes
CP042842.1	A. baumannii	pATCCBAA-1790	Rep	rP-T1	-	67023	ATCC BAA-1790	SAMN12399660	North America	USA	sputum	Clinical	2008	None	-	Yes
CP048134.1	A. baumannii	pD46-3	Rep	rP-T1	-	74916	D46	SAMN13874778	Pacific	Australia	UTI	Clinical	2010	Multiple including carbapenem	blaOXA-23, aphA6	Yes
CP050392.1	A. baumannii	pVB11737_1	Rep	rP-T1	-	70712	VB11737	SAMN14410107	Asia	India	blood	Clinical	2019	Aminoglycoside	aphA6	Yes
CP050404.1	A. baumannii	pVB2486_1	Rep	rP-T1	-	99090	VB2486	SAMN14414761	Asia	India	sputum	Clinical	2019	Carbapenem	blaOXA-23	Yes
CP050413.1	A. baumannii	pPM192696_1	Rep	rP-T1	-	70098	PM192696	SAMN14420253	Asia	India	sputum	Clinical	2019	Aminoglycoside	aphA6	Yes
CP050909.1	A. baumannii	p2DT-Ab022	Rep	rP-T1	-	71194	DT-Ab022	SAMN14308866	Asia	China	sputum	Clinical	2017	None	-	Yes
CP050912.1	A. baumannii	p2DT-Ab020	Rep	rP-T1	-	71194	DT-Ab020	SAMN14308864	Asia	China	sputum	Clinical	2018	None	-	Yes
CP050915.1	A. baumannii	pDT-Ab007	Rep	rP-T1	-	92021	DT-Ab007	SAMN14308853	Asia	China	sputum	Clinical	2017	None	-	Yes
CP050917.1	A. baumannii	p2DT-Ab003	Rep	rP-T1	-	71194	DT-Ab003	SAMN14308849	Asia	China	stethoscope	Clinical	2017	None	-	Yes
CP059390.1	A. baumannii	p4.36-1512	Rep	rP-T5	-	4721	36-1512	SAMN15541804	Europe	Russia	respiratory tract	Clinical	2016	None	-	Yes
CP059554	A. seifertii	p2E-022166	Rep	rP-T19	-	5078	E-022166	SAMN15646566	Europe	Finland	Brewery	Environment	nr	None	-	No
CP061516.1	A. baumannii	pCFSAN093710_2	Rep	rP-T1	-	83626	CFSAN093710	SAMN12391854	North America	USA	sterile body site	Clinical	2005	None	-	Yes
CP061713.1	A. baumannii	p1E072658	Rep	rP-T6	-	4483	E-072658	SAMN15646565	Europe	Finland	paper pulp mill	Environment	2009	None	-	Yes
CP062921.1	A. baumannii	p3Res13-Abat	Rep	rP-T1	-	72831	Res13-Abat-PEA21-P4-01-A	SAMN16304032	North America	Canada	swab	Clinical	2018	None	-	Yes
CP066230.1	A. baumannii	pG20AB011-1	Rep	rP-T1	-	73339	G20AB011	SAMN17073618	Asia	South Korea	blood	Clinical	2020	None	-	Yes
CP066233.1	A. baumannii	pG20AB010-1	Rep	rP-T1	-	73360	G20AB010	SAMN17073617	Asia	South Korea	blood	Clinical	2020	None	-	Yes
CP066236.1	A. baumannii	pG20AB009-1	Rep	rP-T1	-	73361	G20AB009	SAMN17073616	Asia	South Korea	blood	Clinical	2020	None	-	Yes
CP066238.1	A. baumannii	pG20AB007-1	Rep	rP-T1	-	73361	G20AB007	SAMN17073615	Asia	South Korea	blood	Clinical	2020	None	-	Yes
CP069841.1	A. baumannii	p2FDAARGOS_1360	Rep	rP-T1	-	76933	FDAARGOS_1360	SAMN16357502	North America	USA	unknown	Unknown	nr	Multiple including carbapenem	aphA6, blaOXA-23	Yes
CP072124.1	A. baumannii	p2KSK1	Rep	rP-T1	-	87529	KSK1	SAMN18396008	Asia	India	respiratory specimen	Clinical	2020	Multiple including carbapenem	blaOXA-23, aphA6	Yes
CP072272.1	A. baumannii	p2KSK6	Rep	rP-T1	-	68224	KSK6	SAMN18452234	Asia	India	respiratory specimen	Clinical	2020	Aminoglycoside	aphA6	Yes
CP072277.1	A. baumannii	p2KSK7	Rep	rP-T1	-	68225	KSK7	SAMN18452334	Asia	India	respiratory specimen	Clinical	2020	Aminoglycoside	aphA6	Yes
CP072282.1	A. baumannii	p2KSK10	Rep	rP-T1	-	87529	KSK10	SAMN18452342	Asia	India	respiratory specimen	Clinical	2020	Multiple including carbapenem	blaOXA-23, aphA6	Yes
CP072287.1	A. baumannii	p2KSK11	Rep	rP-T1	-	87529	KSK11	SAMN18452659	Asia	India	respiratory specimen	Clinical	2020	Multiple including carbapenem	blaOXA-23, aphA6	Yes
CP072292.1	A. baumannii	p2KSK18	Rep	rP-T1	-	68225	KSK18	SAMN18452698	Asia	India	respiratory specimen	Clinical	2020	Aminoglycoside	aphA6	Yes
CP072297.1	A. baumannii	p2KSK19	Rep	rP-T1	-	87529	KSK19	SAMN18452699	Asia	India	respiratory specimen	Clinical	2020	Multiple including carbapenem	blaOXA-23, aphA6	Yes
CP072302.1	A. baumannii	p2KSK20	Rep	rP-T1	-	68309	KSK20	SAMN18452712	Asia	India	respiratory specimen	Clinical	2020	Aminoglycoside	aphA6	Yes
CP072400.1	A. baumannii	p2KSK2	Rep	rP-T1	-	87529	KSK2	SAMN18451305	Asia	India	respiratory specimen	Clinical	2020	Multiple including carbapenem	blaOXA-23, aphA6	Yes
CP076802.1	A. baumannii	p1UC25604	Rep	rP-T1	-	88371	UC25604	SAMN19356555	South America	Chile	peritoneal abscess	Clinical	2012	Carbapenem	blaOXA-23	Yes
CP076805.1	A. baumannii	p1UC24371	Rep	rP-T1	-	105056	UC24371	SAMN19356554	South America	Chile	endotracheal aspirate	Clinical	2011	Carbapenem	blaOXA-23	Yes
CP076818.1	A. baumannii	p1UC24137	Rep	rP-T1	-	99399	UC24137	SAMN19356530	South America	Chile	sacrum ulcer	Clinical	2011	Multiple including carbapenem	aadB, floR, sul2, blaOXA-23	Yes
CP077833.1	A. baumannii	pDETAB7d	Rep	rP-T1	-	84262	DETAB-P43	SAMN19774606	Asia	China	Nasojejunal tube	Clinical	2019	None	-	Yes
CP077836.1	A. baumannii	pDETAB7b	Rep	rP-T1	-	73444	DETAB-P65	SAMN19774628	Asia	China	Rectal swab	Clinical	2019	None	-	Yes
CP077838.1	A. baumannii	pDETAB7a	Rep	rP-T1	-	72258	DETAB-E159	SAMN19762636	Asia	China	Locker	Clinical	2019	None	-	Yes
CP077841.1	A. baumannii	pDETAB16	Rep	rP-T1	-	70789	DETAB-P90	SAMN19774653	Asia	China	Rectal swab	Clinical	2019	None	-	Yes
CP077847.1	A. baumannii	pDETAB8	Rep	rP-T1	-	70426	DETAB-P24	SAMN19774588	Asia	China	Nasojejunal tube	Clinical	2019	None	-	Yes
CP080455.1	A. baumannii	pMRSN56-3	Rep	rP-T4	-	6772	MRSN 56	SAMN19955388	North America	USA	Hip	Clinical	2010	None	-	Yes
CP082219.1	A. baumannii	p2018BJAB2	Rep	rP-T1	-	78023	2018BJAB2	SAMN15538706	Asia	China	lung	Clinical	2018	Carbapenem	blaOXA-23	Yes
CP082220.1	A. baumannii	p2018BJAB1	Rep	rP-T1	-	78024	2018BJAB1	SAMN15538705	Asia	China	sputum	Clinical	2018	Carbapenem	blaOXA-23	Yes
CP082221.1	A. baumannii	p2018TJAB1	Rep	rP-T1	-	78022	2018TJAB1	SAMN15538704	Asia	China	blood	Clinical	2018	Carbapenem	blaOXA-23	Yes
CP082222.1	A. baumannii	p2014TJAB1	Rep	rP-T2	-	77531	2014TJAB1	SAMN15538703	Asia	China	blood	Clinical	2014	Carbapenem	blaOXA-23	Yes
CP082225.1	A. baumannii	p2014BJAB1	Rep	rP-T2	-	77530	2014BJAB1	SAMN15538700	Asia	China	sputum	Clinical	2016	Carbapenem	blaOXA-23	Yes
CP082226.1	A. baumannii	p2016BJAB1	Rep	rP-T1	-	77943	2016BJAB1	SAMN15538699	Asia	China	sputum	Clinical	2016	Carbapenem	blaOXA-23	Yes
CP082228.1	A. baumannii	p2018HLJAB2	Rep	rP-T1	-	78030	2018HLJAB2	SAMN15538697	Asia	China	abdominal fluid	Clinical	2018	Carbapenem	blaOXA-23	Yes
CP082889.1	A. baumannii	p2014LNAB1-2	Rep	rP-T2	-	77537	2014LNAB1	SAMN15538702	Asia	China	sputum	Clinical	2016	Carbapenem	blaOXA-23	Yes
CP082892.1	A. baumannii	p2016LNAB1-2	Rep	rP-T2	-	77530	2016LNAB1	SAMN15538701	Asia	China	cerebrospinal fluid	Clinical	2016	None	-	Yes
CP082895.1	A. baumannii	p2018HBAB1-2	Rep	rP-T1	-	78023	2018HBAB1	SAMN15538698	Asia	China	abdominal fluid	Clinical	2018	Carbapenem	blaOXA-23	Yes
CP084723.1	A. baumannii	pHKU7b	Rep	rP-T1	-	69524	HKU7	SAMN22202746	Asia	Hong Kong	Hospital environment	Clinical	2020	None	-	Yes
CP084726.1	A. baumannii	pHKU6b	Rep	rP-T1	-	69524	HKU6	SAMN22202745	Asia	Hong Kong	Hospital environment	Clinical	2020	None	-	Yes
CP084729.1	A. baumannii	pHKU5b	Rep	rP-T1	-	69524	HKU5	SAMN22202744	Asia	Hong Kong	Hospital environment	Clinical	2020	None	-	Yes
CP084732.1	A. baumannii	pHKU4b	Rep	rP-T1	-	69524	HKU4	SAMN22202743	Asia	Hong Kong	Hospital environment	Clinical	2020	None	-	Yes
CP084735.1	A. baumannii	pHKU3b	Rep	rP-T1	-	69524	HKU3	SAMN22202742	Asia	Hong Kong	Hospital environment	Clinical	2020	None	-	Yes
CP091595.1	A. baumannii	pR32_2	Rep	rP-T1	-	73145	Nord4-2	SAMN25263435	Europe	Germany	unknown	Unknown	2018	None	-	Yes
CP094285.1	A. baumannii	pNY5301-2	Rep	rP-T1	-	71194	NY5301	SAMN26814682	Asia	China	abdominal fluid	Clinical	2018	None	-	Yes
CP096689.1	A. baumannii	p5840	Rep	rP-T1	-	73209	5840	SAMN24114684	Asia	China	blood	Clinical	2018	None	-	Yes
CP096691.1	A. baumannii	p5839	Rep	rP-T1	-	71277	5839	SAMN24114683	Asia	China	blood	Clinical	2018	None	-	Yes
CP096695.1	A. baumannii	p5773_2	Rep	rP-T2	-	78842	5773	SAMN24114679	Asia	China	secretion	Clinical	2012	Carbapenem	blaOXA-23	Yes
CP096703.1	A. baumannii	p5767	Rep	rP-T2	-	70287	5767	SAMN24114675	Asia	China	blood	Clinical	2012	None	-	Yes
CP096706.1	A. baumannii	p5761	Rep	rP-T1	-	71277	5761	SAMN24114673	Asia	China	blood	Clinical	2012	None	-	Yes
CP096708.1	A. baumannii	p5760_1	Rep	rP-T2	-	77531	5760	SAMN24114672	Asia	China	sputum	Clinical	2012	Carbapenem	blaOXA-23	Yes
CP096712.1	A. baumannii	p5759_2	Rep	rP-T2	-	77531	5759	SAMN24114671	Asia	China	brocho-alveolar lavage	Clinical	2012	Carbapenem	blaOXA-23	Yes
CP096716.1	A. baumannii	p5745_2	Rep	rP-T2	-	77530	5745	SAMN24114670	Asia	China	abdominal fluid	Clinical	2011	Carbapenem	blaOXA-23	Yes
CP096719.1	A. baumannii	p5741_2	Rep	rP-T1	-	70793	5741	SAMN24114669	Asia	China	sputum	Clinical	2010	None	-	Yes
CP096725.1	A. baumannii	p5734_1	Rep	rP-T2	-	77534	5734	SAMN24114666	Asia	China	blood	Clinical	2010	Carbapenem	blaOXA-23	Yes
CP096730.1	A. baumannii	p5729	Rep	rP-T2	-	77542	5729	SAMN24114664	Asia	China	secretion	Clinical	2010	Carbapenem	blaOXA-23	Yes
CP096733.1	A. baumannii	p5689_2	Rep	rP-T2	-	71479	5689	SAMN24114663	Asia	China	blood	Clinical	2016	None	-	Yes
CP096736.1	A. baumannii	p5683_1	Rep	rP-T2	-	77540	5683	SAMN24114661	Asia	China	blood	Clinical	2016	Carbapenem	blaOXA-23	Yes
CP096739.1	A. baumannii	p5679	Rep	rP-T1	-	73209	5679	SAMN24114660	Asia	China	blood	Clinical	2014	None	-	Yes
CP096744.1	A. baumannii	p5671_2	Rep	rP-T1	-	71278	5671	SAMN24114657	Asia	China	blood	Clinical	2013	None	-	Yes
CP096751.1	A. baumannii	p5666_2	Rep	rP-T2	-	77530	5666	SAMN24114654	Asia	China	blood	Clinical	2016	Carbapenem	blaOXA-23	Yes
CP096754.1	A. baumannii	p5664	Rep	rP-T1	-	71044	5664	SAMN24114652	Asia	China	blood	Clinical	2014	None	-	Yes
CP096756.1	A. baumannii	p5663	Rep	rP-T1	-	71044	5663	SAMN24114651	Asia	China	blood	Clinical	2014	None	-	Yes
CP096763.1	A. baumannii	p5651	Rep	rP-T1	-	72248	5651	SAMN24114647	Asia	China	sputum	Clinical	2005	None	-	Yes
CP096769.1	A. baumannii	p5388_1	Rep	rP-T2	-	77533	5388	SAMN24114644	Asia	China	blood	Clinical	2016	Carbapenem	blaOXA-23	Yes
CP099785.1	A. baumannii	pNCCP15989*	Rep	rP-T1	-	75310	NCCP 15989	SAMN29272488	Asia	South Korea	sputum	Clinical	2013	None	-	Yes
CP099787.1	A. baumannii	pNCCP15992	Rep	rP-T1	-	72095	NCCP 15992	SAMN29272847	Asia	South Korea	unknown	Clinical	2013	None	-	Yes
CP099791.1	A. baumannii	p1NCCP15996*	Rep	rP-T1	-	73034	NCCP 15996	SAMN29325381	Asia	South Korea	urine	Clinical	2013	None	-	Yes
CP100306.1	A. baumannii	p1KBN10P05679	Rep	rP-T1	-	74294	KBN10P05679	SAMN29388303	Asia	South Korea	sputum	Clinical	2018	None	-	Yes
HG977523.1	A. baumannii	pCS01A	Rep	rP-T1	-	63720	CS01	SAMEA3158456	Europe	Switzerland	Cerebrospinal fluid	Clinical	nr	None	-	Yes
HG977527.1	A. baumannii	pCR17A	Rep	rP-T1	-	63795	CR17	SAMEA3158506	Europe	Switzerland	unknown	Environment	nr	None	-	Yes
JAHPZP010000021.1	A. baumannii	pAci46a	Rep	rP-T1	-	70873	Aci46	SAMN19771046	Africa	Thailand	pneumonia	Clinical	2005	None	-	Yes
KF669606.1	A. baumannii	pAb-G7-2	Rep	rP-T1	-	70100	G7	SAMN14225999	Pacific	Australia	unknown	Animal	2002	Aminoglycoside	aphA6	Yes
KF889012.1	A. baumannii	pAB_CC	Rep	rP-T1	-	65890	TYTH-1	SAMN02603667	Asia	Taiwan	unknown	Unknown	nr	None	-	Yes
KM051846.1	A. baumannii	pD72-2	Rep	rP-T1	-	70102	D72	SAMN14226465	Pacific	Australia	unknown	Unknown	2010	Aminoglycoside	aphA6	Yes
KM922672.1	A. baumannii	pAZJ221	Rep	rP-T2	-	77530	A221	SAMN03103694	Asia	China	blood	Clinical	2009	Carbapenem	blaOXA-23	Yes
KR535992.1	A. baumannii	pA105-1	Rep	rP-T1	-	70098	A105	SAMN14226627	Europe	Sweden	bronchial secretion	Clinical	2013	Aminoglycoside	aphA6	Yes
KU549175.1	A. baumannii	pC13-2	Rep	rP-T1	-	103871	C13	SAMN14227264	Pacific	Australia	unknown	Unknown	2006	Aminoglycoside	aphA6	Yes
KX230794.1	A. baumannii	pMAL-2	Rep	rP-T1	-	67025	MAL	SAMN14227145	Europe	France	urine	Animal	nr	None	-	Yes
KY022424.1	A. baumannii	pAb8098	Rep	rP-T1	-	82667	Ab8098	SAMN14227393	North Africa	Tunisia	unknown	Unknown	nr	Multiple including carbapenem	sul1, dfrA7, aacA4, blaGES-11, strB, strA, aadA2, cmlA1, aadB, ant(3'')-la, aphA6, blaOXA-58, blaOXA-58, blaOXA-58	Yes
LT984690.1	A. baumannii	p2K50	Rep	rP-T1	-	79598	K50	SAMEA104446236	Middle East	Kuwait	wound	Clinical	2008	Multiple including carbapenem	sul1, dfrA7, aacA4, blaGES-11, blaOXA-23	Yes
MG954377.1	A. baumannii	pS21-2	Rep	rP-T1	-	123432	SGH9601	SAMN14228297	Asia	Singapore	unknown	Unknown	1996	Carbapenem	blaOXA-23	Yes
MG954379.1	A. baumannii	pS32-2	Rep	rP-T1	-	70833	SGH0905	SAMN14228295	Asia	Singapore	unknown	Unknown	2009	None	-	Yes
MK243454.1	A. baumannii	pCRA914-67	Rep	rP-T1	-	66886	09A16CRGN0014	SAMN14227902	North America	Canada	clinical	Clinical	nr	None	-	Yes
MK386681.1	A. baumannii	pABAY09008_1B	Rep	rP-T1	-	74241	ABAY09008	SAMN14228691	Asia	South Korea	unknown	Unknown	nr	None	-	Yes
MK386682.1	A. baumannii	pABAY10001_1C	Rep	rP-T2	-	54627	ABAY10001	SAMN14228690	Asia	South Korea	unknown	Unknown	nr	None	-	Yes
MK531538.1	A. baumannii	pMC23.1	Rep	rP-T1	-	67441	MC23	-	South America	Bolivia	urine	Clinical	2016	None	-	Yes
NZ_CP102817.1	A. baumannii	unnamed3	Rep	rP-T1	-	88562	Ab32-VUB	SAMN25131638	Europe	Belgium	Human	Clinical	2014	Multiple including carbapenem	strAB, aadA2, aphA6, aac(6')-Ib3, aadB, blaCARB-49, blaGES-12, blaOXA-169, blaOXA-23, cmlA1, sul1, dfrA7	No
NC_010605.1	A. baumannii	pACICU1	Rep_3	r3-T1	-	28279	ACICU	SAMN02603140	Europe	Italy	Cerebrospinal fluid	Clinical	2005	Carbapenem	blaOXA-58, blaOXA-58	No
NZ_OK546135.1	A. baumannii	pAbCTX16	Rep_3	r3-T1	-	19656	AbCTX16	-	Europe	France	Stool	Clinical	2018	Carbapenem	blaOXA-72	No
NZ_MZ573927.1	A. baumannii	pLUH6050-3	Rep_3	r3-T1	-	29879	LUH6050	-	Africa	South Africa	Human	Clinical	1997-1999	Macrolide	msr(E), mph(E)	No
NZ_CP117760.1	A. baumannii	unnamed1	Rep_3	r3-T1	-	9862	2022CK-00843	SAMN32734002	North America	USA	Human	Clinical	2022	None	-	No
NZ_CP117729.1	A. baumannii	unnamed1	Rep_3	r3-T1	-	8731	2022CK-00783	SAMN32733979	North America	USA	Urine	Clinical	2022	None	-	No
NZ_CP116389.1	A. baumannii	pWM98-1	Rep_3	r3-T1	-	8731	WM98	SAMN32770956	Pacific	Australia	Wound	Clinical	1998	None	-	No
NZ_CP114382.1	A. baumannii	pAB0155-1	Rep_3	r3-T1	-	8731	AB6870155	SAMN03105183	Pacific	Australia	Sputum	Clinical	2002	None	-	No
NZ_CP107035.1	A. baumannii	pABT-52Ts19	Rep_3	r3-T1	-	13953	GIMC5509:ABT-52Ts19	SAMN31029726	Europe	Russia	Upper respiratory tract	Clinical	2019	Carbapenem	blaOXA-72, blaOXA-72	No
NZ_CP106945.1	A. baumannii	pARC6851_2	Rep_3	r3-T1	-	8831	ARC6851	SAMN31037892	Europe	Greece	Urine	Clinical	2017	None	-	No
NZ_CP104911.1	A. baumannii	punamed1	Rep_3	r3-T1	-	8731	YZM-0406	SAMN30929528	Unknown	nr	Blood	Clinical	2017	None	-	No
NZ_CP104910.1	A. baumannii	punamed2	Rep_3	r3-T1	-	8731	YZM-0314	SAMN30929355	Unknown	nr	Blood	Clinical	2017	None	-	No
NZ_CP104906.1	A. baumannii	punamed1	Rep_3	r3-T1	-	8731	Ab-3557	SAMN30929296	Unknown	nr	Sputum	Clinical	2017	None	-	No
NZ_CP102823.1	A. baumannii	unnamed1	Rep_3	r3-T1	-	9830	AB194-VUB	SAMN25131659	Europe	Belgium	Endotracheal aspirate	Clinical	2017	Carbapenem	blaOXA-72	No
NZ_CP102822.1	A. baumannii	unnamed1	Rep_3	r3-T1	-	9830	AB188-VUB	SAMN25131656	Europe	Belgium	Faeces	Clinical	2017	Carbapenem	blaOXA-72	No
NZ_CP102821.1	A. baumannii	unnamed1	Rep_3	r3-T1	-	9830	AB187-VUB	SAMN25131655	Europe	Belgium	Faeces	Clinical	2017	Carbapenem	blaOXA-72	No
NZ_CP102819.1	A. baumannii	unnamed4	Rep_3	r3-T1	-	9830	AB176-VUB	SAMN25131648	Europe	Belgium	Catheter	Clinical	2017	Carbapenem	blaOXA-72	No
NZ_CP102816.1	A. baumannii	unnamed1	Rep_3	r3-T1	-	9830	AB20-VUB	SAMN25131636	Europe	Belgium	Faeces	Clinical	2014	Carbapenem	blaOXA-72	No
NZ_CP102815.1	A. baumannii	unnamed1	Rep_3	r3-T1	-	9830	AB14-VUB	SAMN25131634	Europe	Belgium	Wound	Clinical	2014	Carbapenem	blaOXA-72	No
NZ_CP102814.1	A. baumannii	unnamed1	Rep_3	r3-T1	-	9830	AB9-VUB	SAMN25131633	Europe	Belgium	Endotracheal aspirate	Clinical	2014	Carbapenem	blaOXA-72	No
NZ_CP087376.1	A. baumannii	p2DB001	Rep_3	r3-T1	-	9830	DB001	SAMN23078443	Europe	Germany	Human	Clinical	nr	Carbapenem	blaOXA-72	No
NZ_CP087359.1	A. baumannii	p2OC041	Rep_3	r3-T1	-	8731	OC041	SAMN23078456	Europe	Germany	Human	Clinical	nr	None	-	No
NZ_CP087356.1	A. baumannii	p2DB002	Rep_3	r3-T1	-	11084	DB002	SAMN23078444	Europe	Germany	Human	Clinical	nr	Carbapenem	blaOXA-72	No
NZ_CP087353.1	A. baumannii	p2DB003	Rep_3	r3-T1	-	11084	DB003	SAMN23078445	Europe	Germany	Human	Clinical	nr	Carbapenem	blaOXA-72	No
NZ_CP087350.1	A. baumannii	p2DB006	Rep_3	r3-T1	-	8732	DB006	SAMN23078448	Europe	Germany	Human	Clinical	nr	None	-	No
NZ_CP087346.1	A. baumannii	p2DB007	Rep_3	r3-T1	-	11084	DB007	SAMN23078449	Europe	Germany	Human	Clinical	nr	Carbapenem	blaOXA-72	No
NZ_CP087319.1	A. baumannii	p1OC064	Rep_3	r3-T1	-	36555	OC064	SAMN23078458	Europe	Germany	Human	Clinical	nr	Multiple including carbapenem	apha7, apha7, blaOXA-58	No
NZ_CP087306.1	A. baumannii	p1OC081	Rep_3	r3-T1	-	8731	OC081	SAMN23078461	Europe	Germany	Human	Clinical	nr	None	-	No
CP115631.1	A. baumannii	unnamed2	Rep_3	r3-T1	-	8731	2022CK-0033	SAMN28788563	North America	USA	Sputum	Clinical	2022	None	-	No
CP115628.1	A. baumannii	unnamed2	Rep_3	r3-T1	-	8731	2022CK-00185	SAMN27182072	North America	USA	nr	Unknown	2022	None	-	No
AP025534.1	A. baumannii	pOCUAc19-3	Rep_3	r3-T1	-	8731	OCU-Ac19	SAMD00258369	Asia	Japan	Pharyngeal secretions	Clinical	2016	None	-	No
CP012955.1	A. baumannii	pD36-3	Rep_3	r3-T1	-	9276	D36	SAMN04029125	Pacific	Australia	wound	Clinical	2008	None	-	Yes
CP014217.1	A. baumannii	p1YU-R612	Rep_3	r3-T1	-	5465	YU-R612	SAMN04448797	Asia	South Korea	sputum	Clinical	2014	None	-	Yes
CP072307.1	A. baumannii	p2KSKSensitive	Rep_3	r3-T1	-	6520	KSK Sensitive	SAMN18452713	Asia	India	respiratory specimen	Clinical	2020	Sulphonamide	sul2	Yes
NZ_CP010355.1	A. johnsonii	pXBB1-4	Rep_3	r3-T1	-	7579	XBB1	SAMN03268929	Asia	China	Hospital sewage	Waste water	2012	Sulphonamide	sul2	No
NZ_CP044452.1	A. indicus	pMMS9-2-2	Rep_3	r3-T1	-	17169	MMS9-2	SAMN12211923	Asia	China	Soil	Environment	2018	None	-	No
NZ_CP044467.1	A. schindleri	pHZE23-1-4	Rep_3	r3-T1	-	12109	HZE23-1	SAMN12478518	Asia	China	Goose faeces	Animal	2018	Other	floR	No
NZ_CP048665.1	A. piscicola	pYH12207-6	Rep_3	r3-T1	-	11857	YH12207_T	SAMN13979601	Asia	China	Pig faeces	Animal	2017	Other	floR	No
NZ_MK978163.1	A. lwoffii	pAVAci94	Rep_3	r3-T1	-	16889	M2a	-	Europe	Romania	Honey	Environment	2014	None	-	No
NZ_OP378603.1	A. baumannii	pACIN00156_2	Rep_3	r3-T1	-	14639	ACIN00156	-	Unknown	nr	nr	Unknown	nr	None	-	No
CP015486.1	A. baumannii	pORAB01-3	Rep_3	r3-T1	-	15198	ORAB01	SAMN03277095	North America	USA	bodily fluid	Clinical	2012	Carbapenem	blaOXA-237	Yes
NZ_JAFEKL010000006.1	A. baumannii	unnamed	Rep_3	r3-T1	-	14639	FDAARGOS_1244	SAMN16357386	North America	USA	nr	Unknown	nr	None	-	No
CP099794.1	A. baumannii	pNCCP16006*	Rep_3	r3-T1	-	8734	NCCP 16006	SAMN29325385	Asia	South Korea	nr	Clinical	2011	None	-	Yes
NC_009084.1	A. baumannii	pAB2	Rep_3	r3-T1	-	11302	ATCC 17978	-	nr	Unknown	unknown	Unknown	2020	None	-	No
NC_012813.1	A. baumannii	pABVA01	Rep_3	r3-T2	-	8963	VA-566/00	SAMN14229501	Europe	Italy	Bronchoalveolar lavage fluid	Clinical	2000	Carbapenem	blaOXA-24	No
NZ_CP107607.1	A. baumannii	unnamed2	Rep_3	r3-T2	-	11625	1326924-1	SAMN30898357	North America	USA	Environment	Environment	2018	None	-	No
NZ_CP107592.1	A. baumannii	unnamed2	Rep_3	r3-T2	-	11625	1326569	SAMN30898321	North America	USA	Skin	Clinical	2018	None	-	No
NZ_CP107589.1	A. baumannii	unnamed2	Rep_3	r3-T2	-	11625	1326527-2	SAMN30898316	North America	USA	Skin	Clinical	2018	None	-	No
GQ904227.1	A. baumannii	pMMCU3	Rep_3	r3-T2	-	8964	-	SAMN14225470	Europe	Spain	nr	Unknown	nr	Carbapenem	blaOXA-24	Yes
AP022240.1	A. baumannii	pWP8-W18-ESBL-11_2	Rep_3	r3-T2	-	10735	WP8-W18-ESBL-11	SAMD00194616	Asia	Japan	waste water	Waste water	2018	None	-	Yes
NZ_CP067020.1	Acinetobacter sp.	unnamed1	Rep_3	r3-T2	-	20852	CS-2	SAMN17142163	Asia	China	Hospital wastewater	Waste water	2020	None	-	No
CP035050.1	A. baumannii	p11.8Kbp	Rep_3	r3-T2	-	11810	ABUH773	SAMN05238697	North America	USA	nr	Clinical	2015	None	-	Yes
NZ_CP094559.1	Acinetobacter sp.	pYH12068-4	Rep_3	r3-T2	-	10660	YH12068_T	SAMN26993015	Asia	China	Pig faeces	Animal	2017	None	-	No
CM009045.2	A. baumannii	p1ZQ4	Rep_3	r3-T2	-	8331	ZQ4	SAMN08093363	Middle East	Iraq	blood	Clinical	2016	None	-	Yes
NZ_CP110464.1	A. baumannii	pRBH2-2	Rep_3	r3-T2	-	12952	RBH2	SAMN31494247	Pacific	Australia	Human	Clinical	1999	Aminoglycoside	aphA6	No
NZ_CP106990.1	A. baumannii	pNY13623-2	Rep_3	r3-T2	-	10967	NY13623	SAMN31100588	Unknown	nr	Sputum	Clinical	nr	None	-	No
NZ_CP102582.1	A. baumannii	p2A9844	Rep_3	r3-T2	-	10967	A9844	SAMN30174926	Unknown	nr	Human	Clinical	nr	None	-	No
CP116804.1	A. baumannii	p37662RM1	Rep_3	r3-T3	-	110969	37662RM1	SAMN11997570	Asia	China	nr	Unknown	2016	None	-	No
NZ_CP102581.1	A. baumannii	p1A9844	Rep_3	r3-T3	-	110967	A9844	SAMN30174926	Unknown	nr	Human	Clinical	nr	None	-	No
NZ_CP104752.1	A. baumannii	pWT37662	Rep_3	r3-T3	-	110967	37662	SAMN11997569	Asia	China	Sputum	Clinical	2012	None	-	No
NZ_CP116802.1	A. baumannii	p37662RM2	Rep_3	r3-T3	-	110964	37662RM2	SAMN11997571	Asia	China	Sputum	Clinical	2016	None	-	No
CM008330.1	A. baumannii	pAC0021R4	Rep_3	r3-T3	-	111165	AC002-1-R4	SAMN04272870	Europe	Switzerland	rectal swab	Clinical	2015	None	-	Yes
AP022239.1	A. baumannii	pWP8-W18-ESBL-11_1	Rep_3	r3-T3	-	114365	WP8-W18-ESBL-11	SAMD00194616	Asia	Japan	waste water	Waste water	2018	None	-	Yes
NZ_CP087333.1	A. baumannii	p2LMG994	Rep_3	r3-T3	-	110738	LMG994	SAMN23078452	Europe	Germany	Human	Clinical	nr	None	-	No
CP028139.1	A. baumannii	pAbNCIMB8209_134	Rep_3	r3-T3	-	133709	NCIMB 8209	SAMN08513260	North America	USA	nr	Environment	1943	None	-	Yes
NZ_CP118934.1	A. pittii	pML4_1	Rep_3	r3-T3	-	99281	ML4	SAMN33440631	Asia	China	Soil	Environment	2022	None	-	No
NZ_CP102935.1	Acinetobacter sp.	unnamed1	Rep_3	r3-T3	-	133577	AOR07_HL	SAMN24045741	Asia	China	Oral swab	Clinical	2020	None	-	No
NZ_CP102763.1	A. baumannii	pAOR07BL-1	Rep_3	r3-T3	-	133579	AOR07-BL	SAMN30248452	Asia	China	Blood	Clinical	2020	None	-	No
NZ_CP077239.1	A. pittii	unnamed1	Rep_3	r3-T3	-	108027	FDAARGOS 1399	SAMN16357541	Europe	Germany	nr	Unknown	nr	None	-	No
NZ_CP028570.1	A. pittii	p2_005046	Rep_3	r3-T3	-	10472	WCHAP005046	SAMN08364583	Asia	China	Human	Clinical	nr	None	-	No
NZ_CP028569.1	A. pittii	p1_005046	Rep_3	r3-T3	-	121612	WCHAP005046	SAMN08364583	Asia	China	Human	Clinical	nr	None	-	No
CP041590.1	A. baumannii	pJ9-3	Rep_3	r3-T3	-	145071	J9	SAMN12158047	Pacific	Australia	clinical	Clinical	1999	Multiple	sul2, floR, ampC, mph(E), msr(E)	Yes
NZ_CP107617.1	A. baumannii	unnamed1	Rep_3	r3-T3	-	110194	1326932	SAMN30898332	North America	USA	Environment	Environment	2018	Sulphonamide	sul2	No
NZ_CP107600.1	A. baumannii	unnamed1	Rep_3	r3-T3	-	110194	1326584	SAMN30898325	North America	USA	Skin	Clinical	2018	Sulphonamide	sul2	No
NZ_CP107594.1	A. baumannii	unnamed1	Rep_3	r3-T3	-	110194	1326580	SAMN30898322	North America	USA	Skin	Clinical	2018	Sulphonamide	sul2	No
NZ_CP087336.1	A. baumannii	p1DB053	Rep_3	r3-T3	-	115180	DB053	SAMN23078451	Europe	Germany	Human	Clinical	nr	None	-	No
CP062920.1	A. baumannii	p4Res13-Abat	Rep_3	r3-T3	-	113139	Res13-Abat-PEA21-P4-01-A	SAMN16304032	North America	Canada	swab	Clinical	2018	None	-	Yes
CP032217.1	A. baumannii	p2UPAB1	Rep_3	r3-T3	-	80061	UPAB1	SAMN09906510	South America	Argentina	urine	Clinical	2016	None	-	Yes
NZ_CP087310.1	A. baumannii	p1OC068	Rep_3	r3-T3	-	111162	OC068	SAMN23078460	Europe	Germany	Human	Clinical	nr	None	-	No
CP046537.1	A. baumannii	pXL380	Rep_3	r3-T3	-	112007	XL380	SAMN13476302	Asia	China	cucumber rhizosphere	Environment	2018	None	-	Yes
NZ_CP110466.1	A. baumannii	pRBH2-4	Rep_3	r3-T3	-	80243	RBH2	SAMN31494247	Pacific	Australia	Human	Clinical	1999	None	-	No
CP034093.1	A. baumannii	pA52-1	Rep_3	r3-T3	-	110713	A52	SAMN10441121	Asia	China	sputum	Clinical	2015	None	-	Yes
CP059475.1	A. baumannii	pM175-3.1	Rep_3	r3-T3	-	113429	M175-3	SAMN15589941	Asia	China	nr	Unknown	2018	Multiple	tet(B), sul2	Yes
CP018333.1	A. baumannii	pA1296_1	Rep_3	r3-T3	-	112773	A1296	SAMN06099024	Asia	China	sputum	Clinical	2010	None	-	Yes
CP026128.1	A. baumannii	pABA-1fe1	Rep_3	r3-T3	-	110754	ABNIH28	SAMN06040401	North America	USA	wastewater	Waste water	2016	None	-	Yes
CP027182.1	A. baumannii	p4AR_0070	Rep_3	r3-T3	-	105127	AR_0070	SAMN04014911	North America	USA	clinical	Clinical	nr	None	-	Yes
CP072527.1	A. baumannii	pDETAB4	Rep_3	r3-T3	-	113682	DETAB-E227	SAMN18498586	Asia	China	Hospital environment	Clinical	2019	Multiple	sul2, tet(B)	Yes
AY541809.1	A. baumannii	pMAC	Rep_3	r3-T4	-	9540	ATCC19606	SAMN14224286	North America	USA	urine	Clinical	1948	None	-	Yes
NC_025122.1	Acinetobacter sp.	pM131-3	Rep_3	r3-T4	-	9541	M131	SAMN14226305	Unknown	nr	nr	Unknown	nr	None	-	No
NZ_CP094256.1	A. indicus	pBDT2076-2	Rep_3	r3-T4	-	16483	BDT2076	SAMN26688158	Asia	China	Chicken faeces	Animal	2020	None	-	No
NZ_CP094259.1	A. indicus	pBDT201-1	Rep_3	r3-T4	-	14897	BDT201	SAMN26688272	Asia	China	Pig	Animal	2020	None	-	No
NZ_CP102832.1	A. baumannii	pAB3927	Rep_3	r3-T4	-	22388	AB3927	SAMN30308647	Asia	China	Bronchoalveolar lavage fluid	Clinical	2022	None	-	No
NZ_CP103414.1	A. baumannii	pAB2369-1	Rep_3	r3-T4	-	11193	AB2369	SAMN30472217	Asia	China	Sputum	Clinical	2022	None	-	No
NZ_CP103415.1	A. baumannii	pAB2369-2	Rep_3	r3-T4	-	11192	AB2369	SAMN30472217	Asia	China	Sputum	Clinical	2022	None	-	No
NZ_CP107033.1	A. baumannii	pABT-52Ts18	Rep_3	r3-T4	-	11194	GIMC5507:ABT-52Ts18	SAMN31029727	Europe	Russia	Upper respiratory tract	Clinical	2019	None	-	No
CP090183.1	A. baumannii	pAB1343	Rep_3	r3-T4	-	11179	AB1343	SAMN24425237	Asia	China	sputum	Clinical	2021	None	-	Yes
CM009653.1	A. baumannii	p5ZQ6	Rep_3	r3-T4	-	16476	ZQ6	SAMN08093365	Middle East	Iraq	wound swab	Clinical	2016	None	-	Yes
CP095092.1	A. baumannii	pAB4451	Rep_3	r3-T4	-	11178	AB4451	SAMN27303889	Asia	China	sputum	Clinical	2022	None	-	Yes
GU978997.1	A. baumannii	p203	Rep_3	r3-T5	-	1068	Ab203	-	Europe	Italy	clinical	Clinical	2010	None	-	No
NZ_CP026088.1	A. pittii	p2_005069	Rep_3	r3-T5	-	9203	WCHAP005069	SAMN08382337	Asia	China	Human	Clinical	nr	None	-	No
NZ_CP043055.1	A. pittii	pAP43-3	Rep_3	r3-T5	-	9203	AP43	SAMN12612836	Asia	China	Urine	Clinical	2018	None	-	No
CP038260.1	A. baumannii	pEH_gr3	Rep_3	multi-rep	-	25856	39741	SAMN10386508	Europe	Czech Republic	Tracheal aspirate	Clinical	2018	None	-	Yes
NZ_CP027248.1	A. pittii	p2_100004	Rep_3	multi-rep	-	18485	WCHAP100004	SAMN08031286	Asia	China	Human	Clinical	2015	None	-	No
NZ_JACYVX010000080.1	A. nosocomialis	pCAC13b	Rep_3	multi-rep	-	17330	CAC13	SAMN16244549	Africa	South Africa	Blood	Clinical	2017	None	-	No
CP021348.1	A. baumannii	pB8300	Rep_3	multi-rep	-	25150	B8300	SAMN03771402	Asia	India	blood	Clinical	2015	None	-	Yes
NZ_CP103341.1	A. baumannii	unnamed4	Rep_3	multi-rep	-	13439	AB105	SAMN30068511	Asia	China	Human	Clinical	2022	None	-	No
NZ_CP087334.1	A. baumannii	p3LMG994	Rep_3	r3-T5	-	7296	LMG994	SAMN23078452	Europe	Germany	Human	Clinical	nr	None	-	No
NZ_CP075324.1	Acinetobacter sp.	p1	Rep_3	r3-T5	-	7145	BHS4	SAMN19184900	Asia	China	AC condensate	Environment	2020	None	-	No
NZ_CP087342.1	A. baumannii	p1DB008	Rep_3	r3-T5	-	9203	DB008	SAMN23078450	Europe	Germany	Human	Clinical	nr	None	-	No
CP065434.1	A. baumannii	pAB17961-2	Rep_3	r3-T5	-	6667	ATCC 17961	SAMN08687991	North America	USA	blood	Clinical	2016	None	-	Yes
CP099970.1	A. baumannii	pF-1629*	Rep_3	r3-T5	-	19011	F-1629	SAMN29213188	Asia	South Korea	nr	Clinical	nr	None	-	Yes
NZ_CP087330.1	A. baumannii	p2OC074	Rep_3	r3-T5	-	6806	OC074	SAMN23078453	Europe	Germany	Human	Clinical	nr	None	-	No
NZ_CP014479.1	A. pittii	pOXA58-AP_882	Rep_3	r3-T6	-	36862	AP_882	SAMN04495667	Asia	Malaysia	Wound swab	Clinical	2014	Multiple including carbapenem	msr(E), mph(E), blaOXA-58	No
NZ_CP020587.1	A. nosocomialis	pSSA3_1	Rep_3	r3-T6	-	11400	SSA3	SAMN06650244	Asia	South Korea	Blood	Clinical	2013	Tetracycline	tet39	No
NZ_CP031981.1	A. haemolyticus	pAhaemAN4c	Rep_3	r3-T6	-	10554	AN4	SAMN09927973	North America	Mexico	Ulcer by decubitus	Clinical	2010	None	-	No
NZ_CP031994.1	A. haemolyticus	pAhaem2126chd	Rep_3	r3-T6	-	10554	2126ch	SAMN09927970	North America	Mexico	Ascites liquid	Clinical	2011	None	-	No
NZ_CP061628.1	A. seifertii	pAS48-2	Rep_3	r3-T6	-	12619	AS48	SAMN16092228	Asia	Taiwan	Blood	Clinical	2010-2017	None	-	No
NZ_JAPHLB020000017.1	A. baumannii	pT190_3	Rep_3	r3-T6	-	25108	T190	SAMN25160020	North America	USA	Draining-Matting Conveyor	Environment	2019	None	-	No
CM009030.2	A. baumannii	p1ZQ10	Rep_3	multi-rep	-	35194	ZQ10	SAMN08093369	Middle East	Iraq	cerebrospinal fluid	Clinical	2016	Multiple	tet39, msr(E), mph(E)	Yes
CP059553.1	A. seifertii	p3E-022166	Rep_3	r3-T6	-	15301	E-022166	SAMN15646566	Europe	Finland	Brewery	Environment		None	-	No
NZ_CP048663.1	A. piscicola	pYH12207-4	Rep_3	r3-T6	-	13003	YH12207_T	SAMN13979601	Asia	China	Pig faeces	Animal	2017	None	-	No
CP042207.1	A. baumannii	pTS9900	Rep_3	r3-T6	-	9900	DS002	SAMN08637743	Asia	India	soil	Environment	2005	None	-	Yes
NZ_CP118935.1	A. pittii	pML4_2	Rep_3	r3-T6	-	9131	ML4	SAMN33440631	Asia	China	Soil	Environment	2022	None	-	No
NZ_CP087327.1	A. baumannii	p2OC073	Rep_3	r3-T6	-	10080	OC073	SAMN23078455	Europe	Germany	Human	Clinical	nr	None	-	No
NZ_CP069538.1	A. pittii	unnamed1	Rep_3	r3-T6	-	9132	FDAARGOS_1214	SAMN16357356	Europe	Germany	nr	Unknown	nr	None	-	No
NZ_CP069507.1	A. pittii	unnamed3	Rep_3	r3-T6	-	9084	FDAARGOS_1215	SAMN16357357	Europe	Germany	nr	Unknown	nr	None	-	No
NZ_CP069497.1	A. pittii	unnamed1	Rep_3	r3-T6	-	9060	FDAARGOS_1217	SAMN16357359	Europe	Germany	nr	Unknown	nr	None	-	No
NZ_CP042367.1	A. pittii	pC54_003	Rep_3	multi-rep	-	25906	C54	SAMN12289369	Pacific	Australia	Human	Clinical	2014	None	-	No
NZ_CP027252.3	A. pittii	p2_100020	Rep_3	r3-T6	-	9132	WCHAP100020	SAMN08031302	Asia	China	Human	Clinical	2015	None	-	No
AYFH01000048.1	A. baumannii	pABUH3a-8.2	Rep_3	r3-T6	-	8190	UH7607	SAMN02597386	North America	USA	urine	Clinical	2007	Carbapenem	blaOXA-24	Yes
NC_025173.1	A. pittii	pMS32-1	Rep_3	r3-T7	-	94418	MS32	SAMN14226816	Asia	Taiwan	nr	Unknown	2010	None	-	No
NZ_CM001803.1	A. pittii	pXM2	Rep_3	r3-T7	-	93891	XM1570	SAMN02469349	Asia	China	Sputum	Clinical	2010	None	-	No
NZ_CP010369.1	A. nosocomialis	p6411-89.111kb	Rep_3	r3-T7	-	89111	6411	SAMN03263968	South America	Colombia	Excreted bodily substance	Clinical	2012	None	-	No
NZ_CP026087.2	A. pittii	p1_005069	Rep_3	r3-T7	-	91563	WCHAP005069	SAMN08382337	Asia	China	Human	Clinical	nr	None	-	No
NZ_CP027247.2	A. pittii	p1_100004	Rep_3	r3-T7	-	66765	WCHAP100004	SAMN08031286	Asia	China	Human	Clinical	2015	None	-	No
NZ_CP027251.3	A. pittii	p1_100020	Rep_3	r3-T7	-	77340	WCHAP100020	SAMN08031302	Asia	China	Human	Clinical	2015	None	-	No
NZ_CP043054.1	A. pittii	pAP43-2	Rep_3	r3-T7	-	92276	AP43	SAMN12612836	Asia	China	Urine	Clinical	2018	None	-	No
NZ_CP069506.1	A. pittii	unnamed2	Rep_3	r3-T7	-	94379	FDAARGOS_1215	SAMN16357357	Europe	Germany	nr	Unknown	nr	None	-	No
NZ_CP069540.1	A. pittii	unnamed3	Rep_3	r3-T7	-	94387	FDAARGOS_1214	SAMN16357356	Europe	Germany	nr	Unknown	nr	None	-	No
NZ_CP077304.1	A. pittii	unnamed1	Rep_3	r3-T7	-	94386	FDAARGOS 1396	SAMN16357538	Europe	Germany	nr	Unknown	nr	None	-	No
NC_010404.1	A. baumannii	p3ABAYE	Rep_3	r3-T7	-	94413	AYE	SAMEA3138279	Europe	Unknown	Unknown	Unknown	nr	None	-	No
NC_025172.1	Acinetobacter sp.	pM131-2	Rep_3	r3-T7	-	84995	M131	SAMN14226304	Unknown	nr	nr	Unknown	nr	Multiple including carbapenem	sul2, apha7, aaCc2d, blaOXA-58, sul2	No
NZ_CP028560.1	Acinetobacter sp.	pNDM1_010045	Rep_3	r3-T7	-	190170	WCHA45	SAMN07138955	Asia	China	Sewage	Waste water	2015	Multiple including carbapenem	aaCc2d, blaOXA-58, ble-MBL, blaNDM-1, sul2, floR, msr(E), mph(E), blaOXA-58	No
CP027245.2	A. baumannii	pOXA58_005078	Rep_3	r3-T7	-	70509	WCHAB005078	SAMN08364584	Asia	China	nr	Unknown	nr	Multiple including carbapenem	aacC2d, blaOXA-58, msr(E), mph(E), floR	Yes
NZ_ALIG01000010.1	A. venetianus	pAV3	Rep_3	multi-rep	-	186446	VE-C3	SAMN02471758	Europe	Italy	Lagoon	Environment	1997	None	-	No
NZ_CP077233.1	A. pittii	unnamed1	Rep_3	r3-T7	-	69574	FDAARGOS 1397	SAMN16357539	Europe	Germany	nr	Unknown	nr	None	-	No
NZ_AP024799.1	A. pittii	pOCUAc17-1	Rep_3	r3-T7	-	69156	OCU Ac17	SAMD00330122	Asia	Japan	Blood	Clinical	nr	None	-	No
CP038263.1	A. baumannii	pEC_gr13	Rep_3	r3-T7	-	128013	LEV1449/17Ec	SAMN10386510	Europe	Czech Republic	frozen liver	Clinical	2018	None	-	Yes
NZ_JAPHLB020000016.1	A. baumannii	pT190_2	Rep_3	r3-T7	-	138379	T190	SAMN25160020	North America	USA	Draining-Matting Conveyor	Environment	2019	None	-	No
NZ_CM012183.1	A. bereziniae	pAbe229-114	Rep_3	r3-T7	-	114007	HPC229	SAMN04115377	South America	Argentina	Blood	Clinical	2014	None	-	No
NZ_CP010358.1	A. johnsonii	pXBB1-8	Rep_3	r3-T7	-	117483	XBB1	SAMN03268929	Asia	China	Hospital sewage	Waste water	2012	None	-	No
NZ_CP022299.1	A. johnsonii	pIC001A	Rep_3	r3-T7	-	94476	IC001	SAMN07298690	Asia	Japan	River	Environment	2003	None	-	No
NZ_CP089053.1	A. ursingii	pRIVM_C010559_2	Rep_3	r3-T7	-	211456	RIVM_C010559	SAMN23563197	Europe	Netherlands	Human	Clinical	2015	None	-	No
NZ_CP038025.1	A. radioresistens	pAR3	Rep_3	r3-T7	-	80103	DD78	SAMN11179230	South America	Chile	Soil	Environment	2008	None	-	No
NZ_CP079794.1	A. johnsonii	pAJ_082-3	Rep_3	r3-T7	-	155957	AJ_082	SAMN10249157	Asia	Pakistan	Washroom sink in hospital intensive care unit	Clinical	2016	None	-	No
NZ_CP070867.1	A. johnsonii	plas1	Rep_3	r3-T7	-	149408	XY27	SAMN17981369	Asia	China	Bigeye tuna	Animal	2018	None	-	No
NZ_CP055284.1	Acinetobacter sp.	pBspH2	Rep_3	r3-T7	-	161809	NEB 394	SAMN15195663	North America	USA	Soil	Environment	1986	None	-	No
NZ_CP068175.1	A. ursingii	unnamed1	Rep_3	r3-T7	-	120510	FDAARGOS_1096	SAMN16357265	Europe	Germany	nr	Unknown	nr	None	-	No
NZ_CP069498.1	A. pittii	unnamed2	Rep_3	r3-T7	-	128321	FDAARGOS_1217	SAMN16357359	Europe	Germany	nr	Unknown	nr	None	-	No
CP033769.1	A. baumannii	p2FDAARGOS_533	Rep_3	r3-T7	-	97783	FDAARGOS_533	SAMN10163228	North America	USA	sputum	Clinical	2016	None	-	Yes
NZ_CP087363.1	A. baumannii	p1OC008	Rep_3	r3-T7	-	80570	OC008	SAMN23078454	Europe	Germany	Human	Clinical	nr	None	-	No
NZ_CP087329.1	A. baumannii	p1OC074	Rep_3	r3-T7	-	88290	OC074	SAMN23078453	Europe	Germany	Human	Clinical	nr	None	-	No
NZ_CP087326.1	A. baumannii	p1OC073	Rep_3	r3-T7	-	113509	OC073	SAMN23078455	Europe	Germany	Human	Clinical	nr	None	-	No
CP041149.1	A. baumannii	pCUVET596	Rep_3	r3-T7	-	82016	CUVET-MIC596	SAMN12057668	Asia	Thailand	urine	Clinical	2017	None	-	Yes
CP044357.1	A. baumannii	pCAM180A	Rep_3	r3-T7	-	92034	CAM180-1	SAMN12825295	Asia	Cambodia	oral cavity	Clinical	2016	None	-	Yes
EU294228.1	A. baumannii	pABIR	Rep_3	r3-T8	-	29823	ABIR	SAMN14225727	Europe	Italy	nr	Unknown	2007	Multiple including carbapenem	blaOXA-58, msr(E), mph(E)	Yes
AY228470.1	A. baumannii	pAB02	Rep_3	r3-T8	-	4162	AB02	-	Europe	France	nr	Clinical	2002	Carbapenem	blaOXA-40	Yes
NZ_MZ312462.1	A. nosocomialis	pHUAV	Rep_3	r3-T8	-	10269	HUAV-AN66	-	Europe	Spain	Urine/sputum	Clinical	2020	Carbapenem	blaOXA-24	No
NZ_MN481286.1	A. baylyi	pA2702	Rep_3	r3-T8	-	10750	A2702	-	Asia	China	Sputum	Clinical	nr	Carbapenem	blaOXA-72	No
NZ_CP104353.1	A. baumannii	unnamed2	Rep_3	r3-T8	-	9935	2021CK-01335	SAMN21493862	North America	USA	Wound/Abscess	Clinical	2021	Carbapenem	blaOXA-72	No
NZ_CP104344.1	A. baumannii	unnamed2	Rep_3	r3-T8	-	9935	2021CK-01300	SAMN21493827	North America	USA	Wound/Abscess	Clinical	2021	Carbapenem	blaOXA-72	No
NZ_CP033132.1	A. wuhouensis	pOXA653_010062	Rep_3	r3-T8	-	8773	WCHAW010062	SAMN07138954	Asia	China	Sewage	Waste water	2015	Carbapenem	blaOXA-653	No
NZ_CP016899.1	A. soli	pGFJ3	Rep_3	r3-T8	-	10453	GFJ2	SAMN05554081	Asia	Thailand	Soil	Environment	2011	None	-	No
NZ_CM012184.1	A. bereziniae	pAbe229-15	Rep_3	r3-T8	-	15389	HPC229	SAMN04115377	South America	Argentina	Blood	Clinical	2014	None	-	No
NC_013056.1	A. calcoaceticus	pMMCU1	Rep_3	r3-T8	-	8771	Acal H12O-07	SAMN14225339	Europe	Spain	Blood	Clinical	nr	Carbapenem	blaOXA-24	No
KT022421.1	A. baumannii	pAB-ML	Rep_3	r3-T8	-	12056	ML	SAMN14226656	Asia	Taiwan	nr	Unknown	nr	Carbapenem	blaOXA-72	Yes
NZ_MN461228.1	A. pittii	pA2584	Rep_3	r3-T8	-	8166	A2584	-	Asia	China	Sputum	Clinical	nr	Carbapenem	blaOXA-72	No
NZ_KY499579.1	A. pittii	pAP10253-1	Rep_3	r3-T8	-	10498	CCBH10253	SAMN14227516	South America	Brazil	Human	Clinical	2012	Carbapenem	blaOXA-72	No
NZ_CP015146.1	A. pittii	pIEC338SCOX	Rep_3	r3-T8	-	10498	IEC338SC	SAMN04576523	South America	Brazil	Tracheal secretion	Clinical	2014	Carbapenem	blaOXA-72	No
NZ_CP018141.1	A. larvae	pRW1	Rep_3	r3-T8	-	12170	BRTC-1	SAMN05520995	Asia	China	Insect	Animal	2015	None	-	No
NZ_CP032127.1	A. chinensis	p1_010005	Rep_3	r3-T8	-	18155	WCHAc010005	SAMN07138949	Asia	China	Sewage	Waste water	2015	Multiple	msr(E), mph(E), tet39	No
NZ_CP045104.1	A. johnsonii	pAJ4131	Rep_3	multi-rep	-	13891	AJ413	SAMN12989377	Asia	China	Urban river water	Environment	2018	None	-	No
NZ_CP090181.1	A. johnsonii	pDJ-Red	Rep_3	r3-T8	-	8887	DJ-Red	SAMN24405178	Asia	China	Human	Clinical	2021	None	-	No
NZ_MH401131.1	A. baumannii	pA230-2	Rep_3	r3-T9	-	106975	A230	-	Europe	United Kingdom	Human	Clinical	1998	None	-	No
CP115638.1	A. baumannii	unnamed1	Rep_3	r3-T9	-	107426	2022CK-00211	SAMN27182098	North America	USA	Sputum	Clinical	2022	None	-	No
CP115640.1	A. baumannii	unnamed1	Rep_3	r3-T9	-	107426	2022CK-00241	SAMN27591179	North America	USA	Sputum	Clinical	2022	None	-	No
CP115642.1	A. baumannii	unnamed1	Rep_3	r3-T9	-	107426	2022CK-00251	SAMN27739163	North America	USA	Sputum	Clinical	2022	None	-	No
CP115644.1	A. baumannii	unnamed1	Rep_3	r3-T9	-	107426	2022CK-00317	SAMN28788543	North America	USA	Sputum	Clinical	2022	None	-	No
CP115646.1	A. baumannii	unnamed1	Rep_3	r3-T9	-	104651	2022CK-00371	SAMN29151496	North America	USA	Skin	Clinical	2022	None	-	No
NZ_CP031384.1	A. baumannii	pLUH6011-1	Rep_3	r3-T9	-	6462	LUH 6011	SAMN09244924	Europe	Greece	nr	Unknown	1997	None	-	No
CP026705.1	A. baumannii	tig00000058_pilon	Rep_3	r3-T9	-	113706	AR_0056	SAMN04014897	North America	USA	clinical	Clinical	nr	Macrolide	mph(E), msr(E)	Yes
NZ_CP044462.1	A. indicus	pB18-7	Rep_3	r3-T10	-	13146	B18	SAMN12429970	Asia	China	Pigeon	Animal	2016	None	-	No
LR026972.1	A. baumannii	pKCRI-28-1	Rep_3	multi-rep	-	29606	RDK36_28	SAMEA4646212	Africa	Tanzania	wound swab	Clinical	2013	Multiple	tet39, cmlB1, mph(E), msr(E)	Yes
NZ_CP078030.1	A. variabilis	pAV_175-4	Rep_3	r3-T10	-	19843	AV_175	SAMN10248995	Asia	Pakistan	Alcohol foam dispenser in hospital intensive care unit	Clinical	2016	Multiple	tet39, msr(E), mph(E)	No
NC_010396.1	A. baumannii	p2ABSDF	Rep_3	multi-rep	-	25014	SDF	SAMEA3138277	Europe	Unknown	Unknown	Unknown	nr	None	-	No
CM003742.1	A. baumannii	p1MEX11594	Rep_3	r3-T10	-	4437	MEX11594	SAMN04407353	North America	Mexico	Pleural fluid	Clinical	2011	None	-	Yes
CP051871.1	A. baumannii	pAb-D10a-a_2	Rep_3	r3-T10	-	8495	Ab-D10a-a	SAMN14667516	Africa	Ghana	cerebrospinal fluid	Clinical	2016	None	-	Yes
NZ_CP102825.1	A. baumannii	unnamed	Rep_3	r3-T10	-	12543	AB3-VUB	SAMN25131632	Europe	Belgium	Endotracheal aspirate	Clinical	2017	Carbapenem	blaOXA-58	No
NZ_CP015619.1	A. schindleri	p4AsACE	Rep_3	r3-T11	-	10218	ACE	SAMN04956557	North America	Mexico	Laboratory	Clinical	2013	None	-	No
NZ_CP044461.1	A. indicus	pB18-6	Rep_3	r3-T11	-	14098	B18	SAMN12429970	Asia	China	Pigeon	Animal	2016	None	-	No
NZ_CP083662.1	A. variabilis	unnamed4	Rep_3	r3-T11	-	11089	FDAARGOS_1487	SAMN21218843	Europe	Germany	nr	Unknown	nr	None	-	No
GU978998.1	A. baumannii	p844	Rep_3	r3-T11	-	1119	Ab844	-	Europe	Unknown	clinical	Clinical	2010	None	-	No
NZ_CP090071.1	Acinetobacter sp.	pYUSHP14-4	Rep_3	r3-T11	-	8008	SH20PTE14	SAMN24291981	Asia	China	Pig faeces	Animal	2020	None	-	No
NZ_CP033860.1	Acinetobacter sp.	unnamed3	Rep_3	r3-T12	-	11600	FDAARGOS_493	SAMN10163169	Unknown	nr	Human	Clinical	nr	None	-	No
NZ_CP028558.1	Acinetobacter sp.	p3_010045	Rep_3	r3-T12	-	6132	WCHA45	SAMN07138955	Asia	China	Sewage	Waste water	2015	None	-	No
NZ_CP031710.1	A. wuhouensis	p2_010060	Rep_3	multi-rep	-	30787	WCHA60	SAMN05356836	Asia	China	Hospital sewage	Waste water	2015	Macrolide	msr(E), mph(E)	No
NZ_CP031989.1	A. haemolyticus	pAhaem5227b	Rep_3	r3-T12	-	12769	5227	SAMN09927971	North America	Mexico	Blood	Clinical	2014	None	-	No
NZ_CP032004.1	A. haemolyticus	pAhaem11616e	Rep_3	r3-T12	-	10694	11616	SAMN09927968	North America	Mexico	Blood	Clinical	2012	None	-	No
AFDA02000011.1	A. baumannii	pNaval18-7.0	Rep_3	r3-T12	-	7032	Naval-18	SAMN00114927	North America	USA	nr	Clinical	2006	None	-	Yes
NZ_CP068196.1	A. johnsonii	unnamed1	Rep_3	r3-T12	-	8087	FDAARGOS_1093	SAMN16357262	Europe	Germany	nr	Unknown	nr	None	-	No
NZ_CP039153.1	Acinetobacter sp.	p10FS3-1-10	Rep_3	r3-T12	-	9137	10FS3-1	SAMN11349729	Asia	China	Pig faeces	Animal	2015	None	-	No
CP045108.1	A. baumannii	p1ATCC19606	Rep_3	r3-T12	-	7655	ATCC 19606	SAMN12389466	North America	USA	urine	Clinical	1948	None	-	Yes
NZ_AP021938.1	A. pittii	pWP2-W18-ESBL-11_2	Rep_3	r3-T13	-	10416	WP2-W18-ESBL-12	SAMD00194360	Asia	Japan	Effluent wastewater	Waste water	2018	None	-	No
NZ_JAPHLB020000018.1	A. baumannii	pT190_4	Rep_3	r3-T13	-	10837	T190	SAMN25160020	North America	USA	Draining-Matting Conveyor	Environment	2019	None	-	No
NZ_CP077240.1	A. pittii	unnamed2	Rep_3	r3-T13	-	9581	FDAARGOS 1399	SAMN16357541	Europe	Germany	nr	Unknown	nr	None	-	No
NZ_CP069505.1	A. pittii	unnamed1	Rep_3	r3-T13	-	11158	FDAARGOS_1215	SAMN16357357	Europe	Germany	nr	Unknown	nr	None	-	No
NZ_CP063771.1	Acinetobacter sp.	unnamed2	Rep_3	r3-T13	-	17334	Ac-14	SAMN16550521	Asia	China	Fruit tree rhizosphere soil	Environment	2016	None	-	No
NZ_AP024801.1	A. pittii	pOCUAc17-3	Rep_3	r3-T13	-	11158	OCU Ac17	SAMD00330122	Asia	Japan	Blood	Clinical	nr	None	-	No
NZ_AP022304.1	Acinetobacter sp.	pBEC1-S18-ESBL-01_2	Rep_3	r3-T13	-	11158	BEC1-S18-ESBL-01	SAMD00194714	Asia	Japan	Seawater	Environment	2018	None	-	No
NZ_CP027662.1	A. pittii	pApW20-4	Rep_3	r3-T13	-	7680	Ap-W20	SAMN08683320	Asia	China	Fish	Animal	2013	None	-	No
CP026126.1	A. baumannii	pABA-6973	Rep_3	r3-T13	-	11305	ABNIH28	SAMN06040401	North America	USA	wastewater	Waste water	2016	None	-	Yes
NZ_CP095409.1	A. pittii	pTCM-2	Rep_3	r3-T13	-	11346	TCM	SAMN27485236	Asia	China	Blood	Clinical	2018	None	-	No
NZ_CP077374.1	A. lwoffii	unnamed5	Rep_3	r3-T13	-	8723	FDAARGOS 1394	SAMN16357536	Europe	Germany	nr	Unknown	nr	None	-	No
CP010400.1	A. baumannii	p6200-9.327kb	Rep_3	r3-T13	-	9327	6200	SAMN03263969	South America	Colombia	bodily fluid	Clinical	2012	None	-	Yes
CP059388.1	A. baumannii	p2.36-1512	Rep_3	r3-T13	-	9458	36-1512	SAMN15541804	Europe	Russia	respiratory tract	Clinical	2014	None	-	Yes
AFDA02000008.1	A. baumannii	pNaval18-8.4	Rep_3	r3-T13	-	8422	Naval-18	SAMN00114927	North America	USA	nr	Clinical	2006	Tetracycline	tet39	Yes
NZ_AP019745.1	A. radioresistens	pARA5	Rep_3	r3-T14	-	9388	NBRC 102413	SAMD00041796	Unknown	nr	nr	Unknown	nr	None	-	No
NZ_CP030756.1	A. schindleri	unnamed2	Rep_3	r3-T14	-	25870	H3	SAMN09464373	Asia	China	Condensate water on spacecraft	Environment	2012	None	-	No
NZ_CP039149.1	Acinetobacter sp.	p10FS3-1-6	Rep_3	r3-T14	-	13219	10FS3-1	SAMN11349729	Asia	China	Pig faeces	Animal	2015	None	-	No
NZ_CP084304.1	A. pseudolwoffii	pXMC5X702-12k	Rep_3	r3-T14	-	12477	XMC5X702	SAMN20477963	Asia	China	Chicken faeces	Animal	2020	None	-	No
CP033871.1	A. baumannii	p597A-14.8	Rep_3	multi-rep	-	14087	MRSN15313	SAMN10411605	South America	Brazil	cerebrospinal fluid	Clinical	2008	None	-	Yes
NZ_JAQSVA010000036.1	A. baumannii	pV15_2	Rep_3	r3-T14	-	8762	V15	SAMN33101523	Europe	Lithuania	Human	Clinical	2010	None	-	No
CP098793.1	A. baumannii	p2VB280820	Rep_3	r3-T14	-	9878	280820	SAMN28980502	Asia	China	sputum	Clinical	2021	Tetracycline	tet39	Yes
NZ_AP019746.1	A. radioresistens	pARA6	Rep_3	r3-T15	-	5898	NBRC 102413	SAMD00041796	Unknown	nr	nr	Unknown	nr	None	-	No
CP084299.1	A. baumannii	pLHC22-2-6.9k	Rep_3	r3-T15	-	6942	LHC22-2	SAMN20477964	Asia	China	Chicken faeces	Animal	2020	Tetracycline	tet39	Yes
NZ_CP094558.1	Acinetobacter sp.	pYH12068-3	Rep_3	multi-rep	-	14153	YH12068_T	SAMN26993015	Asia	China	Pig faeces	Animal	2017	Macrolide	msr(E), mph(E), msr(E), mph(E)	No
NZ_CP032277.1	Acinetobacter sp.	p9_010034	Rep_3	r3-T15	-	5934	WCHAc010034	SAMN05356835	Asia	China	Hospital sewage	Waste water	2015	Beta lactam	blaMCA	No
NZ_CP029392.2	A. defluvii	p4_010030	Rep_3	r3-T15	-	4761	WCHA30	SAMN05356262	Asia	China	Sewage	Waste water	2015	None	-	No
NZ_CP031714.1	A. wuhouensis	p6_010060	Rep_3	r3-T15	-	5113	WCHA60	SAMN05356836	Asia	China	Hospital sewage	Waste water	2015	None	-	No
NZ_CP032123.1	A. lwoffii	pALWED2.8	Rep_3	r3-T15	-	8120	ED45-23	SAMN05251103	Asia	Russia	Permafrost	Environment	nr	None	-	No
NZ_MK944322.1	A. lwoffii	pAVAci176	Rep_3	r3-T15	-	6711	M2a	-	Europe	Romania	Honey	Environment	2014	None	-	No
CP061712.1	A. baumannii	p2E072658	Rep_3	r3-T15	-	6018	E-072658	SAMN15646565	Europe	Finland	paper pulp mill	Environment	2009	None	-	Yes
CM016516.1	A. baumannii	pTG31307	Rep_3	r3-T16	-	55269	TG31307	SAMN10261616	North America	USA	blood	Clinical	2012	None	-	Yes
NZ_CP048657.1	A. indicus	pC15-3	Rep_3	r3-T17	-	31061	C15_T	SAMN13979600	Asia	China	Pig faeces	Animal	2015	None	-	No
NZ_CP044447.1	A. indicus	pCMG3-2-2	Rep_3	r3-T17	-	16151	CMG3-2	SAMN12211912	Asia	China	Goose faeces	Animal	2017	Macrolide	msr(E), mph€	No
CP015365.1	A. baumannii	pAba3207a	Rep_3	r3-T17	-	13478	3207	SAMN04485290	North America	Mexico	Bronchial fluid	Clinical	2008	Carbapenem	blaOXA-58	Yes
NC_010401.1	A. baumannii	p1ABAYE	Rep_3	r3-T18	-	5644	AYE	SAMEA3138279	Europe	France	Blood	Clinical	2001	None	-	No
NZ_CP032139.1	Acinetobacter sp.	p2_010052	Rep_3	r3-T18	-	7654	WCHAc010052	SAMN07138952	Asia	China	Sewage	Waste water	2015	None	-	No
NZ_CP042368.1	A. pittii	pC54_004	Rep_3	r3-T18	-	6575	C54	SAMN12289369	Pacific	Australia	Human	Clinical	2014	None	-	No
NZ_CP044490.1	A. schindleri	pHZE30-1-7	Rep_3	r3-T18	-	6838	HZE30-1	SAMN12478519	Asia	China	Goose faeces	Animal	2018	None	-	No
CP059552.1	A. seifertii	p4E-022166	Rep_3	multi-rep	-	25471	E-022166	SAMN15646566	Europe	Finland	Brewery	Environment	nr	None	-	No
NZ_CP031712.1	A. wuhouensis	p4_010060	Rep_3	multi-rep	-	12273	WCHA60	SAMN05356836	Asia	China	Hospital sewage	Waste water	2015	None	-	No
NZ_CP029390.2	A. defluvii	p2_010030	Rep_3	r3-T18	-	7173	WCHA30	SAMN05356262	Asia	China	Sewage	Waste water	2015	None	-	No
NZ_CP095410.1	A. pittii	pTCM-3	Rep_3	r3-T18	-	8505	TCM	SAMN27485236	Asia	China	Blood	Clinical	2018	Macrolide	msr(E), mph(E)	No
NZ_CP094544.1	Acinetobacter sp.	pYH16040-3	Rep_3	r3-T18	-	7236	YH16040_T	SAMN26992838	Asia	China	Pig faeces	Animal	2016	Macrolide	msr(E), mph(E)	No
NZ_CP033127.1	A. wuhouensis	p7_010062	Rep_3	r3-T18	-	7351	WCHAW010062	SAMN07138954	Asia	China	Sewage	Waste water	2015	None	-	No
NZ_CP032272.1	Acinetobacter sp.	p4_010034	Rep_3	multi-rep	-	12457	WCHAc010034	SAMN05356835	Asia	China	Hospital sewage	Waste water	2015	Tetracycline	tet39	No
NZ_CP032121.2	A. lwoffii	pALWED2.6	Rep_3	r3-T18	-	9201	ED45-23	SAMN05251103	Asia	Russia	Permafrost	Environment	nr	None	-	No
NZ_CP032103.2	A. lwoffii	pALWEK1.10	Rep_3	r3-T18	-	9238	EK30A	SAMN05251105	Asia	Russia	Permafrost	Environment	nr	None	-	No
CP042561.1	A. baumannii	pE47_005	Rep_3	r3-T18	-	5234	E47	SAMN12289292	Pacific	Australia	Hospital surfaces	Clinical	2013	None	-	Yes
CP027179.1	A. baumannii	p2AR_0070	Rep_3	r3-T19	-	39535	AR_0070	SAMN04014911	North America	USA	clinical	Clinical	nr	Carbapenem	blaOXA-58, blaOXA-58, blaOXA-58	Yes
NZ_CP041290.1	A. indicus	p94-2-tetX3	Rep_3	r3-T20	-	42489	94-2	SAMN12158188	Asia	China	Cow	Animal	2018	Tetracycline	tet(X)	No
NZ_ALIR01000021.1	A. radioresistens	pWCA157-53	Rep_3	r3-T20	-	53388	WC-A-157	SAMN02436573	Middle East	Iraq	nr	Unknown	2008	None	-	No
NZ_CP010903.1	A. nosocomialis	p6411-66.409kb	Rep_3	r3-T20	-	66409	6411	SAMN03263968	South America	Colombia	Excreted bodily substance	Clinical	2012	None	-	No
NZ_CP038024.1	A. radioresistens	pAR2	Rep_3	r3-T20	-	69207	DD78	SAMN11179230	South America	Chile	Soil	Environment	2008	None	-	No
NZ_CP077371.1	A. lwoffii	unnamed2	Rep_3	r3-T20	-	47918	FDAARGOS 1394	SAMN16357536	Europe	Germany	nr	Unknown	nr	None	-	No
NZ_CP044485.1	A. schindleri	pHZE30-1-2	Rep_3	r3-T20	-	68525	HZE30-1	SAMN12478519	Asia	China	Goose faeces	Animal	2018	Multiple	aadA1, sat2, dfrA1, floR, tet(M)	No
CP053220.1	A. baumannii	p2DT01139C	Rep_3	r3-T20	-	63650	DT01139C	SAMN14833556	Africa	Tanzania	clinical	Clinical	2017	Multiple	floR, sul2, aacC2d, blaCARB-16, aphA6, blaNDM-1, ble-MBL	Yes
NZ_MK978162.1	A. lwoffii	pAVAci14	Rep_3	r3-T20	-	45741	M2a	-	Europe	Romania	Honey	Environment	2014	None	-	No
CP059476.1	A. baumannii	pM175-3.2	Rep_3	r3-T20	-	57742	M175-3	SAMN15589941	Asia	China	nr	Unknown	2018	Multiple	aphA7, dfrA16, blaCARB2, aadA2, aacC2d, floR, tet(M)	Yes
CP051870.1	A. baumannii	pAb-D10a-a_1	Rep_3	r3-T20	-	48239	Ab-D10a-a	SAMN14667516	Africa	Ghana	cerebrospinal fluid	Clinical	2016	Multiple	dfrA1, mph(E), msr(E), tet39, aacC2d	Yes
NZ_CP042995.1	A. nosocomialis	unnamed1	Rep_3	r3-T21	-	72657	J1A	SAMN12418644	Unknown	nr	Seawater	Environment	2016	None	-	No
NZ_CP061627.1	A. seifertii	pAS48-1	Rep_3	r3-T21	-	82186	AS48	SAMN16092228	Asia	Taiwan	Blood	Clinical	2010-2017	None	-	No
NZ_CP061647.1	A. seifertii	pAS39-1	Rep_3	r3-T21	-	90902	AS39	SAMN16092223	Asia	Taiwan	Blood	Clinical	2010-2017	None	-	No
CP026129.1	A. baumannii	pABA-2f10	Rep_3	r3-T21	-	130044	ABNIH28	SAMN06040401	North America	USA	wastewater	Waste water	2016	None	-	Yes
CP038501.1	A. baumannii	p3CIAT758	Rep_3	r3-T21	-	78125	CIAT758	SAMN11298775	Asia	India	blood	Clinical	2018	Multiple including carbapenem	tet39, aacA5, mph(E), msr(E), blaOXA-58	Yes
NZ_CP071772.1	A. towneri	pGX7	Rep_3	r3-T21	-	178739	GX7	SAMN16439933	Asia	China	Pig faeces	Animal	2019	Multiple including carbapenem	msr(E), mph(E), erm(B), blaOXA-58, floR, sul2, tet(X), apha7	No
NZ_CP071769.1	A. towneri	pGX5	Rep_3	r3-T21	-	178808	GX5	SAMN16439932	Asia	China	Pig faeces	Animal	2019	Multiple including carbapenem	floR, sul2, dfrA20, sul2, tet(X), apha7, msr(E), mph(E), blaOXA-58	No
NZ_CP071767.1	A. towneri	pGX3-1	Rep_3	r3-T21	-	148166	GX3	SAMN16439931	Asia	China	Pig faeces	Animal	2019	Multiple including carbapenem	aphA7, tet(X), sul2, dfrA20, sul2, floR, blaOXA-58, msr(E), mph(E)	No
NZ_CP062184.1	A. towneri	unnamed	Rep_3	r3-T21	-	186608	AT232	SAMN16178483	Asia	China	Pig faeces	Animal	2019	Multiple including carbapenem	sul2, aph(4)-Ia, aacC4, apha7, strAB, blaOXA-58, erm(B), msr(E), mph(E), floR, aadA1, sat2, dfrA1, tet(X)	No
NZ_CP048015.1	A. towneri	pAT205	Rep_3	r3-T21	-	158867	205	SAMN13864944	Asia	China	Pig faeces	Animal	2019	Multiple	strAB, tet(Y), aph(4)-Ia, aacC4, sul2, tet(X), dfrA1, sat2, aadA1, floR	No
NZ_CP046044.1	A. towneri	p19110F47-2	Rep_3	r3-T21	-	143035	19110F47	SAMN13242673	Asia	China	Pig faeces	Animal	2019	Multiple including carbapenem	msr(E), mph(E), erm(B), blaOXA-58, floR, tet(M), apha7, aacC4, aph(4)-Ia, sul2	No
CP026749.2	A. baumannii	pOXA58_005133,	Rep_3	r3-T21	-	42455	WCHAB005133	SAMN08364585	Asia	China	nr	Clinical	nr	Multiple including carbapenem	blaOXA-58, floR, sul2	Yes
NZ_CP062186.1	A. towneri	unnamed	Rep_3	r3-T21	-	124566	AT235	SAMN16178484	Asia	China	Pig faeces	Animal	2019	Multiple	aadA1, sat2, dfrA1, apha7, strAB, floR, tet(X), sul2	No
CP060995.1	A. baumannii	pCAb-65-2*	Rep_3	r3-T21	-	91773	CAb-65	SAMN15929419	Asia	Malaysia	nr	Clinical	2018	None	-	Yes
CM013137.1	A. baumannii	pAB18PR065-MCR-4.3	Rep_3	r3-T22	-	25602	AB18PR065	SAMN10662617	Asia	China	feces	Clinical	2018	Other	mcr-4	Yes
NZ_MW413305.1	A. baumannii	pLWGS0408-26	Rep_3	r3-T22	-	26839	LWGS-04-08-26	-	Europe	Germany	Slaughterhouse process water	Waste water	2018	Other	mcr-4	No
NZ_JACYVX010000081.1	A. nosocomialis	pCAC13a	Rep_3	r3-T22	-	24024	CAC13	SAMN16244549	Africa	South Africa	Blood	Clinical	2017	Other	mcr-4	No
AP025533.1	A. baumannii	pOCUAc19-2	Rep_3	r3-T23	-	10786	OCU-Ac19	SAMD00258369	Asia	Japan	Pharyngeal secretions	Clinical	2016	None	-	No
AP025538.1	A. baumannii	pOCUAc20-3	Rep_3	r3-T23	-	22130	OCU-Ac20	SAMD00414017	Asia	Japan	Pharyngeal secretions	Clinical	2016	None	-	No
NZ_CP035940.1	A. cumulans	p5_060092	Rep_3	r3-T23	-	8138	WCHAc060092	SAMN08772519	Asia	China	Sewage	Waste water	2018	None	-	No
NZ_CP032275.1	Acinetobacter sp.	p7_010034	Rep_3	r3-T23	-	10090	WCHAc010034	SAMN05356835	Asia	China	Hospital sewage	Waste water	2015	Multiple	sul2, strAB	No
CP050406.1	A. baumannii	pVB2486_3	Rep_3	r3-T23	-	12574	VB2486	SAMN14414761	Asia	India	sputum	Clinical	2019	Macrolide	mph(E), msr(E)	Yes
NZ_MDIM02000005.1	A. pittii	p5_UKK-0548	Rep_3	r3-T23	-	11025	UKK-0548	SAMN05022871	Europe	Germany	Human	Clinical	2013	Tetracycline	tet39	No
CM009033.2	A. baumannii	p1ZQ8	Rep_3	r3-T23	-	12636	ZQ8	SAMN08093367	Middle East	Iraq	blood	Clinical	2016	None	-	Yes
NC_010309.1	A. venetianus	pAV1	Rep_3	r3-T24	-	10820	VE-C3	SAMN14224534	Europe	Italy	Lagoon	Environment	1997	None	-	No
NZ_CP010356.1	A. johnsonii	pXBB1-5	Rep_3	r3-T24	-	13940	XBB1	SAMN03268929	Asia	China	Hospital sewage	Waste water	2012	None	-	No
NZ_CP028557.1	Acinetobacter sp.	p2_010045	Rep_3	r3-T24	-	7282	WCHA45	SAMN07138955	Asia	China	Sewage	Waste water	2015	None	-	No
AP024806.1	A. baumannii	pOCUAc18-4	Rep_3	r3-T24	-	8948	OCU_Ac18	SAMD00330123	Asia		blood	Clinical	2016	None	-	Yes
NZ_CP055279.1	Acinetobacter sp.	pBspH11	Rep_3	r3-T24	-	7048	NEB 394	SAMN15195663	North America	USA	Soil	Environment	1986	None	-	No
NZ_CP032006.1	A. haemolyticus	pAhaem11616d	Rep_3	r3-T24	-	6464	11616	SAMN09927968	North America	Mexico	Blood	Clinical	2012	None	-	No
NZ_CP032000.1	A. haemolyticus	pAhaemINNSZ174b	Rep_3	r3-T24	-	8634	INNSZ174	SAMN09927969	North America	Mexico	Clinical	Clinical	1998	None	-	No
NZ_CP031993.1	A. haemolyticus	pAhaem2126che	Rep_3	multi-rep	-	21807	2126ch	SAMN09927970	North America	Mexico	Ascites liquid	Clinical	2011	None	-	No
NZ_CP032281.1	Acinetobacter sp.	p2_010055	Rep_3	r3-T24	-	16361	WCHA55	SAMN07138953	Asia	China	Sewage	Waste water	2015	Multiple	msr(E), mph(E), tet39	No
NZ_CP061649.1	A. seifertii	pAS39-3	Rep_3	r3-T24	-	11979	AS39	SAMN16092223	Asia	Taiwan	Blood	Clinical	2010-2017	None	-	No
NZ_CP113446.1	A. baumannii	pC9_4	Rep_3	r3-T24	-	8916	C9	SAMN25159974	North America	USA	Draining-Matting Conveyor	Environment	2019	None	-	No
NZ_MN461227.1	A. pittii	pA352	Rep_3	r3-T24	-	13790	A352	-	Asia	China	Sputum	Clinical	nr	Carbapenem	blaOXA-72	No
CP034097.1	A. baumannii	pA52-OXA-72	Rep_3	r3-T24	-	8493	A52	SAMN10441121	Asia	China	sputum	Clinical	2015	Carbapenem	blaOXA-72	Yes
NZ_AP024709.1	Acinetobacter sp.	pTol5	Rep_3	r3-T25	-	117717	Tol 5	SAMD00324391	Asia	Japan	Activated sludge	Waste water	nr	None	-	No
NZ_CP071318.1	A. indicus	pGXNN15	Rep_3	r3-T25	-	87911	GXNN15X4	SAMN16275415	Asia	China	Pig faeces	Animal	2019	Multiple	floR, dfrA16, blaCARB-2, aadA8, sul3, tet(39), msr(E), mph(E)	No
NZ_CP019144.1	A. lwoffii	pmZS	Rep_3	r3-T25	-	198391	ZS207	SAMN06191591	Europe	Poland	Microbial mats from gold mine	Environment	2012	None	-	No
NZ_CP032290.2	A. lwoffii	pALWED3.6	Rep_3	r3-T25	-	185756	ED9-5a	SAMN05251104	Asia	Russia	Permafrost	Environment	nr	None	-	No
NZ_CP053948.1	Acinetobacter sp.	unnamed1	Rep_3	r3-T25	-	165730	WY4	SAMN14082649	Antarctica	Antarctica	nr	Unknown	2016	None	-	No
NZ_CP030755.1	A. schindleri	unnamed1	Rep_3	r3-T25	-	223569	H3	SAMN09464373	Asia	China	Condensate water on spacecraft	Environment	2012	None	-	No
NZ_CP080577.1	A. lwoffii	pALWVS1.1	Rep_3	r3-T25	-	134096	VS15	SAMN05251106	Asia	Russia	Permafrost	Environment	nr	None	-	No
NZ_JAAXYZ010000001.1	A. lwoffii	unnamed1	Rep_3	r3-T25	-	198971	FDAARGOS_620	SAMN11056335	North America	USA	Human	Clinical	nr	None	-	No
NZ_CP077370.1	A. lwoffii	unnamed1	Rep_3	r3-T25	-	121296	FDAARGOS 1394	SAMN16357536	Europe	Germany	nr	Unknown	nr	None	-	No
NZ_CP054821.1	A. lwoffii	unnamed1	Rep_3	r3-T25	-	208308	FDAARGOS_551	SAMN10163244	North America	USA	Human	Clinical	nr	None	-	No
NZ_CP054804.1	A. lwoffii	unnamed3	Rep_3	r3-T25	-	230914	FDAARGOS_557	SAMN10163181	North America	USA	Human	Clinical	nr	None	-	No
NZ_CP051209.1	Acinetobacter sp.	pMsp179	Rep_3	r3-T25	-	176422	NEB149	SAMN14567701	Unknown	nr	nr	Unknown	nr	None	-	No
NZ_CP032112.1	A. lwoffii	pALWED1.2	Rep_3	r3-T25	-	47739	ED23-35	SAMN05251102	Asia	Russia	Permafrost	Environment	nr	None	-	No
NZ_CP032102.1	A. lwoffii	pALWEK1.1	Rep_3	r3-T25	-	209982	EK30A	SAMN05251105	Asia	Russia	Permafrost	Environment	nr	None	-	No
NZ_KX426229.1	A. lwoffii	pALWED2.1	Rep_3	r3-T25	-	190039	ED45-23	SAMN05251103	Asia	Russia	Permafrost	Environment	nr	None	-	No
NZ_CP118964.1	A. lwoffii	unnamed1	Rep_3	r3-T25	-	221373	DSM 2403	SAMN33336513	Unknown	nr	Urine	Clinical	1982	None	-	No
NZ_CP077338.1	A. lwoffii	unnamed2	Rep_3	r3-T25	-	221423	FDAARGOS 1393	SAMN16357535	Europe	Germany	nr	Unknown	nr	None	-	No
NZ_CP046295.1	A. lwoffii	unnamed1	Rep_3	r3-T25	-	221520	FDAARGOS_552	SAMN10163245	North America	USA	Human	Clinical	nr	None	-	No
NZ_CP068185.1	A. johnsonii	unnamed1	Rep_3	r3-T25	-	50463	FDAARGOS_1094	SAMN16357263	Europe	Germany	nr	Unknown	nr	None	-	No
CP051863.1	A. baumannii	pAb-C102_1	Rep_3	r3-T25	-	90089	Ab-C102	SAMN14667518	Africa	Ghana	blood	Clinical	2016	Multiple including carbapenem	strB, strA, sul2, aphA1, floR, blaOXA-58	Yes
NZ_CP092086.1	A. bereziniae	unnamed	Rep_3	r3-T25	-	225959	GD03393	SAMN17007571	Asia	China	Blood	Clinical	2015	Multiple including carbapenem	blaOXA-58, msr(E), mph(E), tet39, strAB, sul2, cmlB1, msr(E), mph(E), sul2, blaNDM-1, ble-MBL, blaOXA-58, aacC2d	No
NZ_CP068202.1	A. johnsonii	unnamed1	Rep_3	r3-T25	-	183617	FDAARGOS_1092	SAMN16357261	Europe	Germany	nr	Unknown	nr	None	-	No
NZ_CP072551.1	A. lwoffii	pH7-108	Rep_3	r3-T25	-	108848	H7	SAMN18558474	Asia	China	Chicken	Animal	2016	None	-	No
CP012956.1	A. baumannii	pD36-4	Rep_3	multi-rep	-	47457	D36	SAMN04029125	Pacific	Australia	wound	Clinical	2008	Multiple	sul2, aphA1	Yes
CP051867.1	A. baumannii	pAb-C63_1	Rep_3	r3-T25	-	81353	Ab-C63	SAMN14667517	Africa	Ghana	sputum	Clinical	2016	Multiple including carbapenem	tet39, mph(E), msr(E), aphA1, aadB, blaOXA-420, strA, strB, sul2, dfrA20	Yes
NZ_CP045125.1	A. indicus	pXG-4k	Rep_3	r3-T26	-	4721	XG03	SAMN13016714	Asia	China	Cow faeces	Animal	2017	None	-	No
CP026340.1	A. baumannii	pAba810CPa	Rep_3	r3-T26	-	5281	810CP	SAMN07559626	North America	Mexico	feces	Clinical	2015	None	-	Yes
NZ_AYFZ01000080.1	A. baumannii	pABVA01	Rep_3	r3-T26*	-	8963	VA-566/00	-	Europe	Italy	Bronchoalveolar lavage fluid	Clinical	2000	Carbapenem	blaOXA-24	No
NZ_CP104655.1	A. variabilis	unnamed4	Rep_3	r3-T26	-	4872	2021CK-01005	SAMN19317614	North America	USA	Wound/Abscess	Clinical	2021	None	-	No
CP061711.1	A. baumannii	p3E072658	Rep_3	r3-T26	-	6763	E-072658	SAMN15646565	Europe	Finland	paper pulp mill	Environment	2009	None	-	Yes
NZ_MK944321.1	A. lwoffii	pAVAci147	Rep_3	r3-T26	-	4364	M2a	-	Europe	Romania	Honey	Environment	2014	None	-	No
NZ_LQXZ01000009.1	A. baumannii	unnamed	Rep_3	r3-T27	-	34424	MEX11594	SAMN04407353	North America	Mexico	Pleural fluid	Clinical	2011	None	-	No
NZ_CP103340.1	A. baumannii	unnamed3	Rep_3	r3-T27	-	50018	AB105	SAMN30068511	Asia	China	Human	Clinical	2022	None	-	No
CP034094.1	A. baumannii	pA52-2	Rep_3	r3-T27	-	27452	A52	SAMN10441121	Asia	China	sputum	Clinical	2015	None	-	Yes
CP051864.1	A. baumannii	pAb-C102_2	Rep_3	r3-T27	-	67097	Ab-C102	SAMN14667518	Africa	Ghana	blood	Clinical	2016	None	-	Yes
NZ_AP018825.1	A. ursingii	pAURM-1	Rep_3	r3-T28	-	105528	M3	SAMD00129509	Asia	Japan	Pond	Environment	2015	None	-	No
NZ_AP021937.1	A. pittii	pWP2-W18-ESBL-11_1	Rep_3	r3-T28	-	87428	WP2-W18-ESBL-11	SAMD00194360	Asia	Japan	Effluent wastewater	Waste water	2018	None	-	No
NZ_AP022303.1	Acinetobacter sp.	pBEC1-S18-ESBL-01_1	Rep_3	r3-T28	-	88315	BEC1-S18-ESBL-01	SAMD00194714	Asia	Japan	Seawater	Environment	2018	None	-	No
NZ_CP018872.1	A. haemolyticus	pAHTJS1	Rep_3	r3-T28	-	56602	TJS01	SAMN06166709	Asia	China	Respiratory sample	Clinical	2012	None	-	No
NZ_CP021429.1	A. pittii	p11	Rep_3	r3-T28	-	112604	HUMV-6483	SAMN07160582	Europe	Spain	Urine	Clinical	2008	None	-	No
NZ_CP026086.2	A. pittii	pOXA58_005069	Rep_3	r3-T28	-	112436	WCHAP005069	SAMN08382337	Asia	China	Human	Clinical	nr	Multiple including carbapenem	aaCc2d, strAB, aphA-6, strB, msr(E), mph(E), blaOXA-58	No
NZ_CP026415.1	Acinetobacter sp.	pACI-55cf	Rep_3	r3-T28	-	118501	ACNIH2	SAMN04287023	North America	USA	Wastewater	Waste water	2015	None	-	No
NZ_CP027249.2	A. pittii	pOXA58_100004	Rep_3	r3-T28	-	105591	WCHAP100004	SAMN08031286	Asia	China	Human	Clinical	2015	Multiple including carbapenem	aaCc2d, floR, sul2, strAB, aph(3')-VIb, blaPER-1, msr(E), mph(E), blaOXA-58	No
NZ_CP027253.1	A. pittii	pOXA58_100020	Rep_3	r3-T28	-	24018	WCHAP100020	SAMN08031302	Asia	China	Human	Clinical	2015	Multiple including carbapenem	msr(E), mph(E), blaOXA-58	No
NZ_CP027660.1	A. pittii	pApW20-2	Rep_3	r3-T28	-	147574	Ap-W20	SAMN08683320	Asia	China	Fish	Animal	2013	None	-	No
NZ_CP028573.2	A. pittii	pOXA58_005046	Rep_3	r3-T28	-	61751	WCHAP005046	SAMN08364583	Asia	China	Human	Clinical	nr	Multiple including carbapenem	msr(E), mph(E), blaOXA-58	No
NZ_CP029007.1	A. pittii	pAbW39-2	Rep_3	r3-T28	-	149504	AbW39	SAMN08968574	Asia	China	Fish	Animal	2013	None	-	No
NZ_CP029611.1	A. pittii	unnamed	Rep_3	r3-T28	-	84302	ST220	SAMN09259196	Asia	China	Sputum	Clinical	2017	Sulphonamide	sul2	No
NZ_CP031973.1	A. haemolyticus	pAhaemAN59c	Rep_3	r3-T28	-	82274	AN59	SAMN09927975	North America	Mexico	Peritoneal dialysis liquid	Clinical	2016	None	-	No
NZ_CP031977.1	A. haemolyticus	pAhaemAN43b	Rep_3	r3-T28	-	83559	AN43	SAMN09927974	North America	Mexico	Peritoneal dialysis liquid	Clinical	2015	None	-	No
NZ_CP031980.1	A. haemolyticus	pAhaemAN4d	Rep_3	r3-T28	-	107843	AN4	SAMN09927973	North America	Mexico	Ulcer by decubitus	Clinical	2010	None	-	No
NZ_CP031992.1	A. haemolyticus	pAhaem2126chf	Rep_3	r3-T28	-	70629	2126ch	SAMN09927970	North America	Mexico	Ascites liquid	Clinical	2011	None	-	No
NZ_CP032003.1	A. haemolyticus	pAhaem11616f	Rep_3	r3-T28	-	86699	11616	SAMN09927968	North America	Mexico	Blood	Clinical	2012	None	-	No
NZ_CP040913.1	A. pittii	pAB17H194-2	Rep_3	r3-T28	-	76962	AB17H194	SAMN10448663	Asia	China	Wound secretion	Clinical	2017	None	-	No
NZ_CP061562.1	A. seifertii	pAS73-1	Rep_3	r3-T28	-	113715	AS73	SAMN16092243	Asia	Taiwan	Blood	Clinical	2010-2017	None	-	No
NZ_CP061579.1	A. seifertii	pAS63-1	Rep_3	r3-T28	-	105830	AS63	SAMN16092239	Asia	Taiwan	Blood	Clinical	2010-2017	None	-	No
NZ_CP061584.1	A. seifertii	pAS62-2	Rep_3	r3-T28	-	105814	AS62	SAMN16092238	Asia	Taiwan	Blood	Clinical	2010-2017	None	-	No
NZ_CP061593.1	A. seifertii	pAS60-1	Rep_3	r3-T28	-	106903	AS60	SAMN16092236	Asia	Taiwan	Blood	Clinical	2010-2017	None	-	No
NZ_CP061605.1	A. seifertii	pAS53-2	Rep_3	r3-T28	-	105818	AS53	SAMN16092232	Asia	Taiwan	Blood	Clinical	2010-2017	None	-	No
NZ_CP061615.1	A. seifertii	pAS51-2	Rep_3	r3-T28	-	105861	AS51	SAMN16092230	Asia	Taiwan	Blood	Clinical	2010-2017	None	-	No
NZ_CP061622.1	A. seifertii	pAS49-2	Rep_3	r3-T28	-	105812	AS49	SAMN16092229	Asia	Taiwan	Blood	Clinical	2010-2017	None	-	No
NZ_CP061631.1	A. seifertii	pAS47-2	Rep_3	r3-T28	-	105811	AS47	SAMN16092227	Asia	Taiwan	Blood	Clinical	2010-2017	None	-	No
NZ_CP061636.1	A. seifertii	pAS41-2	Rep_3	r3-T28	-	105816	AS41	SAMN16092225	Asia	Taiwan	Blood	Clinical	2010-2017	None	-	No
NZ_CP061642.1	A. seifertii	pAS40-2	Rep_3	r3-T28	-	106923	AS40	SAMN16092224	Asia	Taiwan	Blood	Clinical	2010-2017	None	-	No
NZ_CP061661.1	A. seifertii	pAS31-1	Rep_3	r3-T28	-	105815	AS31	SAMN16092220	Asia	Taiwan	Blood	Clinical	2010-2017	None	-	No
NZ_CP061667.1	A. seifertii	pAS25-1	Rep_3	r3-T28	-	105815	AS25	SAMN16092218	Asia	Taiwan	Blood	Clinical	2010-2017	None	-	No
NZ_CP061676.1	A. seifertii	pAS17-1	Rep_3	r3-T28	-	107398	AS17	SAMN16092215	Asia	Taiwan	Blood	Clinical	2010-2017	None	-	No
NZ_CP061679.1	A. seifertii	pAS11-1	Rep_3	r3-T28	-	105815	AS11	SAMN16092214	Asia	Taiwan	Blood	Clinical	2010-2017	None	-	No
NZ_CP061682.1	A. seifertii	pAS9-1	Rep_3	r3-T28	-	108220	AS9	SAMN16092213	Asia	Taiwan	Blood	Clinical	2010-2017	None	-	No
NZ_CP061685.1	A. seifertii	pAS5-2	Rep_3	r3-T28	-	105818	AS5	SAMN16092211	Asia	Taiwan	Blood	Clinical	2010-2017	None	-	No
NZ_CP061830.1	A. seifertii	pAS42-2	Rep_3	r3-T28	-	105816	AS42	SAMN16092226	Asia	Taiwan	Blood	Clinical	2010-2017	None	-	No
NZ_CP063770.1	Acinetobacter sp.	unnamed1	Rep_3	r3-T28	-	117968	Ac-14	SAMN16550521	Asia	China	Fruit tree rhizosphere soil	Environment	2016	None	-	No
NZ_CP068181.1	A. ursingii	unnamed1	Rep_3	r3-T28	-	107360	FDAARGOS_1095	SAMN16357264	Europe	Germany	nr	Unknown	nr	None	-	No
NZ_CP087337.1	A. baumannii	p2DB053	Rep_3	r3-T28	-	102971	DB053	SAMN23078451	Europe	Germany	Human	Clinical	nr	None	-	No
NZ_CP089041.1	A. ursingii	pRIVM_C011601_3	Rep_3	r3-T28	-	109547	RIVM_C011601	SAMN23563199	Europe	Netherlands	Human	Clinical	2016	None	-	No
NZ_CP089046.1	A. ursingii	pRIVM_C010761_2	Rep_3	r3-T28	-	100542	RIVM_C010761	SAMN23563198	Europe	Netherlands	Human	Clinical	2016	None	-	No
NZ_CP095408.1	A. pittii	pTCM-1	Rep_3	r3-T28	-	84108	TCM	SAMN27485236	Asia	China	Blood	Clinical	2018	Sulphonamide	sul2	No
NZ_CP102764.1	A. baumannii	pAOR07BL-2	Rep_3	r3-T28	-	87371	AOR07-BL	SAMN30248452	Asia	China	Blood	Clinical	2020	Multiple	msr(E), mph(E), strAB, sul2, aacC2d	No
NZ_CP102936.1	Acinetobacter sp.	unnamed2	Rep_3	r3-T28	-	90740	AOR07_HL	SAMN24045741	Asia	China	Oral swab	Clinical	2020	Multiple including carbapenem	blaOXA-58, msr(E), mph(E), aacC2d, sul2, strAB	No
NZ_CP118893.1	Acinetobacter sp.	unnamed1	Rep_3	r3-T28	-	65651	TAC-1	SAMN33268550	Asia	China	Livestock manure and biogas slurry	Animal	2019	None	-	No
CP047975.1	A. baumannii	pDETAB2	Rep_3	r3-T28	-	100072	DETAB-P2	SAMN13884837	Asia	China	rectal swab	Clinical	2019	Multiple including carbapenem	aacC2d, blaOXA-58, ble-MBL, blaNDM-1, sul2, msr(E), mph(E), tet39	Yes
NZ_CP094644.1	Acinetobacter sp.	unnamed	Rep_3	r3-T28	-	153863	PK01	SAMN26805950	Asia	China	Laboratory activated sludge	Clinical	2020	None	-	No
CP098792.1	A. baumannii	p1VB280820	Rep_3	r3-T28	-	141629	280820	SAMN28980502	Asia	China	sputum	Clinical	2021	Multiple including carbapenem	aacC2d, strA, mph(E), msr(E), aphA6, blaOXA-58, sul1, blaCARB2, blaNDM-1	Yes
NZ_CP104653.1	A. variabilis	unnamed2	Rep_3	r3-T28	-	123124	2021CK-01005	SAMN19317614	North America	USA	Wound/Abscess	Clinical	2021	Multiple including carbapenem	blaOXA-58, blaNDM-1, ble-MBL, aphA6, msr(E), mph(E), strAB, aacC2d	No
NZ_MT771291.1	A. seifertii	pFA319	Rep_3	r3-T28	-	114738	FA319	-	Unknown	nr	Urinary spot	Clinical	2012	Multiple	sul1, aadA1, aacA7, blaVIM-2	No
NC_025137.1	A. pittii	pMS32-3	Rep_3	r3-T29	-	11465	MS32	SAMN14226815	Asia	Taiwan	nr	Unknown	2010	None	-	No
NZ_CP069508.1	A. pittii	unnamed4	Rep_3	r3-T29	-	11469	FDAARGOS_1215	SAMN16357357	Europe	Germany	nr	Unknown	nr	None	-	No
NZ_CP077305.1	A. pittii	unnamed2	Rep_3	r3-T29	-	11469	FDAARGOS 1396	SAMN16357538	Europe	Germany	nr	Unknown	nr	None	-	No
NZ_CP078031.1	A. variabilis	pAV_175-5	Rep_3	r3-T29	-	15472	AV_175	SAMN10248995	Asia	Pakistan	Alcohol foam dispenser in hospital intensive care unit	Clinical	2016	None	-	No
NZ_CP026422.1	Acinetobacter sp.	pACI-a283	Rep_3	r3-T29	-	13080	ACNIH1	SAMN03455971	North America	USA	Hopsital plumbing	Waste water	2014	None	-	No
CP062922.1	A. baumannii	p2Res13-Abat	Rep_3	r3-T29	-	14288	Res13-Abat-PEA21-P4-01-A	SAMN16304032	North America	Canada	swab	Clinical	2018	None	-	Yes
NZ_CP033126.1	A. wuhouensis	p6_010062	Rep_3	r3-T29	-	12655	WCHAW010062	SAMN07138954	Asia	China	Sewage	Waste water	2015	Tetracycline	tet39	No
NZ_CP083661.1	A. variabilis	unnamed3	Rep_3	r3-T29	-	13872	FDAARGOS_1487	SAMN21218843	Europe	Germany	nr	Unknown	nr	None	-	No
NZ_MK978161.1	A. lwoffii	pAVAci116	Rep_3	r3-T29	-	12740	M2a	-	Europe	Romania	Honey	Environment	2014	None	-	No
CP094287.1	A. baumannii	pNY5301-4	Rep_3	r3-T30	-	2762	NY5301	SAMN26814682	Asia	China	abdominal fluid	Clinical	2018	None	-	Yes
CP050420.1	A. baumannii	pPM193665_5	Rep_3	r3-T30	-	2762	PM193665	SAMN14420254	Asia	India	Pus	Clinical	2019	None	-	Yes
NZ_CP019152.1	A. lwoffii	pZS-20	Rep_3	r3-T31	-	14495	ZS207	SAMN06191591	Europe	Poland	Microbial mats from gold mine	Environment	2012	None	-	No
NZ_CP044480.1	A. schindleri	pHZE33-1-6	Rep_3	r3-T31	-	5952	HZE33-1	SAMN12478520	Asia	China	Goose faeces	Animal	2018	None	-	No
NZ_CP048677.1	Acinetobacter sp.	pYH12138-7	Rep_3	r3-T31	-	6280	YH12138_T	SAMN13979602	Asia	China	Pig faeces	Animal	2017	None	-	No
LN865144.1	A. baumannii	pCIP70.10	Rep_3	r3-T31	-	7742	CIP70.10	SAMEA3449716	North America	USA	Human skin	Clinical	1950	None	-	Yes
NZ_CP018873.1	A. haemolyticus	pAHTJS2	Rep_3	multi-rep	-	39508	TJS01	SAMN06166709	Asia	China	Respiratory sample	Clinical	2012	None	-	No
GU979000.1	A. baumannii	p11921	Rep_3	r3-T32	-	1103	Ab11921	-	Europe	Italy	clinical	Clinical	2010	None	-	No
NZ_MK323040.1	A. seifertii	pAs1069_a	Rep_3	multi-rep	-	24672	Asp-1069	SAMN14228624	South America	Brazil	Tracheal aspirate	Clinical	1993	Multiple including carbapenem	blaOXA-58, aphA6	No
NZ_CP015620.1	A. schindleri	p5AsACE	Rep_3	r3-T33	-	10085	ACE	SAMN04956557	North America	Mexico	Laboratory	Clinical	2013	None	-	No
NZ_CP032122.2	A. lwoffii	pALWED2.7	Rep_3	r3-T33	-	8816	ED45-23	SAMN05251103	Asia	Russia	Permafrost	Environment	nr	None	-	No
LR026974.1	A. baumannii	pKCRI-49-1	Rep_3	r3-T33	-	11681	RDK39_49	SAMEA4646219	Africa	Tanzania	wound swab	Clinical	2013	Multiple	msr(E), mph(E), tet39	Yes
NZ_CP033130.1	A. wuhouensis	pOXA23_010062	Rep_3	r3-T33	-	311749	WCHAW010062	SAMN07138954	Asia	China	Sewage	Waste water	2015	Multiple including carbapenem	aphA-6, blaOXA-23, blaOXA-58, cmlB1, msr(E), mph(E), aaCc2d	No
NZ_CP048676.1	Acinetobacter sp.	pYH12138-6	Rep_3	r3-T33	-	6871	YH12138_T	SAMN13979602	Asia	China	Pig faeces	Animal	2017	None	-	No
CP033751.1	A. baumannii	p1FDAARGOS_540	Rep_3	r3-T33	-	7181	FDAARGOS_540	SAMN10163233	North America	USA	clinical isolate	Clinical	nr	None	-	Yes
NZ_CP113445.1	A. baumannii	pC9_3	Rep_3	r3-T33	-	11964	C9	SAMN25159974	North America	USA	Draining-Matting Conveyor	Environment	2019	None	-	No
NZ_CP102937.1	Acinetobacter sp.	unnamed3	Rep_3	r3-T33	-	8571	AOR07_HL	SAMN24045741	Asia	China	Oral swab	Clinical	2020	None	-	No
NZ_CP102765.1	A. baumannii	pAOR07BL-3	Rep_3	r3-T33	-	31683	AOR07-BL	SAMN30248452	Asia	China	Blood	Clinical	2020	Carbapenem	blaOXA-58, blaOXA-58, blaOXA-58, blaOXA-58, blaOXA-58, blaOXA-58	No
NC_010310.1	A. venetianus	pAV2	Rep_3	r3-T34	-	15135	VE-C3	SAMN14224532	Europe	Italy	Lagoon	Environment	1997	None	-	No
NZ_CP016900.1	A. soli	pGFJ4	Rep_3	r3-T34	-	9416	GFJ2	SAMN05554081	Asia	Thailand	Soil	Environment	2011	None	-	No
NZ_CP089056.1	A. ursingii	pRIVM_C010559_5	Rep_3	r3-T34	-	6614	RIVM_C010559	SAMN23563197	Europe	Netherlands	Human	Clinical	2015	None	-	No
NZ_CP031974.1	A. haemolyticus	pAhaemAN59b	Rep_3	r3-T34	-	8922	AN59	SAMN09927975	North America	Mexico	Peritoneal dialysis liquid	Clinical	2016	None	-	No
NZ_CP118894.1	Acinetobacter sp.	unnamed2	Rep_3	r3-T34	-	14301	TAC-1	SAMN33268550	Asia	China	Livestock manure and biogas slurry	Animal	2019	None	-	No
CP018334.1	A. baumannii	pA1296_2	Rep_3	r3-T34	-	11586	A1296	SAMN06099024	Asia	China	sputum	Clinical	2010	Tetracycline	tet39	Yes
NZ_ALIR01000018.1	A. radioresistens	pWCA157-7.5	Rep_3	r3-T35	-	7532	WC-A-157	SAMN02436573	Middle East	Iraq	nr	Unknown	2008	None	-	No
NZ_CP044471.1	A. schindleri	pHZE23-1-8	Rep_3	r3-T35	-	6354	HZE23-1	SAMN12478518	Asia	China	Goose faeces	Animal	2018	None	-	No
NZ_CP087339.1	A. baumannii	p4DB053	Rep_3	r3-T35	-	11244	DB053	SAMN23078451	Europe	Germany	Human	Clinical	nr	None	-	No
AFDB02000003.1	A. baumannii	pNaval81-26	Rep_3	multi-rep	-	26089	Naval-81	SAMN00114928	North America	USA	nr	Environment	2006	None	-	Yes
ALII01000019.1	A. baumannii	pIS123-18	Rep_3	r3-T35	-	17984	IS-123	SAMN02436485	Middle East	Iraq	nr	Clinical	2009	None	-	Yes
KY984047.1	A. baumannii	pAb242_25	Rep_3	multi-rep	-	24808	AB242	SAMN07509424	South America	Argentina	ascitic fluid	Clinical	1997	Multiple including carbapenem	aphA6, blaOXA-58	Yes
NC_009083.1	A. baumannii	pAB1	Rep_3	r3-T37	-	13408	ATCC 17978	-	Unknown	Unknown	Unknown	Unknown	nr	None	-	No
NZ_JACGEE010000027.1	A. nosocomialis	pAC13-1	Rep_3	r3-T37	-	13476	AC13	SAMN15636488	Asia	Malaysia	Wound	Clinical	2011	Tetracycline	tet39	No
NZ_JACGEG010000028.1	A. nosocomialis	pAC25-1	Rep_3	r3-T37	-	13476	AC25	SAMN15636490	Asia	Malaysia	Wound	Clinical	2011	Tetracycline	tet39	No
NC_010395	A. baumannii	p1ABSDF	Rep_3	r3-T38	-	6106	SDF	SAMEA3138277	Europe	Unknown	Unknown	Unknown	nr	None	-	No
NZ_CP084306.1	A. pseudolwoffii	pXMC5X702-6.3k	Rep_3	r3-T39	-	6346	XMC5X702	SAMN20477963	Asia	China	Chicken faeces	Animal	2020	None	-	No
NZ_CP054825.1	A. lwoffii	unnamed4	Rep_3	r3-T40	-	7854	FDAARGOS_551	SAMN10163244	North America	USA	Human	Clinical	nr	None	-	No
NZ_JAAXYZ010000002.1	A. lwoffii	unnamed2	Rep_3	r3-T40	-	7739	FDAARGOS_620	SAMN11056335	North America	USA	Human	Clinical	nr	None	-	No
NZ_CP055278.1	Acinetobacter sp.	pBspH10	Rep_3	r3-T40	-	7073	NEB 394	SAMN15195663	North America	USA	Soil	Environment	1986	None	-	No
NZ_CP092457.1	Acinetobacter sp.	unnamed3	Rep_3	r3-T40	-	4275	AHP123	SAMN25342883	Asia	China	Activated sludge from wastewater treatment plants	Waste water	2021	None	-	No
NC_010398.1	A. baumannii	p3ABSDF	Rep_3	multi-rep	-	24922	SDF	SAMEA3138277	Europe	Unknown	Unknown	Unknown	nr	None	-	No
NZ_CP089055.1	A. ursingii	pRIVM_C010559_4	Rep_3	r3-T43	-	8618	RIVM_C010559	SAMN23563197	Europe	Netherlands	Human	Clinical	2015	None	-	No
KT346360.1	A. baumannii	pRCH52-1	Rep_3	r3-T43	-	11164	RCH52	SAMN14226727	Pacific	Australia	nr	Unknown	2009	Tetracycline	tet39	No
NZ_CP032270.1	Acinetobacter sp.	p2_010034	Rep_3	r3-T43	-	14502	WCHAc010034	SAMN05356835	Asia	China	Hospital sewage	Waste water	2015	Multiple	msr(E), mph(E), aaCc2d	No
NZ_CP045102.1	A. johnsonii	pAJ210	Rep_3	r3-T43	-	7858	AJ210	SAMN12989375	Asia	China	Urban river water	Environment	2018	Macrolide	msr(E)	No
NZ_CP045124.1	A. indicus	pXG-160kb	Rep_3	r3-T44	-	160891	XG03	SAMN13016714	Asia	China	Cow faeces	Animal	2017	Multiple	strAB, sul2	No
NZ_CP103339.1	A. baumannii	unnamed2	Rep_3	r3-T44	-	85026	AB105	SAMN30068511	Asia	China	Human	Clinical	2022	None	-	No
CP033753.1	A. baumannii	p3FDAARGOS_540	Rep_3	r3-T44	-	86551	FDAARGOS_540	SAMN10163233	North America	USA	clinical isolate	Clinical	nr	None	-	Yes
NZ_CP026426.1	Acinetobacter sp.	pACI-df08	Rep_3	r3-T45	-	257654	ACNIH1	SAMN03455971	North America	USA	Hopsital plumbing	Waste water	2014	None	-	No
NZ_CP054907.1	Acinetobacter sp.	unnamed2	Rep_3	r3-T45	-	214175	FDAARGOS_724	SAMN11056439	North America	USA	Human	Clinical	nr	None	-	No
NZ_CP104652.1	A. variabilis	unnamed1	Rep_3	r3-T45	-	185297	2021CK-01005	SAMN19317614	North America	USA	Wound/Abscess	Clinical	2021	None	-	No
CP044520.1	A. baumannii	p29FS20-1	Rep_3	r3-T45	-	66277	29FS20	SAMN12859885	Asia	China	feces	Clinical	2017	Multiple	strB, aacC2e, blaTEM, msr(E), mph(E), aphA1, sul2, strA, strB, dfrA1, floR, tet(X)	Yes
NZ_JABAGU010000003.1	Acinetobacter sp003711395	pAJ1-tetX3	Rep_3	r3-T45	-	88406	AJ-1	SAMN14564659	Asia	China	Cow	Animal	2018	Multiple including carbapenem	aacC2d, lnu(G), tet(X), ble-MBL, blaNDM-1, sul2, blaOXA-58	No
NZ_CP090315.1	Acinetobacter sp.	pYUSHP17-1	Rep_3	r3-T45	-	89040	SH20PTE17	SAMN24292272	Asia	China	Pig faeces	Animal	2020	Multiple including carbapenem	aacC2d, blaOXA-58, sul2, tet(X), apha7	No
NZ_CP045132.1	A. indicus	p18TQ-X3	Rep_3	r3-T45	-	93847	TQ18	SAMN13017013	Asia	China	Cow faeces	Animal	2017	Multiple including carbapenem	tet(X), tet(X), tet(X), tet(X), strAB, msr(E), mph(E), apha7, aaCc2d, blaOXA-58, sul2	No
NZ_CP040912.1	A. pittii	pAB17H194-1	Rep_3	r3-T45	-	88002	AB17H194	SAMN10448663	Asia	China	Wound secretion	Clinical	2017	Multiple	floR, dfrA1, strAB, sul2, aphA-6, msr(E), mph(E), blaTEM-2, aaCc2e, strB, tet(X)	No
NZ_CP039146.1	Acinetobacter sp.	p10FS3-1-3	Rep_3	r3-T45	-	73803	10FS3-1	SAMN11349729	Asia	China	Pig faeces	Animal	2015	Multiple	strAB, sul2, tet(X)	No
NZ_CP094257.1	A. indicus	pBDT2076-3	Rep_3	r3-T45	-	84924	BDT2076	SAMN26688158	Asia	China	Chicken faeces	Animal	2020	Multiple including carbapenem	aphA6, strAB, floR, tet(X), aacC2d, blaOXA-58, sul2	No
NZ_CP044019.1	A. indicus	pAI01	Rep_3	r3-T45	-	116992	HY20	SAMN11960537	Asia	China	Duck faeces	Animal	2018	Multiple including carbapenem	sul2, floR, aaCc2d, blaOXA-58, sul2, strAB, aphA-6, strB, tet(X)	No
NZ_CP048655.1	A. indicus	pC15-1	Rep_3	r3-T45	-	104003	C15_T	SAMN13979600	Asia	China	Pig faeces	Animal	2015	Multiple including carbapenem	aacC2d, aadA2, blaCARB-2, blaOXA-58, msr(E), mph(E), dfrA16	No
NZ_CP044484.1	A. schindleri	pHZE30-1-1	Rep_3	r3-T45	-	110146	HZE30-1	SAMN12478519	Asia	China	Goose faeces	Animal	2018	Multiple	blaNDM-1, ble-MBL, sul2, sul2, strAB, aphA-6, strB, floR, tet(X), tet(X)	No
NZ_CP044475.1	A. schindleri	pHZE33-1-1	Rep_3	r3-T45	-	132305	HZE33-1	SAMN12478520	Asia	China	Goose faeces	Animal	2018	Multiple	ble-MBL, blaNDM-1, aph(3')-VI, aaCc2d, dfrA16, blaCARB-2, aadA2, cmlA6, aadA1, sul1, tet(X), tet(X), floR, strB, aphA-6, strAB, sul2	No
NZ_CP044464.1	A. schindleri	pHZE23-1-1	Rep_3	r3-T45	-	138456	HZE23-1	SAMN12478518	Asia	China	Goose faeces	Animal	2018	Multiple	aph(4)-Ia, aacC4, tet(X), tet(X), floR, strAB, sul2, ble-MBL, blaNDM-1, aph(3')-VI, aaCc2d, sul1, aadA1, cmlA6, aadA2, blaCARB-2	No
NZ_CP044457.1	A. indicus	pB18-2	Rep_3	r3-T45	-	136195	B18	SAMN12429970	Asia	China	Pigeon	Animal	2016	Multiple including carbapenem	sul1, blaDHA-1, sul1, aadA1, cmlA6, aadA2, blaCARB-2, dfrA16, apha7, tet(X), floR, sul2, floR, blaOXA-58, aaCc2d	No
NZ_CP044451.1	A. indicus	pMMS9-2-1	Rep_3	r3-T45	-	121603	MMS9-2	SAMN12211923	Asia	China	Soil	Environment	2018	Multiple	blaCARB-2, dfrA16, tet(X), tet(X), floR, strAb, strB, aphA-6, sul2, ble-MBL, blaNDM-1, aph(3')-VI, aaCc2d, sul1, aadA1, cmlA6	No
NZ_CP044446.1	A. indicus	pCMG3-2-1	Rep_3	r3-T45	-	120957	CMG3-2	SAMN12211912	Asia	China	Goose faeces	Animal	2017	Multiple	tet(X), tet(X), sul1, aadA1, cmlA6, aadA2, blaCARB-2, dfrA16, aaCc2d, aph(3')-VI, blaNDM-1, ble-MBL, sul2, strAB, aphA-6, strB, floR	No
NZ_CP094556.1	Acinetobacter sp.	pYH12068-1	Rep_3	r3-T45	-	100866	YH12068_T	SAMN26993015	Asia	China	Pig faeces	Animal	2017	Multiple including carbapenem	sul2, tet(X), apha7, aacC2d, blaOXA-58	No
NZ_CP094546.1	Acinetobacter sp.	pYH16056-1	Rep_3	r3-T45	-	98709	YH16056_T	SAMN26992904	Asia	China	Soil	Environment	2016	Multiple including carbapenem	blaOXA-58, aacC2d, dfrA16, apha7, tet(X), sul2	No
NZ_CP094542.1	Acinetobacter sp.	pYH16040-1	Rep_3	r3-T45	-	87435	YH16040_T	SAMN26992838	Asia	China	Pig faeces	Animal	2016	Multiple	apha7, floR, tet(X), sul2	No
NZ_CP090865.1	Acinetobacter sp.	pNDM_SCLZS86	Rep_3	r3-T45	-	125277	SCLZS86	SAMN24593510	Asia	China	Sewage wastewater	Waste water	2019	Multiple including carbapenem	ble-MBL, blaNDM-1, tet39, msr(E), mph(E), sul2, floR, aacC2d, blaOXA-58	No
NZ_CP113443.1	A. baumannii	pC9_1	Rep_3	r3-T46	-	115742	C9	SAMN25159974	North America	USA	Draining-Matting Conveyor	Environment	2019	None	-	No
CP059551.1	A. seifertii	p5E-022166	Rep_3	r3-T46	-	198951	E-022166	SAMN15646566	Europe	Finland	Brewery	Environment		None	-	No
CP038259.1	A. baumannii	pEH_gr13	Rep_3	r3-T46	-	135229	39741	SAMN10386508	Europe	Czech Republic	Tracheal aspirate	Clinical	2018	None	-	Yes
CP042565.1	A. baumannii	pE47_009	Rep_3	r3-T47	-	2427	E47	SAMN12289292	Pacific	Australia	Hospital surfaces	Clinical	2013	None	-	Yes
CP062923.1	A. baumannii	p1Res13-Abat	Rep_3	multi-rep	-	5242	Res13-Abat-PEA21-P4-01-A	SAMN16304032	North America	Canada	swab	Clinical	2018	None	-	Yes
CP046900.1	A. baumannii	pA1429b	Rep_3	r3-T50	-	19147	A1429	SAMN13565236	Asia	China	secretion	Clinical	2010	None	-	Yes
CM009050.2	A. baumannii	p4ZQ2	Rep_3	r3-T51	-	5695	ZQ2	SAMN08093361	Middle East	Iraq	sputum	Clinical	2016	None	-	Yes
NZ_ALIR01000019.1	A. radioresistens	pWCA157-71	Rep_3	r3-T52	-	70570	WC-A-157	SAMN02436573	Middle East	Iraq	nr	Unknown	2008	None	-	No
CP053216.1	A. baumannii	p2DT0544C	Rep_3	r3-T52	-	55394	DT0544C	SAMN14833494	Africa	Tanzania	clinical	Clinical	2017	Multiple	sul2, dfrA1, sat2, aadA1, blaCARB-16, aphA1, aadB, cmlB1	Yes
NZ_CP059688.1	A. radioresistens	unnamed3	Rep_3	r3-T52	-	61168	FDAARGOS_731	SAMN11056446	North America	USA	Skin	Clinical	nr	None	-	No
NZ_CP072553.1	A. lwoffii	pH7-48	Rep_3	r3-T52	-	48843	H7	SAMN18558474	Asia	China	Chicken	Animal	2016	Other	cmlB1	No
NZ_CP089054.1	A. ursingii	pRIVM_C010559_3	Rep_3	r3-T52	-	44551	RIVM_C010559	SAMN23563197	Europe	Netherlands	Human	Clinical	2015	None	-	No
CP030107.1	A. baumannii	pDA33382-2-2	Rep_3	r3-T53	-	2372	DA33382	SAMN09460321	Europe	Germany	Tracheal secretion	Clinical	nr	None	-	Yes
CP040262.1	A. baumannii	p1P7774	Rep_3	r3-T54	-	5464	P7774	SAMN11621520	Asia	India	Pus	Clinical	2018	None	-	Yes
NZ_CP046297.1	A. lwoffii	unnamed2	Rep_3	r3-T55	-	3065	FDAARGOS_552	SAMN10163245	North America	USA	Human	Clinical	nr	None	-	No
NZ_CP077377.1	A. lwoffii	unnamed8	Rep_3	r3-T55	-	3065	FDAARGOS 1394	SAMN16357536	Europe	Germany	nr	Unknown	nr	None	-	No
NZ_CP079902.1	A. haemolyticus	unnamed2	Rep_3	r3-T55	-	3064	FDAARGOS_1392	SAMN16357534	Europe	Germany	nr	Unknown	nr	None	-	No
CP042564.1	A. baumannii	pE47_008	Rep_3	r3-T55	-	3065	E47	SAMN12289292	Pacific	Australia	Hospital surfaces	Clinical	2013	None	-	Yes
CP059555	A. seifertii	p1E-022166	Rep_3	r3-T55	-	3064	E-022166	SAMN15646566	Europe	Finland	Brewery	Environment		None	-	No
NZ_CP032128.1	A. chinensis	p2_010005	Rep_3	r3-T56	-	5433	WCHAc010005	SAMN07138949	Asia	China	Sewage	Waste water	2015	Aminoglycoside	ant(3")-IIa	No
NZ_CP044449.1	A. indicus	pCMG3-2-4	Rep_3	r3-T56	-	9322	CMG3-2	SAMN12211912	Asia	China	Goose faeces	Animal	2017	Aminoglycoside	ant(3")-IIa	No
CP050408.1	A. baumannii	pVB2486_5	Rep_3	r3-T56	-	5432	VB2486	SAMN14414761	Asia	India	sputum	Clinical	2019	Aminoglycoside	aadA1	Yes
CP023023.1	A. baumannii	pAba10324a	Rep_3	r3-T57	-	5300	10324	SAMN07520237	North America	Mexico	broncial fluid	Clinical	2012	None	-	Yes
CP034096.1	A. baumannii	pA52-4	Rep_3	r3-T58	-	3610	A52	SAMN10441121	Asia	China	sputum	Clinical	2015	None	-	Yes
NZ_CP031711.1	A. wuhouensis	p3_010060	Rep_3	r3-T59	-	12086	WCHA60	SAMN05356836	Asia	China	Hospital sewage	Waste water	2015	Multiple	tet39, strAB, sul2	No
AP023080.1	A. baumannii	pOCU_Ac16a_3	Rep_3	r3-T59	-	13096	OCU_Ac16a	SAMD00059694	Asia	Japan	tracheal aspirate	Clinical	2015	Carbapenem	blaOXA-58	Yes
CM009647.1	A. baumannii	p2ZQ2	Rep_3	r3-T60	-	12769	ZQ2	SAMN08093361	Middle East	Iraq	sputum	Clinical	2016	Macrolide	mph(E), msr(E)	Yes
NZ_CP044454.1	A. indicus	pMMS9-2-4	Rep_3	r3-T60	-	10553	MMS9-2	SAMN12211923	Asia	China	Soil	Environment	2018	None	-	No
NZ_CP094557.1	Acinetobacter sp.	pYH12068-2	Rep_3	r3-T60	-	61481	YH12068_T	SAMN26993015	Asia	China	Pig faeces	Animal	2017	Multiple	floR, sul2, tet(X), tet(Y), dfrA1, sat2, aadA1	No
NZ_CP084305.1	A. pseudolwoffii	pXMC5X702-7.6k	Rep_3	r3-T60	-	7662	XMC5X702	SAMN20477963	Asia	China	Chicken faeces	Animal	2020	Macrolide	msr(E), mph(E)	No
NZ_CP048662.1	A. piscicola	pYH12207-3	Rep_3	multi-rep	-	19920	YH12207_T	SAMN13979601	Asia	China	Pig faeces	Animal	2017	Macrolide	msr(E), mph(E)	No
NZ_CP044468.1	A. schindleri	pHZE23-1-5	Rep_3	r3-T60	-	11821	HZE23-1	SAMN12478518	Asia	China	Goose faeces	Animal	2018	Macrolide	msr(E), mph(E)	No
CP059302.1	A. baumannii	pAC1633-4	Rep_3	r3-T61	-	5210	AC1633	SAMN15574350	Asia	Malaysia	blood	Clinical	2016	None	-	Yes
NC_025171.1	Acinetobacter sp.	pM131-5	Rep_3	r3-T62	-	7641	M131	SAMN14226307	Unknown	nr	nr	Unknown	nr	None	-	No
NZ_CP015621.1	A. schindleri	p6AsACE	Rep_3	r3-T62	-	7943	ACE	SAMN04956557	North America	Mexico	Laboratory	Clinical	2013	None	-	No
NZ_CP032106.2	A. lwoffii	pALWEK1.3	Rep_3	r3-T62	-	10347	EK30A	SAMN05251105	Asia	Russia	Permafrost	Environment	nr	None	-	No
KY617771.1	A. baumannii	pS30-1	Rep_3	r3-T62	-	18234	SGH0823	SAMN14227876	Asia	Singapore	endotracheal aspiration	Clinical	2008	Multiple	tet39, msr(E), mph(E)	Yes
NZ_CP054805.1	A. lwoffii	unnamed2	Rep_3	r3-T62	-	16700	FDAARGOS_557	SAMN10163181	North America	USA	Human	Clinical	nr	None	-	No
NZ_CP032113.1	A. lwoffii	pALWED1.4	Rep_3	r3-T62	-	14118	ED23-35	SAMN05251102	Asia	Russia	Permafrost	Environment	nr	None	-	No
NZ_CP032120.2	A. lwoffii	pALWED2.5	Rep_3	r3-T62	-	11092	ED45-23	SAMN05251103	Asia	Russia	Permafrost	Environment	nr	None	-	No
NZ_CP039152.1	Acinetobacter sp.	p10FS3-1-9	Rep_3	r3-T62	-	10722	10FS3-1	SAMN11349729	Asia	China	Pig faeces	Animal	2015	None	-	No
NZ_CP072554.1	A. lwoffii	pH7-11	Rep_3	r3-T62	-	11166	H7	SAMN18558474	Asia	China	Chicken	Animal	2016	None	-	No
NZ_CP077373.1	A. lwoffii	unnamed4	Rep_3	r3-T62	-	19982	FDAARGOS 1394	SAMN16357536	Europe	Germany	nr	Unknown	nr	None	-	No
NZ_CP084302.1	A. pseudolwoffii	pXMC5X702-tetX-145k	Rep_3	multi-rep	-	145524	XMC5X702	SAMN20477963	Asia	China	Chicken faeces	Animal	2020	Multiple	msr(E), mph(E), floR, blaTEM-2, aacC2e, strB, sul2, dfrA36, tet(X), tet(X), tet(X), tet(X), lnu(G)	No
CP053221.1	A. baumannii	p1DT01139C	Rep_3	r3-T64	-	9613	DT01139C	SAMN14833556	Africa	Tanzania	clinical	Clinical	2017	None	-	Yes
NZ_CP031985.1	A. haemolyticus	pAhaemAN3c	Rep_3	r3-T65	-	35227	AN3	SAMN09927972	North America	Mexico	Peritoneal dialysis liquid	Clinical	2010	None		No
LR026973.1	A. baumannii	pKCRI-43-1	Rep_3	r3-T65	-	34935	RDK37_43	SAMEA4646218	Africa	Tanzania	wound swab	Clinical	2015	Multiple	sul2, floR	Yes
CP042559.1	A. baumannii	pE47_003	Rep_3	r3-T66	-	8795	E47	SAMN12289292	Pacific	Australia	Hospital surfaces	Clinical	2013	None	-	Yes
NZ_CP079796.1	A. johnsonii	pAJ_082-5	Rep_3	r3-T66	-	6837	AJ_082	SAMN10249157	Asia	Pakistan	Washroom sink in hospital intensive care unit	Clinical	2016	None	-	No
CP059303.1	A. baumannii	pAC1633-2	Rep_3	r3-T67	-	12651	AC1633	SAMN15574350	Asia	Malaysia	blood	Clinical	2016	Tetracycline	tet39	Yes
KY984046.1	A. baumannii	pAb242_12	Rep_3	r3-T68	-	11891	AB242	SAMN07509424	South America	Argentina	ascitic fluid	Clinical	1997	None	-	Yes
GQ861437.1	A. baumannii	p135040	Rep_3	r3-T69	-	3975	135040	-	Europe	France	clinical	Clinical	2009	Carbapenem	blaOXA-143	Yes
AP024808.1	A. baumannii	pOCUAc18-6	Rep_3	r3-T70	-	5049	OCU_Ac18	SAMD00330123	Asia	Japan	blood	Clinical	2016	None	-	Yes
AP024810.1	A. baumannii	pOCUAc18-8	Rep_3	r3-T71	-	3948	OCU_Ac18	SAMD00330123	Asia	Japan	blood	Clinical	2016	None	-	Yes
NZ_CP026417.1	Acinetobacter sp.	pACI-c6b4	Rep_3	r3-T72	-	12933	ACNIH2	SAMN04287023	North America	USA	Wastewater	Waste water	2015	Multiple	msr(E), mph(E), tet39	No
NZ_CP079797.1	A. johnsonii	pAJ_082-6	Rep_3	r3-T72	-	6562	AJ_082	SAMN10249157	Asia	Pakistan	Washroom sink in hospital intensive care unit	Clinical	2016	None	-	No
CP059544.1	A. baumannii	p2E-011922	Rep_3	r3-T72	-	11020	E-011922	SAMN15646564	Europe	Finland	paper mill kaolin	Environment	2009	None	-	Yes
NZ_CP055287.1	Acinetobacter sp.	pBspH5	Rep_3	r3-T72	-	13799	NEB 394	SAMN15195663	North America	USA	Soil	Environment	1986	None	-	No
NZ_CP113444.1	A. baumannii	pC9_2	Rep_3	r3-T72	-	17980	C9	SAMN25159974	North America	USA	Draining-Matting Conveyor	Environment	2019	None	-	No
CP061706.1	A. baumannii	p8E072658	Rep_3	multi-rep	-	119750	E-072658	SAMN15646565	Europe	Finland	paper pulp mill	Environment	2009	Other	mcr-4	Yes
CP061707.1	A. baumannii	p7E072658	Rep_3	multi-rep	-	19661	E-072658	SAMN15646565	Europe	Finland	paper pulp mill	Environment	2009	Sulphonamide	sul2	Yes
NZ_CP044476.1	A. schindleri	pHZE33-1-2	Rep_3	r3-T76	-	13080	HZE33-1	SAMN12478520	Asia	China	Goose faeces	Animal	2018	None	-	No
NZ_CP059686.1	A. radioresistens	unnamed2	Rep_3	r3-T76	-	9483	FDAARGOS_731	SAMN11056446	North America	USA	Skin	Clinical	nr	None	-	No
NZ_MK978160.1	A. lwoffii	pAVAci119	Rep_3	r3-T76	-	8751	M2a	-	Europe	Romania	Honey	Environment	2014	None	-	No
NZ_CP087302.1	A. baumannii	p2OC061	Rep_3	r3-T76	-	9738	OC061	SAMN23078462	Europe	Germany	Human	Clinical	nr	None	-	No
NZ_AP019744.1	A. radioresistens	pARA4	Rep_3	r3-T77	-	22527	NBRC 102413	SAMD00041796	Unknown	nr	nr	Unknown	nr	None	-	No
NZ_CP032138.1	Acinetobacter sp.	p1_010052	Rep_3	r3-T77	-	16399	WCHAc010052	SAMN07138952	Asia	China	Sewage	Waste water	2015	Multiple	strAB, sul2, tet39, msr(E), mph(E),	No
NZ_CP060815.1	Acinetobacter sp013417555	pXM9F202-2-13k	Rep_3	r3-T77	-	13130	XM9F202-2	SAMN15944884	Asia	China	Chicken faeces	Animal	2020	None	-	No
NZ_CP041294.1	A. indicus	p80-1-2-p3	Rep_3	r3-T77	-	9663	80-1-2	SAMN12158191	Asia	China	Cow	Animal	2019	None	-	No
CP061708.1	A. baumannii	p6E072658	Rep_3	multi-rep	-	18806	E-072658	SAMN15646565	Europe	Finland	paper pulp mill	Environment	2009	None	-	Yes
NZ_CP113447.1	A. baumannii	pC9_5	Rep_3	r3-T78	-	5870	C9	SAMN25159974	North America	USA	Draining-Matting Conveyor	Environment	2019	None	-	No
CP087596.1	A. baumannii	pAb01-2	Rep_3	r3-T78	-	5870	SHOU-Ab01	SAMN23235066	Asia	China	Andrias davidianus	Animal	2021	None	-	Yes
NZ_JAPHLB020000019.1	A. baumannii	pT190_5	Rep_3	r3-T78	-	5870	T190	SAMN25160020	North America	USA	Draining-Matting Conveyor	Environment	2019	None	-	No
NZ_CP022301.1	A. johnsonii	pIC001C	Rep_3	r3-T93	-	6970	IC001	SAMN07298690	Asia	Japan	River	Environment	2003	None	-	No
NZ_CP094543.1	Acinetobacter sp.	pYH16040-2	Rep_3	r3-T93	-	7295	YH16040_T	SAMN26992838	Asia	China	Pig faeces	Animal	2016	None	-	No
NZ_CP035937.1	A. cumulans	p2_060092	Rep_3	r3-T93	-	18761	WCHAc060092	SAMN08772519	Asia	China	Sewage	Waste water	2018	Multiple	strAB, msr(E), mph(E), tet39, sul2	No
NZ_CP032274.1	Acinetobacter sp.	p6_010034	Rep_3	r3-T93	-	10922	WCHAc010034	SAMN05356835	Asia	China	Hospital sewage	Waste water	2015	Beta lactam	blaMCA	No
NZ_CP031975.1	A. haemolyticus	pAhaemAN59a	Rep_3	r3-T93	-	6725	AN59	SAMN09927975	North America	Mexico	Peritoneal dialysis liquid	Clinical	2016	None	-	No
NZ_CP031978.1	A. haemolyticus	pAhaemAN43a	Rep_3	r3-T93	-	6681	AN43	SAMN09927974	North America	Mexico	Peritoneal dialysis liquid	Clinical	2015	None	-	No
NZ_CP080637.1	A. lwoffii	pALWEK1.13	Rep_3	r3-T93	-	8910	EK30A	SAMN05251105	Asia	Russia	Permafrost	Environment	nr	None	-	No
NZ_CP080639.1	A. lwoffii	pALWEK1.5	Rep_3	r3-T93	-	8227	EK30A	SAMN05251105	Asia	Russia	Permafrost	Environment	nr	None	-	No
NZ_CP102100.1	Acinetobacter sp000369645	p214-1	Rep_3	r3-T93	-	10411	C-214	SAMN30058931	Asia	Malaysia	Faeces	Clinical	2018	Tetracycline	tet39	No
NZ_AP019742.1	A. radioresistens	pARA2	Rep_3	r3-T80	-	77605	NBRC 102413	SAMD00041796	Unknown	nr	nr	Unknown	nr	None	-	No
NZ_CP038023.1	A. radioresistens	pAR1	Rep_3	r3-T80	-	88584	DD78	SAMN11179230	South America	Chile	Soil	Environment	2008	None	-	No
NZ_CP039145.1	Acinetobacter sp.	p10FS3-1-2	Rep_3	r3-T80	-	75189	10FS3-1	SAMN11349729	Asia	China	Pig faeces	Animal	2015	None	-	No
NZ_CP041296.1	A. indicus	p80-1-2-p2	Rep_3	r3-T80	-	39796	80-1-2	SAMN12158191	Asia	China	Cow	Animal	2019	None	-	No
NZ_CP025619.2	A. schindleri	pSGAir0122	Rep_3	r3-T80	-	156230	SGAir0122	SAMN08222738	Asia	Singapore	Air	Environment	2014	None	-	No
NZ_CP026617.1	Acinetobacter sp.	pSWBY1	Rep_3	r3-T80	-	38161	SWBY1	SAMN08449481	Asia	China	Hospital sewage	Waste water	2017	Multiple	msr(E), mph(E), aph(3')-VI, blaNDM-1, ble-MBL	No
NZ_CP032268.1	Acinetobacter sp.	p1_010034	Rep_3	multi-rep	-	66814	WCHAc010034	SAMN05356835	Asia	China	Hospital sewage	Waste water	2015	None	-	No
NZ_CP072552.1	A. lwoffii	pH7-68	Rep_3	r3-T80	-	68402	H7	SAMN18558474	Asia	China	Chicken	Animal	2016	None	-	No
NZ_CP032284.1	Acinetobacter sp.	pNDM1_010055	Rep_3	r3-T80	-	71326	WCHA55	SAMN07138953	Asia	China	Sewage	Waste water	2015	Multiple	ble-MBL, blaNDM-1	No
NZ_CP096123.1	A. faecalis	pJNE5-OXA-58	Rep_3	r3-T80	-	59583	JNE5	SAMN27668265	Asia	China	Milking environment	Environment	2021	Multiple including carbapenem	blaOXA-58, aacC2d	No
NZ_CP046043.1	A. towneri	p19110F47-1	Rep_3	r3-T80	-	47094	19110F47	SAMN13242673	Asia	China	Pig faeces	Animal	2019	Multiple	ble-MBL, blaNDM-1, aph(3')-VI, aaCc2d	No
NZ_KT965092.1	A. towneri	pNDM-GJ01	Rep_3	r3-T80	-	30293	G165	SAMN14226394	Asia	China	Faeces	Clinical	2011	Multiple	blaNDM-1, ble-MBL	No
NZ_CP048661.1	A. piscicola	pYH12207-2	Rep_3	r3-T80	-	148815	YH12207_T	SAMN13979601	Asia	China	Pig faeces	Animal	2017	Multiple	tet(X), aphA7, tet(X), sul2	No
NZ_CP059685.1	A. radioresistens	unnamed1	Rep_3	r3-T80	-	58767	FDAARGOS_731	SAMN11056446	North America	USA	Skin	Clinical	nr	None	-	No
NZ_CP059687.1	A. radioresistens	unnamed5	Rep_3	r3-T80	-	27601	FDAARGOS_731	SAMN11056446	North America	USA	Skin	Clinical	nr	None	-	No
NZ_CP119225.1	A. proteolyticus	pAP54-2	Rep_3	r3-T80	-	107216	AP54	SAMN33546470	Asia	Taiwan	Blood	Clinical	1997	None	-	No
NZ_CP032104.1	A. lwoffii	pALWEK1.11	Rep_3	r3-T81	-	8399	EK30A	SAMN05251105	Asia	Russia	Permafrost	Environment	nr	None	-	No
NZ_CP032282.1	Acinetobacter sp.	p3_010055	Rep_3	multi-rep	-	14838	WCHA55	SAMN07138953	Asia	China	Sewage	Waste water	2015	None	-	No
NZ_CP044469.1	A. schindleri	pHZE23-1-6	Rep_3	r3-T81	-	7346	HZE23-1	SAMN12478518	Asia	China	Goose faeces	Animal	2018	Macrolide	msr(E), mph(E)	No
NZ_CP044477.1	A. schindleri	pHZE33-1-3	Rep_3	r3-T81	-	11416	HZE33-1	SAMN12478520	Asia	China	Goose faeces	Animal	2018	Macrolide	msr(E), mph(E)	No
NZ_CP044487.1	A. schindleri	pHZE30-1-4	Rep_3	r3-T81	-	14179	HZE30-1	SAMN12478519	Asia	China	Goose faeces	Animal	2018	Tetracycline	tet39	No
NZ_CP048667.1	A. piscicola	pYH12207-8	Rep_3	r3-T81	-	8185	YH12207_T	SAMN13979601	Asia	China	Pig faeces	Animal	2017	None	-	No
NZ_JALGQY010000058.1	A. lwoffii	unnamed2	Rep_3	r3-T81	-	5918	K1	SAMN27057513	Europe	Slovakia	Mud	Environment	2010	None	-	No
NZ_CP068188.1	A. johnsonii	unnamed3	Rep_3	r3-T82	-	82024	FDAARGOS_1094	SAMN16357263	Europe	Germany	nr	Unknown	nr	None	-	No
NZ_CP055285.1	Acinetobacter sp.	pBspH3	Rep_3	r3-T82	-	85229	NEB 394	SAMN15195663	North America	USA	Soil	Environment	1986	None	-	No
NZ_CP026423.1	Acinetobacter sp.	pACI-b25a	Rep_3	r3-T82	-	40249	ACNIH1	SAMN03455971	North America	USA	Hopsital plumbing	Waste water	2014	None	-	No
NZ_CP018261.1	A. haemolyticus	pXH901	Rep_3	r3-T82	-	54698	XH900	SAMN06066183	Asia	China	Blood	Clinical	2016	None	-	No
NZ_CP068177.1	A. ursingii	unnamed2	Rep_3	r3-T82	-	74837	FDAARGOS_1096	SAMN16357265	Europe	Germany	nr	Unknown	nr	None	-	No
NZ_CP068182.1	A. ursingii	unnamed2	Rep_3	r3-T82	-	75090	FDAARGOS_1095	SAMN16357264	Europe	Germany	nr	Unknown	nr	None	-	No
NZ_CP019146.1	A. lwoffii	pZS-6	Rep_3	r3-T83	-	6691	ZS207	SAMN06191591	Europe	Poland	Microbial mats from gold mine	Environment	2012	None	-	No
NZ_CP032109.1	A. lwoffii	pALWEK1.7	Rep_3	r3-T83	-	6691	EK30A	SAMN05251105	Asia	Russia	Permafrost	Environment	nr	None	-	No
NZ_CP032114.1	A. lwoffii	pALWED1.5	Rep_3	r3-T83	-	6711	ED23-35	SAMN05251102	Asia	Russia	Permafrost	Environment	nr	None	-	No
NZ_CP046299.1	A. lwoffii	unnamed4	Rep_3	r3-T83	-	6691	FDAARGOS_552	SAMN10163245	North America	USA	Human	Clinical	nr	None	-	No
NZ_CP054905.1	Acinetobacter sp.	unnamed4	Rep_3	r3-T83	-	6693	FDAARGOS_724	SAMN11056439	North America	USA	Human	Clinical	nr	None	-	No
NZ_CP077235.1	A. pittii	unnamed3	Rep_3	r3-T83	-	6715	FDAARGOS 1397	SAMN16357539	Europe	Germany	nr	Unknown	nr	None	-	No
NZ_CP080580.1	A. lwoffii	pALWVS1.4	Rep_3	r3-T83	-	11964	VS15	SAMN05251106	Asia	Russia	Permafrost	Environment	nr	None	-	No
NZ_MK944320.1	A. lwoffii	pAVAci84	Rep_3	r3-T83	-	14155	M2a	-	Europe	Romania	Honey	Environment	2014	None	-	No
NC_025120.1	Acinetobacter sp.	pM131-6	Rep_3	r3-T84	-	7610	M131	SAMN14226308	Unknown	nr	nr	Unknown	nr	None	-	No
NZ_CP113448.1	A. baumannii	pC9_6	Rep_3	r3-T84	-	5053	C9	SAMN25159974	North America	USA	Draining-Matting Conveyor	Environment	2019	None	-	No
NZ_JAPHLB020000020.1	A. baumannii	pT190_6	Rep_3	r3-T84	-	5053	T190	SAMN25160020	North America	USA	Draining-Matting Conveyor	Environment	2019	None	-	No
NZ_CP041298.1	A. indicus	p80-1-2-p4	Rep_3	r3-T84	-	5574	80-1-2	SAMN12158191	Asia	China	Cow	Animal	2019	None	-	No
NZ_CP044491.1	A. schindleri	pHZE30-1-8	Rep_3	r3-T84	-	6317	HZE30-1	SAMN12478519	Asia	China	Goose faeces	Animal	2018	None	-	No
NZ_CP010353.1	A. johnsonii	pXBB1-2	Rep_3	r3-T84	-	4724	XBB1	SAMN03268929	Asia	China	Hospital sewage	Waste water	2012	None	-	No
NZ_CP019151.1	A. lwoffii	pZS-13	Rep_3	r3-T85	-	6168	ZS207	SAMN06191591	Europe	Poland	Microbial mats from gold mine	Environment	2012	None	-	No
NZ_CP032110.2	A. lwoffii	pALWEK1.8	Rep_3	r3-T85	-	5324	EK30A	SAMN05251105	Asia	Russia	Permafrost	Environment	nr	None	-	No
NZ_CP084309.1	A. pseudolwoffii	pXMC5X702-5k	Rep_3	r3-T85	-	5001	XMC5X702	SAMN20477963	Asia	China	Chicken faeces	Animal	2020	None	-	No
NZ_CP054824.1	A. lwoffii	unnamed2	Rep_3	r3-T85	-	4779	FDAARGOS_551	SAMN10163244	North America	USA	Human	Clinical	nr	None	-	No
NZ_CP054906.1	Acinetobacter sp.	unnamed3	Rep_3	r3-T85	-	5819	FDAARGOS_724	SAMN11056439	North America	USA	Human	Clinical	nr	None	-	No
NZ_CP118967.1	A. lwoffii	unnamed4	Rep_3	r3-T85	-	5879	DSM 2403	SAMN33336513	Unknown	nr	Urine	Clinical	1982	None	-	No
NZ_CP077340.1	A. lwoffii	unnamed4	Rep_3	r3-T85	-	5879	FDAARGOS 1393	SAMN16357535	Europe	Germany	nr	Unknown	nr	None	-	No
NZ_CP031999.1	A. haemolyticus	pAhaemINNSZ174c	Rep_3	r3-T85	-	9485	INNSZ174	SAMN09927969	North America	Mexico	Clinical	Clinical	1998	None	-	No
NZ_CP046298.1	A. lwoffii	unnamed3	Rep_3	r3-T85	-	6573	FDAARGOS_552	SAMN10163245	North America	USA	Human	Clinical	nr	None	-	No
NZ_CP026418.1	Acinetobacter sp.	pKPC-8dee	Rep_3	r3-T86	-	43928	ACNIH2	SAMN04287023	North America	USA	Wastewater	Waste water	2015	Multiple	msr(E), mph(E), tet39, blaKPC-2, blaGES-17, aac(6')-Ib-G, sul1	No
NZ_CP033125.1	A. wuhouensis	p5_010062	Rep_3	r3-T86	-	12698	WCHAW010062	SAMN07138954	Asia	China	Sewage	Waste water	2015	Multiple	mph(E), tet39	No
NZ_CP083949.1	A. johnsonii	unnamed2	Rep_3	r3-T86	-	8607	CSUSB1	SAMN21540781	North America	USA	Garden soil	Environment	2019	None	-	No
NZ_CP045100.1	A. johnsonii	pAJ14	Rep_3	r3-T86	-	7979	AJ14	SAMN12989374	Asia	China	Urban river water	Environment	2018	None	-	No
NZ_CP079795.1	A. johnsonii	pAJ_082-4	Rep_3	r3-T86	-	6903	AJ_082	SAMN10249157	Asia	Pakistan	Washroom sink in hospital intensive care unit	Clinical	2016	None	-	No
NZ_CP029391.2	A. defluvii	p3_010030	Rep_3	r3-T87	-	5017	WCHA30	SAMN05356262	Asia	China	Sewage	Waste water	2015	None	-	No
NZ_CP032107.1	A. lwoffii	pALWEK1.4	Rep_3	r3-T87	-	8635	EK30A	SAMN05251105	Asia	Russia	Permafrost	Environment	nr	None	-	No
NZ_CP032140.1	Acinetobacter sp.	p3_010052	Rep_3	r3-T87	-	5025	WCHAc010052	SAMN07138952	Asia	China	Sewage	Waste water	2015	None	-	No
NZ_CP048679.1	Acinetobacter sp.	pYH12138-9	Rep_3	r3-T87	-	5358	YH12138_T	SAMN13979602	Asia	China	Pig faeces	Animal	2017	None	-	No
NZ_MF078635.1	A. pittii	pLS535	Rep_3	r3-T87	-	11388	HGSA535	SAMN14227751	Europe	Portugal	Exsudate of hip infection	Clinical	2012	Carbapenem	blaOXA-58	No
NZ_CP026416.1	Acinetobacter sp.	pACI-3569	Rep_3	r3-T88	-	127843	ACNIH2	SAMN04287023	North America	USA	Wastewater	Waste water	2015	None	-	No
NZ_CP048660.1	A. piscicola	pYH12207-1	Rep_3	multi-rep	-	184101	YH12207_T	SAMN13979601	Asia	China	Pig faeces	Animal	2017	None	-	No
NZ_CP048671.1	Acinetobacter sp.	pYH12138-1	Rep_3	r3-T88	-	207449	YH12138_T	SAMN13979602	Asia	China	Pig faeces	Animal	2017	None	-	No
NZ_CP090068.1	Acinetobacter sp.	pYUSHP14-1	Rep_3	r3-T88	-	187536	SH20PTE14	SAMN24291981	Asia	China	Pig faeces	Animal	2020	Multiple	sul2, tet(X), floR, strAB	No
NZ_CP083948.1	A. johnsonii	unnamed1	Rep_3	r3-T89	-	84108	CSUSB1	SAMN21540781	North America	USA	Garden soil	Environment	2019	None	-	No
NZ_CP089040.1	A. ursingii	pRIVM_C011601_2	Rep_3	r3-T89	-	125695	RIVM_C011601	SAMN23563199	Europe	Netherlands	Human	Clinical	2016	None	-	No
NZ_CP089048.1	A. ursingii	pRIVM_C010761_4	Rep_3	r3-T89	-	90792	RIVM_C010761	SAMN23563198	Europe	Netherlands	Human	Clinical	2016	None	-	No
NZ_CP093969.1	Acinetobacter sp.	pACI	Rep_3	r3-T89	-	101829	LUNF3	SAMN26570487	Asia	China	Landfill soil	Environment	2019	None	-	No
NZ_CP015616.1	A. schindleri	p1AsACE	Rep_3	r3-T90	-	179461	ACE	SAMN04956557	North America	Mexico	Laboratory	Clinical	2013	None	-	No
NZ_CP060812.1	Acinetobacter sp013417555	pXM9F202-2-186k	Rep_3	r3-T90	-	186242	XM9F202-2	SAMN15944884	Asia	China	Chicken faeces	Animal	2020	Multiple	tet(M), sul2, apha7, aph(3')-Ib, strAB, aacC2d, msr(E), mph(E), floR	No
NZ_CP076604.1	A. schindleri	unnamed	Rep_3	r3-T90	-	166835	MCDA01	SAMN19459915	Asia	China	Marine mud	Environment	2019	None	-	No
NZ_CP078028.1	A. variabilis	pAV_175-2	Rep_3	r3-T90	-	196965	AV_175	SAMN10248995	Asia	Pakistan	Alcohol foam dispenser in hospital intensive care unit	Clinical	2016	None	-	No
NZ_AP018826.1	A. ursingii	pAURM-2	Rep_3	r3-T91	-	33916	M3	SAMD00129509	Asia	Japan	Pond	Environment	2015	None	-	No
NZ_CP028798.2	A. junii	p1_010059	Rep_3	r3-T91	-	33869	WCHAJ59	SAMN07138956	Asia	China	Sewage	Waste water	2015	Multiple	aaCc2d, tet39, msr(E), mph(E)	No
NZ_CP087718.1	A. pittii	pAP2044-2	Rep_3	r3-T91	-	43577	AP2044	SAMN23335262	Asia	China	Hydrothorax	Clinical	2020	Multiple	msr(E), mph(E), tet39, cmlB1, sul2, strAB	No
NZ_CP044465.1	A. schindleri	pHZE23-1-2	Rep_3	r3-T92	-	34862	HZE23-1	SAMN12478518	Asia	China	Goose faeces	Animal	2018	None	-	No
NZ_CP077339.1	A. lwoffii	unnamed3	Rep_3	r3-T92	-	55306	FDAARGOS 1393	SAMN16357535	Europe	Germany	nr	Unknown	nr	None	-	No
NZ_CP118965.1	A. lwoffii	unnamed2	Rep_3	r3-T92	-	55306	DSM 2403	SAMN33336513	Unknown	nr	Urine	Clinical	1982	None	-	No
NZ_CP031983.1	A. haemolyticus	pAhaemAN4a	Rep_3	r3-T79	-	4281	AN4	SAMN09927973	North America	Mexico	Ulcer by decubitus	Clinical	2010	None	-	No
NZ_CP031997.1	A. haemolyticus	pAhaem2126cha	Rep_3	r3-T79	-	4280	2126ch	SAMN09927970	North America	Mexico	Ascites liquid	Clinical	2011	None	-	No
NZ_CP019145.1	A. lwoffii	pZS-3	Rep_3	r3-T94	-	13816	ZS207	SAMN06191591	Europe	Poland	Microbial mats from gold mine	Environment	2012	None	-	No
NZ_CP026424.1	Acinetobacter sp.	pACI-148e	Rep_3	r3-T94	-	18295	ACNIH1	SAMN03455971	North America	USA	Hopsital plumbing	Waste water	2014	None	-	No
NZ_CP032105.2	A. lwoffii	pALWEK1.2	Rep_3	r3-T94	-	12284	EK30A	SAMN05251105	Asia	Russia	Permafrost	Environment	nr	None	-	No
NZ_CP032124.2	A. lwoffii	pALWED2.9	Rep_3	r3-T95	-	6308	ED45-23	SAMN05251103	Asia	Russia	Permafrost	Environment	nr	None	-	No
NZ_CP055281.1	Acinetobacter sp.	pBspH13	Rep_3	r3-T95	-	6257	NEB 394	SAMN15195663	North America	USA	Soil	Environment	1986	None	-	No
NZ_CP068186.1	A. johnsonii	unnamed2	Rep_3	r3-T95	-	7913	FDAARGOS_1094	SAMN16357263	Europe	Germany	nr	Unknown	nr	None	-	No
NZ_CP032267.1	Acinetobacter sp.	p10_010034	Rep_3	r3-T96	-	3470	WCHAc010034	SAMN05356835	Asia	China	Hospital sewage	Waste water	2015	None	-	No
NZ_CP080643.1	A. lwoffii	pALWEK1.16	Rep_3	r3-T96	-	2621	EK30A	SAMN05251105	Asia	Russia	Permafrost	Environment	nr	None	-	No
NZ_CP104657.1	A. variabilis	unnamed6	Rep_3	r3-T96	-	2621	2021CK-01005	SAMN19317614	North America	USA	Wound/Abscess	Clinical	2021	None	-	No
NZ_AP019748.1	A. radioresistens	pARA8	Rep_3	r3-T97	-	4376	NBRC 102413	SAMD00041796	Unknown	nr	nr	Unknown	nr	None	-	No
NZ_CP102102.1	Acinetobacter sp000369645	p214-3	Rep_3	r3-T97	-	8305	C-214	SAMN30058931	Asia	Malaysia	Faeces	Clinical	2018	None	-	No
NZ_CP098481.1	Acinetobacter sp.	pAspC32I	Rep_3	r3-T97	-	8308	C32I	SAMN28658291	Asia	China	Frog skin	Animal	2012	None	-	No
NZ_CP061563.1	A. seifertii	pAS73-2	Rep_3	r3-T97	-	14469	AS73	SAMN16092243	Asia	Taiwan	Blood	Clinical	2010-2017	None	-	No
NZ_CP061597.1	A. seifertii	pAS59-1	Rep_3	r3-T97	-	7444	AS59	SAMN16092235	Asia	Taiwan	Blood	Clinical	2010-2017	None	-	No
NZ_MN481287.1	A. pittii	pA2949	Rep_3	r3-T97	-	10886	A2949	-	Asia	China	Sputum	Clinical	nr	Carbapenem	blaOXA-72	No
NZ_CP015112.1	Acinetobacter sp.	unnamed2	Rep_3	r3-T98	-	8682	TGL-Y2	SAMN04002505	Asia	China	Frozen soil	Environment	2011	None	-	No
NZ_CP032273.1	Acinetobacter sp.	p5_010034	Rep_3	r3-T99	-	11378	WCHAc010034	SAMN05356835	Asia	China	Hospital sewage	Waste water	2015	None	-	No
NZ_CP045136.1	A. indicus	pXG01-X3	Rep_3	r3-T99	-	103629	XG01	SAMN13016659	Asia	China	Cow faeces	Animal	2017	Multiple	floR, tet(X), sul2, aph(3')-VI, blaNDM-1, ble-MBL, aadA1, sat2, lnu(F)	No
NZ_CP045107.1	A. johnsonii	pAJ4134	Rep_3	r3-T99	-	8543	AJ413	SAMN12989377	Asia	China	Urban river water	Environment	2018	None	-	No
NZ_CP032287.2	A. lwoffii	pALWED3.2	Rep_3	r3-T99	-	15656	ED9-5a	SAMN05251104	Asia	Russia	Permafrost	Environment	nr	None	-	No
NZ_CP051211.1	Acinetobacter sp.	pMsp22	Rep_3	r3-T99	-	21992	NEB149	SAMN14567701	Unknown	nr	nr	Unknown	nr	None	-	No
NZ_CP035939.1	A. cumulans	p4_060092	Rep_3	r3-T99	-	9699	WCHAc060092	SAMN08772519	Asia	China	Sewage	Waste water	2018	Tetracycline	tet39	No
NZ_CP118895.1	Acinetobacter sp.	unnamed3	Rep_3	r3-T99	-	11749	TAC-1	SAMN33268550	Asia	China	Livestock manure and biogas slurry	Animal	2019	None	-	No
NZ_CP010351.1	A. johnsonii	pXBB1-9	Rep_3	multi-rep	-	398857	XBB1	SAMN03268929	Asia	China	Hospital sewage	Waste water	2012	Multiple including carbapenem	strAB, tet(Y), arr-3, aac(6')-Ib4, sul1, blaPER-1, sul1, aphA-6, aaCc2d, cmlB1, msr(E), mph(E), blaOXA-58	No
NZ_CP038010.1	A. haemolyticus	pAHTJR1	Rep_3	r3-T100	-	306131	TJR01	SAMN11157875	Asia	China	Respiratory patient	Clinical	2012	Multiple including carbapenem	strAB, tet(Y), apha7, sul2, arr-3, aac(6')-Ib4, sul1, blaPER-1, sul1, aphA-6, blaOXA-58, msr(E), mph(E), floR	No
NZ_CP096121.1	A. faecalis	pJNE5-X3_NDM-1	Rep_3	r3-T100	-	333311	JNE5	SAMN27668265	Asia	China	Milking environment	Environment	2021	Multiple	blaCARB-16, aacC2d, msr(E), mph(E), strAB, tet(X), ble-MBL, blaNDM-1, sul2, lnu(G), aphA6	No
NZ_CP113451.1	A. baumannii	pC9_9	Rep_3	r3-T101	-	2214	C9	SAMN25159974	North America	USA	Draining-Matting Conveyor	Environment	2019	None	-	No
NZ_JAPHLB020000024.1	A. baumannii	pT190_10	Rep_3	r3-T101	-	2214	T190	SAMN25160020	North America	USA	Draining-Matting Conveyor	Environment	2019	None	-	No
NZ_CP024012.1	Acinetobacter sp.	unnamed1	Rep_3	r3-T102	-	179399	LoGeW2-3	SAMN06111671	Europe	Germany	White stork pellet	Animal	2015	None	-	No
NZ_CP084301.1	A. pseudolwoffii	pXMC5X702-195k	Rep_3	r3-T103	-	195429	XMC5X702	SAMN20477963	Asia	China	Chicken faeces	Animal	2020	None	-	No
NZ_CP096122.1	A. faecalis	pJNE5-64k	Rep_3	r3-T103	-	64629	JNE5	SAMN27668265	Asia	China	Milking environment	Environment	2021	None	-	No
NZ_CP038011.1	A. haemolyticus	pAHTJR2	Rep_3	r3-T104	-	13835	TJR01	SAMN11157875	Asia	China	Respiratory patient	Clinical	2012	None	-	No
NZ_CP044488.1	A. schindleri	pHZE30-1-5	Rep_3	r3-T104	-	8408	HZE30-1	SAMN12478519	Asia	China	Goose faeces	Animal	2018	None	-	No
NZ_CP045123.1	A. indicus	pXG-13k	Rep_3	r3-T105	-	13496	XG03	SAMN13016714	Asia	China	Cow faeces	Animal	2017	None	-	No
NZ_CP045134.1	A. indicus	p18TQ-13k	Rep_3	r3-T105	-	13580	TQ18	SAMN13017013	Asia	China	Cow faeces	Animal	2017	None	-	No
NZ_CP077341.1	A. lwoffii	unnamed5	Rep_3	r3-T106	-	2845	FDAARGOS 1393	SAMN16357535	Europe	Germany	nr	Unknown	nr	None	-	No
NZ_CP118968.1	A. lwoffii	unnamed5	Rep_3	r3-T106	-	2845	DSM 2403	SAMN33336513	Unknown	nr	Urine	Clinical	1982	None	-	No
NZ_CP031995.1	A. haemolyticus	pAhaem2126chc	Rep_3	r3-T107	-	6950	2126ch	SAMN09927970	North America	Mexico	Ascites liquid	Clinical	2011	None	-	No
NZ_CP032005.1	A. haemolyticus	pAhaem11616c	Rep_3	r3-T107	-	6950	11616	SAMN09927968	North America	Mexico	Blood	Clinical	2012	None	-	No
NZ_CP113450.1	A. baumannii	pC9_8	Rep_3	r3-T108	-	2297	C9	SAMN25159974	North America	USA	Draining-Matting Conveyor	Environment	2019	None	-	No
NZ_JAPHLB020000023.1	A. baumannii	pT190_9	Rep_3	r3-T108	-	2297	T190	SAMN25160020	North America	USA	Draining-Matting Conveyor	Environment	2019	None	-	No
NZ_CP045106.1	A. johnsonii	pAJ4133	Rep_3	r3-T109	-	10529	AJ413	SAMN12989377	Asia	China	Urban river water	Environment	2018	None	-	No
NZ_CP045105.1	A. johnsonii	pAJ4132	Rep_3	r3-T109	-	10689	AJ413	SAMN12989377	Asia	China	Urban river water	Environment	2018	None	-	No
NZ_CP068178.1	A. ursingii	unnamed3	Rep_3	r3-T110	-	5483	FDAARGOS_1096	SAMN16357265	Europe	Germany	nr	Unknown	nr	None	-	No
NZ_CP073242.1	A. soli	pM3-1-68	Rep_3	r3-T110	-	201182	M3-1-68	SAMN18781099	Asia	China	Parrot	Animal	2018	None	-	No
NZ_ON109139.1	A. lwoffii	pALK1	Rep_3	r3-T111	-	3051	K1	-	Europe	Slovakia	Brown mud disposal site	Environment	nr	None	-	No
NZ_JALGQY010000067.1	A. lwoffii	pALK1	Rep_3	r3-T111	-	3051	K1	SAMN27057513	Europe	Slovakia	Mud	Environment	2010	None	-	No
NZ_CP048675.1	Acinetobacter sp.	pYH12138-5	Rep_3	r3-T112	-	7078	YH12138_T	SAMN13979602	Asia	China	Pig faeces	Animal	2017	None	-	No
NZ_CP090069.1	Acinetobacter sp.	pYUSHP14-2	Rep_3	r3-T112	-	9905	SH20PTE14	SAMN24291981	Asia	China	Pig faeces	Animal	2020	None	-	No
NZ_CP044448.1	A. indicus	pCMG3-2-3	Rep_3	r3-T113	-	11746	CMG3-2	SAMN12211912	Asia	China	Goose faeces	Animal	2017	Other	floR	No
NZ_MH999418.1	Acinetobacter sp.	unnamed	Rep_3	r3-T113	-	10690	SWBY1	SAMN14227986	Asia	China	Hospital sewage	Waste water	nr	None	-	No
NZ_JABAGU010000006.1	Acinetobacter sp003711395	pAJ1_4	Rep_3	r3-T114	-	10676	AJ-1	SAMN14564659	Asia	China	Cow	Animal	2018	None	-	No
NZ_CP043308.1	A. johnsonii	pAcsw19-1	Rep_3	r3-T115	-	11161	Acsw19	SAMN12630603	Asia	China	Sewage	Waste water	2019	None	-	No
NZ_CP060814.1	Acinetobacter sp013417555	pXM9F202-2-17k	Rep_3	r3-T116	-	17496	XM9F202-2	SAMN15944884	Asia	China	Chicken faeces	Animal	2020	None	-	No
NZ_CP032118.2	A. lwoffii	pALWED2.3	Rep_3	r3-T116	-	22769	ED45-23	SAMN05251103	Asia	Russia	Permafrost	Environment	nr	None	-	No
NZ_CP055283.1	Acinetobacter sp.	pBspH1	Rep_3	r3-T117	-	9444	NEB 394	SAMN15195663	North America	USA	Soil	Environment	1986	None	-	No
NZ_CP010354.1	A. johnsonii	pXBB1-3	Rep_3	r3-T118	-	11643	XBB1	SAMN03268929	Asia	China	Hospital sewage	Waste water	2012	None	-	No
NZ_CP055286.1	Acinetobacter sp.	pBspH4	Rep_3	r3-T119	-	14653	NEB 394	SAMN15195663	North America	USA	Soil	Environment	1986	None	-	No
NZ_AP024800.1	A. pittii	pOCUAc17-2	Rep_3	r3-T119	-	15601	OCU Ac17	SAMD00330122	Asia	Japan	Blood	Clinical	nr	None	-	No
NZ_AP019741.1	A. radioresistens	pARA1	Rep_3	multi-rep	-	240231	NBRC 102413	SAMD00041796	Unknown	nr	nr	Unknown	nr	None	-	No
NZ_CP077234.1	A. pittii	unnamed2	Rep_3	r3-T121	-	39975	FDAARGOS 1397	SAMN16357539	Europe	Germany	nr	Unknown	nr	None	-	No
NZ_CP016898.1	A. soli	pGFJ2	Rep_3	r3-T124	-	78649	GFJ2	SAMN05554081	Asia	Thailand	Soil	Environment	2011	None	-	No
NZ_JADKPY010000001.1	Acinetobacter sp.	pSK-43	Rep_3	r3-T125	-	242504	SK-43	SAMN16598147	Pacific	Australia	Gold particles	Environment	2017	None	-	No
NZ_CP015111.1	Acinetobacter sp.	unnamed1	Rep_3	multi-rep	-	298877	TGL-Y2	SAMN04002505	Asia	China	Frozen soil	Environment	2011	None	-	No
NZ_CP016897.1	A. soli	pGFJ1	Rep_3	r3-T128	-	86373	GFJ2	SAMN05554081	Asia	Thailand	Soil	Environment	2011	None	-	No
NZ_CP041297.1	A. indicus	p80-1-2-tetX3	Rep_3	r3-T129	-	53584	80-1-2	SAMN12158191	Asia	China	Cow	Animal	2019	Multiple including carbapenem	tet(X), sul2, aphA-6, strAB, blaOXA-58	No
NZ_CP079749.1	A. bouvetii	pMRA	Rep_3	r3-T130	-	71994	MR1	SAMN20179280	Asia	China	Water	Environment	2019	Multiple	strAB, tet(A)	No
NZ_CP090384.1	A. towneri	pNDM_SCLZS30	Rep_3	r3-T131	-	47845	SCLZS30	SAMN24582573	Asia	China	Sewage wastewater	Waste water	2019	Multiple including carbapenem	ble-MBL, blaNDM-1, aph(3')-VI, blaOXA-58, aacC2d, tet39, msr(E), mph(E)	No
NZ_CP032276.1	Acinetobacter sp.	p8_010034	Rep_3	r3-T133	-	8540	WCHAc010034	SAMN05356835	Asia	China	Hospital sewage	Waste water	2015	None	-	No
NZ_MK944318.1	A. lwoffii	pAVAci145	Rep_3	r3-T134	-	4381	M2a	-	Europe	Romania	Honey	Environment	2014	None	-	No
NZ_CP039151.1	Acinetobacter sp.	p10FS3-1-8	Rep_3	r3-T135	-	12036	10FS3-1	SAMN11349729	Asia	China	Pig faeces	Animal	2015	None	-	No
NZ_CP028799.2	A. junii	p2_010059	Rep_3	r3-T136	-	6074	WCHAJ59	SAMN07138956	Asia	China	Sewage	Waste water	2015	None	-	No
NZ_CP035942.1	A. cumulans	p7_060092	Rep_3	r3-T137	-	2123	WCHAc060092	SAMN08772519	Asia	China	Sewage	Waste water	2018	None	-	No
NZ_CP084308.1	A. pseudolwoffii	pXMC5X702-5.2k	Rep_3	r3-T138	-	5259	XMC5X702	SAMN20477963	Asia	China	Chicken faeces	Animal	2020	None	-	No
NZ_CP032269.1	Acinetobacter sp.	p11_010034	Rep_3	r3-T139	-	2817	WCHAc010034	SAMN05356835	Asia	China	Hospital sewage	Waste water	2015	None	-	No
NZ_CP055288.1	Acinetobacter sp.	pBspH6	Rep_3	r3-T140	-	13036	NEB 394	SAMN15195663	North America	USA	Soil	Environment	1986	None	-	No
NZ_CP089057.1	A. ursingii	pRIVM_C010559_6	Rep_3	r3-T141	-	4640	RIVM_C010559	SAMN23563197	Europe	Netherlands	Human	Clinical	2015	None	-	No
NZ_CP098733.1	A. tibetensis	unnamed	Rep_3	r3-T142	-	8632	Y-23	SAMN28192584	Asia	China	Soil	Environment	2021	None	-	No
NZ_JABAGU010000005.1	Acinetobacter sp003711395	pAJ1_3	Rep_3	r3-T143	-	14987	AJ-1	SAMN14564659	Asia	China	Cow	Animal	2018	None	-	No
NZ_CP078029.1	A. variabilis	pAV_175-3	Rep_3	r3-T144	-	19844	AV_175	SAMN10248995	Asia	Pakistan	Alcohol foam dispenser in hospital intensive care unit	Clinical	2016	None	-	No
NZ_CP089042.1	A. ursingii	pRIVM_C011601_4	Rep_3	r3-T145	-	2360	RIVM_C011601	SAMN23563199	Europe	Netherlands	Human	Clinical	2016	None	-	No
NZ_CP032271.1	Acinetobacter sp.	p3_010034	Rep_3	r3-T146	-	13204	WCHAc010034	SAMN05356835	Asia	China	Hospital sewage	Waste water	2015	None	-	No
NZ_CP039148.1	Acinetobacter sp.	p10FS3-1-5	Rep_3	r3-T147	-	16045	10FS3-1	SAMN11349729	Asia	China	Pig faeces	Animal	2015	None	-	No
NZ_CP048664.1	A. piscicola	pYH12207-5	Rep_3	r3-T148	-	12678	YH12207_T	SAMN13979601	Asia	China	Pig faeces	Animal	2017	None	-	No
NZ_CP026413.1	Acinetobacter sp.	pACI-35f6	Rep_3	r3-T149	-	11959	ACNIH2	SAMN04287023	North America	USA	Wastewater	Waste water	2015	None	-	No
NZ_CP044479.1	A. schindleri	pHZE33-1-5	Rep_3	r3-T150	-	6415	HZE33-1	SAMN12478520	Asia	China	Goose faeces	Animal	2018	Tetracycline	tet39	No
NZ_CP068189.1	A. johnsonii	unnamed4	Rep_3	r3-T151	-	8393	FDAARGOS_1094	SAMN16357263	Europe	Germany	nr	Unknown	nr	None	-	No
NZ_CP015148.1	A. pittii	pIEC338SC3	Rep_3	r3-T152	-	5813	IEC338SC	SAMN04576523	South America	Brazil	Tracheal secretion	Clinical	2014	None	-	No
NZ_CP020001.1	A. calcoaceticus	pCA16	Rep_3	r3-T153	-	5920	CA16	SAMN06197019	North America	Canada	Canola Roots	Environment	2015	None	-	No
NZ_CP033119.1	A. wuhouensis	p1_010062	Rep_3	r3-T154	-	50181	WCHAW010062	SAMN07138954	Asia	China	Sewage	Waste water	2015	None	-	No
NZ_CP032115.1	A. lwoffii	pALWED1.6	Rep_3	r3-T155	-	5596	ED23-35	SAMN05251102	Asia	Russia	Permafrost	Environment	nr	None	-	No
NZ_CP029394.2	A. defluvii	p6_010030	Rep_3	r3-T156	-	3063	WCHA30	SAMN05356262	Asia	China	Sewage	Waste water	2015	None	-	No
NZ_CP031990.1	A. haemolyticus	pAhaem5227a	Rep_3	r3-T157	-	5723	5227	SAMN09927971	North America	Mexico	Blood	Clinical	2014	None	-	No
NZ_CP044489.1	A. schindleri	pHZE30-1-6	Rep_3	r3-T158	-	7333	HZE30-1	SAMN12478519	Asia	China	Goose faeces	Animal	2018	Macrolide	msr(E), mph(E)	No
NZ_CP054806.1	A. lwoffii	unnamed1	Rep_3	r3-T159	-	5628	FDAARGOS_557	SAMN10163181	North America	USA	Human	Clinical	nr	None	-	No
NZ_CP089049.1	A. ursingii	pRIVM_C010761_6	Rep_3	r3-T160	-	5174	RIVM_C010761	SAMN23563198	Europe	Netherlands	Human	Clinical	2016	None	-	No
NZ_JABAGU010000008.1	Acinetobacter sp003711395	pAJ1_5	Rep_3	r3-T161	-	7081	AJ-1	SAMN14564659	Asia	China	Cow	Animal	2018	None	-	No
NZ_JABAGU010000010.1	Acinetobacter sp003711395	pAJ1_7	Rep_3	r3-T162	-	4222	AJ-1	SAMN14564659	Asia	China	Cow	Animal	2018	None	-	No
NZ_CP010352.1	A. johnsonii	pXBB1-1	Rep_3	r3-T163	-	3978	XBB1	SAMN03268929	Asia	China	Hospital sewage	Waste water	2012	None	-	No
NZ_CP015147.1	A. pittii	pIEC338SC2	Rep_3	r3-T164	-	5562	IEC338SC	SAMN04576523	South America	Brazil	Tracheal secretion	Clinical	2014	None	-	No
NZ_CP016903.1	A. soli	pGFJ7	Rep_3	r3-T165	-	4008	GFJ2	SAMN05554081	Asia	Thailand	Soil	Environment	2011	None	-	No
NZ_CP087338.1	A. baumannii	p3DB053	Rep_3	r3-T167	-	32159	DB053	SAMN23078451	Europe	Germany	Human	Clinical	nr	None	-	No
NZ_CM012186.1	A. bereziniae	pAbe229-9	Rep_3	r3-T168	-	9154	HPC229	SAMN04115377	South America	Argentina	Blood	Clinical	2014	None	-	No
NZ_CP010357.1	A. johnsonii	pXBB1-6	Rep_3	r3-T169	-	13330	XBB1	SAMN03268929	Asia	China	Hospital sewage	Waste water	2012	None	-	No
NZ_CP030758.1	A. schindleri	unnamed4	Rep_3	r3-T170	-	6462	H3	SAMN09464373	Asia	China	Condensate water on spacecraft	Environment	2012	None	-	No
NZ_CP032280.1	Acinetobacter sp.	p1_010055	Rep_3	r3-T171	-	71539	WCHA55	SAMN07138953	Asia	China	Sewage	Waste water	2015	None	-	No
NZ_CP033118.1	A. wuhouensis	p10_010062	Rep_3	r3-T172	-	4283	WCHAW010062	SAMN07138954	Asia	China	Sewage	Waste water	2015	None	-	No
NZ_CP055290.1	Acinetobacter sp.	pBspH8	Rep_3	r3-T173	-	10333	NEB 394	SAMN15195663	North America	USA	Soil	Environment	1986	None	-	No
NZ_JAPHLB020000022.1	A. baumannii	pT190_8	Rep_3	r3-T174	-	3779	T190	SAMN25160020	North America	USA	Draining-Matting Conveyor	Environment	2019	None	-	No
NZ_CP033124.1	A. wuhouensis	p4_010062	Rep_3	r3-T175	-	15012	WCHAW010062	SAMN07138954	Asia	China	Sewage	Waste water	2015	None	-	No
NZ_CP084310.1	A. pseudolwoffii	pXMC5X702-4.4k	Rep_3	r3-T176	-	4440	XMC5X702	SAMN20477963	Asia	China	Chicken faeces	Animal	2020	None	-	No
NZ_CP104654.1	A. variabilis	unnamed3	Rep_3	r3-T177	-	6631	2021CK-01005	SAMN19317614	North America	USA	Wound/Abscess	Clinical	2021	None	-	No
NZ_CP030757.1	A. schindleri	unnamed3	Rep_3	r3-T178	-	29258	H3	SAMN09464373	Asia	China	Condensate water on spacecraft	Environment	2012	None	-	No
NC_025119.1	Acinetobacter sp.	pM131-8	Rep_3	r3-T179	-	5414	M131	SAMN14226310	Unknown	nr	nr	Unknown	nr	None	-	No
NZ_CP033120.1	A. wuhouensis	p11_010062	Rep_3	r3-T180	-	3984	WCHAW010062	SAMN07138954	Asia	China	Sewage	Waste water	2015	None	-	No
NZ_CP029389.2	A. defluvii	p1_010030	Rep_3	r3-T181	-	76885	WCHA30	SAMN05356262	Asia	China	Sewage	Waste water	2015	None	-	No
NZ_CP039150.1	Acinetobacter sp.	p10FS3-1-7	Rep_3	r3-T182	-	12304	10FS3-1	SAMN11349729	Asia	China	Pig faeces	Animal	2015	None	-	No
NZ_CP044453.1	A. indicus	pMMS9-2-3	Rep_3	r3-T183	-	12422	MMS9-2	SAMN12211923	Asia	China	Soil	Environment	2018	None	-	No
NZ_CP044481.1	A. schindleri	pHZE33-1-7	Rep_3	r3-T184	-	5887	HZE33-1	SAMN12478520	Asia	China	Goose faeces	Animal	2018	None	-	No
NZ_CP055291.1	Acinetobacter sp.	pBspH9	Rep_3	r3-T185	-	8955	NEB 394	SAMN15195663	North America	USA	Soil	Environment	1986	None	-	No
NZ_CP018142.1	A. larvae	pRW2	Rep_3	r3-T186	-	8455	BRTC-1	SAMN05520995	Asia	China	Insect	Animal	2015	None	-	No
NZ_CP031715.1	A. wuhouensis	p7_010060	Rep_3	r3-T187	-	5009	WCHA60	SAMN05356836	Asia	China	Hospital sewage	Waste water	2015	None	-	No
NZ_CP032119.1	A. lwoffii	pALWED2.4	Rep_3	r3-T188	-	10584	ED45-23	SAMN05251103	Asia	Russia	Permafrost	Environment	nr	None	-	No
NZ_CP027661.1	A. pittii	pApW20-3	Rep_3	r3-T189	-	8123	Ap-W20	SAMN08683320	Asia	China	Fish	Animal	2013	None	-	No
NZ_CP032283.1	Acinetobacter sp.	p4_010055	Rep_3	r3-T190	-	5624	WCHA55	SAMN07138953	Asia	China	Sewage	Waste water	2015	None	-	No
NZ_CP101116.1	Acinetobacter sp.	unnamed1	Rep_3	r3-T191	-	10205	Z1	SAMN29174474	Asia	China	Piggery wastewater	Waste water	2021	None	-	No
NZ_MK323041.1	A. seifertii	pAs1069_b	Rep_3	r3-T192	-	13129	Asp-1069	SAMN14228623	South America	Brazil	Tracheal aspirate	Clinical	1993	None	-	No
NZ_CP055289.1	Acinetobacter sp.	pBspH7	Rep_3	r3-T193	-	12103	NEB 394	SAMN15195663	North America	USA	Soil	Environment	1986	None	-	No
NZ_CP041366.1	A. kanungonis	p1	Rep_3	r3-T194	-	11449	SE63	SAMN12228392	Asia	China	Mangrove wetland	Environment	2013	None	-	No
NZ_CP035941.1	A. cumulans	p6_060092	Rep_3	r3-T196	-	4692	WCHAc060092	SAMN08772519	Asia	China	Sewage	Waste water	2018	None	-	No
NZ_CP102101.1	Acinetobacter sp000369645	p214-2	Rep_3	r3-T197	-	5509	C-214	SAMN30058931	Asia	Malaysia	Faeces	Clinical	2018	None	-	No
NZ_JABAGU010000004.1	Acinetobacter sp003711395	pAJ1_2	Rep_3	r3-T198	-	22731	AJ-1	SAMN14564659	Asia	China	Cow	Animal	2018	None	-	No
NZ_AP019743.1	A. radioresistens	pARA3	Rep_3	r3-T199	-	29910	NBRC 102413	SAMD00041796	Unknown	nr	nr	Unknown	nr	None	-	No
NZ_CP087315.1	A. baumannii	p3OC059	Rep_3	r3-T200	-	14545	OC059	SAMN23078459	Europe	Germany	Human	Clinical	nr	None	-	No
AB823544.1	A. baumannii	pAB-NCGM253	Rep_3	r3-T1	-	8970	NCGM 253	SAMN14229301	Asia	Japan	clinical	Clinical	2012	Carbapenem	blaOXA-72	Yes
AEOY01000096.1	A. baumannii	p2ABST2	Rep_3	r3-T1	-	21846	3990	SAMN02471598	Europe	Italy	unknown	Environment	2006	Carbapenem	blaOXA-58	Yes
AEOZ01000236.1	A. baumannii	p1ABST78	Rep_3	r3-T1	-	26411	3909	SAMN02471606	Europe	Italy	unknown	Unknown	nr	Carbapenem	blaOXA-58	Yes
AEPA01000396.1	A. baumannii	p2ABST25	Rep_3	r3-T1	-	8970	4190	SAMN02471587	Europe	Italy	clinical	Clinical	2009	Carbapenem	blaOXA-72	Yes
AFCZ02000003.1	A. baumannii	pOIFC032-101	Rep_3	r3-T3	-	101298	OIFC032	SAMN00114924	Europe	Germany	unknown	Environment	2003	None	-	Yes
AFDB02000005.1	A. baumannii	pNaval81-13	Rep_3	r3-T23	-	12634	Naval-81	SAMN00114928	North America	USA	unknown	Environment	2006	None	-	Yes
AFDL01000005.1	A. baumannii	pOIFC143-2.3	Rep_3	r3-T15	-	2277	OIFC143	SAMN02436631	North America	USA	unknown	Unknown	2003	None	-	Yes
AFDL01000007.1	A. baumannii	pOIFC143-6.2	Rep_3	r3-T5	-	6241	AR_0056	SAMN04014897	North America	USA	unknown	Clinical	2003	None	-	Yes
AFDM01000010.1	A. baumannii	pOIFC189-111	Rep_3	r3-T3	-	110967	OIFC189	SAMN00114925	Europe	Germany	unknown	Environment	2003	None	-	Yes
AFDN01000003.1	A. baumannii	pCanadaBC5-8.7	Rep_3	r3-T1	-	8731	Canada BC-5	SAMN02436468	North America	Canada	unknown	Clinical	2007	None	-	Yes
AFDO01000021.1	A. baumannii	pNaval17-13	Rep_3	r3-T23	-	12636	Naval-17	SAMN02436551	North America	USA	unknown	Unknown	2006	None	-	Yes
ALII01000018.1	A. baumannii	pIS123-12	Rep_3	r3-T12	-	11600	IS-123	SAMN02436485	Middle East	Iraq	unknown	Clinical	2009	None	-	Yes
AP024803.1	A. baumannii	pOCUAc18-1	Rep_3	r3-T44	-	90090	OCU_Ac18	SAMD00330123	Asia	Japan	blood	Clinical	2016	None	-	Yes
AP024804.1	A. baumannii	pOCUAc18-2	Rep_3	r3-T6	-	12817	OCU_Ac18	SAMD00330123	Asia	Japan	blood	Clinical	2016	None	-	Yes
AP024805.1	A. baumannii	pOCUAc18-3	Rep_3	r3-T67	-	10831	OCU_Ac18	SAMD00330123	Asia	Japan	blood	Clinical	2016	None	-	Yes
AP024807.1	A. baumannii	pOCUAc18-5	Rep_3	r3-T2	-	7104	OCU_Ac18	SAMD00330123	Asia	Japan	blood	Clinical	2016	None	-	Yes
AP024813.1	A. baumannii	pOCUAc18-11	Rep_3	r3-T15	-	2278	OCU_Ac18	SAMD00330123	Asia	Japan	blood	Clinical	2016	None	-	Yes
AYEX01000118.1	A. baumannii	pABUH6a-8.8	Rep_3	r3-T1	-	8763	CBA7	SAMN06650245	Asia	South Korea	sputum	Clinical	2013	None	-	Yes
AYFH01000057.1	A. baumannii	pABUH2b-5.4	Rep_3	r3-T26	-	5355	UH7607	SAMN02597386	North America	USA	urine	Clinical	2007	None	-	Yes
AYFI01000019.1	A. baumannii	pABUH6b-10	Rep_3	r3-T2	-	10030	A388	SAMN07736509	Africa	Greece	unknown	Clinical	2002	None	-	Yes
AYFW01000101.1	A. baumannii	pABUH4-111	Rep_3	r3-T3	-	111007	UH2107	SAMN02597401	North America	USA	sputum	Clinical	2007	None	-	Yes
AYFZ01000080.2	A. baumannii	pABUH2a-5.6	Rep_3	r3-T26*	-	5636	UH19608	SAMN02597404	North America	USA	urine	Clinical	2008	Carbapenem	blaOXA-24	Yes
AYFZ01000083.1	A. baumannii	pABUH3b-7.8	Rep_3	r3-T6	-	7819	UH19608	SAMN02597404	North America	USA	urine	Clinical	2008	None	-	Yes
AYOI01000002.1	A. baumannii	pABUH5-114	Rep_3	r3-T9	-	114115	UH10707	SAMN02597423	North America	USA	sputum	Clinical	2007	Macrolide	mph(E), msr(E)	Yes
CM003314.1	A. baumannii	pMRSN7339-8.7	Rep_3	r3-T1	-	8731	MRSN 7339	SAMN02906929	North America	USA	wound	Clinical	2004	None	-	Yes
CM003317.1	A. baumannii	pMRSN58-8.7	Rep_3	r3-T1	-	8731	MRSN 58	SAMN02906928	North America	USA	wound	Clinical	2010	None	-	Yes
CM003741.1	A. baumannii	p2MEX11594	Rep_3	r3-T1	-	5557	MEX11594	SAMN04407353	North America	Mexico	Pleural fluid	Clinical	2011	None	-	Yes
CM003909.1	A. baumannii	pAB0057	Rep_3	r3-T1	-	8781	AB210M	SAMN03450127	North America	USA	laboratory	Clinical	2012	None	-	Yes
CM004453.1	A. baumannii	p1M3AC14-8	Rep_3	r3-T18	-	5441	M3AC14-8	SAMN03699770	South America	Puerto Rico	skin	Clinical	2014	None	-	Yes
CM009035.2	A. baumannii	p3ZQ8	Rep_3	r3-T6	-	11034	ZQ8	SAMN08093367	Middle East	Iraq	blood	Clinical	2016	None	-	Yes
CM009036.2	A. baumannii	p1ZQ7	Rep_3	r3-T4	-	11191	ZQ7	SAMN08093366	Middle East	Iraq	sputum	Clinical	2016	None	-	Yes
CM009038.2	A. baumannii	p1ZQ6	Rep_3	r3-T1	-	8905	ZQ6	SAMN08093365	Middle East	Iraq	wound swab	Clinical	2016	None	-	Yes
CM009043.2	A. baumannii	p2ZQ5	Rep_3	r3-T1	-	8731	ZQ5	SAMN08093364	Middle East	Iraq	wound swab	Clinical	2016	None	-	Yes
CM009046.2	A. baumannii	p2ZQ4	Rep_3	r3-T6	-	13311	ZQ4	SAMN08093363	Middle East	Iraq	blood	Clinical	2016	None	-	Yes
CM009049.2	A. baumannii	p1ZQ2	Rep_3	r3-T3	-	110967	ZQ2	SAMN08093361	Middle East	Iraq	sputum	Clinical	2016	None	-	Yes
CM009083.3	A. baumannii	p1ZQ9	Rep_3	multi-rep	-	35194	ZQ9	SAMN08093368	Middle East	Iraq	blood	Clinical	2016	Multiple	tet39, mph(E), msr(E), armA	Yes
CM009646.1	A. baumannii	p3ZQ10	Rep_3	r3-T15	-	2277	ZQ10	SAMN08093369	Middle East	Iraq	cerebrospinal fluid	Clinical	2016	None	-	Yes
CM009651.1	A. baumannii	p5ZQ3	Rep_3	r3-T11	-	16470	ZQ3	SAMN08093362	Middle East	Iraq	blood	Clinical	2016	None	-	Yes
CM009924.1	A. baumannii	pAba70743_1	Rep_3	r3-T1	-	10880	CCUG 70743	SAMN07602915	Europe	Sweden	wound	Clinical	2012	Carbapenem	blaOXA-72	Yes
CM012225.1	A. baumannii	pAB13-41	Rep_3	r3-T4	-	11194	PIMB13AB-41	SAMN07815360	Asia	Vietnam	Nasotracheal aspiration	Clinical	2013	None	-	Yes
CP000522.1	A. baumannii	pAB1	Rep_3	r3-T37	-	13408	ATCC 17978	SAMN02604331	North America	USA	Urine	Clinical	1951	None	-	Yes
CP000523.1	A. baumannii	pAB2	Rep_3	r3-T1	-	11302	ATCC 17978	SAMN02604331	North America	USA	Urine	Clinical	1951	None	-	Yes
CP000864.1	A. baumannii	pACICU1	Rep_3	multi-rep	-	28279	ACICU	SAMN02603140	Europe	Italy	blood	Clinical	2001	None	-	Yes
CP001183.2	A. baumannii	pAB0057	Rep_3	r3-T1	-	8731	AB0057	SAMN02603051	North America	USA	blood	Clinical	2004	None	-	Yes
CP002523.1	A. baumannii	p1ABTCDC0715	Rep_3	r3-T1	-	8731	TCDC-AB0715	SAMN02603891	Asia	Taiwan	bacteremia	Clinical	2007-2009	None	-	Yes
CP003850.1	A. baumannii	p1BJAB0868	Rep_3	r3-T1	-	8721	BJAB0868	SAMN02604246	Asia	China	ascites	Clinical	2007-2008	None	-	Yes
CP003968.1	A. baumannii	pD1279779	Rep_3	r3-T5	-	7416	D1279779	SAMN02603576	Pacific	Australia	clinical	Clinical	2009	None	-	Yes
CP004359.1	A. baumannii	pABTJ2	Rep_3	r3-T3	-	110967	MDR-TJ	SAMN02603104	Asia	China	clinical	Clinical	2009	None	-	Yes
CP006769.1	A. baumannii	ZW85p2	Rep_3	r3-T3	-	113866	ZW85-1	SAMN02641530	Asia	China	feces	Clinical	2011	Multiple	sul2, tet(B)	Yes
CP006964.1	A. baumannii	pPKAB07	Rep_3	r3-T1	-	8805	AB07	SAMN03081512	Asia	India	wound	Clinical	2011	None	-	Yes
CP007550.1	A. baumannii	pAC12	Rep_3	r3-T1	-	8731	AC12	SAMN02471420	Asia	Malaysia	blood	Clinical	2011	None	-	Yes
CP007578.1	A. baumannii	pAC30a	Rep_3	r3-T1	-	8685	AC30	SAMN02471421	Asia	Malaysia	endotracheal secretion	Clinical	2011	None	-	Yes
CP007713.1	A. baumannii	pABLAC1	Rep_3	r3-T5	-	8006	LAC-4	SAMN02709859	North America	USA	nosocomial outbreak- site not listed	Clinical	1997	None	-	Yes
CP008708.1	A. baumannii	p2AB5075	Rep_3	r3-T1	-	8731	AB5075-UW	SAMN02894434	North America	USA	tibia/osteomyelitis of diabetes patient	Clinical	2008	None	-	Yes
CP008850.1	A. baumannii	pAC29a	Rep_3	r3-T1	-	8737	AC29	SAMN02714232	Asia	Malaysia	endotracheal secretion	Clinical	2011	None	-	Yes
CP010398.1	A. baumannii	p6200-114.848kb	Rep_3	r3-T3	-	114848	6200	SAMN03263969	South America	Colombia	bodily fluid	Clinical	2012	None	-	Yes
CP010780.1	A. baumannii	pAB386	Rep_3	r3-T3	-	112157	XH386	SAMN03290686	Asia	China	Lower respiratory tract	Clinical	2014	None	-	Yes
CP010782.1	A. baumannii	pA1-1	Rep_3	r3-T1	-	8731	A1	SAMN03248539	Europe	United Kingdom	clinical	Clinical	1982	None	-	Yes
CP014293.1	A. baumannii	p1AB34299	Rep_3	r3-T1	-	15645	AB34299	SAMN04457967	North America	USA	nosocomial infection	Clinical	2015	None	-	Yes
CP015122.1	A. baumannii	pab736	Rep_3	r3-T4	-	9539	ab736	SAMN04621185	North America	USA	unknown	Clinical	2015	None	-	Yes
CP015484.1	A. baumannii	pORAB01-1	Rep_3	r3-T3	-	110965	ORAB01	SAMN03277095	North America	USA	bodily fluid	Clinical	2012	None	-	Yes
CP016296.1	A. baumannii	pCMCVTAb1-Ab4	Rep_3	r3-T3	-	110968	CMC-CR-MDR-Ab4	SAMN04096368	North America	USA	BAL	Clinical	2009	None	-	Yes
CP016299.1	A. baumannii	pCMCVTAb1-Ab59	Rep_3	r3-T3	-	110967	CMC-MDR-Ab59	SAMN04096369	North America	USA	sputum	Clinical	2010	None	-	Yes
CP016301.1	A. baumannii	pCMCVTAb1-Ab66	Rep_3	r3-T3	-	110967	CMC-CR-MDR-Ab66	SAMN04096370	North America	USA	TA	Clinical	2010	None	-	Yes
CP018255.1	A. baumannii	pAF-401	Rep_3	r3-T5	-	17583	AF-401	SAMN06077191	North America	Mexico	Small Colon	Clinical	2009	Carbapenem	blaOXA-235	Yes
CP018257.1	A. baumannii	pAF-673	Rep_3	r3-T3	-	110964	AF-673	SAMN06077192	North America	USA	sputum	Clinical	2008	None	-	Yes
CP018678.1	A. baumannii	pALAC4-1	Rep_3	r3-T5	-	8006	LAC4	SAMN05362953	North America	USA	nosocomial outbreak- site not listed	Clinical	1997	None	-	Yes
CP020576.1	A. baumannii	pSSA12_2	Rep_3	r3-T1	-	8730	SSA12	SAMN06650263	Asia	South Korea	blood	Clinical	2013	None	-	Yes
CP020585.1	A. baumannii	pCBA7_1	Rep_3	r3-T3	-	111999	CBA7	SAMN06650245	Asia	South Korea	sputum	Clinical	2013	None	-	Yes
CP021786.1	A. baumannii	pA85-2	Rep_3	r3-T1	-	8731	A85	SAMN07125723	Pacific	Australia	sputum	Clinical	2003	None	-	Yes
CP022284.1	A. baumannii	pAba7804a	Rep_3	r3-T17	-	12381	7804	SAMN07289440	North America	Mexico	bronchoalveolar lavage fluid	Clinical	2006	Carbapenem	blaOXA-58	Yes
CP023021.1	A. baumannii	pAba9201a	Rep_3	r3-T8	-	9024	9201	SAMN07520236	North America	Mexico	blood	Clinical	2013	Carbapenem	blaOXA-72	Yes
CP023024.1	A. baumannii	pAba10324b	Rep_3	r3-T5	-	7143	10324	SAMN07520237	North America	Mexico	broncial fluid	Clinical	2012	None	-	Yes
CP023025.1	A. baumannii	pAba10324c	Rep_3	r3-T3	-	113420	10324	SAMN07520237	North America	Mexico	broncial fluid	Clinical	2012	Multiple	tet(B), sul2	Yes
CP023027.1	A. baumannii	pAba10042a	Rep_3	r3-T8	-	10062	10042	SAMN07520233	North America	Mexico	secretion	Clinical	2011	Carbapenem	blaOXA-72	Yes
CP023032.1	A. baumannii	pAba7847a	Rep_3	r3-T17	-	13478	7847	SAMN07284119	North America	Mexico	blood	Clinical	2008	Carbapenem	blaOXA-58	Yes
CP023035.1	A. baumannii	pAba5845a	Rep_3	r3-T8	-	9935	5845	SAMN07520231	North America	Mexico	wound	Clinical	2009	Carbapenem	blaOXA-72	Yes
CP024125.1	A. baumannii	pAYP-A2	Rep_3	r3-T3	-	110967	AYP-A2	SAMN07445112	Pacific	Australia	wound	Clinical	2013	None	-	Yes
CP024419.1	A. baumannii	pA388	Rep_3	multi-rep	-	33036	A388	SAMN07736509	Africa	Greece	unknown	Clinical	2002	Multiple including carbapenem	aphA1, blaOXA-58	Yes
CP024577.1	A. baumannii	pAbPK1a	Rep_3	r3-T4	-	15113	AbPK1	SAMN07945345	Asia	Pakistan	sheep brocho-alveolar lavage	Animal	2012	None	-	Yes
CP026708.1	A. baumannii	tig00000534_pilon	Rep_3	r3-T1	-	8731	AR_0056	SAMN04014897	North America	USA	clinical	Clinical	nr	None	-	Yes
CP026748.1	A. baumannii	p1_005133	Rep_3	r3-T2	-	5602	WCHAB005133	SAMN08364585	Asia	China	unknown	Unknown	nr	None	-	Yes
CP026944.1	A. baumannii	pAbS1_01	Rep_3	r3-T9	-	108394	S1	SAMN07977762	North America	USA	BAL	Clinical	2007	None	-	Yes
CP026945.1	A. baumannii	pAbS1_02	Rep_3	r3-T3	-	111068	S1	SAMN07977762	North America	USA	BAL	Clinical	2007	None	-	Yes
CP027180.1	A. baumannii	p3AR_0070	Rep_3	r3-T4	-	73018	AR_0070	SAMN04014911	North America	USA	clinical	Clinical	nr	None	-	Yes
CP027184.1	A. baumannii	p3AR_0052	Rep_3	r3-T19	-	60699	AR_0052	SAMN04014893	North America	USA	clinical	Clinical	nr	Carbapenem	blaOXA-58, blaOXA-58, blaOXA-58, blaOXA-58	Yes
CP027185.1	A. baumannii	p4AR_0052	Rep_3	r3-T3	-	105128	AR_0052	SAMN04014893	North America	USA	clinical	Clinical	nr	None	-	Yes
CP027186.1	A. baumannii	p2AR_0052	Rep_3	r3-T4	-	38505	AR_0052	SAMN04014893	North America	USA	clinical	Clinical	nr	None	-	Yes
CP027244.1	A. baumannii	p2_005078	Rep_3	r3-T1	-	8731	WCHAB005078	SAMN08364584	Asia	China	unknown	Unknown	nr	None	-	Yes
CP027483.1	A. baumannii	pABI43	Rep_3	r3-T3	-	114918	I43	SAMN07689236	South America	Brazil	tissue	Clinical	2014	None	-	Yes
CP027529.1	A. baumannii	pAR_0083	Rep_3	r3-T1	-	8731	AR_0083	SAMN04014924	North America	USA	clinical	Clinical	nr	None	-	Yes
CP027608.1	A. baumannii	p2AR_0102	Rep_3	r3-T9	-	106967	AR_0102	SAMN04014943	North America	USA	clinical	Clinical	nr	None	-	Yes
CP027609.1	A. baumannii	p1AR_0102	Rep_3	r3-T1	-	8731	AR_0102	SAMN04014943	North America	USA	clinical	Clinical	nr	None	-	Yes
CP029570.1	A. baumannii	pDA33098-108	Rep_3	r3-T9	-	108151	DA33098	SAMN09241862	Europe	Spain	clinical	Clinical	nr	None	-	Yes
CP029572.1	A. baumannii	pDA33098-9-2	Rep_3	r3-T8	-	8771	DA33098	SAMN09241862	Europe	Spain	clinical	Clinical	nr	Carbapenem	blaOXA-24	Yes
CP029573.1	A. baumannii	pDA33098-9	Rep_3	r3-T2	-	8963	HWBA8	SAMN06650239	Asia	South Korea	sputum	Clinical	2013	Carbapenem	blaOXA-24	Yes
CP031381.2	A. baumannii	pACICU1b	Rep_3	multi-rep	-	24268	ACICU	SAMN09302593	Europe	Italy	cerebrospinal fluid	Clinical	2005	Carbapenem	blaOXA-58	Yes
CP031445.1	A. baumannii	pMDR-UNC	Rep_3	r3-T9	-	112216	MDR-UNC	SAMN09769497	North America	USA	wound	Clinical	2012	Macrolide	mph(E), msr(E)	Yes
CP031446.1	A. baumannii	pAB120	Rep_3	r3-T1	-	10879	MDR-UNC	SAMN09769497	North America	USA	wound	Clinical	2012	Carbapenem	blaOXA-72, blaOXA72	Yes
CP033244.1	A. baumannii	pAba7835a	Rep_3	r3-T17	-	8536	7835	SAMN07520235	North America	Mexico	tissue	Clinical	2007	None	-	Yes
CP033752.1	A. baumannii	p2FDAARGOS_540	Rep_3	r3-T6	-	13195	FDAARGOS_540	SAMN10163233	North America	USA	clinical isolate	Clinical	nr	None	-	Yes
CP033870.1	A. baumannii	p597A-6.7,	Rep_3	r3-T1	-	6667	MRSN15313	SAMN10411605	South America	Brazil	cerebrospinal fluid	Clinical	2008	None	-	Yes
CP033872.1	A. baumannii	pAb-MCR4.1	Rep_3	r3-T22	-	35502	MRSN15313	SAMN10411605	South America	Brazil	cerebrospinal fluid	Clinical	2008	Other	mcr-4	Yes
CP035044.1	A. baumannii	p13.0Kbp	Rep_3	r3-T2	-	12952	ABUH796	SAMN05238571	North America	USA	sputum	Clinical	2010	Aminoglycoside	aphA6	Yes
CP035046.1	A. baumannii	p107.0Kbp	Rep_3	r3-T9	-	106963	ABUH793	SAMN05238672	North America	USA	sputum	Clinical	2015	None	-	Yes
CP035048.1	A. baumannii	p10.9Kbp	Rep_3	r3-T2	-	10945	ABUH793	SAMN05238672	North America	USA	sputum	Clinical	2015	None	-	Yes
CP035053.1	A. baumannii	p11.0Kbp	Rep_3	r3-T2	-	10967	YU-R612	SAMN05238628	North America	USA	unknown	Clinical	2015	None	-	Yes
CP035673.1	A. baumannii	pVB23193	Rep_3	r3-T4	-	16033	VB23193	SAMN07977426	Asia	India	blood	Clinical	2015	None	-	Yes
CP035933.1	A. baumannii	p1VB31459	Rep_3	r3-T4	-	11195	VB31459	SAMN10170272	Asia	India	blood	Clinical	2017	None	-	Yes
CP036284.1	A. baumannii	p60155_1	Rep_3	r3-T3	-	127784	TG60155	SAMN10261590	North America	USA	sputum	Clinical	2013	Carbapenem	blaOXA-23	Yes
CP038261.1	A. baumannii	pEH_mcr4.3	Rep_3	r3-T22	-	18786	39741	SAMN10386508	Europe	Czech Republic	Tracheal aspirate	Clinical	2018	Other	mcr-4	Yes
CP038265.1	A. baumannii	pEC_mcr4.3	Rep_3	r3-T22	-	43093	LEV1449/17Ec	SAMN10386510	Europe	Czech Republic	frozen liver	Clinical	2018	Other	mcr-4	Yes
CP038645.1	A. baumannii	p8ACN21	Rep_3	r3-T3	-	116047	ACN21	SAMN11311113	Asia	India	blood	Clinical	2018	None	-	Yes
CP038648.1	A. baumannii	p5ACN21	Rep_3	r3-T6	-	9205	ACN21	SAMN11311113	Asia	India	blood	Clinical	2018	None	-	Yes
CP039342.1	A. baumannii	pTG31986	Rep_3	r3-T16	-	55269	TG31986	SAMN10261613	North America	USA	Tracheal aspirate	Clinical	2012	None	-	Yes
CP039344.1	A. baumannii	pTG31302	Rep_3	r3-T16	-	55268	TG31302	SAMN10261535	North America	USA	Tracheal aspirate	Clinical	2012	None	-	Yes
CP039519.1	A. baumannii	pTG22653	Rep_3	r3-T3	-	127784	TG22653	SAMN10261589	North America	USA	BAL	Clinical	2011	Carbapenem	blaOXA-23	Yes
CP039521.1	A. baumannii	pTG22627	Rep_3	r3-T2	-	5602	TG22627	SAMN10261584	North America	USA	Tracheal aspirate	Clinical	2011	None	-	Yes
CP039932.1	A. baumannii	pTG29392_2	Rep_3	r3-T16	-	55269	TG29392	SAMN10261537	North America	USA	blood	Clinical	2012	None	-	Yes
CP039995.1	A. baumannii	pTG22182_2	Rep_3	r3-T2	-	5602	TG22182	SAMN10261544	North America	USA	Tracheal aspirate	Clinical	2011	None	-	Yes
CP040045.1	A. baumannii	p1VB958	Rep_3	r3-T11	-	16485	VB958	SAMN11554497	Asia	India	blood	Clinical	2019	None	-	Yes
CP040049.1	A. baumannii	pVB1190	Rep_3	r3-T11	-	16479	VB1190	SAMN11554995	Asia	India	blood	Clinical	2019	None	-	Yes
CP040055.1	A. baumannii	p1VB35179	Rep_3	r3-T11	-	16467	VB35179	SAMN11557490	Asia	India	blood	Clinical	2018	None	-	Yes
CP040083.1	A. baumannii	pSP304	Rep_3	r3-T5	-	9185	SP304	SAMN11571814	Asia	India	sputum	Clinical	2019	None	-	Yes
CP040086.1	A. baumannii	p1VB33071	Rep_3	r3-T4	-	11194	VB33071	SAMN11571816	Asia	India	blood	Clinical	2018	None	-	Yes
CP040088.1	A. baumannii	pVB35575	Rep_3	r3-T4	-	11194	VB35575	SAMN11571817	Asia	India	blood	Clinical	2018	None	-	Yes
CP040261.1	A. baumannii	p2P7774	Rep_3	r3-T1	-	14880	P7774	SAMN11621520	Asia	India	Pus	Clinical	2018	None	-	Yes
CP040426.1	A. baumannii	pPB364_1	Rep_3	r3-T9	-	111449	PB364	SAMN11660471	North America	USA	clinical	Clinical	2016	Macrolide	mph(E), msr(E)	Yes
CP040427.1	A. baumannii	pPB364_2	Rep_3	r3-T2	-	10967	PB364	SAMN11660471	North America	USA	clinical	Clinical	2016	None	-	Yes
CP041589.1	A. baumannii	pJ9-2	Rep_3	r3-T2	-	10967	J9	SAMN12158047	Pacific	Australia	clinical	Clinical	1999	None	-	Yes
CP042208.1	A. baumannii	pTS11291	Rep_3	r3-T2	-	11291	DS002	SAMN08637743	Asia	India	soil	Environment	2005	None	-	Yes
CP042210.1	A. baumannii	pTS134338	Rep_3	r3-T7	-	134338	DS002	SAMN08637743	Asia	India	soil	Environmental	2005	None	-	Yes
CP042558.1	A. baumannii	pE47_002	Rep_3	r3-T7	-	59744	E47	SAMN12289292	Pacific	Australia	Hospital surfaces	Clinical	2013	None	-	Yes
CP042560.1	A. baumannii	pE47_004	Rep_3	r3-T2	-	7703	E47	SAMN12289292	Pacific	Australia	Hospital surfaces	Clinical	2013	None	-	Yes
CP043954.1	A. baumannii	pK09-14	Rep_3	r3-T24	-	7791	K09-14	SAMN12769618	Asia	Malaysia	soil	Environment	2017	Carbapenem	blaOXA-72	Yes
CP044358.1	A. baumannii	pCAM180B	Rep_3	r3-T2	-	16096	CAM180-1	SAMN12825295	Asia	Cambodia	oral cavity	Clinical	2016	None	-	Yes
CP044518.1	A. baumannii	p31FS3-2-1	Rep_3	r3-T26	-	6099	31FS3-2	SAMN12860376	Asia	China	feces	Clinical	2017	Tetracycline	tet39	Yes
CP044521.1	A. baumannii	p29FS20-2	Rep_3	r3-T13	-	12731	29FS20	SAMN12859885	Asia	China	feces	Clinical	2017	Multiple	tet39, strB, strA, sul2	Yes
CP045109.1	A. baumannii	p2ATCC19606	Rep_3	r3-T4	-	9540	ATCC 19606	SAMN12389466	North America	USA	urine	Clinical	1948	None	-	Yes
CP046901.1	A. baumannii	pA1429a	Rep_3	r3-T18	-	7852	A1429	SAMN13565236	Asia	China	secretion	Clinical	2010	Carbapenem	blaOXA-24	Yes
CP047974.1	A. baumannii	pDETAB1	Rep_3	r3-T3	-	103751	DETAB-P2	SAMN13884837	Asia	China	rectal swab	Clinical	2019	None	-	Yes
CP047976.1	A. baumannii	pDETAB3	Rep_3	r3-T2	-	9132	DETAB-P2	SAMN13884837	Asia	China	rectal swab	Clinical	2019	None	-	Yes
CP048133.1	A. baumannii	pD46-2	Rep_3	r3-T1	-	8731	D46	SAMN13874778	Pacific	Australia	UTI	Clinical	2010	None	-	Yes
CP048850.1	A. baumannii	pD4-1	Rep_3	r3-T15	-	2277	D4	SAMN13874777	Pacific	Australia	wound	Clinical	2006	None	-	Yes
CP049315.1	A. baumannii	pEx003	Rep_3	r3-T43	-	11844	Ex003	SAMN14149265	Middle East	Lebanon	Water	Environment	2012	None	-	Yes
CP050387.1	A. baumannii	pVB82_2	Rep_3	r3-T1	-	7540	VB82	SAMN14409516	Asia	India	blood	Clinical	2019	None	-	Yes
CP050389.1	A. baumannii	pVB473_1	Rep_3	r3-T11	-	16470	VB473	SAMN14409628	Asia	India	sputum	Clinical	2019	None	-	Yes
CP050391.1	A. baumannii	pVB723_1	Rep_3	r3-T1	-	8731	VB723	SAMN14409813	Asia	India	blood	Clinical	2019	None	-	Yes
CP050393.1	A. baumannii	pVB11737_2	Rep_3	r3-T1	-	8731	VB11737	SAMN14410107	Asia	India	blood	Clinical	2019	None	-	Yes
CP050402.1	A. baumannii	pVB2181	Rep_3	r3-T1	-	8731	VB2181	SAMN14410138	Asia	India	sputum	Clinical	2019	None	-	Yes
CP050405.1	A. baumannii	pVB2486_2	Rep_3	r3-T11	-	14906	VB2486	SAMN14414761	Asia	India	sputum	Clinical	2019	None	-	Yes
CP050411.1	A. baumannii	pPM192235_1	Rep_3	r3-T1	-	8731	PM1912235	SAMN14420246	Asia	India	Pus	Clinical	2019	None	-	Yes
CP050414.1	A. baumannii	pPM192696_2	Rep_3	r3-T1	-	8732	PM192696	SAMN14420253	Asia	India	sputum	Clinical	2019	None	-	Yes
CP050418.1	A. baumannii	pPM193665_3	Rep_3	r3-T11	-	18783	PM193665	SAMN14420254	Asia	India	Pus	Clinical	2019	None	-	Yes
CP050419.1	A. baumannii	pPM193665_4	Rep_3	r3-T1	-	7540	PM193665	SAMN14420254	Asia	India	Pus	Clinical	2019	None	-	Yes
CP050422.1	A. baumannii	pVB2200_1	Rep_3	r3-T1	-	8731	VB2200	SAMN14415334	Asia	India	sputum	Clinical	2019	None	-	Yes
CP050427.1	A. baumannii	pPM194122_2	Rep_3	r3-T11	-	18783	PM194188	SAMN14420255	Asia	India	Bronchoalveolar lavage fluid	Clinical	2019	None	-	Yes
CP050428.1	A. baumannii	pPM194122_3	Rep_3	r3-T17	-	7695	PM194188	SAMN14420255	Asia	India	Bronchoalveolar lavage fluid	Clinical	2019	None	-	Yes
CP050429.1	A. baumannii	pPM194122_4	Rep_3	r3-T1	-	7549	PM194188	SAMN14420255	Asia	India	Bronchoalveolar lavage fluid	Clinical	2019	None	-	Yes
CP050430.1	A. baumannii	pPM194122_5	Rep_3	r3-T30	-	2762	PM194188	SAMN14420255	Asia	India	Bronchoalveolar lavage fluid	Clinical	2019	None	-	Yes
CP050434.1	A. baumannii	pPM194229_2	Rep_3	r3-T2	-	10697	PM194229	SAMN14422682	Asia	India	Bronchoalveolar lavage fluid	Clinical	2019	None	-	Yes
CP050435.1	A. baumannii	pPM194229_3	Rep_3	r3-T5	-	9847	PM194229	SAMN14422682	Asia	India	Bronchoalveolar lavage fluid	Clinical	2019	None	-	Yes
CP050524.1	A. baumannii	pVB7036_1	Rep_3	r3-T1	-	8730	VB7036	SAMN14410111	Asia	India	blood	Clinical	2019	None	-	Yes
CP050527.1	A. baumannii	pVB2139_1	Rep_3	r3-T1	-	8731	VB2139	SAMN14414747	Asia	India	sputum	Clinical	2019	None	-	Yes
CP050905.1	A. baumannii	p2DT-Ab057	Rep_3	r3-T3	-	110967	DT-Ab057	SAMN14308892	Asia	China	Bronchoalveolar lavage fluid	Clinical	2019	None	-	Yes
CP050906.1	A. baumannii	p1DT-Ab057	Rep_3	r3-T1	-	8731	DT-Ab057	SAMN14308892	Asia	China	Bronchoalveolar lavage fluid	Clinical	2019	None	-	Yes
CP050908.1	A. baumannii	p3DT-Ab022	Rep_3	r3-T3	-	119067	DT-Ab022	SAMN14308866	Asia	China	sputum	Clinical	2017	None	-	Yes
CP050910.1	A. baumannii	p1DT-Ab0	Rep_3	r3-T1	-	8731	DT-Ab022	SAMN14308866	Asia	China	sputum	Clinical	2017	None	-	Yes
CP050913.1	A. baumannii	p1DT-Ab020	Rep_3	r3-T1	-	8731	DT-Ab020	SAMN14308864	Asia	China	sputum	Clinical	2018	None	-	Yes
CP050918.1	A. baumannii	p1DT-Ab003	Rep_3	r3-T1	-	8731	DT-Ab003	SAMN14308849	Asia	China	stethoscope	Clinical	2017	None	-	Yes
CP051475.1	A. baumannii	pVB2107_1	Rep_3	r3-T1	-	8731	VB2107	SAMN14414778	Asia	India	sputum	Clinical	2019	None	-	Yes
CP051865.1	A. baumannii	pAb-C102_3	Rep_3	r3-T13	-	19853	Ab-C102	SAMN14667518	Africa	Ghana	blood	Clinical	2016	None	-	Yes
CP051868.1	A. baumannii	pAb-C63_2	Rep_3	r3-T6	-	10663	Ab-C63	SAMN14667517	Africa	Ghana	sputum	Clinical	2016	None	-	Yes
CP051876.1	A. baumannii	pAb-B004d-c_1	Rep_3	r3-T20	-	48239	Ab-B004d-c	SAMN14667515	Africa	Ghana	sputum	Clinical	2016	Multiple	dfrA1, mph(E), msr(E), tet39, aacC2d	Yes
CP051877.1	A. baumannii	pAb-B004d-c_2	Rep_3	r3-T10	-	8495	Ab-B004d-c	SAMN14667515	Africa	Ghana	sputum	Clinical	2016	None	-	Yes
CP053219.1	A. baumannii	p3DT01139C	Rep_3	r3-T21	-	97161	DT01139C	SAMN14833556	Africa	Tanzania	clinical	Clinical	2017	None	-	Yes
CP054417.1	A. baumannii	pAB79*	Rep_3	r3-T4	-	11194	AB79	SAMN15097904	Asia	China	Eye secretion	Clinical	2018	None	-	Yes
CP054561.1	A. baumannii	pYC103-1	Rep_3	r3-T13	-	10832	YC103	SAMN15182649	Asia	China	feces	Clinical	2019	Tetracycline	tet39	Yes
CP056785.1	A. baumannii	pTP1A	Rep_3	r3-T1	-	8731	TP1	SAMN15344688	North America	USA	human clinical sample	Clinical	2016	None	-	Yes
CP058626.1	A. baumannii	pATCCBAA1605	Rep_3	r3-T1	-	8731	ATCC BAA1605	SAMN15437745	North America	Canada	sputum	Clinical	2006	None	-	Yes
CP058730.1	A. baumannii	pM164-3.1	Rep_3	r3-T3	-	110272	M164-3	SAMN15438232	Asia	China	unknown	Unknown	2018	Multiple	tet(B), sul2	Yes
CP058731.1	A. baumannii	pM164-3.2	Rep_3	r3-T13	-	8731	M164-3	SAMN15438232	Asia	China	unknown	Unknown	2018	None	-	Yes
CP059304.1	A. baumannii	pAC1633-3	Rep_3	r3-T34	-	9950	AC1633	SAMN15574350	Asia	Malaysia	blood	Clinical	2016	None	-	Yes
CP059387.1	A. baumannii	p1.36-1512	Rep_3	r3-T3	-	113330	36-1512	SAMN15541804	Europe	Russia	respiratory tract	Clinical	2013	Sulphonamide	sul2	Yes
CP059389.1	A. baumannii	p3.36-1512	Rep_3	r3-T2	-	5688	36-1512	SAMN15541804	Europe	Russia	respiratory tract	Clinical	2015	None	-	Yes
CP059543.1	A. baumannii	p3E-011922	Rep_3	r3-T3	-	117806	E-011922	SAMN15646564	Europe	Finland	paper mill kaolin	Environment	2009	None	-	Yes
CP059545.1	A. baumannii	p1E-011922	Rep_3	r3-T14	-	7369	E-011922	SAMN15646564	Europe	Finland	paper mill kaolin	Environment	2009	None	-	Yes
CP059730.1	A. baumannii	pAbCTX13_7kb	Rep_3	r3-T10	-	7055	AbCTX13	SAMN15501316	Europe	France	Peritoneal fluid	Clinical	2017	Carbapenem	blaOXA-72	Yes
CP060012.1	A. baumannii	pTP2A	Rep_3	r3-T1	-	8731	TP2	SAMN15735522	North America	USA	human clinical sample	Clinical	2016	None	-	Yes
CP060014.1	A. baumannii	pTP3A	Rep_3	r3-T1	-	8731	TP3	SAMN15738014	North America	USA	human clinical sample	Clinical	2016	None	-	Yes
CP060996.1	A. baumannii	pCAb-65-1*	Rep_3	r3-T6	-	13325	CAb-65	SAMN15929419	Asia	Malaysia	unknown	Unknown	2018	None	-	Yes
CP061515.1	A. baumannii	pCFSAN093710_1	Rep_3	r3-T3	-	110967	CFSAN093710	SAMN12391854	North America	USA	sterile body site	Clinical	2005	None	-	Yes
CP061518.1	A. baumannii	pCFSAN093709	Rep_3	r3-T3	-	110965	CFSAN093709	SAMN12413929	North America	USA	urine	Clinical	2007	None	-	Yes
CP061520.1	A. baumannii	pCFSAN093708	Rep_3	r3-T3	-	110967	CFSAN093708	SAMN12391536	North America	USA	wound	Clinical	2004	None	-	Yes
CP061522.1	A. baumannii	pCFSAN093707	Rep_3	r3-T3	-	110964	CFSAN093707	SAMN12391534	North America	USA	sterile body site	Clinical	2004	None	-	Yes
CP061524.1	A. baumannii	pCFSAN093706	Rep_3	r3-T3	-	110967	CFSAN093706	SAMN12391535	North America	USA	blood	Clinical	2005	None	-	Yes
CP061526.1	A. baumannii	pCFSAN093705	Rep_3	r3-T1	-	14639	CFSAN093705	SAMN12391537	North America	USA	urine	Clinical	2009	None	-	Yes
CP061710.1	A. baumannii	p4E072658	Rep_3	r3-T2	-	7989	E-072658	SAMN15646565	Europe	Finland	paper pulp mill	Environment	2009	None	-	Yes
CP065052.1	A. baumannii	p5637	Rep_3	r3-T7	-	72156	2016GDAB1	SAMN16714580	Asia	China	brocho-alveolar lavage	Clinical	2016	Multiple	dfrA18, arr-3, sul1, strA, strA, strB, mph(E), msr(E), tet39, floR, tet(Y)	Yes
CP065433.1	A. baumannii	pAB17961-1	Rep_3	r3-T4	-	9395	ATCC 17961	SAMN08687991	North America	USA	blood	Clinical	2016	None	-	Yes
CP065886.1	A. baumannii	p2FDAARGOS_917	Rep_3	r3-T4	-	9540	FDAARGOS_917	SAMN13450447	North America	USA	clinical	Clinical	nr	None	-	Yes
CP065888.1	A. baumannii	p1FDAARGOS_917	Rep_3	r3-T12	-	6778	FDAARGOS_917	SAMN13450447	North America	USA	clinical	Clinical	nr	None	-	Yes
CP066017.1	A. baumannii	pFDAARGOS_1036	Rep_3	r3-T1	-	10308	FDAARGOS_1036	SAMN16357205	North America	USA	clinical	Clinical	nr	None	-	Yes
CP066231.1	A. baumannii	pG20AB011-2,	Rep_3	r3-T1	-	8731	G20AB011	SAMN17073618	Asia	South Korea	blood	Clinical	2020	None	-	Yes
CP066240.1	A. baumannii	pG20AB007-3	Rep_3	r3-T1	-	8731	G20AB007	SAMN17073615	Asia	South Korea	blood	Clinical	2020	None	-	Yes
CP067103.1	A. baumannii	pNC2	Rep_3	r3-T2	-	10955	ATCC BAA-1790	SAMN12399660	North America	USA	sputum	Clinical	2008	None	-	Yes
CP069842.1	A. baumannii	p1FDAARGOS_1360	Rep_3	r3-T1	-	14879	FDAARGOS_1360	SAMN16357502	North America	USA	unknown	Unknown	nr	None	-	Yes
CP069852.1	A. baumannii	pFDAARGOS_1359	Rep_3	r3-T1	-	8731	FDAARGOS_1359	SAMN16357501	North America	USA	unknown	Unknown	nr	None	-	Yes
CP071764.1	A. baumannii	p1cl415	Rep_3	r3-T15	-	2277	Cl415	SAMN18202092	Middle East	Lebanon	blood	Clinical	2017	None	-	Yes
CP071765.1	A. baumannii	p2Cl415	Rep_3	r3-T1	-	8731	Cl415	SAMN18202092	Middle East	Lebanon	blood	Clinical	2017	None	-	Yes
CP071920.1	A. baumannii	pABT-897-17	Rep_3	r3-T1	-	13480	GIMC5510	SAMN18276099	Europe	Russia	blood	Clinical	2017	Carbapenem	blaOXA-72, blaOXA72	Yes
CP072125.1	A. baumannii	p3KSK1	Rep_3	r3-T1	-	7540	KSK1	SAMN18396008	Asia	India	respiratory specimen	Clinical	2020	None	-	Yes
CP072273.1	A. baumannii	p3KSK6	Rep_3	r3-T1	-	7540	KSK6	SAMN18452234	Asia	India	respiratory specimen	Clinical	2020	None	-	Yes
CP072278.1	A. baumannii	p3KSK7	Rep_3	r3-T1	-	7540	KSK7	SAMN18452334	Asia	India	respiratory specimen	Clinical	2020	None	-	Yes
CP072283.1	A. baumannii	p3KSK10	Rep_3	r3-T1	-	7540	KSK10	SAMN18452342	Asia	India	respiratory specimen	Clinical	2020	None	-	Yes
CP072288.1	A. baumannii	p3KSK11	Rep_3	r3-T1	-	7540	KSK11	SAMN18452659	Asia	India	respiratory specimen	Clinical	2020	None	-	Yes
CP072293.1	A. baumannii	p3KSK18	Rep_3	r3-T1	-	7540	KSK18	SAMN18452698	Asia	India	respiratory specimen	Clinical	2020	None	-	Yes
CP072298.1	A. baumannii	p3KSK19	Rep_3	r3-T1	-	7540	KSK19	SAMN18452699	Asia	India	respiratory specimen	Clinical	2020	None	-	Yes
CP072303.1	A. baumannii	p3KSK20	Rep_3	r3-T1	-	7540	KSK20	SAMN18452712	Asia	India	respiratory specimen	Clinical	2020	None	-	Yes
CP072306.1	A. baumannii	p1KSKSensitive	Rep_3	r3-T16	-	55356	KSK Sensitive	SAMN18452713	Asia	India	respiratory specimen	Clinical	2020	None	-	Yes
CP072401.1	A. baumannii	p3KSK2	Rep_3	r3-T1	-	7540	KSK2	SAMN18451305	Asia	India	respiratory specimen	Clinical	2020	None	-	Yes
CP072528.1	A. baumannii	pDETAB5	Rep_3	r3-T7	-	97035	DETAB-E227	SAMN18498586	Asia	China	Hospital environment	Clinical	2019	Multiple including carbapenem	aacC2d, blaOXA-58, sul2, msr(E), mph(E), blaNDM-1, aphA6	Yes
CP072529.1	A. baumannii	pDETAB6	Rep_3	r3-T5	-	7145	DETAB-E227	SAMN18498586	Asia	China	Hospital environment	Clinical	2019	None	-	Yes
CP073061.1	A. baumannii	pDETAB13	Rep_3	r3-T7	-	91083	DETAB-P39	SAMN18498587	Asia	China	unknown	Unknown	2019	None	-	Yes
CP075322.1	A. baumannii	pDD520	Rep_3	r3-T3	-	110967	DD520	SAMN19073634	Asia	China	pneumonia	Clinical	2021	None	-	Yes
CP076803.1	A. baumannii	p2UC25604	Rep_3	r3-T13	-	11203	UC25604	SAMN19356555	South America	Chile	peritoneal abscess	Clinical	2012	None	-	Yes
CP076806.1	A. baumannii	p2UC24371	Rep_3	r3-T13	-	11204	UC24371	SAMN19356554	South America	Chile	endotracheal aspirate	Clinical	2011	None	-	Yes
CP076808.1	A. baumannii	p1UC20804	Rep_3	r3-T28	-	65432	UC20804	SAMN19356540	South America	Chile	peritoneal abscess	Clinical	2010	Multiple	sul2, aacC2, aphA6, strA, strB	Yes
CP076809.1	A. baumannii	p2UC20804	Rep_3	r3-T14	-	17469	UC20804	SAMN19356540	South America	Chile	peritoneal abscess	Clinical	2010	Carbapenem	blaOXA-58	Yes
CP076810.1	A. baumannii	p3UC20804	Rep_3	r3-T18	-	8229	UC20804	SAMN19356540	South America	Chile	peritoneal abscess	Clinical	2010	None	-	Yes
CP076811.1	A. baumannii	p4UC20804	Rep_3	r3-T5	-	6829	UC20804	SAMN19356540	South America	Chile	peritoneal abscess	Clinical	2010	None	-	Yes
CP076813.1	A. baumannii	p1UC23022	Rep_3	r3-T14	-	9197	UC23022	SAMN19356535	South America	Chile	blood	Clinical	2011	None	-	Yes
CP076816.1	A. baumannii	p2UC21460	Rep_3	r3-T14	-	17469	UC21460	SAMN19356533	South America	Chile	tissue	Clinical	2010	Carbapenem	blaOXA-58	Yes
CP076819.1	A. baumannii	p2UC24137	Rep_3	r3-T14	-	13776	UC24137	SAMN19356530	South America	Chile	sacrum ulcer	Clinical	2011	Multiple	blaTEM, aacC2e	Yes
CP076820.1	A. baumannii	p3UC24137	Rep_3	r3-T13	-	9543	UC24137	SAMN19356530	South America	Chile	sacrum ulcer	Clinical	2011	None	-	Yes
CP076822.1	A. baumannii	p1UC22850	Rep_3	r3-T14	-	11714	UC22850	SAMN19356522	South America	Chile	catheter	Clinical	2011	Multiple	blaTEM, aacC2e	Yes
CP077827.1	A. baumannii	pDETAB12	Rep_3	r3-T3	-	110967	DETAB-E108	SAMN19762585	Asia	China	Bedside table	Clinical	2019	None	-	Yes
CP077829.1	A. baumannii	pDETAB11	Rep_3	r3-T2	-	5602	DETAB-E351	SAMN19762827	Asia	China	Ventilator shelf	Clinical	2019	None	-	Yes
CP077831.1	A. baumannii	pDETAB9b	Rep_3	r3-T4	-	11193	DETAB-E51	SAMN19762528	Asia	China	bed	Clinical	2019	None	-	Yes
CP077834.1	A. baumannii	pDETAB10	Rep_3	r3-T1	-	8731	DETAB-P43	SAMN19774606	Asia	China	Nasojejunal tube	Clinical	2019	None	-	Yes
CP077839.1	A. baumannii	pDETAB10	Rep_3	r3-T1	-	8731	DETAB-E159	SAMN19762636	Asia	China	Locker	Clinical	2019	None	-	Yes
CP077842.1	A. baumannii	pDETAB9a	Rep_3	r3-T4	-	11194	DETAB-P90	SAMN19774653	Asia	China	Rectal swab	Clinical	2019	None	-	Yes
CP077845.1	A. baumannii	pDETAB9a	Rep_3	r3-T4	-	11194	DETAB-E155	SAMN19762632	Asia	China	Infusion stand	Clinical	2019	None	-	Yes
CP077848.1	A. baumannii	pDETAB10	Rep_3	r3-T1	-	8731	DETAB-P24	SAMN19774588	Asia	China	Nasojejunal tube	Clinical	2019	None	-	Yes
CP078100.1	A. baumannii	pCNRAB1*	Rep_3	r3-T3	-	112293	CNRAB1	SAMN19988021	Europe	France	UTI	Clinical	2012	None	-	Yes
CP080456.1	A. baumannii	pMRSN56-4	Rep_3	r3-T1	-	8731	MRSN 56	SAMN19955388	North America	USA	Hip	Clinical	2010	None	-	Yes
CP082888.1	A. baumannii	p2014LNAB1-1	Rep_3	r3-T3	-	110998	2014LNAB1	SAMN15538702	Asia	China	sputum	Clinical	2016	None	-	Yes
CP082890.1	A. baumannii	p2014LNAB1-3	Rep_3	r3-T4	-	11194	2014LNAB1	SAMN15538702	Asia	China	sputum	Clinical	2016	Carbapenem	blaOXA-23	Yes
CP082891.1	A. baumannii	p2016LNAB1-1	Rep_3	r3-T3	-	110967	2016LNAB1	SAMN15538701	Asia	China	cerebrospinal fluid	Clinical	2016	None	-	Yes
CP082893.1	A. baumannii	p2016LNAB1-3	Rep_3	r3-T4	-	11205	2016LNAB1	SAMN15538701	Asia	China	cerebrospinal fluid	Clinical	2016	None	-	Yes
CP082894.1	A. baumannii	p2018HBAB1-1	Rep_3	r3-T3	-	110968	2018HBAB1	SAMN15538698	Asia	China	abdominal fluid	Clinical	2018	None	-	Yes
CP082953.1	A. baumannii	pCl300	Rep_3	r3-T6	-	9205	Cl300	SAMN21240079	Middle East	Lebanon	lung infection	Clinical	2015	None	-	Yes
CP083182.1	A. baumannii	unnamed	Rep_3	r3-T7	-	104309	AB43	SAMN21028540	Asia	China	sputum	Clinical	2017	None	-	Yes
CP084298.1	A. baumannii	pLHC22-2-tetX-162k	Rep_3	r3-T21	-	162264	LHC22-2	SAMN20477964	Asia	China	Chcken feces	Animal	2020	None	-	Yes
CP084722.1	A. baumannii	pHKU7a	Rep_3	r3-T1	-	8731	HKU7	SAMN22202746	Asia	Hong Kong	Hospital environment	Clinical	2020	None	-	Yes
CP084725.1	A. baumannii	pHKU6a	Rep_3	r3-T1	-	8731	HKU6	SAMN22202745	Asia	Hong Kong	Hospital environment	Clinical	2020	None	-	Yes
CP084728.1	A. baumannii	pHKU5a	Rep_3	r3-T1	-	8731	HKU5	SAMN22202744	Asia	Hong Kong	Hospital environment	Clinical	2020	None	-	Yes
CP084731.1	A. baumannii	pHKU4a	Rep_3	r3-T1	-	8731	HKU4	SAMN22202743	Asia	Hong Kong	Hospital environment	Clinical	2020	None	-	Yes
CP084734.1	A. baumannii	pHKU3a	Rep_3	r3-T1	-	8731	HKU3	SAMN22202742	Asia	Hong Kong	Hospital environment	Clinical	2020	None	-	Yes
CP085789.1	A. baumannii	pRCH52-1	Rep_3	r3-T43	-	11164	RCH52	SAMN14226727	Pacific	Australia	unknown	Clinical	nr	Tetracycline	tet39	Yes
CP085790.1	A. baumannii	pRCH52-2	Rep_3	r3-T13	-	7039	RCH52	SAMN14226727	Pacific	Australia	unknown	Clinical	nr	None	-	Yes
CP087595.1	A. baumannii	pAb01-1	Rep_3	r3-T33	-	8571	SHOU-Ab01	SAMN23235066	Asia	China	unknown	Clinical	2021	None	-	Yes
CP091329.1	A. baumannii	p1	Rep_3	r3-T4	-	22388	BM2333	SAMN25185246	Asia	China	unknown	Clinical	2018	None	-	Yes
CP091466.1	A. baumannii	pNCCP16007*	Rep_3	r3-T1	-	8808	NCCP 16007	SAMN25236223	Asia	South Korea	urine	Clinical	2011	None	-	Yes
CP092486.1	A. baumannii	pAB2877	Rep_3	r3-T1	-	8731	AB2877	SAMN26082895	Asia	China	sputum	Clinical	2021	None	-	Yes
CP094284.1	A. baumannii	pNY5301-1	Rep_3	r3-T3	-	110967	NY5301	SAMN26814682	Asia	China	abdominal fluid	Clinical	2018	None	-	Yes
CP094286.1	A. baumannii	pNY5301-3	Rep_3	r3-T1	-	8731	NY5301	SAMN26814682	Asia	China	abdominal fluid	Clinical	2018	None	-	Yes
CP096683.1	A. baumannii	p5955	Rep_3	r3-T4	-	22367	5955	SAMN24114687	Asia	China	tracheal aspirate	Clinical	2018	None	-	Yes
CP096685.1	A. baumannii	p5847	Rep_3	r3-T3	-	110973	5847	SAMN24114686	Asia	China	sputum	Clinical	2016	None	-	Yes
CP096687.1	A. baumannii	p5846	Rep_3	r3-T3	-	110968	5846	SAMN24114685	Asia	China	blood	Clinical	2018	None	-	Yes
CP096694.1	A. baumannii	p5773_1	Rep_3	r3-T4	-	22354	5773	SAMN24114679	Asia	China	secretion	Clinical	2012	None	-	Yes
CP096697.1	A. baumannii	p5771	Rep_3	r3-T3	-	112156	5771	SAMN24114678	Asia	China	brocho-alveolar lavage	Clinical	2012	None	-	Yes
CP096699.1	A. baumannii	p5769	Rep_3	r3-T3	-	110970	5769	SAMN24114677	Asia	China	brocho-alveolar lavage	Clinical	2012	None	-	Yes
CP096701.1	A. baumannii	p5768	Rep_3	r3-T3	-	110966	5768	SAMN24114676	Asia	China	blood	Clinical	2012	None	-	Yes
CP096709.1	A. baumannii	p5760_2	Rep_3	r3-T3	-	110967	5760	SAMN24114672	Asia	China	sputum	Clinical	2012	None	-	Yes
CP096711.1	A. baumannii	p5759_1	Rep_3	r3-T3	-	110967	5759	SAMN24114671	Asia	China	brocho-alveolar lavage	Clinical	2012	None	-	Yes
CP096713.1	A. baumannii	p5759_3	Rep_3	r3-T4	-	33550	5759	SAMN24114671	Asia	China	brocho-alveolar lavage	Clinical	2012	None	-	Yes
CP096715.1	A. baumannii	p5745_1	Rep_3	r3-T4	-	44752	5745	SAMN24114670	Asia	China	abdominal fluid	Clinical	2011	None	-	Yes
CP096721.1	A. baumannii	p5740	Rep_3	r3-T3	-	112155	5740	SAMN24114668	Asia	China	sputum	Clinical	2010	None	-	Yes
CP096723.1	A. baumannii	p5736	Rep_3	r3-T3	-	112157	5736	SAMN24114667	Asia	China	sputum	Clinical	2010	None	-	Yes
CP096726.1	A. baumannii	p5734_2	Rep_3	r3-T3	-	110965	5734	SAMN24114666	Asia	China	blood	Clinical	2010	None	-	Yes
CP096728.1	A. baumannii	p5732	Rep_3	r3-T3	-	110968	5732	SAMN24114665	Asia	China	sputum	Clinical	2010	None	-	Yes
CP096732.1	A. baumannii	p5689_1	Rep_3	r3-T3	-	110967	5689	SAMN24114663	Asia	China	blood	Clinical	2016	None	-	Yes
CP096737.1	A. baumannii	p5683_2	Rep_3	r3-T3	-	110968	5683	SAMN24114661	Asia	China	blood	Clinical	2016	None	-	Yes
CP096741.1	A. baumannii	p5672	Rep_3	r3-T4	-	11196	5672	SAMN24114658	Asia	China	blood	Clinical	2013	None	-	Yes
CP096743.1	A. baumannii	p5671_1	Rep_3	r3-T3	-	110967	5671	SAMN24114657	Asia	China	blood	Clinical	2013	None	-	Yes
CP096746.1	A. baumannii	p5670	Rep_3	r3-T3	-	112156	5670	SAMN24114656	Asia	China	blood	Clinical	2013	None	-	Yes
CP096748.1	A. baumannii	p5669	Rep_3	r3-T3	-	112152	5669	SAMN24114655	Asia	China	blood	Clinical	2013	None	-	Yes
CP096750.1	A. baumannii	p5666_1	Rep_3	r3-T4	-	11194	5666	SAMN24114654	Asia	China	blood	Clinical	2016	None	-	Yes
CP096752.1	A. baumannii	p5666_3	Rep_3	r3-T3	-	110967	5666	SAMN24114654	Asia	China	blood	Clinical	2016	None	-	Yes
CP096758.1	A. baumannii	p5656	Rep_3	r3-T4	-	11194	5656	SAMN24114649	Asia	China	blood	Clinical	2014	None	-	Yes
CP096760.1	A. baumannii	p5653_1	Rep_3	r3-T3	-	110967	5653	SAMN24114648	Asia	China	sputum	Clinical	2013	None	-	Yes
CP096761.1	A. baumannii	p5653_2	Rep_3	r3-T4	-	11194	5653	SAMN24114648	Asia	China	sputum	Clinical	2013	None	-	Yes
CP096765.1	A. baumannii	p5634	Rep_3	r3-T3	-	110970	5634	SAMN24114646	Asia	China	sputum	Clinical	2013	None	-	Yes
CP096767.1	A. baumannii	p5626	Rep_3	r3-T3	-	110967	5626	SAMN24114645	Asia	China	sputum	Clinical	2005	None	-	Yes
CP096770.1	A. baumannii	p5388_2	Rep_3	r3-T3	-	110966	5388	SAMN24114644	Asia	China	blood	Clinical	2016	None	-	Yes
CP098796.1	A. baumannii	p1VB280821	Rep_3	r3-T28	-	141631	VB280821	SAMN28981486	Asia	India	blood	Clinical	2020	Multiple including carbapenem	aacC2d, strA, mph(E), msr(E), aphA6, blaOXA-58, sul1, blaCARB2, blaNDM-1	Yes
CP098798.1	A. baumannii	p3VB280821	Rep_3	r3-T14	-	10043	VB280821	SAMN28981486	Asia	India	blood	Clinical	2020	Tetracycline	tet39	Yes
CP099789.1	A. baumannii	pNCCP15995*	Rep_3	r3-T1	-	8744	NCCP 15995	SAMN29325273	Asia	South Korea	unknown	Clinical	2013	None	-	Yes
CP099792.1	A. baumannii	p2NCCP15996*	Rep_3	r3-T1	-	8735	NCCP 15996	SAMN29325381	Asia	South Korea	urine	Clinical	2013	None	-	Yes
CP099796.1	A. baumannii	pNCCP16011*	Rep_3	r3-T1	-	8735	NCCP 16011	SAMN29327161	Asia	South Korea	unknown	Clinical	2011	None	-	Yes
CP100307.1	A. baumannii	p2KBN10P05679*	Rep_3	r3-T1	-	8731	KBN10P05679	SAMN29388303	Asia	South Korea	sputum	Clinical	2018	None	-	Yes
CU459137.1	A. baumannii	p1ABAYE	Rep_3	r3-T18	-	5644	AYE	SAMEA3138279	Europe	France	blood	Clinical	2001	None	-	Yes
CU459138.1	A. baumannii	p2ABAYE	Rep_3	r3-T1	-	9661	AYE	SAMEA3138279	Europe	France	blood	Clinical	2001	None	-	Yes
CU459140.1	A. baumannii	p3ABAYE	Rep_3	r3-T7	-	94413	AYE	SAMEA3138279	Europe	France	blood	Clinical	2001	None	-	Yes
CU468231.1	A. baumannii	p1ABSDF	Rep_3	r3-T38	-	6106	SDF	SAMEA3138277	Europe	France	Body lice	Clinical	nr	None	-	Yes
CU468232.1	A. baumannii	p2ABSDF	Rep_3	multi-rep	-	25104	SDF	SAMEA3138277	Europe	France	Body lice	Clinical	nr	None	-	Yes
CU468233.1	A. baumannii	p3ABSDF	Rep_3	multi-rep	-	24922	SDF	SAMEA3138277	Europe	France	Body lice	Clinical	nr	None	-	Yes
FM210331.1	A. baumannii	pABVA01	Rep_3	r3-T2	-	8963	VA-566/00	SAMN14229501	Europe	Italy	bronchoalveolar lavage fluid	Clinical	2000	None	-	Yes
GQ476987.1	A. baumannii	pMMCU2	Rep_3	r3-T8	-	10270	CU2	SAMN14225384	Europe	Spain	unknown	Unknown	nr	Carbapenem	blaOXA-24	Yes
GQ904226.1	A. baumannii	pMMD	Rep_3	r3-T8	-	9964	-	SAMN14225471	Europe	Spain	unknown	Unknown	nr	Carbapenem	blaOXA-24	Yes
HG380023.1	A. baumannii	ABIBUN107mP1	Rep_3	r3-T1	-	8731	107m	SAMN14229284	South America	Colombia	unknown	Unknown	nr	None	-	Yes
HG977525.1	A. baumannii	pCS01C	Rep_3	r3-T2	-	8174	CS01	SAMEA3158456	Europe	Switzerland	Cerebrospinal fluid	Clinical	nr	None	-	Yes
HG977529.1	A. baumannii	pCR17C	Rep_3	r3-T2	-	8047	CR17	SAMEA3158506	Europe	Switzerland	unknown	Environment	nr	None	-	Yes
JACGEJ010000130.1	A. baumannii	pAbCTX19_9kb	Rep_3	r3-T1	-	8970	AbCTX19	SAMN15501050	Europe	France	Rectal swab	Clinical	2019	Carbapenem	blaOXA-72	Yes
JACGEK010000079.1	A. baumannii	pAbCTX17_7kb	Rep_3	r3-T10	-	7055	AbCTX17	SAMN15501052	Europe	France	Throat sample	Clinical	2019	Carbapenem	blaOXA-72	Yes
JADAIY010000264.1	A. baumannii	pRes13-Abat-PEA28-P5-02-A	Rep_3	r3-T15	-	2279	Res13-Abat-PEA28-P5-02-A	SAMN16304042	North America	Canada	pig swab	Animal	2018	None	-	Yes
JADAJJ010000299.1	A. baumannii	pRes13-Abat-PEA16-P5-01-A	Rep_3	r3-T29	-	14288	Res13-Abat-PEA16-P5-01-A	SAMN16304029	North America	Canada	pig swab	Animal	2018	None	-	Yes
JADAJL010000301.1	A. baumannii	pRes13-Abat-EA3-S5-02-A	Rep_3	r3-T29	-	14288	Res13-Abat-EA3-S5-02-A	SAMN16304027	North America	Canada	pig swab	Animal	2018	None	-	Yes
JAHPZP010000050.1	A. baumannii	pAci46b	Rep_3	r3-T1	-	8808	Aci46	SAMN19771046	Africa	Thailand	pneumonia	Clinical	2005	None	-	Yes
JHUI01000005.1	A. baumannii	pAB5075	Rep_3	r3-T1	-	8819	15A5	SAMN06650264	Asia	South Korea	Pulmonary	Clinical	2013	None	-	Yes
JX069966.1	A. baumannii	pAB120	Rep_3	r3-T1	-	10879	K60	SAMN14226317	Europe	Lithuania	respiratory tract	Clinical	2010	Carbapenem	blaOXA-72, blaOXA-72	Yes
KJ534568.1	A. baumannii	AbATCC223	Rep_3	r3-T2	-	8840	ATCC 223	SAMN14226773	Europe	Spain	unknown	Unknown	nr	Carbapenem	blaOXA-24	Yes
KJ534569.1	A. baumannii	AbATCC329	Rep_3	r3-T2	-	8842	ATCC 329	SAMN14226772	Europe	Spain	unknown	Unknown	nr	Carbapenem	blaOXA-24	Yes
KJ586856.1	A. baumannii	pAB-G7-1,	Rep_3	r3-T1	-	8731	G7	SAMN14226822	Pacific	Australia	unknown	Unknown	2002	None	-	Yes
KM051986.1	A. baumannii	pD72-1	Rep_3	r3-T2	-	10967	D72	SAMN14226464	Pacific	Australia	unknown	Unknown	2010	None	-	Yes
KR535993.1	A. baumannii	pA105-2	Rep_3	r3-T1	-	9830	A105	SAMN14226627	Europe	Sweden	bronchial secretion	Clinical	2013	Carbapenem	blaOXA-72	Yes
KT852971.1	A. baumannii	p255n_1	Rep_3	r3-T7	-	92939	255_n	SAMN14226423	Asia	Vietnam	nasal swab	Clinical	2005	Multiple including carbapenem	blaVEB-1, aadB, arr-3, cmlA1, ant(3'')-la, sul1, msr(E), mph(E), cmlB1, sul2, blaOXA-58, aacC2d	Yes
KU869528.1	A. baumannii	pA297-2	Rep_3	r3-T1	-	8731	A297(RUH875)	SAMN14227234	Europe	Netherlands	unknown	Unknown	1984	None	-	Yes
KX230793.1	A. baumannii	pMAL-1	Rep_3	r3-T1	-	9810	MAL	SAMN14227146	Europe	France	cat urine	Animal	nr	Carbapenem	blaOXA-72	Yes
KY202456.1	A. baumannii	pIBAC_oxa58_1433	Rep_3	r3-T1	-	26496	AB1433	SAMN14227361	Europe	Italy	unknown	Unknown	nr	Carbapenem	blaOXA-58	Yes
KY202457.1	A. baumannii	pIBAC_oxa58_2RED	Rep_3	r3-T1	-	25311	AB2RED09	SAMN14227360	Europe	Italy	unknown	Unknown	nr	Carbapenem	blaOXA-58	Yes
KY202458.1	A. baumannii	pIBAC_oxa58_20C15	Rep_3	r3-T1	-	26781	AB20C15	SAMN14227359	Europe	Italy	unknown	Unknown	nr	Carbapenem	blaOXA-58	Yes
KY216144.1	A. baumannii	pRCH51-3	Rep_3	r3-T20	-	52789	RCH51	-	Pacific	Australia	unknown	Unknown	nr	Multiple including carbapenem	sul2, floR, blaOXA-235	Yes
KY704308.1	A. baumannii	pAbIHIT32296	Rep_3	r3-T24	-	8493	IHIT32296	SAMN14227859	Europe	Luxembourg	parrot nose	Animal	2016	Carbapenem	blaOXA-72	Yes
KY984045.1	A. baumannii	pAb242_9	Rep_3	r3-T14	-	9284	AB242	SAMN07509424	South America	Argentina	ascitic fluid	Clinical	1997	None	-	Yes
LN833432.1	A. baumannii	pNDM-32	Rep_3	r3-T28	-	84623	CHI-32	SAMEA3298506	Asia	India	blood	Clinical	2005	Multiple	aacC2d, blaNDM-1, mph(E), msr(E), armA, sul1, aadA2, dfrA12, ant(3'')-la	Yes
LN997847.1	A. baumannii	pR2091	Rep_3	r3-T31	-	7742	R2091	SAMEA3715145	Europe	France	tissue	Clinical	2014	None	-	Yes
LT594096.1	A. baumannii	pBAL062	Rep_3	r3-T4	-	8015	BAL062	SAMEA2439285	Europe	United Kingdom	unknown	Clinical	nr	None	-	Yes
LT984691.1	A. baumannii	p1K50	Rep_3	r3-T10	-	9539	K50	SAMEA104446236	Middle East	Kuwait	wound	Clinical	2008	None	-	Yes
MG100202.1	A. baumannii	pAb825_36	Rep_3	multi-rep	-	35743	Ab825	SAMN14228542	South America	Argentina	wound	Clinical	nr	Multiple including carbapenem	aacC2, aphA6, blaOXA-58	Yes
MG520098.1	A. baumannii	pAb244_7	Rep_3	r3-T14	-	7965	Ab244	SAMN14228448	South America	Argentina	unknown	Unknown	nr	None	-	Yes
MG954376.1	A. baumannii	pS21-1	Rep_3	r3-T2	-	12952	SGH9601	SAMN14228298	Asia	Singapore	unknown	Unknown	1996	Aminoglycoside	aphA6	Yes
MG954378.1	A. baumannii	pS32-1	Rep_3	r3-T1	-	13545	SGH0905	SAMN14228296	Asia	Singapore	unknown	Unknown	2009	Carbapenem	blaOXA-23	Yes
MH362811.1	A. baumannii	pO237-3	Rep_3	r3-T1	-	18475	11A1314CRGN088	SAMN07258672	North America	Canada	unknown	Unknown	2013	Carbapenem	blaOXA-237, blaOXA-237	Yes
MH362812.1	A. baumannii	pO237-1	Rep_3	r3-T1	-	15199	11A1213CRGN008	SAMN07258655	North America	Canada	unknown	Unknown	2013	Carbapenem	blaOXA-237	Yes
MH362813.1	A. baumannii	pO237-2	Rep_3	r3-T1	-	18475	11A1213CRGN055	SAMN07258647	North America	Canada	unknown	Unknown	2012	Carbapenem	blaOXA-237, blaOXA-237	Yes
MK323042.1	A. baumannii	pAb45063_a	Rep_3	r3-T14	-	19808	Acb-45063	SAMN14228622	South America	Brazil	unknown	Unknown	nr	Multiple including carbapenem	blaTEM, aacC2, blaOXA-58	Yes
MK386680.1	A. baumannii	pABAY04001_1A	Rep_3	r3-T3	-	110967	ABAY04001	SAMN14228692	Asia	South Korea	unknown	Unknown	nr	None	-	Yes
MK386683.1	A. baumannii	pABAY14012_4D	Rep_3	r3-T1	-	8753	ABAY14012	SAMN14228689	Asia	South Korea	unknown	Unknown	nr	None	-	Yes
MK386684.1	A. baumannii	pABAY15001_6E	Rep_3	r3-T15	-	2278	ABAY15001	SAMN14228688	Asia	South Korea	unknown	Unknown	nr	None	-	Yes
MK431775.1	A. baumannii	pO237-4	Rep_3	r3-T1	-	15199	11A14CRGN003	SAMN14229072	North America	Canada	unknown	Clinical	2014	Carbapenem	blaOXA-237	Yes
MK531537.1	A. baumannii	pMC1.2/pMC23.2	Rep_3	r3-T1	-	8731	MC1/MC23	-	South America	Bolivia	urine	Clinical	2015	None	-	Yes
MK531541.1	A. baumannii	pMC75.2	Rep_3	r3-T14	-	13903	MC75	-	South America	Bolivia	ulcer	Clinical	2016	Multiple	blaTEM, aacC2	Yes
MN266872.1	A. baumannii	pAC1-BRL	Rep_3	multi-rep	-	16673	N/A	-	South America	Brazil	Duck choanal swab	Animal	nr	Multiple including carbapenem	blaOXA-72, msr(E), mph(E)	Yes
MN495625.1	A. baumannii	pA2485	Rep_3	multi-rep	-	15405	A2485	-	Asia	China	sputum	Clinical	nr	Carbapenem	blaOXA-72	Yes
MN495626.1	A. baumannii	pA2503	Rep_3	multi-rep	-	15405	A2503	-	Asia	China	sputum	Clinical	nr	Carbapenem	blaOXA-72	Yes
NC_023280.1	A. nosocomialis	pRAY-v3	No Rep	-	pRAY	6078	178	SAMN14225929	Pacific	Australia	nr	Clinical	nr	Aminoglycoside	aadB	No
NZ_CP010370.2	A. nosocomialis	p6411-9.012kb	No Rep	-	NDM	47274	6411	SAMN03263968	South America	Colombia	Excreted bodily substance	Clinical	2012	Multiple	aph(3')-VI, blaNDM-1, ble-MBL	No
NZ_CP107578.1	A. baumannii	unnamed1	No Rep	-	pAba115106	19667	1326359	SAMN30898311	North America	USA	Cervical	Clinical	2018	None	-	No
NZ_CP107602.1	A. baumannii	unnamed1	No Rep	-	pAba115106	19667	1326589	SAMN30898326	North America	USA	Skin	Clinical	2018	None	-	No
NZ_CP107604.1	A. baumannii	unnamed1	No Rep	-	pAba115106	19662	1326595	SAMN30898327	North America	USA	Skin	Clinical	2018	None	-	No
NZ_CP079744.1	A. baumannii	unnamed	No Rep	-	No rep	11600	4117201	SAMN20255403	Pacific	Australia	Human reacheal aspirate	Clinical	2004	None	-	No
NZ_CP039144.1	Acinetobacter sp.	p10FS3-1-1	No Rep	-	No rep	395494	10FS3-1	SAMN11349729	Asia	China	Pig faeces	Animal	2015	None	-	No
NZ_CP039147.1	Acinetobacter sp.	p10FS3-1-4	No Rep	-	No rep	54764	10FS3-1	SAMN11349729	Asia	China	Pig faeces	Animal	2015	Carbapenem	blaOXA-58	No
NZ_CP039154.1	Acinetobacter sp.	p10FS3-1-11	No Rep	-	pRAY	8462	10FS3-1	SAMN11349729	Asia	China	Pig faeces	Animal	2015	None	-	No
NZ_CP039155.1	Acinetobacter sp.	p10FS3-1-12	No Rep	-	No rep	5881	10FS3-1	SAMN11349729	Asia	China	Pig faeces	Animal	2015	None	-	No
NZ_MT742180.1	A. lwoffii	pR4WN_12CE1	No Rep	-	p2014S07	270906	12CE1	-	Pacific	Ausralia	Prawn digestive tract	Animal	2009	Multiple	sul1, aadA2	No
NZ_CP107580.1	A. baumannii	unnamed1	No Rep	-	pAba115106	19667	1326525-1	SAMN30898312	North America	USA	Skin	Clinical	2018	None	-	No
NZ_CP107582.1	A. baumannii	unnamed1	No Rep	-	pAba115106	19667	1326525-2	SAMN30898313	North America	USA	Skin	Clinical	2018	None	-	No
NZ_CP107584.1	A. baumannii	unnamed1	No Rep	-	pAba115106	19663	1326525-3	SAMN30898314	North America	USA	Skin	Clinical	2018	None	-	No
NZ_CP107586.1	A. baumannii	unnamed1	No Rep	-	pAba115106	19667	1326527-1	SAMN30898315	North America	USA	Skin	Clinical	2018	None	-	No
NZ_CP107596.1	A. baumannii	unnamed1	No Rep	-	pAba115106	19667	1326581-1	SAMN30898323	North America	USA	Wound	Clinical	2018	None	-	No
NZ_CP107598.1	A. baumannii	unnamed1	No Rep	-	pAba115106	19667	1326581-2	SAMN30898324	North America	USA	Wound	Clinical	2018	None	-	No
NZ_CP107609.1	A. baumannii	unnamed1	No Rep	-	pAba115106	19667	1326924-2	SAMN30898328	North America	USA	Environment	Environment	2018	None	-	No
NZ_CP107611.1	A. baumannii	unnamed1	No Rep	-	pAba115106	19667	1326924-3	SAMN30898329	North America	USA	Environment	Environment	2018	None	-	No
NZ_CP107613.1	A. baumannii	unnamed1	No Rep	-	pAba115106	19667	1326927-1	SAMN30898330	North America	USA	Environment	Environment	2018	None	-	No
NZ_CP107615.1	A. baumannii	unnamed1	No Rep	-	pAba115106	19667	1326927-2	SAMN30898331	North America	USA	Environment	Environment	2018	None	-	No
NC_017164.1	A. baumannii	ABKp2	No Rep	-	No rep	8041	1656-2	SAMN02603494	Asia	South Korea	Sputum	Clinical	nr	None	-	No
NZ_CP079932.1	A. baumannii	pAB3	No Rep	-	297-3	148955	17978UN	SAMN20326334	Europe	France	nr	Unknown	1951	Sulphonamide	sul2	No
NZ_MT742182.1	Acinetobacter sp.	pR4WN_1BD1	No Rep	-	p2014S07	284751	1BD1	-	Pacific	Australia	Prawn digestive tract	Animal	2008	Multiple	sul1, aadA2	No
NZ_CP104343.1	A. baumannii	unnamed1	No Rep	-	p2014S07	335718	2021CK-01300	SAMN21493827	North America	USA	Wound/Abscess	Clinical	2021	Multiple including carbapenem	blaOXA-58, aph(3')-VI, blaNDM-1, ble-MBL, sul1, aac(6')-Ib4, arr-3, msr(E), mph(E), strA, strB, sul2, tet(X)	No
NZ_CP104345.1	A. baumannii	unnamed2	No Rep	-	p2014S07	338291	2021CK-01332	SAMN21493859	North America	USA	Wound/Abscess	Clinical	2021	Multiple including carbapenem	tet(X), sul2, strA, strB, msr(E), mph(E), arr-3, aac(6')-Ib4, sul1, ble-MBL, blaNDM-1, aph(3')-VI, blaOXA-58	No
NZ_CP104346.1	A. baumannii	unnamed1	No Rep	-	No rep	50025	2021CK-01332	SAMN21493859	North America	USA	Wound/Abscess	Clinical	2021	None	-	No
NZ_CP104348.1	A. baumannii	unnamed2	No Rep	-	p2014S07	335558	2021CK-01333	SAMN21493860	North America	USA	Sputum	Clinical	2021	Multiple including carbapenem	msr(E), mph(E), strA, strB, sul2, tet(X), blaOXA-58, aph(3')-VI, blaNDM-1, ble-MBL, sul1, aac(6')-Ib4, arr-3	No
NZ_CP104349.1	A. baumannii	unnamed1	No Rep	-	No rep	50025	2021CK-01333	SAMN21493860	North America	USA	Sputum	Clinical	2021	None	-	No
NZ_CP104352.1	A. baumannii	unnamed1	No Rep	-	p2014S07	335718	2021CK-01335	SAMN21493862	North America	USA	Wound/Abscess	Clinical	2021	Multiple including carbapenem	tet(X), sul2, strA, strB, msr(E), mph(E), arr-3, aac(6')-Ib4, sul1, ble-MBL, blaNDM-1, aph(3')-VI, blaOXA-58	No
NZ_CP104447.1	A. baumannii	unnamed2	No Rep	-	p2014S07	335722	2021CK-01407	SAMN21924069	North America	USA	Sputum	Clinical	2021	Multiple including carbapenem	blaOXA-58, tet(X), sul2, strA, strB, msr(E), mph(E), arr-3, aac(6')-Ib4, sul1, ble-MBL, blaNDM-1, aph(3')-VI	No
NZ_CP104337.1	A. baumannii	unnamed3	No Rep	-	No rep	50089	2021CK-01408	SAMN21924070	North America	USA	Blood	Clinical	2021	None	-	No
NZ_CP104339.1	A. baumannii	unnamed2	No Rep	-	p2014S07	329791	2021CK-01409	SAMN21924071	North America	USA	Wound/Abscess	Clinical	2021	Multiple including carbapenem	blaNDM-1, ble-MBL, sul1, aac(6')-Ib4, arr-3, msr(E), mph(E), strA, strB, sul2, tet(X), blaOXA-58	No
NZ_CP104341.1	A. baumannii	unnamed1	No Rep	-	No rep	50022	2021CK-01409	SAMN21924071	North America	USA	Wound/Abscess	Clinical	2021	None	-	No
CP115633.1	A. baumannii	unnamed1	No Rep	-	pAba115106	19659	2022CK-00063	SAMN25755497	North America	USA	Sputum	Clinical	2022	None	-	No
CP115625.1	A. baumannii	unnamed2	No Rep	-	pAba115106	18774	2022CK-00340	SAMN28788566	North America	USA	Wound/Abscess	Clincial	2022	None	-	No
CP115647.1	A. baumannii	unnamed2	No Rep	-	No rep	2775	2022CK-00371	SAMN29151496	North America	USA	Skin	Clinical	2022	None	-	No
CP115622.1	A. baumannii	unnamed1	No Rep	-	pAba115106	18774	2022CK-00480	SAMN30655645	North America	USA	Sputum	Clinical	2022	None	-	No
NZ_CP117761.1	A. baumannii	unnamed1	No Rep	-	No rep	3030	2022CK-00839	SAMN32734006	North America	USA	Blood	Clinical	2022	None	-	No
NZ_CP031996.1	A. haemolyticus	pAhaem2126chb	No Rep	-	No rep	5594	2126ch	SAMN09927970	North America	Mexico	Ascites liquid	Clinical	2011	None	-	No
NZ_CP041293.1	A. indicus	p80-1-2-p5	No Rep	-	No rep	3818	80-1-2	SAMN12158191	Asia	China	Cow	Animal	2019	None	-	No
NZ_CP041287.1	A. indicus	p94-2-p4	No Rep	-	No rep	4086	94-2	SAMN12158188	Asia	China	Cow	Animal	2018	None	-	No
NZ_CP041288.1	A. indicus	p94-2-p2	No Rep	-	No rep	16559	94-2	SAMN12158188	Asia	China	Cow	Animal	2018	None	-	No
NZ_CP103342.1	A. baumannii	unnamed5	No Rep	-	No rep	2421	AB105	SAMN30068511	Asia	China	Human	Clinical	2022	None	-	No
CP119233.1	A. baumannii	pAB322-3	No Rep	-	No rep	3611	AB322	SAMN33446574	Asia	Taiwan	Blood	Clincal	2001	None	-	No
NZ_CP102818.1	A. baumannii	unnamed1	No Rep	-	pAba115106	15315	AB40-VUB	SAMN25131641	Europe	Belgium	Blood	Clinical	2014	Carbapenem	blaOXA-72	No
NZ_CP114384.1	A. baumannii	pAB0155-3	No Rep	-	No rep	1887	AB6870155	SAMN03105183	Pacific	Australia	Sputum	Clinical	2002	None	-	No
NZ_JQ739157.1	A. pittii	pABCA95	No Rep	-	No rep	6544	ABCA95	SAMN14226234	Asia	China	Sputum	Clinical	2009-2010	Multiple	aph(3')-VI, blaNDM-1, ble-MBL	No
NZ_CP029006.1	A. pittii	pAbW39-1	No Rep	-	297-3	262817	AbW39	SAMN08968574	Asia	China	Fish	Animal	2013	Multiple	sul2, strA, strB	No
NZ_JQ739158.1	A. lwoffii	pABZ78	No Rep	-	No rep	4797	ABZ78	SAMN14226233	Asia	China	Blood	Clinical	2009-2010	Other	ble-MBL	No
NZ_CP045561.1	A. nosocomialis	pAC1530	No Rep	-	No rep	173972	AC1530	SAMN13066419	Asia	Malaysia	Blood	Clinical	2015	Multiple including carbapenem	aacC2d, sul2, blaNDM-1, ble-MBL, strA, strB, blaOXA-58, mph(E), msr(E)	No
NZ_CP015617.1	A. schindleri	p2AsACE	No Rep	-	NDM	45079	ACE	SAMN04956557	North America	Mexico	Laboratory	Clinical	2013	Aminoglycoside	apha7, strA, strB	No
NZ_CP015618.1	A. schindleri	p3AsACE	No Rep	-	No rep	14058	ACE	SAMN04956557	North America	Mexico	Laboratory	Clinical	2013	Macrolide	msr(E), mph(E)	No
NZ_CP026425.1	Acinetobacter sp.	pNDM-9c17	No Rep	-	NDM	39361	ACNIH1	SAMN03455971	North America	USA	Hopsital plumbing	Waste water	2014	Multiple	aph(3')-VI, blaNDM-1, ble-MBL	No
NZ_CP026414.1	Acinetobacter sp.	pACI-235c	No Rep	-	No rep	17598	ACNIH2	SAMN04287023	North America	USA	Wastewater	Waste water	2015	Multiple	tet39, msr(E), mph(E)	No
NZ_CP026419.1	Acinetobacter sp.	pACI-6db8	No Rep	-	No rep	41447	ACNIH2	SAMN04287023	North America	USA	Wastewater	Waste water	2015	None	-	No
NZ_CP043309.1	A. johnsonii	pAcsw19-2	No Rep	-	p2014S07	351885	Acsw19	SAMN12630603	Asia	China	Sewage	Waste water	2019	Multiple including carbapenem	cmlB1, msr(E), mph(E), blaOXA-58, ble-MBL, blaNDM-1, aphA6	No
NZ_CM016430.1	A. towneri	pNDM-AeBJ009	No Rep	-	NDM	47271	AeBJ009	SAMN10737689	Asia	China	Hospital sewage	Waste water	nr	Multiple	aph(3')-VI, blaNDM-1, ble-MBL	No
NZ_CP092455.1	Acinetobacter sp.	unnamed1	No Rep	-	No rep	37296	AHP123	SAMN25342883	Asia	China	Activated sludge from wastewater treatment plants	Waste water	2021	None	-	No
NZ_CP078043.1	A. junii	pAJ_068-2	No Rep	-	p2014S07	264416	AJ_068	SAMN10249224	Asia	Pakistan	Washroom sink in hospital intensive care unit	Clinical	2016	Multiple	blaOXA-58, msr(E), mph(E), strA, strB, aacC2d, aphA6, sul1, aac(6')-Ib4, arr-3, aph(3')-VI, blaNDM-1, ble-MBL, sul2, str, strB, floR	No
NZ_CP079793.1	A. johnsonii	pAJ_082-2	No Rep	-	p2014S07	340235	AJ_082	SAMN10249157	Asia	Pakistan	Washroom sink in hospital intensive care unit	Clinical	2016	Multiple	sul2, strA, strB, msr(E), mph(E), ble-MBL, blaNDM-1, arr-3, aac(6')-Ib4, sul1, aphA6	No
NZ_CP079798.1	A. johnsonii	pAJ_082-7	No Rep	-	No rep	6005	AJ_082	SAMN10249157	Asia	Pakistan	Washroom sink in hospital intensive care unit	Clinical	2016	None	-	No
NZ_CP078019.1	A. junii	pAJ_351-2	No Rep	-	p2014S07	332451	AJ_351	SAMN10249206	Asia	Pakistan	Washroom sink in hospital intensive care unit	Clinical	2016	Multiple including carbapenem	tet(X), sul2, strA, strB, msr(E), mph(E), arr-3, aac(6')-Ib4, sul1, ble-MBL, blaNDM-1, aphA6, msr(E), mph(E), blaOXA-58	No
NZ_CP041229.1	A. haemolyticus	pAhaeAN54e	No Rep	-	NDM	45460	AN54	SAMN08707400	North America	Mexico	Peritoneal dialysis fluid	Clinical	2016	Multiple	aph(3')-VI, blaNDM-1, ble-MBL	No
NZ_OM046572.1	A. nosocomialis	pHUAV/AMR-R	No Rep	-	p2014S07	300837	AN66	-	Europe	Spain	Sputum/Urine	Clinical	2020	Multiple	aacC2e, strA, strB, blaMCA, msr(E), mph(E)	No
NZ_CP014478.1	A. pittii	pNDM-AP_882	No Rep	-	No rep	146597	AP_882	SAMN04495667	Asia	Malaysia	Wound swab	Clinical	2014	Multiple	strA, strB, aacC2d, sul2, blaNDM-1, ble-MBL	No
NZ_CP087717.1	A. pittii	pAP2044-1	No Rep	-	p2014S07	283349	AP2044	SAMN23335262	Asia	China	Hydrothorax	Clinical	2020	Multiple	aacC2d, ble-MBL, blaNDM-1, aphA6	No
NZ_CP043053.1	A. pittii	pAP43-OXA58-NDM1	No Rep	-	p2014S07	268263	AP43	SAMN12612836	Asia	China	Urine	Clinical	2018	Multiple including carbapenem	ble-MBL, blaNDM-1, aphA6, aacC2d, blaOXA-58, msr(E), mph(E), floR	No
NZ_CP119224.1	A. proteolyticus	pAP54-1	No Rep	-	p2014S07	248123	AP54	SAMN33546470	Asia	Taiwan	Blood	Clincal	1997	Multiple including carbapenem	sul1, aadA5, aac(6')-IIa, blaIMP-1, floR, msr(E), mph(E), sul2, blaOXA-164, sul1, dfrA1, aphA6, aphA6	No
NZ_CP027659.1	A. pittii	pApW20-1	No Rep	-	297-3	237519	Ap-W20	SAMN08683320	Asia	China	Fish	Animal	2013	Multiple	sul2, strA, strB	No
NZ_CP061680.1	A. seifertii	pAS11-2	No Rep	-	pRAY	6077	AS11	SAMN16092214	Asia	Taiwan	Blood	Clinical	2010-2017	Aminoglycoside	aadB	No
NZ_CP061668.1	A. seifertii	pAS25-2	No Rep	-	pRAY	6079	AS25	SAMN16092218	Asia	Taiwan	Blood	Clinical	2010-2017	Aminoglycoside	aadB	No
NZ_CP061663.1	A. seifertii	pAS31-3	No Rep	-	pRAY	6079	AS31	SAMN16092220	Asia	Taiwan	Blood	Clinical	2010-2017	Aminoglycoside	aadB	No
NZ_CP061641.1	A. seifertii	pAS40-1	No Rep	-	297-3	134105	AS40	SAMN16092224	Asia	Taiwan	Blood	Clinical	2010-2017	Multiple	aphA6, strA, strB, tet(B), sul2	No
NZ_CP061644.1	A. seifertii	pAS40-4	No Rep	-	pRAY	6162	AS40	SAMN16092224	Asia	Taiwan	Blood	Clinical	2010-2017	Aminoglycoside	aadB	No
NZ_CP061635.1	A. seifertii	pAS41-1	No Rep	-	297-3	134108	AS41	SAMN16092225	Asia	Taiwan	Blood	Clinical	2010-2017	Multiple	sul2, tet(B), strA, strB, aphA6	No
NZ_CP061638.1	A. seifertii	pAS41-4	No Rep	-	pRAY	6078	AS41	SAMN16092225	Asia	Taiwan	Blood	Clinical	2010-2017	Aminoglycoside	aadB	No
NZ_CP061829.1	A. seifertii	pAS42-1	No Rep	-	297-3	134107	AS42	SAMN16092226	Asia	Taiwan	Blood	Clinical	2010-2017	Multiple	aphA6, strA, strB, tet(B), sul2	No
NZ_CP061630.1	A. seifertii	pAS47-1	No Rep	-	297-3	134106	AS47	SAMN16092227	Asia	Taiwan	Blood	Clinical	2010-2017	Multiple	aphA6, strA, strB, tet(B), sul2	No
NZ_CP061633.1	A. seifertii	pAS47-4	No Rep	-	pRAY	6078	AS47	SAMN16092227	Asia	Taiwan	Blood	Clinical	2010-2017	Aminoglycoside	aadB	No
NZ_CP061621.1	A. seifertii	pAS49-1	No Rep	-	297-3	134105	AS49	SAMN16092229	Asia	Taiwan	Blood	Clinical	2010-2017	Multiple	aphA6, strA, strB, tet(B), sul2	No
NZ_CP061624.1	A. seifertii	pAS49-4	No Rep	-	pRAY	6078	AS49	SAMN16092229	Asia	Taiwan	Blood	Clinical	2010-2017	Aminoglycoside	aadB	No
NZ_CP061684.1	A. seifertii	pAS5-1	No Rep	-	297-3	134105	AS5	SAMN16092211	Asia	Taiwan	Blood	Clinical	2010-2017	Multiple	aphA6, strA, strB, tet(B), sul2	No
NZ_CP061686.1	A. seifertii	pAS5-3	No Rep	-	pRAY	6078	AS5	SAMN16092211	Asia	Taiwan	Blood	Clinical	2010-2017	Aminoglycoside	aadB	No
NZ_CP061614.1	A. seifertii	pAS51-1	No Rep	-	297-3	135195	AS51	SAMN16092230	Asia	Taiwan	Blood	Clinical	2010-2017	Multiple	aphA6, strA, strB, tet(B), sul2	No
NZ_CP061617.1	A. seifertii	pAS51-4	No Rep	-	No rep	37244	AS51	SAMN16092230	Asia	Taiwan	Blood	Clinical	2010-2017	None	-	No
NZ_CP061618.1	A. seifertii	pAS51-5	No Rep	-	pRAY	6078	AS51	SAMN16092230	Asia	Taiwan	Blood	Clinical	2010-2017	Aminoglycoside	aadB	No
NZ_CP061604.1	A. seifertii	pAS53-1	No Rep	-	297-3	135196	AS53	SAMN16092232	Asia	Taiwan	Blood	Clinical	2010-2017	Multiple	aphA6, strA, strB, tet(B), sul2	No
NZ_CP061607.1	A. seifertii	pAS53-4	No Rep	-	pRAY	6078	AS53	SAMN16092232	Asia	Taiwan	Blood	Clinical	2010-2017	Aminoglycoside	aadB	No
NZ_CP061594.1	A. seifertii	pAS60-2	No Rep	-	pRAY	6078	AS60	SAMN16092236	Asia	Taiwan	Blood	Clinical	2010-2017	Aminoglycoside	aadB	No
NZ_CP061583.1	A. seifertii	pAS62-1	No Rep	-	297-3	134107	AS62	SAMN16092238	Asia	Taiwan	Blood	Clinical	2010-2017	Multiple	aphA6, strA, strB, tet(B), sul2	No
NZ_CP061587.1	A. seifertii	pAS62-5	No Rep	-	pRAY	6077	AS62	SAMN16092238	Asia	Taiwan	Blood	Clinical	2010-2017	Aminoglycoside	aadB	No
NZ_CP061580.1	A. seifertii	pAS63-2	No Rep	-	pRAY	6078	AS63	SAMN16092239	Asia	Taiwan	Blood	Clinical	2010-2017	Aminoglycoside	aadB	No
NZ_CP061564.1	A. seifertii	pAS73-3	No Rep	-	pALWEK1.15	4394	AS73	SAMN16092243	Asia	Taiwan	Blood	Clinical	2010-2017	None	-	No
NZ_CP044456.1	A. indicus	pB18-1	No Rep	-	No rep	274859	B18	SAMN12429970	Asia	China	Pigeon	Animal	2016	None	-	No
NZ_CP044458.1	A. indicus	pB18-3	No Rep	-	No rep	84177	B18	SAMN12429970	Asia	China	Pigeon	Animal	2016	None	-	No
NZ_CP044459.1	A. indicus	pB18-4	No Rep	-	No rep	33913	B18	SAMN12429970	Asia	China	Pigeon	Animal	2016	None	-	No
NZ_CP094260.1	A. indicus	pBDT201-2	No Rep	-	No rep	51220	BDT201	SAMN26688272	Asia	China	Pig	Animal	2020	Multiple including carbapenem	sul2, tet(X), aacC2d, blaOXA-58, floR	No
NZ_CP094255.1	A. indicus	pBDT2076-1	No Rep	-	No rep	15241	BDT2076	SAMN26688158	Asia	China	Chicken faeces	Animal	2020	None	-	No
NZ_CP048656.1	A. indicus	pC15-2	No Rep	-	No rep	68627	C15_T	SAMN13979600	Asia	China	Pig faeces	Animal	2015	None	-	No
NC_019311.1	A. baumannii	pRAY*-v1	No Rep	-	pRAY	6078	C2	SAMN14226072	Pacific	Australia	nr	Unknown	2007	Aminoglycoside	aadB	No
NZ_CP042365.1	A. pittii	pC54_001	No Rep	-	p2014S07	256887	C54	SAMN12289369	Pacific	Australia	Human	Clinical	2014	Multiple including carbapenem	aacC2d, aphA6, sul2, msr(E), mph(E), floR, sul1, catB3, aac(6')-Ib4, blaIMP-26, dfrA19, blaOXA-58	No
NZ_CP042369.1	A. pittii	pC54_005	No Rep	-	No rep	4478	C54	SAMN12289369	Pacific	Australia	Human	Clinical	2014	None	-	No
NZ_CP113452.1	A. baumannii	pC9_10	No Rep	-	No rep	2024	C9	SAMN25159974	North America	USA	Draining-Matting Conveyor	Environment	2019	None	-	No
NZ_CP113453.1	A. baumannii	pC9_11	No Rep	-	No rep	1691	C9	SAMN25159974	North America	USA	Draining-Matting Conveyor	Environment	2019	None	-	No
NC_023322.1	A. bereziniae	pNDM-40-1	No Rep	-	NDM	45826	CHI-40-1	SAMN14226053	Asia	India	Pus	Clinical	2005	Multiple	aph(3')-VI, blaNDM-1	No
NZ_CP067021.1	Acinetobacter sp.	unnamed2	No Rep	-	p2014S07	283930	CS-2	SAMN17142163	Asia	China	Hospital wastewater	Waste water	2020	Multiple including carbapenem	aph(3')-VI, blaNDM-1, ble-MBL, floR, msr(E), mph(E), sul2, blaOXA-58, aacC2d	No
NC_025068.1	A. baumannii	pRAY	No Rep	-	pRAY	6078	D36	SAMN04029125	Pacific	Australia	Wound	Clinical	2008	Aminoglycoside	aadB	No
NZ_AGFH01000030.1	A. pittii	pAB_D499	No Rep	-	NDM	47101	D499	SAMN02469352	Unknown	nr	nr	Unknown	nr	Multiple	aph(3')-VI, blaNDM-1, ble-MBL	No
NZ_CP087343.1	A. baumannii	p2DB008	No Rep	-	pALWEK1.15	5460	DB008	SAMN23078450	Europe	Germany	Human	Clinical	nr	None	-	No
NZ_MT742181.1	A. johnsonii	pR4WN_E10B	No Rep	-	p2014S07	259080	E10B	-	Pacific	Australia	Prawn digestive tract	Animal	2008	Multiple	sul1, aadA2	No
NC_019345.1	A. baumannii	pRAY*-v2	No Rep	-	pRAY	8433	E7	SAMN14226315	Pacific	Australia	Blood	Clinical	2008	Aminoglycoside	aadB	No
NC_002760.1	Acinetobacter sp.	pAC450	No Rep	-	No rep	4379	EB104	SAMN14229621	Europe	Germany	nr	Unknown	nr	None	-	No
NZ_CP032116.1	A. lwoffii	pALWED1.7	No Rep	-	pALWEK1.15	4861	ED23-35	SAMN05251102	Asia	Siberia	Permafrost	Environment	nr	None	-	No
NZ_CP032117.2	A. lwoffii	pALWED2.2	No Rep	-	No rep	43270	ED45-23	SAMN05251103	Asia	Siberia	Permafrost	Environment	nr	None	-	No
NZ_CP032288.1	A. lwoffii	pALWED3.3	No Rep	-	pALWEK1.15	8055	ED9-5a	SAMN05251104	Asia	Siberia	Permafrost	Environment	nr	None	-	No
NZ_CP032289.1	A. lwoffii	pALWED3.4	No Rep	-	No rep	12408	ED9-5a	SAMN05251104	Asia	Siberia	Permafrost	Environment	nr	None	-	No
NZ_CP032108.1	A. lwoffii	pALWEK1.6	No Rep	-	No rep	6886	EK30A	SAMN05251105	Asia	Siberia	Permafrost	Environment	nr	None	-	No
NZ_CP080642.1	A. lwoffii	pALWEK1.15	No Rep	-	pALWEK1.15	4677	EK30A	SAMN05251105	Asia	Siberia	Permafrost	Environment	nr	None	-	No
NZ_KX528688.1	A. lwoffii	pALWEK1.1	No Rep	-	No rep	37500	EK30A	SAMN14227065	Asia	Siberia	Permafrost	Environment	nr	None	-	No
NZ_MT771289.1	A. nosocomialis	pFA267	No Rep	-	No rep	140960	FA267	-	Asia	South Korea	Sputum	Clinical	2012	Multiple	aph(3')-VI, sul1, aadA1, aac(6')-Il, blaVIM-2	No
NZ_MT771290.1	A. nosocomialis	pFA648	No Rep	-	No rep	168915	FA648	-	Unknown	nr	Sputum	Clinical	2013	Multiple	aph(3')-VI, sul1, aadA1, aac(6')-Il, blaVIM-2, aph(3')-VI, sul1, aadA1, aac(6')-Il, blaVIM-2	No
NZ_CP077376.1	A. lwoffii	unnamed7	No Rep	-	No rep	6838	FDAARGOS 1394	SAMN16357536	Europe	Germany	nr	Unknown	nr	None	-	No
NZ_CP077307.1	A. pittii	unnamed4	No Rep	-	No rep	5594	FDAARGOS 1396	SAMN16357538	Europe	Germany	nr	Unknown	nr	None	-	No
NZ_CP068203.1	A. johnsonii	unnamed2	No Rep	-	No rep	22110	FDAARGOS_1092	SAMN16357261	Europe	Germany	nr	Unknown	nr	None	-	No
NZ_CP068209.1	A. johnsonii	unnamed7	No Rep	-	pRAY	6362	FDAARGOS_1092	SAMN16357261	Europe	Germany	nr	Unknown	nr	None	-	No
NZ_CP068210.1	A. johnsonii	unnamed8	No Rep	-	pALWEK1.15	3618	FDAARGOS_1092	SAMN16357261	Europe	Germany	nr	Unknown	nr	None	-	No
NZ_CP068193.1	A. johnsonii	unnamed8	No Rep	-	No rep	7350	FDAARGOS_1094	SAMN16357263	Europe	Germany	nr	Unknown	nr	None	-	No
NZ_CP068183.1	A. ursingii	unnamed3	No Rep	-	pRAY	5501	FDAARGOS_1095	SAMN16357264	Europe	Germany	nr	Unknown	nr	None	-	No
NZ_CP079899.1	A. septicus	unnamed	No Rep	-	p2014S07	369925	FDAARGOS_1401	SAMN16357543	Europe	Germany	nr	Unknown	nr	None	-	No
NZ_CP054823.1	A. lwoffii	unnamed3	No Rep	-	No rep	4605	FDAARGOS_551	SAMN10163244	North America	USA	Human	Clinical	nr	None	-	No
NZ_CP054826.1	A. lwoffii	unnamed5	No Rep	-	No rep	3616	FDAARGOS_551	SAMN10163244	North America	USA	Human	Clinical	nr	None	-	No
NZ_CP054904.1	Acinetobacter sp.	unnamed1	No Rep	-	pALWEK1.15	5829	FDAARGOS_724	SAMN11056439	North America	USA	Human	Clinical	nr	None	-	No
NZ_CP065663.1	A. johnsonii	unnamed1	No Rep	-	No rep	15161	FDAARGOS_910	SAMN13450440	Unknown	nr	nr	Unknown	nr	None	-	No
NZ_MW073138.1	Acinetobacter sp.	pNDM-FL51	No Rep	-	NDM	41068	FL51	-	South America	Brazil	Coastal water	Environment	2017	Multiple	ble-MBL, blaNDM-1, aph(3')-VI	No
NZ_KT965093.1	A. towneri	pNDM-GJ02	No Rep	-	No rep	62011	G295	SAMN14226440	Asia	China	Faeces	Clinical	2011	Multiple	blaNDM-1, ble-MBL, arr-3, aac(6')-Ib4, sul1, dfrA19, blaCARB-2, sul1	No
NZ_CP092084.1	A. bereziniae	unnamed	No Rep	-	No rep	43270	GD03255	SAMN17007569	Asia	China	Sputum	Clinical	2015	Multiple	tet39, blaCARB-2, sul1, msr(E), mph(E)	No
NC_020818.1	A. baumannii	pNDM-AB	No Rep	-	NDM	47098	GF216	SAMN14225924	Asia	China	Pig lung	Animal	2011-2012	Multiple	aph(3')-VI, blaNDM-1, ble-MBL, msr(E), mph(E)	No
NZ_CP016902.1	A. soli	pGFJ6	No Rep	-	No rep	4066	GFJ2	SAMN05554081	Asia	Thailand	Soil	Environment	2011	None	-	No
NZ_CP071768.1	A. towneri	pGX3-2	No Rep	-	No rep	54135	GX3	SAMN16439931	Asia	China	Pig faeces	Animal	2019	Macrolide	msr(E), mph(E)	No
NZ_CP072550.1	A. lwoffii	pH7-250	No Rep	-	p2014S07	250175	H7	SAMN18558474	Asia	China	Chicken	Animal	2016	Multiple	aphA6, sul1, blaPER-1, sul1, aac(6')-Ib4, arr-3, floR, msr(E), mph(E)	No
NZ_MF078634.1	A. pittii	pLS488	No Rep	-	No rep	51291	HGSA488	SAMN14227752	South America	Portugal	Drainage fluid	Clincial	2012	Carbapenem	blaOXA-23	No
NZ_CM012182.1	A. bereziniae	pAbe229-1	No Rep	-	No rep	1329	HPC229	SAMN04115377	South America	Argentina	Blood	Clinical	2014	None	-	No
NZ_CM012185.1	A. bereziniae	pAbe229-4	No Rep	-	No rep	4450	HPC229	SAMN04115377	South America	Argentina	Blood	Clinical	2014	None	-	No
NZ_CM012324.1	A. bereziniae	pNDM229	No Rep	-	NDM	44560	HPC229	SAMN04115377	South America	Argentina	Blood	Clinical	2014	Multiple	aph(3')-VI, blaNDM-1, ble-MBL	No
NZ_CP044020.1	A. indicus	pAI02	No Rep	-	No rep	43442	HY20	SAMN11960537	Asia	China	Duck faeces	Animal	2018	None	-	No
NZ_CP044466.1	A. schindleri	pHZE23-1-3	No Rep	-	No rep	13172	HZE23-1	SAMN12478518	Asia	China	Goose faeces	Animal	2018	Sulphonamide	sul2	No
NZ_CP044470.1	A. schindleri	pHZE23-1-7	No Rep	-	pALWEK1.15	6823	HZE23-1	SAMN12478518	Asia	China	Goose faeces	Animal	2018	None	-	No
NZ_CP044472.1	A. schindleri	pHZE23-1-9	No Rep	-	pALWEK1.15	5770	HZE23-1	SAMN12478518	Asia	China	Goose faeces	Animal	2018	None	-	No
NZ_CP044486.1	A. schindleri	pHZE30-1-3	No Rep	-	No rep	18373	HZE30-1	SAMN12478519	Asia	China	Goose faeces	Animal	2018	None	-	No
NZ_CP044478.1	A. schindleri	pHZE33-1-4	No Rep	-	No rep	8743	HZE33-1	SAMN12478520	Asia	China	Goose faeces	Animal	2018	Other	floR	No
NZ_CP044482.1	A. schindleri	pHZE33-1-8	No Rep	-	No rep	5330	HZE33-1	SAMN12478520	Asia	China	Goose faeces	Animal	2018	None	-	No
NZ_CP022300.1	A. johnsonii	pIC001B	No Rep	-	No rep	22605	IC001	SAMN07298690	Asia	Japan	River	Environment	2003	None	-	No
NZ_MK053934.1	A. nosocomialis	pIEC38057	No Rep	-	NDM	41085	IEC38057	SAMN14227957	South America	Brazil	Blood	Clinical	2016	Multiple	ble-MBL, blaNDM-1, aph(3')-VI	No
NZ_KY888886.1	A. pittii	pAP24944-OXA-58	No Rep	-	No rep	53802	IHIT24944	SAMN14227818	Europe	Germany	Dog nose	Animal	2014	Multiple including carbapenem	aacC2d, tet39, blaOXA-58, strA, strB, sul2	No
NC_025000.1	A. lwoffii	pNDM-Iz4b	No Rep	-	NDM	46570	Iz4b	SAMN14226826	Asia	China	Cat rectal swab	Animal	2012	Multiple	aph(3')-VI, blaNDM-1, ble-MBL	No
NZ_CP042996.1	A. nosocomialis	unnamed2	No Rep	-	No rep	5833	J1A	SAMN12418644	Unknown	nr	Seawater	Environment	2016	None	-	No
NZ_CP104735.1	A. baylyi	pJAT2044	No Rep	-	No rep	5117	JAT2044	SAMN30864159	Asia	China	Pig	Animal	2022	Tetracycline	tet(X)	No
NZ_CP104737.1	A. baylyi	pJAT2091	No Rep	-	No rep	27995	JAT2091	SAMN30864160	Asia	China	Pig	Animal	2022	Multiple	sul2, tet(X)	No
NZ_KM210088.1	Acinetobacter sp.	pNDM-JN02	No Rep	-	NDM	41084	JN247	SAMN14226448	Asia	China	Faeces	Clinical	2011	Multiple	aph(3')-VI, blaNDM-1, ble-MBL	No
NZ_KM210086.1	A. lwoffii	pNDM-JN01	No Rep	-	NDM	41084	JN49-1	SAMN14226449	Asia	China	Faeces	Clinical	2011	Multiple	aph(3')-VI, blaNDM-14, ble-MBL	No
NZ_CP096124.1	A. faecalis	pJNE5-3k	No Rep	-	No rep	3617	JNE5	SAMN27668265	Asia	China	Milking environment	Environment	2021	None	-	No
NZ_CP096125.1	A. faecalis	pJNE5-1k	No Rep	-	No rep	1416	JNE5	SAMN27668265	Asia	China	Milking environment	Environment	2021	None	-	No
NZ_KM923969.1	A. lactucae	pNDM-JVAP01	No Rep	-	NDM	47268	JVAP01	SAMN04038486	Middle East	Turkey	Urine	Clinical	2008-2009	Multiple	aph(3')-VI, blaNDM-1, ble-MBL	No
NZ_CP054138.1	A. pittii	pHNJXA13-1	No Rep	-	p2014S07	206931	JXA13	SAMN15055972	Asia	China	Dog faeces	Animal	2019	Multiple	tet(X), sul2, ble-MBL, blaNDM-1, aphA6, aacC2d, tet39, msr(E), mph(E)	No
NZ_CP087332.1	A. baumannii	p1LMG994	No Rep	-	297-3	148957	LMG994	SAMN23078452	Europe	Germany	Human	Clinical	nr	Sulphonamide	sul2	No
NZ_LN873255.1	A. johnsonii	pAJOLS1.1	No Rep	-	No rep	4136	LS47-1	SAMN14229138	Europe	Russia	Riverwater	Environment	1986	Aminoglycoside	aadA27	No
NC_025170.1	Acinetobacter sp.	pM131-7	No Rep	-	No rep	6977	M131	SAMN14226309	Unknown	nr	nr	Unknown	nr	None	-	No
NC_025117.1	Acinetobacter sp.	pM131-11	No Rep	-	No rep	1735	M131	SAMN14226313	Unknown	nr	nr	Unknown	nr	None	-	No
NC_025116.1	Acinetobacter sp.	pM131_NDM1	No Rep	-	NDM	47271	M131	SAMN14226316	Unknown	nr	nr	Unknown	nr	Multiple	aph(3')-VI, blaNDM-1, ble-MBL	No
NZ_CP037425.1	A. johnsonii	pFM-M19	No Rep	-	No rep	55044	M19	SAMN11047491	Asia	China	Hospital sewage	Waste water	2018	Carbapenem	blaOXA-23	No
NZ_MK944317.1	A. lwoffii	pAVAci144	No Rep	-	pALWEK1.15	4677	M2a	-	Europe	Romania	Honey	Environment	2014	None	-	No
NZ_MK944319.1	A. lwoffii	pAVAci130	No Rep	-	No rep	6886	M2a	-	Europe	Romania	Honey	Environment	2014	None	-	No
NZ_CP079750.1	A. bouvetii	pMRB	No Rep	-	NDM	41087	MR1	SAMN20179280	Asia	China	Water	Environment	2019	Multiple	aph(3')-VI, blaNDM-1, ble-MBL	No
NZ_AP019747.1	A. radioresistens	pARA7	No Rep	-	No rep	5208	NBRC 102413	SAMD00041796	Unknown	nr	nr	Unknown	nr	None	-	No
NZ_CP055282.1	Acinetobacter sp.	pBspH14	No Rep	-	No rep	5594	NEB 394	SAMN15195663	North America	USA	Soil	Environment	1986	None	-	No
NZ_CP051210.1	Acinetobacter sp.	pMsp65	No Rep	-	No rep	63543	NEB149	SAMN14567701	Unknown	nr	nr	Unknown	nr	None	-	No
NC_013277.1	A. baumannii	pMMA2	No Rep	-	No rep	10679	nr	SAMN14225395	Europe	Spain	nr	Unknown	nr	Carbapenem	blaOXA-24	No
NZ_KJ003839.1	A. pittii	pNDM-AP	No Rep	-	NDM	39364	nr	SAMN14226755	Asia	China	Blood	Clinical	nr	Multiple	aph(3')-VI, blaNDM-1, ble-MBL	No
NZ_CP087313.1	A. baumannii	p1OC059	No Rep	-	297-3	223334	OC059	SAMN23078459	Europe	Germany	Human	Clinical	nr	Multiple	sul2, tet(B), strA, strB	No
NZ_CP087316.1	A. baumannii	p4OC059	No Rep	-	pRAY	6078	OC059	SAMN23078459	Europe	Germany	Human	Clinical	nr	Aminoglycoside	aadB	No
NZ_CP087301.1	A. baumannii	p1OC061	No Rep	-	NDM	47260	OC061	SAMN23078462	Europe	Germany	Human	Clinical	nr	Multiple	aph(3')-VI, sul1, aadB, blaGIM-1	No
NZ_CP087303.1	A. baumannii	p3OC061	No Rep	-	pALWEK1.15	4677	OC061	SAMN23078462	Europe	Germany	Human	Clinical	nr	None	-	No
AP025537.1	A. baumannii	pOCUAc20-2	No Rep	-	No rep	39267	OCU-Ac20	SAMD00414017	Asia	Japan	Pharyngeal secretions	Clinical	2016	Multiple including carbapenem	blaOXA-23, sul2, blaOXA-169	No
NZ_CP048682.1	A. indicus	pQ186-3-1	No Rep	-	No rep	18507	Q186-3_T	SAMN13979603	Asia	China	Migratory bird faeces	Animal	2018	Macrolide	msr(E), mph(E)	No
NZ_CP048683.1	A. indicus	pQ186-3-2	No Rep	-	No rep	13956	Q186-3_T	SAMN13979603	Asia	China	Migratory bird faeces	Animal	2018	Macrolide	msr(E)	No
NZ_CP048684.1	A. indicus	pQ186-3-3	No Rep	-	pALWEK1.15	4000	Q186-3_T	SAMN13979603	Asia	China	Migratory bird faeces	Animal	2018	None	-	No
NZ_JADDYQ010000116.1	A. johnsonii	unnamed2	No Rep	-	No rep	2267	RB2-047	SAMN16402263	Europe	Slovakia	Gold mine Soil	Environment	2017	None	-	No
NZ_CP110463.1	A. baumannii	pRBH2-1	No Rep	-	pRAY	6078	RBH2	SAMN31494247	Pacific	Australia	Human	Clinical	1999	Aminoglycoside	aadB	No
NZ_CP110465.1	A. baumannii	pRBH2-3	No Rep	-	No rep	75126	RBH2	SAMN31494247	Pacific	Australia	Human	Clinical	1999	None	-	No
NZ_CP110468.1	A. baumannii	pRBH2-6	No Rep	-	297-3	141033	RBH2	SAMN31494247	Pacific	Australia	Human	Clinical	1999	Multiple including carbapenem	blaOXA-23, sul2, tet(B), strA, strB	No
NZ_CP089052.1	A. ursingii	pRIVM_C010559_1	No Rep	-	p2014S07	313387	RIVM_C010559	SAMN23563197	Europe	Netherlands	Human	Clinical	2015	Multiple including carbapenem	aphA6, blaCARB-2, sul1, dfrA19, blaIMP-4, aac(6')-Ib4, catB3, sul1, arr-3, aac(6')-Ib4, sul1, aphA6, msr(E), mph(E), blaOXA-58, aacC2d	No
NZ_CP089045.1	A. ursingii	pRIVM_C010761_1	No Rep	-	p2014S07	258901	RIVM_C010761	SAMN23563198	Europe	Netherlands	Human	Clinical	2016	Multiple including carbapenem	blaOXA-58, aacC2d, msr(E), mph(E), sul1, catB3, aac(6;)-Ib4, blaIMP-4, dfrA19, sul1, blaCARB-2, apha7	No
NZ_CP089047.1	A. ursingii	pRIVM_C010761_3	No Rep	-	No rep	100296	RIVM_C010761	SAMN23563198	Europe	Netherlands	Human	Clinical	2016	None	-	No
NZ_CP089039.1	A. ursingii	pRIVM_C011601_1	No Rep	-	p2014S07	317317	RIVM_C011601	SAMN23563199	Europe	Netherlands	Human	Clinical	2016	Multiple including carbapenem	apha7, blaCARB-2, sul1, dfrA19, blaIMP-4, aac(6')-Ib4, catB3, sul1, arr-3, aac(6')-Ib4, sul1, msr(E), mph(E), aacC2d, blaOXA-58	No
NZ_CP089043.1	A. ursingii	pRIVM_C011601_5	No Rep	-	No rep	1691	RIVM_C011601	SAMN23563199	Europe	Netherlands	Human	Clinical	2016	None	-	No
NZ_MH220285.1	A. ursingii	pRIVM0002_IMP-4_171109_B03	No Rep	-	p2014S07	317191	RIVM0002	SAMN08708147	Europe	Netherlands	Human	Clinical	2016	Multiple	sul1, aac(6')-Ib4, arr-3, sul1, catB3, aac(6')-Ib4, blaIMP-4, dfrA19, sul1, blaCARB-2, apha7, blaOXA-58, aacC2d, msr(E), mph(E)	No
NZ_MH220286.1	A. ursingii	pRIVM0051_IMP-4	No Rep	-	p2014S07	259278	RIVM0051	SAMN08708148	Europe	Netherlands	Human	Clinical	2015	Multiple including carbapenem	sul1, catB3, aac(6')-Ib4, blaIMP-4, dfrA19, sul1, blaCARB-2, apha7, blaOXA-58, aacC2d, msr(E), mph(E)	No
NZ_MH220287.1	A. ursingii	pRIVM0061_IMP-4_171109_B01	No Rep	-	p2014S07	313407	RIVM0061	SAMN08708149	Europe	Netherlands	Human	Clinical	2015	Multiple including carbapenem	aphA6, sul1, aac(6')-Ib4, arr-3, sul1, catB3, aac(6')-Ib4, blaIMP-4, dfrA19, sul1, blaCARB-2, apha7, aacC2d, blaOXA-58, msr(E), mph(E)	No
NZ_CP090385.1	A. towneri	p1_SCLZS30	No Rep	-	No rep	64918	SCLZS30	SAMN24582573	Asia	China	Sewage wastewater	Waste water	2019	Other	cmlB1	No
NZ_CP090070.1	Acinetobacter sp.	pYUSHP14-3	No Rep	-	No rep	9848	SH20PTE14	SAMN24291981	Asia	China	Pig faeces	Animal	2020	None	-	No
NZ_CP090072.1	Acinetobacter sp.	pYUSHP14-5	No Rep	-	No rep	3939	SH20PTE14	SAMN24291981	Asia	China	Pig faeces	Animal	2020	None	-	No
NZ_LC483156.1	A. pittii	pSU1805NDM	No Rep	-	NDM	41022	SU1805	-	Asia	Japan	Hopital environment	Waste water	nr	Multiple	ble-MBL, blaNDM-1, aph(3')-VI	No
NZ_LC537594.1	A. lwoffii	pSU1904NDM	No Rep	-	NDM	43651	SU1904	-	Asia	Japan	Bile	Clinical	2019	Multiple	ble-MBL, blaNDM-1, aph(3')-VI	No
NC_000923.1	Acinetobacter sp.	pRAY	No Rep	-	pRAY	6076	SUN	SAMN14224645	Unknown	nr	nr	Clinical	nr	Aminoglycoside	aadB	No
NZ_JAPHLB020000025.1	A. baumannii	pT190_11	No Rep	-	No rep	2024	T190	SAMN25160020	North America	USA	Draining-Matting Conveyor	Environment	2019	None	-	No
NZ_JAPHLB020000026.1	A. baumannii	pT190_12	No Rep	-	No rep	1691	T190	SAMN25160020	North America	USA	Draining-Matting Conveyor	Environment	2019	None	-	No
NZ_CP095411.1	A. pittii	pTCM-4	No Rep	-	pRAY	6078	TCM	SAMN27485236	Asia	China	Blood	Clincial	2018	Aminoglycoside	aadB	No
NZ_CP045130.1	A. indicus	p4TQ-NDM	No Rep	-	NDM	41086	TQ04	SAMN13016715	Asia	China	Cow faeces	Animal	2017	Multiple	ble-MBL, blaNDM-1, aph(3')-VI	No
NZ_CP045133.1	A. indicus	p18TQ-NDM	No Rep	-	NDM	40439	TQ18	SAMN13017013	Asia	China	Cow faeces	Animal	2017	Multiple	ble-MBL, blaNDM-1, aph(3')-VI	No
NZ_CP045196.1	A. indicus	p23TQ-37k	No Rep	-	No rep	37790	TQ23	SAMN13016821	Asia	China	Cow faeces	Animal	2017	None	-	No
NZ_CP045197.1	A. indicus	p23TQ-NDM	No Rep	-	NDM	41393	TQ23	SAMN13016821	Asia	China	Cow faeces	Animal	2017	Multiple	ble-MBL, blaNDM-1, aph(3')-VI	No
NZ_MDHV02000003.1	A. pittii	pGIM1_UKK-0265	No Rep	-	NDM	39562	UKK-0265	SAMN05022856	Europe	Germany	Human	Clinical	2012	Multiple	aph(3')-VI, sul1, aadB, blaGIM-1	No
NZ_MDHX02000003.1	A. pittii	pNDM1_UKK-0432	No Rep	-	NDM	48580	UKK-0432	SAMN05022858	Europe	Belgium	Human	Clinical	2013	Multiple	aph(3')-VI, blaNDM-1, ble-MBL	No
NZ_MDIB02000003.1	A. pittii	pNDM1_UKK-0538	No Rep	-	NDM	47278	UKK-0538	SAMN05022861	Europe	Germany	Human	Clinical	2011	Multiple	aph(3')-VI, blaNDM-1, ble-MBL	No
NZ_MDIB02000004.1	A. pittii	p4_UKK-0538	No Rep	-	No rep	8804	UKK-0538	SAMN05022861	Europe	Germany	Human	Clinical	2011	Multiple	apha7	No
NZ_MDIC02000004.1	A. pittii	pNDM1_UKK-0539	No Rep	-	NDM	49842	UKK-0539	SAMN05022862	Europe	Germany	Human	Clinical	2013	Multiple	ble-MBL, blaNDM-1, aph(3')-VI	No
NZ_MDID02000002.1	A. pittii	pNDM1_UKK-0540	No Rep	-	NDM	46164	UKK-0540	SAMN05022863	Europe	Germany	Human	Clinical	2014	Multiple	ble-MBL, blaNDM-1, aph(3')-VI	No
NZ_MDIK02000003.1	A. pittii	pVIM2_UKK-0547	No Rep	-	NDM	46530	UKK-0547	SAMN05022870	Europe	Germany	Human	Clinical	2012	Multiple	blaVIM-2, aac(6')-Ib4, sul1, aph(3')-VI	No
NZ_MDIK02000005.1	A. pittii	p5_UKK-0547	No Rep	-	No rep	8804	UKK-0547	SAMN05022870	Europe	Germany	Human	Clinical	2012	Aminoglycoside	apha7	No
NZ_MDIK02000007.1	A. pittii	p7_UKK-0547	No Rep	-	pRAY	6078	UKK-0547	SAMN05022870	Europe	Germany	Human	Clinical	2012	Aminoglycoside	aadB	No
NZ_MDIM02000003.1	A. pittii	pVIM2_UKK-0548	No Rep	-	NDM	45234	UKK-0548	SAMN05022871	Europe	Germany	Human	Clinical	2013	Multiple	aph(3')-VI, sul1, aac(6')-Ib4, blaVIM-2	No
NZ_MDIM02000007.1	A. pittii	p7_UKK-0548	No Rep	-	No rep	8804	UKK-0548	SAMN05022871	Europe	Germany	Human	Clinical	2013	Aminoglycoside	apha7	No
NZ_MDIR02000003.1	A. pittii	pGIM1_UKK-0553	No Rep	-	NDM	43536	UKK-0553	SAMN05022876	Europe	Germany	Human	Clinical	2011	Multiple	aph(3')-VI, sul1, aadB, blaGIM-1	No
NZ_MDIS02000003.1	A. pittii	pGIM1_UKK-0554	No Rep	-	NDM	42583	UKK-0554	SAMN05022877	Europe	Germany	Human	Clinical	2011	Multiple	aph(3')-VI, sul1, aadB, blaGIM-1	No
NZ_MDIT02000009.1	A. pittii	pGIM1_UKK-0555	No Rep	-	NDM	42583	UKK-0555	SAMN05022878	Europe	Germany	Human	Clinical	2011	Multiple	sul1, aadB, blaGIM-1, aph(3')-VI	No
NZ_MDIU02000005.1	A. pittii	pGIM1_UKK-0556	No Rep	-	NDM	43772	UKK-0556	SAMN05022879	Europe	Germany	Human	Clinical	2010	Multiple	aph(3')-VI, sul1, aadB, blaGIM-1	No
NZ_CP080581.1	A. lwoffii	pALWVS1.5	No Rep	-	pALWEK1.15	4677	VS15	SAMN05251106	Asia	Siberia	Permafrost	Environment	nr	None	-	No
NZ_CP029393.2	A. defluvii	p5_010030	No Rep	-	No rep	4700	WCHA30	SAMN05356262	Asia	China	Sewage	Waste water	2015	None	-	No
NZ_CP029395.2	A. defluvii	p7_010030	No Rep	-	No rep	1381	WCHA30	SAMN05356262	Asia	China	Sewage	Waste water	2015	None	-	No
NZ_CP029396.2	A. defluvii	pOXA58_010030	No Rep	-	p2014S07	355358	WCHA30	SAMN05356262	Asia	China	Sewage	Waste water	2015	Multiple including carbapenem	aphA6, sul1, aac(6')-Ib4, arr-3, sul2, blaMCA, blaOXA-58, msr(E), mph(E), cmlB1	No
NZ_CP028559.1	Acinetobacter sp.	p4_010045	No Rep	-	No rep	4344	WCHA45	SAMN07138955	Asia	China	Sewage	Waste water	2015	None	-	No
NZ_CP032285.1	Acinetobacter sp.	pOXA58_010055	No Rep	-	p2014S07	372328	WCHA55	SAMN07138953	Asia	China	Sewage	Waste water	2015	Multiple including carbapenem	arr-3, aac(6')-Ib4, sul1, blaPER-1, sul1, aphA6, cmlB1, msr(E), mph(E), blaOXA-58	No
NZ_CP031709.1	A. wuhouensis	p1_010060	No Rep	-	NDM	38671	WCHA60	SAMN05356836	Asia	China	Hospital sewage	Waste water	2015	None	-	No
NZ_CP031713.1	A. wuhouensis	p5_010060	No Rep	-	No rep	5424	WCHA60	SAMN05356836	Asia	China	Hospital sewage	Waste water	2015	None	-	No
NZ_CP032129.1	A. chinensis	p3_010005	No Rep	-	No rep	4353	WCHAc010005	SAMN07138949	Asia	China	Sewage	Waste water	2015	None	-	No
NZ_CP032130.1	A. chinensis	p4_010005	No Rep	-	No rep	1398	WCHAc010005	SAMN07138949	Asia	China	Sewage	Waste water	2015	None	-	No
NZ_CP032131.1	A. chinensis	p5_010005	No Rep	-	No rep	1243	WCHAc010005	SAMN07138949	Asia	China	Sewage	Waste water	2015	None	-	No
NZ_CP032132.1	A. chinensis	pNDM1_010005	No Rep	-	NDM	39357	WCHAc010005	SAMN07138949	Asia	China	Sewage	Waste water	2015	Multiple	aph(3')-VI, blaNDM-1, ble-MBL	No
NZ_CP032133.1	A. chinensis	pOXA58_010005	No Rep	-	No rep	66715	WCHAc010005	SAMN07138949	Asia	China	Sewage	Waste water	2015	Multiple including carbapenem	aphA6, blaOXA-58, cmlB1, aacC2d	No
NZ_CP032278.1	Acinetobacter sp.	pNDM1_010034	No Rep	-	NDM	49649	WCHAc010034	SAMN05356835	Asia	China	Hospital sewage	Waste water	2015	Multiple	aph(3')-VI, blaNDM-1, ble-MBL	No
NZ_CP032141.1	Acinetobacter sp.	p4_010052	No Rep	-	No rep	4700	WCHAc010052	SAMN07138952	Asia	China	Sewage	Waste water	2015	None	-	No
NZ_CP032142.1	Acinetobacter sp.	pNDM1_010052	No Rep	-	NDM	39365	WCHAc010052	SAMN07138952	Asia	China	Sewage	Waste water	2015	Multiple	ble-MBL, blaNDM-1, aph(3')-VI	No
NZ_CP035935.1	A. cumulans	pNDM1_060092	No Rep	-	NDM	48560	WCHAc060092	SAMN08772519	Asia	China	Sewage	Waste water	2018	Multiple	aph(3')-VI, blaNDM-1, ble-MBL	No
NZ_CP035936.1	A. cumulans	p1_060092	No Rep	-	No rep	177151	WCHAc060092	SAMN08772519	Asia	China	Sewage	Waste water	2018	None	-	No
NZ_CP035938.1	A. cumulans	p3_060092	No Rep	-	No rep	12247	WCHAc060092	SAMN08772519	Asia	China	Sewage	Waste water	2018	None	-	No
NZ_CP033123.1	A. wuhouensis	p3_010062	No Rep	-	No rep	16135	WCHAW010062	SAMN07138954	Asia	China	Sewage	Waste water	2015	None	-	No
NZ_CP033128.1	A. wuhouensis	p8_010062	No Rep	-	No rep	5594	WCHAW010062	SAMN07138954	Asia	China	Sewage	Waste water	2015	None	-	No
NZ_CP033129.1	A. wuhouensis	p9_010062	No Rep	-	No rep	4890	WCHAW010062	SAMN07138954	Asia	China	Sewage	Waste water	2015	None	-	No
NZ_CP033131.1	A. wuhouensis	pOXA58_010062	No Rep	-	No rep	59191	WCHAW010062	SAMN07138954	Asia	China	Sewage	Waste water	2015	Multiple including carbapenem	blaOXA-58, strA, strB, sul2, catB3, aadB, aadA22, sul1, blaPER-1	No
NC_019268.1	A. lwoffii	pNDM-BJ01	No Rep	-	NDM	47274	WJ10621	SAMN14226148	Asia	China	Urine	Clinical	2010	Multiple	aph(3')-VI, blaNDM-1, ble-MBL	No
NC_019281.1	A. lwoffii	pNDM-BJ02	No Rep	-	NDM	46165	WJ10659	SAMN14226141	Asia	China	Urine	Clinical	2010	Multiple	aph(3')-VI, blaNDM-1, ble-MBL	No
NZ_CP116388.1	A. baumannii	pWM98-2	No Rep	-	297-3	169443	WM98	SAMN32770956	Pacific	Australia	Wound	Clinical	1998	None	-	No
NZ_MT742183.1	A. nosocomialis	pWM98B	No Rep	-	p2014S07	255232	WM98B	-	Pacific	Australia	Sputum	Clinical	1998	Multiple	aph(3')-VI, aacC2d, floR	No
NZ_CP018910.1	A. pittii	unnamed1	No Rep	-	No rep	9501	XJ88	SAMN06187701	Asia	China	Sputum	Clinical	2013	Carbapenem	blaOXA-72	No
NZ_CM001802.1	A. pittii	pXM1	No Rep	-	NDM	47274	XM1570	SAMN02469349	Asia	China	Sputum	Clinical	2010	Multiple	aph(3')-VI, blaNDM-1, ble-MBL	No
NZ_CP084303.1	A. pseudolwoffii	pXMC5X702-13k	No Rep	-	No rep	13484	XMC5X702	SAMN20477963	Asia	China	Chicken faeces	Animal	2020	None	-	No
NZ_CP084307.1	A. pseudolwoffii	pXMC5X702-6k	No Rep	-	pRAY	6077	XMC5X702	SAMN20477963	Asia	China	Chicken faeces	Animal	2020	Aminoglycoside	aadB	No
NZ_CP070868.1	A. johnsonii	plas2	No Rep	-	No rep	6689	XY27	SAMN17981369	Asia	China	Bigeye tuna	Animal	2018	None	-	No
NZ_CP070869.1	A. johnsonii	plas3	No Rep	-	No rep	6400	XY27	SAMN17981369	Asia	China	Bigeye tuna	Animal	2018	None	-	No
NZ_CP094560.1	Acinetobacter sp.	pYH12068-5	No Rep	-	No rep	8735	YH12068_T	SAMN26993015	Asia	China	Pig faeces	Animal	2017	Other	floR	No
NZ_CP048673.1	Acinetobacter sp.	pYH12138-3	No Rep	-	No rep	43289	YH12138_T	SAMN13979602	Asia	China	Pig faeces	Animal	2017	None	-	No
NZ_CP048678.1	Acinetobacter sp.	pYH12138-8	No Rep	-	No rep	6030	YH12138_T	SAMN13979602	Asia	China	Pig faeces	Animal	2017	None	-	No
NZ_CP048680.1	Acinetobacter sp.	pYH12138-10	No Rep	-	No rep	5330	YH12138_T	SAMN13979602	Asia	China	Pig faeces	Animal	2017	None	-	No
NZ_CP048666.1	A. piscicola	pYH12207-7	No Rep	-	No rep	8939	YH12207_T	SAMN13979601	Asia	China	Pig faeces	Animal	2017	None	-	No
NZ_CP048669.1	A. piscicola	pYH12207-10	No Rep	-	pRAY	6078	YH12207_T	SAMN13979601	Asia	China	Pig faeces	Animal	2017	Aminoglycoside	aadB	No
NZ_CP094547.1	Acinetobacter sp.	pYH16056-2	No Rep	-	No rep	53792	YH16056_T	SAMN26992904	Asia	China	Soil	Environment	2016	None	-	No
NZ_CP017939.1	A. pittii	unnamed1	No Rep	-	No rep	28641	YMC2010/8/T346	SAMN05827444	Asia	South Korea	Peritoneal catheter tip	Clinical	2010	None	-	No
NZ_CP059559.1	A. junii	pNDM-YR7	No Rep	-	NDM	45911	YR7	SAMN15647988	Asia	China	Faeces	Clinical	2019	Multiple	aph(3')-VI, blaNDM-1, ble-MBL	No
NZ_CP101117.1	Acinetobacter sp.	unnamed2	No Rep	-	No rep	98420	Z1	SAMN29174474	Asia	China	Piggery wastewater	Waste water	2021	None	-	No
NZ_CM009085.2	A. baumannii	p3ZQ9	No Rep	-	pRAY	6078	ZQ9	SAMN08093368	Middle East	Iraq	Blood	Clinical	2016	None	-	No
NZ_CP019147.1	A. lwoffii	pZS-7	No Rep	-	No rep	6886	ZS207	SAMN06191591	Europe	Poland	Microbial mats from gold mine	Enviornment	2012	None	-	No
NZ_CP019148.1	A. lwoffii	pZS-8	No Rep	-	pALWEK1.15	5518	ZS207	SAMN06191591	Europe	Poland	Microbial mats from gold mine	Enviornment	2012	None	-	No
NZ_CP019150.1	A. lwoffii	pZS-11	No Rep	-	pALWEK1.15	4348	ZS207	SAMN06191591	Europe	Poland	Microbial mats from gold mine	Enviornment	2012	None	-	No
NC_019985.2	A. baumannii	pAbNDM-1	No Rep	-	NDM	48368	ZW85-1	-	Asia	China	Diarrheal patient faeces	Clnical	nr	Multiple	aph(3')-VI, blaNDM-1, ble-MBL	No
NZ_LC591943.1	A. variabilis	pRYU24	No Rep	-	No rep	68069	RYU24	SAMD00246909	Asia	Japan	Faeces	Clinical	2012	Multiple including carbapenem	msr(E), mph(E), armA, sul1, blaCARB-2, blaOXA-420, ble-MBL, blaNDM-1, aph(3')-VI	No
AEPA01000395.1	A. baumannii	p1ABST25	No Rep	-	pAba115106	15267	4190	SAMN02471587	Europe	Italy	clinical	Clinical	2009	Carbapenem	blaOXA-72	Yes
AFDA02000006.1	A. baumannii	pNaval18-6.1	No Rep	-	pRAY	6078	Naval-18	SAMN00114927	North America	USA	unknown	Clinical	2006	Aminoglycoside	aadB	Yes
AFDA02000009.1	A. baumannii	pNaval18-131	No Rep	-	297-3	130660	Naval-18	SAMN00114927	North America	USA	unknown	Clinical	2006	Multiple	sul2, strB, strA	Yes
AFDA02000010.1	A. baumannii	pNaval18-5.7	No Rep	-	pALWEK1.15	5676	Naval-18	SAMN00114927	North America	USA	unknown	Clinical	2006	Aminoglycoside	aphA6	Yes
AFDK01000004.1	A. baumannii	pOIFC137-122	No Rep	-	297-3	122461	OIFC137	SAMN02436470	North America	USA	unknown	Unknown	2003	Multiple	strA, strB, sul2	Yes
AFDL01000008.1	A. baumannii	pOIFC143-128	No Rep	-	297-3	127633	OIFC143	SAMN02436631	North America	USA	unknown	Clinical	2003	Multiple	strA, strB, sul2	Yes
ALAL01000013.1	A. baumannii	pOIFC109-122	No Rep	-	297-3	122469	OIFC109	SAMN02436409	North America	USA	unknown	Unknown	2003	Multiple	strA, strB, sul2	Yes
AP014650.1	A. baumannii	pIOMTU433	No Rep	-	297-3	189354	IOMTU433	SAMD00020223	Asia	Nepal	clinical	Clinical	2013	Multiple	mph(E), msr(E), armA, sul1, blaPER-7, sul1, cmlA5, arr-2, sul2, strB, strA	Yes
AP023079.1	A. baumannii	pOCU_Ac16a_2	No Rep	-	NDM	41087	OCU_Ac16a	SAMD00059694	Asia	Japan	tracheal aspirate	Clinical	2015	Multiple	aphA6, blaNDM-1, ble-MBL	Yes
AP024809.1	A. baumannii	pOCUAc18-7	No Rep	-	No rep	4293	OCU_Ac18	SAMD00330123	Asia	Japan	blood	Clinical	2016	None	-	Yes
AP024812.1	A. baumannii	pOCUAc18-10	No Rep	-	No rep	2444	OCU_Ac18	SAMD00330123	Asia	Japan	blood	Clinical	2016	None	-	Yes
CM003315.1	A. baumannii	pMRSN4106-6	No Rep	-	pRAY	6078	MRSN 4106	SAMN02906927	North America	USA	wound	Clinical	2011	Aminoglycoside	aadB	Yes
CM003318.1	A. baumannii	pMRSN3527-6	No Rep	-	pRAY	6068	MRSN 3527	SAMN02906923	North America	USA	wound	Clinical	2011	Aminoglycoside	aadB	Yes
CM003319.1	A. baumannii	pMRSN3942-6	No Rep	-	pRAY	6078	MRSN 3942	SAMN02906926	North America	USA	wound	Clinical	2011	Aminoglycoside	aadB	Yes
CM003320.1	A. baumannii	pMRSN3405-6	No Rep	-	pRAY	6078	MRSN 3405	SAMN02906922	North America	USA	wound	Clinical	2011	Aminoglycoside	aadB	Yes
CM004454.1	A. baumannii	p2M3AC14-8	No Rep	-	pAba115106	18043	M3AC14-8	SAMN03699770	South America	Puerto Rico	skin	Clinical	2014	None	-	Yes
CM008887.2	A. baumannii	p1ZQ1	No Rep	-	No rep	18253	ZQ1	SAMN08043814	Middle East	Iraq	wound swab	Clinical	2016	Multiple	sul1, aadA1, catB, aacA4, mph(E), msr(E), armA	Yes
CM009028.2	A. baumannii	p1ZQ3	No Rep	-	pRAY	6078	ZQ3	SAMN08093362	Middle East	Iraq	blood	Clinical	2016	Aminoglycoside	aadB	Yes
CM009029.2	A. baumannii	p3ZQ3	No Rep	-	pALWEK1.15	5071	ZQ3	SAMN08093362	Middle East	Iraq	blood	Clinical	2016	None	-	Yes
CM009031.2	A. baumannii	p2ZQ10	No Rep	-	pRAY	6078	ZQ10	SAMN08093369	Middle East	Iraq	cerebrospinal fluid	Clinical	2016	None	-	Yes
CM009034.2	A. baumannii	p2ZQ8	No Rep	-	pRAY	6078	ZQ8	SAMN08093367	Middle East	Iraq	blood	Clinical	2016	Aminoglycoside	aadB	Yes
CM009085.3	A. baumannii	p3ZQ9	No Rep	-	pRAY	6133	ZQ9	SAMN08093368	Middle East	Iraq	blood	Clinical	2016	None	-	Yes
CM009648.1	A. baumannii	p3ZQ2	No Rep	-	pRAY	6078	ZQ2	SAMN08093361	Middle East	Iraq	sputum	Clinical	2016	None	-	Yes
CM009652.1	A. baumannii	p4ZQ9	No Rep	-	No rep	11685	ZQ9	SAMN08093368	Middle East	Iraq	blood	Clinical	2016	None	-	Yes
CM018764.1	A. baumannii	pABIQM1	No Rep	-	No rep	44480	ABIQM1	SAMN11872799	Middle East	Iraq	cerebrospinal fluid of patient with meningitis	Clinical	2018	None	-	Yes
CP003848.1	A. baumannii	pBJAB0715	No Rep	-	No rep	52268	BJAB0715	SAMN02604245	Asia	China	cerbrospinal fluid	Clinical	2007-2008	Multiple including carbapenem	aphA6, cmlB1, aacC2d, blaOXA-58	Yes
CP007579.1	A. baumannii	pAC30b	No Rep	-	No rep	16236	AC30	SAMN02471421	Asia	Malaysia	endotracheal secretion	Clinical	2011	Multiple	armA, msr(E), mph(E), aphA1	Yes
CP007714.1	A. baumannii	pABLAC2	No Rep	-	pRAY	6076	LAC-4	SAMN02709859	North America	USA	nosocomial outbreak- site not listed	Clinical	1997	Aminoglycoside	aadB	Yes
CP010399.1	A. baumannii	p6200-47.274kb	No Rep	-	NDM	47274	6200	SAMN03263969	South America	Colombia	bodily fluid	Clinical	2012	Multiple	ble-MBL, aphA6, blaNDM-1	Yes
CP012005.1	A. baumannii	pAB3	No Rep	-	297-3	148955	ATCC 17978-mff	SAMN03817043	North America	Canada	clinical	Clinical	2014	Sulphonamide	sul2	Yes
CP012007.1	A. baumannii	pAB04-1	No Rep	-	297-3	169023	Ab04-mff	SAMN03817045	North America	Canada	blood	Clinical	2012	Multiple	strA, strB, sul2, arr-2, cmlA5, sul1, blaPER-7,sul1, armA, msr(E), mph(E), tet(B), sul2	Yes
CP012953.1	A. baumannii	pD36-1	No Rep	-	No rep	4754	D36	SAMN04029125	Pacific	Australia	wound	Clinical	2008	None	-	Yes
CP012954.1	A. baumannii	pRAY* (pD36-2)	No Rep	-	pRAY	6078	D36	SAMN04029125	Pacific	Australia	wound	Clinical	2008	Aminoglycoside	aadB	Yes
CP018679.1	A. baumannii	pALAC4-2,	No Rep	-	pRAY	6078	LAC4	SAMN05362953	North America	USA	nosocomial outbreak- site not listed	Clinical	1997	Aminoglycoside	aadB	Yes
CP020596.1	A. baumannii	pHWBA8_1	No Rep	-	297-3	195838	HWBA8	SAMN06650239	Asia	South Korea	sputum	Clinical	2013	Multiple	armA, msr(E), mph(E), tet(B), sul2, aac(6')-lan, aacC2e, sul2, arr-2, cmlA5, sul1, blaPER-7, sul1	Yes
CP021343.1	A. baumannii	p2B11911	No Rep	-	No rep	24587	B11911	SAMN03771550	Asia	India	blood	Clinical	2014	None	-	Yes
CP021344.1	A. baumannii	pB11911	No Rep	-	297-3	216780	B11911	SAMN03771550	Asia	India	blood	Clinical	2014	Multiple	strA, strB, sul2, arr-2, cmlA5, sul1, blaPER-7, sul1, armA, msr(E), mph(E)	Yes
CP021346.1	A. baumannii	p1B11911	No Rep	-	pALWEK1.15	3824	B11911	SAMN03771550	Asia	India	blood	Clinical	2014	Aminoglycoside	aphA6	Yes
CP021785.1	A. baumannii	pA85-1b	No Rep	-	No rep	4484	A85	SAMN07125723	Pacific	Australia	sputum	Clinical	2003	None	-	Yes
CP022285.1	A. baumannii	pAba7804b	No Rep	-	297-3	170420	7804	SAMN07289440	North America	Mexico	bronchoalveolar lavage fluid	Clinical	2006	Multiple	sul2, tet(b), strB, strA	Yes
CP026127.1	A. baumannii	pNDM-0285	No Rep	-	NDM	39359	ABNIH28	SAMN06040401	North America	USA	wastewater	Waste water	2016	Multiple	ble-MBL, blaNDM-1, aphA6	Yes
CP026339.1	A. baumannii	pAba810CPb	No Rep	-	pAba115106	16095	810CP	SAMN07559626	North America	Mexico	feces	Clinical	2015	None	-	Yes
CP027181.1	A. baumannii	p1AR_0070	No Rep	-	pRAY	6078	AR_0070	SAMN04014911	North America	USA	clinical	Clinical	nr	Aminoglycoside	aadB	Yes
CP027187.1	A. baumannii	p1AR_0052	No Rep	-	pRAY	6078	AR_0052	SAMN04014893	North America	USA	clinical	Clinical	nr	Aminoglycoside	aadB	Yes
CP027531.1	A. baumannii	p2AR_0088	No Rep	-	297-3	146698	AR_0088	SAMN04014929	North America	USA	clinical	Clinical	nr	Multiple	sul2, tet(b), strB, strA, aacC2e, aac(6')-lan	Yes
CP027532.1	A. baumannii	p1AR_0088	No Rep	-	NDM	41087	AR_0088	SAMN04014929	North America	USA	clinical	Clinical	nr	Multiple	ble-MBL, blaNDM-1, aphA6	Yes
CP027610.1	A. baumannii	pAR_0101	No Rep	-	pAba115106	16095	AR_0101	SAMN04014942	North America	USA	clinical	Clinical	nr	None	-	Yes
CP032218.1	A. baumannii	pAB5	No Rep	-	No rep	28582	UPAB1	SAMN09906510	South America	Argentina	urine	Clinical	2016	None	-	Yes
CP032220.1	A. baumannii	p1UPAB1	No Rep	-	No rep	16743	UPAB1	SAMN09906510	South America	Argentina	urine	Clinical	2016	None	-	Yes
CP032742.1	A. baumannii	pC25	No Rep	-	No rep	28674	C25	SAMN10135127	Asia	China	cerebral-spinal fluid	Clinical	2015	None	-	Yes
CP033770.1	A. baumannii	p1FDAARGOS_533	No Rep	-	pRAY	6078	FDAARGOS_533	SAMN10163228	North America	USA	sputum	Clinical	2016	Aminoglycoside	aadB	Yes
CP034095.1	A. baumannii	pA52-3	No Rep	-	No rep	8420	A52	SAMN10441121	Asia	China	sputum	Clinical	2015	None	-	Yes
CP035932.1	A. baumannii	p2VB31459	No Rep	-	No rep	38962	VB31459	SAMN10170272	Asia	India	blood	Clinical	2017	Multiple including carbapenem	blaOXA-170, sul2	Yes
CP036285.1	A. baumannii	p60155_2	No Rep	-	No rep	102405	TG60155	SAMN10261590	North America	USA	sputum	Clinical	2013	None	-	Yes
CP038502.1	A. baumannii	p2CIAT758	No Rep	-	No rep	47417	CIAT758	SAMN11298775	Asia	India	blood	Clinical	2018	Multiple	blaPER-7, sul1, aphA6	Yes
CP038503.1	A. baumannii	p1CIAT758	No Rep	-	No rep	29128	CIAT758	SAMN11298775	Asia	India	blood	Clinical	2018	None	-	Yes
CP038646.1	A. baumannii	p7ACN21	No Rep	-	No rep	57333	ACN21	SAMN11311113	Asia	India	blood	Clinical	2018	Multiple including carbapenem	mph(E), msr(E), armA, sul1, blaCARB2, blaOXA-420	Yes
CP038647.1	A. baumannii	p6ACN21	No Rep	-	pRAY	9909	ACN21	SAMN11311113	Asia	India	blood	Clinical	2018	Aminoglycoside	aadB	Yes
CP038649.1	A. baumannii	p4ACN21	No Rep	-	pRAY	7396	ACN21	SAMN11311113	Asia	India	blood	Clinical	2018	Aminoglycoside	aadB	Yes
CP038650.1	A. baumannii	p3ACN21	No Rep	-	pRAY	6944	ACN21	SAMN11311113	Asia	India	blood	Clinical	2018	Aminoglycoside	aadB	Yes
CP038651.1	A. baumannii	p2ACN21	No Rep	-	pRAY	5844	ACN21	SAMN11311113	Asia	India	blood	Clinical	2018	Aminoglycoside	aadB	Yes
CP038652.1	A. baumannii	p1ACN21	No Rep	-	pRAY	5734	ACN21	SAMN11311113	Asia	India	blood	Clinical	2018	Aminoglycoside	aadB	Yes
CP039931.1	A. baumannii	pTG29392_1	No Rep	-	No rep	84785	TG29392	SAMN10261537	North America	USA	blood	Clinical	2012	Carbapenem	blaOXA-200	Yes
CP039933.1	A. baumannii	pTG29392_3	No Rep	-	pAba115106	10255	TG29392	SAMN10261537	North America	USA	blood	Clinical	2012	None	-	Yes
CP040044.1	A. baumannii	p2VB958	No Rep	-	No rep	47143	VB958	SAMN11554497	Asia	India	blood	Clinical	2019	None	-	Yes
CP040051.1	A. baumannii	p2VB16141	No Rep	-	297-3	189343	VB16141	SAMN11557458	Asia	India	blood	Clinical	2019	Multiple	strA, strB, sul2, arr-2, cmlA5, sul1, blaPER-7, sul1, armA, msr(E), mph(E)	Yes
CP040052.1	A. baumannii	p1VB16141	No Rep	-	pALWEK1.15	5681	VB16141	SAMN11557458	Asia	India	blood	Clinical	2019	Aminoglycoside	aphA6	Yes
CP040054.1	A. baumannii	p3VB35179	No Rep	-	297-3	236166	VB35179	SAMN11557490	Asia	India	blood	Clinical	2018	Multiple	strA, strB, sul2, arr-2, cmlA5, sul1, blaPER-7, sul1, armA, msr(E), mph(E), tet(B), sul2	Yes
CP040057.1	A. baumannii	p2VB35179	No Rep	-	No rep	46025	VB35179	SAMN11557585	Asia	India	blood	Clinical	2018	Multiple	blaCARB2, sul1, blaPER-7, aphA6	Yes
CP040085.1	A. baumannii	p2VB33071	No Rep	-	No rep	23294	VB33071	SAMN11571816	Asia	India	blood	Clinical	2018	None	-	Yes
CP040260.1	A. baumannii	p3P7774	No Rep	-	297-3	202283	P7774	SAMN11621520	Asia	India	Pus	Clinical	2018	Multiple	sul2, tet(B), mph(E), msr(E), armA, sul1, blaPER-7, sul1, cmlA5, arr-2, sul2, strB, strA, aac(6')-lan	Yes
CP041588.1	A. baumannii	pJ9-1	No Rep	-	pRAY	6078	J9	SAMN12158047	Pacific	Australia	clinical	Clinical	1999	Aminoglycoside	aadB	Yes
CP042206.1	A. baumannii	pTS4568	No Rep	-	pALWEK1.15	4586	DS002	SAMN08637743	Asia	India	soil	Environment	2005	None	-	Yes
CP042209.1	A. baumannii	pTS37365	No Rep	-	No rep	37365	DS002	SAMN08637743	Asia	India	soil	Environment	2005	None	-	Yes
CP042557.1	A. baumannii	pE47_001	No Rep	-	p2014S07	327867	E47	SAMN12289292	Pacific	Australia	Hospital surfaces	Clinical	2013	Multiple including carbapenem	blaOXA-96, mph(E), msr(E), aacC2d, cmlB1, sul1, catB, aacA4, blaIMP-4, dfrA19, sul1, blaCARB2, aphA1	Yes
CP042562.1	A. baumannii	pE47_006	No Rep	-	No rep	5039	E47	SAMN12289292	Pacific	Australia	Hospital surfaces	Clinical	2013	None	-	Yes
CP046899.1	A. baumannii	pA1429c	No Rep	-	297-3	205113	A1429	SAMN13565236	Asia	China	secretion	Clinical	2010	Multiple	blaTEM, aacC2e, aac(6')-lan, strA, strB, tet(B), sul2	Yes
CP048132.1	A. baumannii	pD46-1	No Rep	-	pRAY	6078	D46	SAMN13874778	Pacific	Australia	UTI	Clinical	2010	Aminoglycoside	aadB	Yes
CP048135.1	A. baumannii	pD46-4	No Rep	-	297-3	208004	D46	SAMN13874778	Pacific	Australia	UTI	Clinical	2010	Multiple	tet(B), sul2, mph(E), msr(E), strB, strA	Yes
CP048828.1	A. baumannii	pABF9692	No Rep	-	p2014S07	264805	ABF9692	SAMN14072279	Asia	China	trachea	Clinical	2017	Multiple including carbapenem	tet(M), blaOXA-58, aacC2d, aphA6, ble-MBL, blaNDM-1, floR, sul2, tet(X)	Yes
CP048851.1	A. baumannii	pD4	No Rep	-	297-3	132632	D4	SAMN13874777	Pacific	Australia	wound	Clinical	2006	Multiple	sul2, strA, strB	Yes
CP050386.1	A. baumannii	pVB82_1	No Rep	-	297-3	215278	VB82	SAMN14409516	Asia	India	blood	Clinical	2019	Multiple including carbapenem	aac(6')-lan, blaOXA-23, strA, strB, sul2, sul2, tet(B), mph(E), msr(E), armA, sul1, blaPER-7, sul1, cmlA5, arr-2	Yes
CP050394.1	A. baumannii	pVB11737_3	No Rep	-	No rep	3383	VB11737	SAMN14410107	Asia	India	blood	Clinical	2019	None	-	Yes
CP050395.1	A. baumannii	pVB11737_4	No Rep	-	No rep	2673	VB11737	SAMN14410107	Asia	India	blood	Clinical	2019	None	-	Yes
CP050407.1	A. baumannii	pVB2486_4	No Rep	-	pALWEK1.15	5679	VB2486	SAMN14414761	Asia	India	sputum	Clinical	2019	Aminoglycoside	aphA6	Yes
CP050409.1	A. baumannii	pVB2486_6	No Rep	-	No rep	2457	VB2486	SAMN14414761	Asia	India	sputum	Clinical	2019	None	-	Yes
CP050416.1	A. baumannii	pPM193665_1	No Rep	-	297-3	150385	PM193665	SAMN14420254	Asia	India	Pus	Clinical	2019	Multiple	mph(E), msr(E), armA, sul1, cmlA5, arr-2, sul2, strB, strA, ble-MBL, blaNDM-1, sul2, tet(B)	Yes
CP050417.1	A. baumannii	pPM193665_2	No Rep	-	No rep	52509	PM193665	SAMN14420254	Asia	India	Pus	Clinical	2019	None	-	Yes
CP050423.1	A. baumannii	pVB2200_2	No Rep	-	pALWEK1.15	5679	VB2200	SAMN14415334	Asia	India	sputum	Clinical	2019	Aminoglycoside	aphA6	Yes
CP050426.1	A. baumannii	pPM194122_1	No Rep	-	297-3	150385	PM194188	SAMN14420255	Asia	India	Bronchoalveolar lavage fluid	Clinical	2019	Multiple	mph(E), msr(E), armA, sul1, cmlA5, arr-2, sul2, strB, strA, ble-MBL, blaNDM-1, sul2, tet(B)	Yes
CP050431.1	A. baumannii	pPM194122_6	No Rep	-	No rep	2419	PM194188	SAMN14420255	Asia	India	Bronchoalveolar lavage fluid	Clinical	2019	None	-	Yes
CP050433.1	A. baumannii	pPM194229_1	No Rep	-	297-3	226394	PM194229	SAMN14422682	Asia	India	Bronchoalveolar lavage fluid	Clinical	2019	Multiple	mph(E), msr(E), armA, sul1, blaPER-7, sul1, cmlA5, arr-2, sul2, strA, strB, sul2, tet(B)	Yes
CP050528.1	A. baumannii	pVB2139_2	No Rep	-	pALWEK1.15	5679	VB2139	SAMN14414747	Asia	India	sputum	Clinical	2019	Aminoglycoside	aphA6	Yes
CP050529.1	A. baumannii	pVB2139_3	No Rep	-	No rep	2682	VB2139	SAMN14414747	Asia	India	sputum	Clinical	2019	None	-	Yes
CP051476.1	A. baumannii	pVB2107_2	No Rep	-	No rep	6974	VB2107	SAMN14414778	Asia	India	sputum	Clinical	2019	None	-	Yes
CP051477.1	A. baumannii	pVB2107_3	No Rep	-	No rep	3432	VB2107	SAMN14414778	Asia	India	sputum	Clinical	2019	None	-	Yes
CP051872.1	A. baumannii	pAb-D10a-a_3	No Rep	-	pALWEK1.15	8215	Ab-D10a-a	SAMN14667516	Africa	Ghana	cerebrospinal fluid	Clinical	2016	Carbapenem	blaOXA-23	Yes
CP051873.1	A. baumannii	pAb-D10a-a_4	No Rep	-	No rep	6619	Ab-D10a-a	SAMN14667516	Africa	Ghana	cerebrospinal fluid	Clinical	2016	None	-	Yes
CP051878.1	A. baumannii	pAb-B004d-c_3	No Rep	-	pALWEK1.15	8215	Ab-B004d-c	SAMN14667515	Africa	Ghana	sputum	Clinical	2016	Carbapenem	blaOXA-23	Yes
CP053217.1	A. baumannii	p1DT0544C	No Rep	-	No rep	3968	DT0544C	SAMN14833494	Africa	Tanzania	clinical	Clinical	2017	None	-	Yes
CP059301.1	A. baumannii	pAC1633-1	No Rep	-	No rep	174292	AC1633	SAMN15574350	Asia	Malaysia	blood	Clinical	2016	Multiple including carbapenem	aacC2d, sul2, blaNDM-1, ble-MBL, strA, strB, blaOXA-58, mph(E), msr(E)	Yes
CP059731.1	A. baumannii	pAbCTX13_17kb	No Rep	-	pAba115106	17003	AbCTX13	SAMN15501316	Europe	France	Peritoneal fluid	Clinical	2017	Carbapenem	blaOXA-72	Yes
CP061709.1	A. baumannii	p5E072658	No Rep	-	No rep	15545	E-072658	SAMN15646565	Europe	Finland	paper pulp mill	Environment	2009	None	-	Yes
CP064293.1	A. baumannii	pABAUUSACASD_frag1	No Rep	-	pAba115106	13499	SD	SAMN16574826	North America	USA	clinical	Clinical	2018	None	-	Yes
CP064294.1	A. baumannii	pABAUUSACASD_frag2	No Rep	-	No rep	5822	SD	SAMN16574826	North America	USA	clinical	Clinical	2018	None	-	Yes
CP065394.1	A. baumannii	pAbBAS-1.2	No Rep	-	pRAY	6078	AbBAS-1	SAMN15676490	Europe	Spain	clinical	Clinical	2019	Aminoglycoside	aadB	Yes
CP066234.1	A. baumannii	pG20AB010-2	No Rep	-	No rep	19616	G20AB010	SAMN17073617	Asia	South Korea	blood	Clinical	2020	None	-	Yes
CP066239.1	A. baumannii	pG20AB007-2	No Rep	-	No rep	11508	G20AB007	SAMN17073615	Asia	South Korea	blood	Clinical	2020	None	-	Yes
CP072123.1	A. baumannii	p1KSK1	No Rep	-	297-3	218105	KSK1	SAMN18396008	Asia	India	respiratory specimen	Clinical	2020	Multiple	mph(E), msr(E), armA, sul1, blaPER-7, sul1, cmlA1, arr-3, ant(3'')-la, sul2, strB, strA	Yes
CP072126.1	A. baumannii	p4KSK1	No Rep	-	pALWEK1.15	5679	KSK1	SAMN18396008	Asia	India	respiratory specimen	Clinical	2020	Aminoglycoside	aphA6	Yes
CP072271.1	A. baumannii	p1KSK6	No Rep	-	297-3	218105	KSK6	SAMN18452234	Asia	India	respiratory specimen	Clinical	2020	Multiple	mph(E), msr(E), armA, sul1, blaPER-7, sul1, cmlA1, arr-3, ant(3'')-la, sul2, strB, strA	Yes
CP072274.1	A. baumannii	p4KSK6	No Rep	-	pALWEK1.15	5679	KSK6	SAMN18452234	Asia	India	respiratory specimen	Clinical	2020	Aminoglycoside	aphA6, aphA6	Yes
CP072276.1	A. baumannii	p1KSK7	No Rep	-	297-3	218105	KSK7	SAMN18452334	Asia	India	respiratory specimen	Clinical	2020	Multiple	mph(E), msr(E), armA, sul1, blaPER-7, sul1, cmlA1, arr-3, ant(3'')-la, sul2, strB, strA	Yes
CP072279.1	A. baumannii	p4KSK7	No Rep	-	pALWEK1.15	5679	KSK7	SAMN18452334	Asia	India	respiratory specimen	Clinical	2020	Aminoglycoside	aphA6	Yes
CP072281.1	A. baumannii	p1KSK10	No Rep	-	297-3	218105	KSK10	SAMN18452342	Asia	India	respiratory specimen	Clinical	2020	Multiple	mph(E), msr(E), armA, sul1, blaPER-7, sul1, cmlA1, arr-3, ant(3'')-la, sul2, strB, strA	Yes
CP072284.1	A. baumannii	p4KSK10	No Rep	-	pALWEK1.15	5679	KSK10	SAMN18452342	Asia	India	respiratory specimen	Clinical	2020	Aminoglycoside	aphA6, aphA6	Yes
CP072286.1	A. baumannii	p1KSK11	No Rep	-	297-3	218105	KSK11	SAMN18452659	Asia	India	respiratory specimen	Clinical	2020	Multiple	mph(E), msr(E), armA, sul1, blaPER-7, sul1, cmlA1, arr-3, ant(3'')-la, sul2, strB, strA	Yes
CP072289.1	A. baumannii	p4KSK11	No Rep	-	pALWEK1.15	5679	KSK11	SAMN18452659	Asia	India	respiratory specimen	Clinical	2020	Aminoglycoside	aphA6, aphA6	Yes
CP072291.1	A. baumannii	p1KSK18	No Rep	-	297-3	218105	KSK18	SAMN18452698	Asia	India	respiratory specimen	Clinical	2020	Multiple	mph(E), msr(E), armA, sul1, blaPER-7, sul1, cmlA1, arr-3, ant(3'')-la, sul2, strB, strA	Yes
CP072294.1	A. baumannii	p4KSK18	No Rep	-	pALWEK1.15	5679	KSK18	SAMN18452698	Asia	India	respiratory specimen	Clinical	2020	Aminoglycoside	aphA6	Yes
CP072296.1	A. baumannii	p1KSK19	No Rep	-	297-3	218105	KSK19	SAMN18452699	Asia	India	respiratory specimen	Clinical	2020	Multiple	mph(E), msr(E), armA, sul1, blaPER-7, sul1, cmlA1, arr-3, ant(3'')-la, sul2, strB, strA	Yes
CP072299.1	A. baumannii	p4KSK19	No Rep	-	pALWEK1.15	5679	KSK19	SAMN18452699	Asia	India	respiratory specimen	Clinical	2020	Aminoglycoside	aphA6	Yes
CP072301.1	A. baumannii	p1KSK20	No Rep	-	297-3	218105	KSK20	SAMN18452712	Asia	India	respiratory specimen	Clinical	2020	Multiple	mph(E), msr(E), armA, sul1, blaPER-7, sul1, cmlA1, arr-3, ant(3'')-la, sul2, strB, strA	Yes
CP072304.1	A. baumannii	p4KSK20	No Rep	-	pALWEK1.15	5679	KSK20	SAMN18452712	Asia	India	respiratory specimen	Clinical	2020	Aminoglycoside	aphA6	Yes
CP072399.1	A. baumannii	p1KSK2	No Rep	-	297-3	218105	KSK2	SAMN18451305	Asia	India	respiratory specimen	Clinical	2020	Multiple	mph(E), msr(E), armA, sul1, blaPER-7, sul1, cmlA1, arr-3, ant(3'')-la, sul2, strB, strA	Yes
CP072402.1	A. baumannii	p4KSK2	No Rep	-	pALWEK1.15	5679	KSK2	SAMN18451305	Asia	India	respiratory specimen	Clinical	2020	Aminoglycoside	aphA6	Yes
CP076815.1	A. baumannii	p1UC21460	No Rep	-	No rep	55507	UC21460	SAMN19356533	South America	Chile	tissue	Clinical	2010	None	-	Yes
CP077802.1	A. baumannii	p40288*	No Rep	-	297-3	145711	40288	SAMN19911946	Europe	France	UTI	Clinical	2015	None	-	Yes
CP077844.1	A. baumannii	pDETAB14	No Rep	-	NDM	38952	DETAB-E155	SAMN19762632	Asia	China	Infusion stand	Clinical	2019	None	-	Yes
CP088896.1	A. baumannii	pDETABR21-1	No Rep	-	No rep	12709	DETAB-R21	SAMN23553142	Asia	China	feces	Clinical	2021	None	-	Yes
CP088897.1	A. baumannii	pDETABR21-2	No Rep	-	No rep	4554	DETAB-R21	SAMN23553142	Asia	China	feces	Clinical	2021	None	-	Yes
CP091597.1	A. baumannii	pR32_3	No Rep	-	pRAY	11378	Nord4-2	SAMN25263435	Europe	Germany	unknown	Unknown	2018	None	-	Yes
CP091598.1	A. baumannii	pR32_1	No Rep	-	297-3	117234	Nord4-2	SAMN25263435	Europe	Germany	unknown	Unknown	2018	None	-	Yes
CP092029.1	A. baumannii	pAbCTX5	No Rep	-	pAba115106	15266	AbCTX5	SAMN15501055	Europe	France	catheter	Clinical	2015	Carbapenem	blaOXA-72	Yes
CP092030.1	A. baumannii	pAbCTX9	No Rep	-	pAba115106	15266	AbCTX9	SAMN15501056	Europe	France	brocho-alveolar lavage	Clinical	2017	Carbapenem	blaOXA-72	Yes
CP096718.1	A. baumannii	p5741_1	No Rep	-	No rep	21174	5741	SAMN24114669	Asia	China	sputum	Clinical	2010	Sulphonamide	sul2	Yes
CP098522.1	A. baumannii	pCl107	No Rep	-	297-3	198716	Cl107	SAMN28871714	Middle East	Lebanon	UTI	Clinical	2012	Multiple	sul2, tet(B), strB, strA, aacC2	Yes
CP098794.1	A. baumannii	p3VB280820	No Rep	-	No rep	5452	280820	SAMN28980502	Asia	China	sputum	Clinical	2021	None	-	Yes
CP098797.1	A. baumannii	p2VB280821	No Rep	-	No rep	135066	VB280821	SAMN28981486	Asia	India	blood	Clinical	2020	None	-	Yes
CP098799.1	A. baumannii	p4VB280821	No Rep	-	No rep	5452	VB280821	SAMN28981486	Asia	India	blood	Clinical	2020	None	-	Yes
CP101886.1	A. baumannii	pCCBH31270	No Rep	-	p2014S07	340708	CCBH31270	SAMN29981016	South America	Brazil	tracheal aspirate	Clinical	2021	Multiple including carbapenem	blaNDM-1, aacA4, dfrA1, sul1, blaOXA-58, msr(E), mph(E), floR, aacC2, blaTEM, strB, strA, sul2	Yes
CP101888.1	A. baumannii	pCCBH31258	No Rep	-	p2014S07	340418	CCBH31258	SAMN29977860	South America	Brazil	catheter	Clinical	2021	Multiple including carbapenem	blaNDM-1, aacA4, dfrA1, sul1, blaOXA-164, msr(E), mph(E), floR, aacC2, blaTEM, strB, strA, sul2	Yes
GQ377752.1	A. baumannii	pMMA2	No Rep	-	No rep	10679	-	SAMN14225395	Europe	Spain	unknown	Unknown	nr	Carbapenem	blaOXA-24	Yes
JACGEH010000071.1	A. baumannii	pAbCTX2_15kb	No Rep	-	pAba115106	15266	AbCTX2	SAMN15487671	Europe	France	Abdominal wound	Clinical	2015	Carbapenem	blaOXA-72	Yes
JACGEI010000083.1	A. baumannii	pAbCTX11_15kb	No Rep	-	pAba115106	15343	AbCTX11	SAMN15501049	Europe	France	urine	Clinical	2017	Carbapenem	blaOXA-72	Yes
JACGEK010000080.1	A. baumannii	pAbCTX17_17kb	No Rep	-	pAba115106	17003	AbCTX17	SAMN15501052	Europe	France	Throat sample	Clinical	2019	Carbapenem	blaOXA-897	Yes
JF343536.2	A. baumannii	pRAY*-v1	No Rep	-	pRAY	6078	C2	SAMN14226072	Pacific	Australia	unknown	Unknown	2007	Aminoglycoside	aadB	Yes
JN377410.2	A. baumannii	pAbNDM-1	No Rep	-	NDM	48368	ZW85-1	SAMN02641530	Asia	China	feces	Clinical	nr	Multiple	aphA6, blaNDM-1, ble-MBL	Yes
JX076770.1	A. baumannii	pRAY*-v2	No Rep	-	pRAY	8433	E7	SAMN14226315	Pacific	Australia	blood	Clinical	2008	Aminoglycoside	aadB	Yes
KC503911.1	A. baumannii	pNDM-AB	No Rep	-	NDM	47098	GF216	SAMN14225924	Asia	China	lung	Clinical	nr	Multiple	aphA6, blaNDM-1, mph(E), msr(E)	Yes
KU500415.1	A. baumannii	ABA02	No Rep	-	No rep	12282	JV1	SAMN14227269	Asia	India	unknown	Unknown	nr	Macrolide	msr(E), msr(E), mph(E)	Yes
KU744946.1	A. baumannii	pA297-3	No Rep	-	297-3	200633	A297(RUH875)	SAMN14227240	Europe	Netherlands	urinary tract infection	Clinical	1984	Multiple	sul2, strB, strA	Yes
KU869529.1	A. baumannii	pA297-1 (pRAY*)	No Rep	-	pRAY	6078	A297(RUH875)	SAMN14227233	Europe	Netherlands	unknown	Unknown	1984	Aminoglycoside	aadB	Yes
KX118105.1	A. baumannii	IHIT7853-OXA-23	No Rep	-	No rep	53995	IHIT7853	SAMN14227160	Europe	Germany	urine	Clinical	nr	Multiple including carbapenem	blaOXA-23, strB, strA	Yes
LT605060.1	A. baumannii	pNCTC7364	No Rep	-	297-3	148956	NCTC7364	SAMEA3310339	Europe	United Kingdom	unknown	Environment	2014	Sulphonamide	sul2	Yes
MK053932.1	A. baumannii	Piec383	No Rep	-	NDM	47283	IEC383	SAMN14227958	South America	Brazil	blood	Clinical	2014	None	-	Yes
MK323043.1	A. baumannii	pAb45063_b	No Rep	-	297-3	183767	Acb-45063	SAMN14228621	South America	Brazil	unknown	Unknown	nr	Multiple	sul2, strB, strA	Yes
MK531536.1	A. baumannii	pMC1.1	No Rep	-	297-3	184770	MC1	-	South America	Bolivia	catheter	Clinical	2015	Aminoglycoside	aacC2, aac(6')-lan, strA, strB, tet(B), sul2	Yes
MK531539.1	A. baumannii	pMC23.3	No Rep	-	pRAY	6078	MC23	-	South America	Bolivia	urine	Clinical	2016	Aminoglycoside	aadB	Yes
MK531540.1	A. baumannii	pMC75.1	No Rep	-	297-3	150158	MC75	-	South America	Bolivia	ulcer	Clinical	2016	Multiple	strA, strB, sul2	Yes
MT002974.1	A. baumannii	pAB17	No Rep	-	NDM	41087	AB17	-	South America	Brazil	unknown	Clinical	nr	Multiple	blaNDM-1, aphA6	Yes
