# Supplementary material for: Pan-Genus Analysis and Typing of Antimicrobial Resistance Plasmids in Acinetobacter
Source: Research Square preprint supplement (doi:10.21203/rs.3.rs-6165751/v1), 2025-05-12
Supplement: Supplementary file 3 [file f3b5d470942aec5b78bf631b.xlsx]

## Sheet: R1 SNP Matrix
snp-dists 0.8.2	r1-T20_NZ_CP041367.1_p2_A_tandoii	r1-T2_CP030108.1_pDA33382-2_c7_A_baum	r1-T15_NZ_CP059689.1_FDAARGOS_731_plasmid_unnamed4_A_radioresistens	r1-T17_NZ_CP113449.1_pC9_7_A_baumannii_rep1	r1-T9_NC_025118.1_pM131-9_Acinetobacter_sp	r1-T21_NZ_CP041289.1_p94-2-p5_A_indicus	R1_r1-T8_AP024811_pOCUAc18-9_A_baum	r1-T24_NZ_CP060816.1_pXM9F202-2-2k_A_variabilis	r1-T22_NZ_CP084311.1_pXMC5X702-2.3k_A_pseudolwoffii	r1-T10_NZ_CP103343.1_AB105_plasmid_unnamed6_A_baumannii	r1-T11_NC_025169.1_pM131-10_Acinetobacter_sp	R1_r1-T2_CP088900.1_pDETABR21-5_A_baum	R1_r1-T7_CP088899_pDETABR21-4_A_baum	r1-T18_NZ_CP031987.1_pAhaemAN3a_A_haemolyticus_rep2	r1-T1_CP021783.1_pA85-1_c2_A_baum	r1-T5_JN872565.1_pTS236_c6_A_baum	r1-T25_NZ_CP090073.1_pYUSHP14-6_Acinetobacter_sp	r1-T16_NZ_CP113449.1_pC9_7_A_baumannii_rep2	r1-T2_L77992.1_pAB49_c3_A_baum	r1-T23_NZ_CP104658.1_2021CK-01005_plasmid_unnamed7_A_variabilis	r1-T1_NZ_CP061665.1_pAS28-1_A_seifertii	r1-T14_NZ_CP035943.1_p8_060092_A_cumulans	r1-T12_NZ_CP033121.1_p12_010062_A_wuhouensis	r1-T6__pMRSN56-1__418_A_baum	r1-T2_CM003313.1_pMRSN7339-2.3_c4_A_baum	r1-T13_NZ_CP032007.1_pAhaem11616b_A_haemolyticus	r1-T19_NZ_CP022302.1_pIC001D_A_johnsonii	r1-T2_NZ_CP028572.2_p4_005046_A_pittii	r1-T4_CP008709.1_p3AB5075_c5_A_baum	r1-T26_NZ_CP106991.1_pNY13623-3_A_baumannii	r1-T1_NC_010403.1_p4ABAYE_c0_A_baum	r1-T1_CM003316.1_pMRSN58-2.7_c1_A_baum
r1-T20_NZ_CP041367.1_p2_A_tandoii	0	374	605	617	389	381	620	499	503	418	400	399	644	421	616	543	506	336	397	497	614	567	557	428	397	488	400	394	570	492	615	615
r1-T2_CP030108.1_pDA33382-2_c7_A_baum	374	0	549	563	405	383	548	444	457	447	303	32	571	385	563	495	446	389	1	449	560	510	507	313	4	469	270	11	505	444	566	562
r1-T15_NZ_CP059689.1_FDAARGOS_731_plasmid_unnamed4_A_radioresistens	605	549	0	354	616	591	629	334	319	621	592	603	376	592	344	138	314	565	598	316	344	594	597	609	600	617	599	597	636	308	337	344
r1-T17_NZ_CP113449.1_pC9_7_A_baumannii_rep1	617	563	354	0	622	601	621	347	344	616	602	614	288	614	333	338	331	585	612	340	330	584	584	613	612	623	609	607	605	332	328	331
r1-T9_NC_025118.1_pM131-9_Acinetobacter_sp	389	405	616	622	0	409	650	513	510	433	432	442	645	423	627	553	510	201	439	515	625	606	611	461	437	522	437	439	566	508	625	626
r1-T21_NZ_CP041289.1_p94-2-p5_A_indicus	381	383	591	601	409	0	625	499	494	453	381	412	612	430	606	529	502	365	406	489	604	577	562	402	406	490	368	407	561	502	605	605
R1_r1-T8_AP024811_pOCUAc18-9_A_baum	620	548	629	621	650	625	0	504	516	644	624	603	661	630	657	568	504	610	597	515	656	622	636	632	597	652	627	600	625	487	655	656
r1-T24_NZ_CP060816.1_pXM9F202-2-2k_A_variabilis	499	444	334	347	513	499	504	0	200	535	495	486	358	488	347	343	201	471	491	230	345	519	508	495	494	508	487	490	540	213	335	345
r1-T22_NZ_CP084311.1_pXMC5X702-2.3k_A_pseudolwoffii	503	457	319	344	510	494	516	200	0	544	493	506	348	503	348	322	186	461	507	179	346	508	499	505	508	509	484	506	547	189	344	346
r1-T10_NZ_CP103343.1_AB105_plasmid_unnamed6_A_baumannii	418	447	621	616	433	453	644	535	544	0	461	488	634	441	643	569	533	402	482	529	641	552	563	450	482	487	442	480	555	536	640	642
r1-T11_NC_025169.1_pM131-10_Acinetobacter_sp	400	303	592	602	432	381	624	495	493	461	0	332	620	446	597	531	492	413	321	497	595	562	561	339	321	522	239	320	561	491	600	597
R1_r1-T2_CP088900.1_pDETABR21-5_A_baum	399	32	603	614	442	412	603	486	506	488	332	0	618	441	611	549	498	406	32	499	608	568	564	330	32	508	298	33	559	495	612	610
R1_r1-T7_CP088899_pDETABR21-4_A_baum	644	571	376	288	645	612	661	358	348	634	620	618	0	636	331	344	345	610	619	354	328	620	618	617	620	630	626	617	645	338	333	329
r1-T18_NZ_CP031987.1_pAhaemAN3a_A_haemolyticus_rep2	421	385	592	614	423	430	630	488	503	441	446	441	636	0	621	543	498	358	428	505	621	547	551	429	430	478	422	426	551	498	622	622
r1-T1_CP021783.1_pA85-1_c2_A_baum	616	563	344	333	627	606	657	347	348	643	597	611	331	621	0	332	323	599	607	348	2	622	613	599	607	632	617	603	646	329	30	2
r1-T5_JN872565.1_pTS236_c6_A_baum	543	495	138	338	553	529	568	343	322	569	531	549	344	543	332	0	315	512	544	330	331	555	556	549	546	553	537	544	584	315	327	331
r1-T25_NZ_CP090073.1_pYUSHP14-6_Acinetobacter_sp	506	446	314	331	510	502	504	201	186	533	492	498	345	498	323	315	0	465	496	198	322	510	495	497	498	506	491	495	531	96	317	322
r1-T16_NZ_CP113449.1_pC9_7_A_baumannii_rep2	336	389	565	585	201	365	610	471	461	402	413	406	610	358	599	512	465	0	401	474	597	534	532	419	401	483	416	395	529	464	593	598
r1-T2_L77992.1_pAB49_c3_A_baum	397	1	598	612	439	406	597	491	507	482	321	32	619	428	607	544	496	401	0	500	604	561	558	323	4	513	290	12	557	494	610	606
r1-T23_NZ_CP104658.1_2021CK-01005_plasmid_unnamed7_A_variabilis	497	449	316	340	515	489	515	230	179	529	497	499	354	505	348	330	198	474	500	0	346	519	516	501	501	509	492	500	548	200	343	346
r1-T1_NZ_CP061665.1_pAS28-1_A_seifertii	614	560	344	330	625	604	656	345	346	641	595	608	328	621	2	331	322	597	604	346	0	621	612	597	604	630	615	600	645	328	27	0
r1-T14_NZ_CP035943.1_p8_060092_A_cumulans	567	510	594	584	606	577	622	519	508	552	562	568	620	547	622	555	510	534	561	519	621	0	210	591	559	596	563	555	431	503	621	622
r1-T12_NZ_CP033121.1_p12_010062_A_wuhouensis	557	507	597	584	611	562	636	508	499	563	561	564	618	551	613	556	495	532	558	516	612	210	0	576	558	595	554	555	425	489	609	613
r1-T6__pMRSN56-1__418_A_baum	428	313	609	613	461	402	632	495	505	450	339	330	617	429	599	549	497	419	323	501	597	591	576	0	321	525	340	323	576	498	600	598
r1-T2_CM003313.1_pMRSN7339-2.3_c4_A_baum	397	4	600	612	437	406	597	494	508	482	321	32	620	430	607	546	498	401	4	501	604	559	558	321	0	512	289	12	554	496	610	606
r1-T13_NZ_CP032007.1_pAhaem11616b_A_haemolyticus	488	469	617	623	522	490	652	508	509	487	522	508	630	478	632	553	506	483	513	509	630	596	595	525	512	0	522	517	607	507	635	632
r1-T19_NZ_CP022302.1_pIC001D_A_johnsonii	400	270	599	609	437	368	627	487	484	442	239	298	626	422	617	537	491	416	290	492	615	563	554	340	289	522	0	289	553	482	622	617
r1-T2_NZ_CP028572.2_p4_005046_A_pittii	394	11	597	607	439	407	600	490	506	480	320	33	617	426	603	544	495	395	12	500	600	555	555	323	12	517	289	0	555	492	606	602
r1-T4_CP008709.1_p3AB5075_c5_A_baum	570	505	636	605	566	561	625	540	547	555	561	559	645	551	646	584	531	529	557	548	645	431	425	576	554	607	553	555	0	532	648	646
r1-T26_NZ_CP106991.1_pNY13623-3_A_baumannii	492	444	308	332	508	502	487	213	189	536	491	495	338	498	329	315	96	464	494	200	328	503	489	498	496	507	482	492	532	0	328	328
r1-T1_NC_010403.1_p4ABAYE_c0_A_baum	615	566	337	328	625	605	655	335	344	640	600	612	333	622	30	327	317	593	610	343	27	621	609	600	610	635	622	606	648	328	0	28
r1-T1_CM003316.1_pMRSN58-2.7_c1_A_baum	615	562	344	331	626	605	656	345	346	642	597	610	329	622	2	331	322	598	606	346	0	622	613	598	606	632	617	602	646	328	28	0

## Sheet: R3 SNP Matrix
snp-dists 0.8.2	r3-T80_NZ_CP059685.1_FDAARGOS_731_plasmid_unnamed1_A_radioresistens	r3-T86_NZ_CP045104.1_pAJ4131_A_johnsonii_rep1	r3-T5_CP065434.1_pAB17961-2_c98	r3-T3_CP027182.1_p4AR_0070_c25	r3-T102_NZ_CP024012.1_LoGeW2-3_plasmid_unnamed1_Acinetobacter_sp	r3-T1_NC_010605.1_pACICU1_c38	r3-T179_NC_025119.1_pM131-8_Acinetobacter_sp	r3-T45_CP044520.1_p29FS20-1_c15	r3-T26_NZ_CP104655.1_2021CK-01005_plasmid_unnamed4_A_variabilis	r3-T37_NC_009083.1_pAB1_c36	r3-T2_CP035050.1_p11.8Kbp_c46	r3-T113_NZ_MH999418.1_SWBY1_plasmid_unnamed_Acinetobacter_sp	r3-T34_CP059552.1_p4E-022166_A_seifertii_rep1	r3-T24_AP024806_pOCUAc18-4	r3-T80_NZ_CP119225.1_pAP54-2_A_proteolyticus	r3-T76_NZ_CP059686.1_FDAARGOS_731_plasmid_unnamed2_A_radioresistens	r3-T60_NC_021728.1_p2BJAB07104_A_baumannii	r3-T21_NZ_CP062186.1_AT235_plasmid_unnamed_A_towneri	r3-T2_NZ_CP094559.1_pYH12068-4_Acinetobacter_sp	r3-T13_CP026126.1_pABA-6973_c78	r3-T55_CP059555.1_p1E-022166_A_seifertii	r3-T62_NZ_CP032106.2_pALWEK1.3_A_lwoffii	r3_T3_CP059475.1_pM175-3.1	r3-T3_AP022239.1_pWP8-W18-ESBL-11_1_c21	r3-T28_NZ_CP094644.1_PK01_plasmid_unnamed_Acinetobacter_sp	r3-T85_NZ_CP054906.1_FDAARGOS_724_plasmid_unnamed3	r3-T194_NZ_CP041366.1_p1_A_tandoii	r3-T145_NZ_CP089042.1_pRIVM_C011601_4_A_ursingii	r3-T80_NZ_CP032268.1_p1_010034_Acinetobacter_sp_rep2	r3-T19_CP027179.1_p2AR_0070_c54.2	r3-T24_NZ_CP032006.1_pAhaem11616d_A_haemolyticus	r3-T31_LN865144.1_pCIP70.10_c71	r3-T3_CP046537.1_pXL380_c30	r3-T32_NZ_CP018873.1_pAHTJS2_A_haemolyticus_rep1	r3-T140_NZ_CP055288.1_pBspH6_Acinetobacter_sp	r3-T7_NZ_CP069498.1_FDAARGOS_1217_plasmid_unnamed2_A_pittii	r3-T7_NC_010404.1_p3ABAYE_c2	r3-T33_CP033751.1_p1FDAARGOS_540_c82	r3-T91_NZ_CP028798.2_p1_010059_A_junii	r3-T7_CP033769.1_p2FDAARGOS_533_c4	r3-T142_NZ_CP098733.1_Y-23_plasmid_unnamed_A_tibetensis	r3-T84_NZ_CP113448.1_pC9_6_A_baumannii	r3-T8_NZ_CP045104.1_pAJ4131_A_johnsonii_rep2	r3-T10_LR026972.1_pKCRI-28-1_c116	r3-T96_NZ_CP032267.1_p10_010034_Acinetobacter_sp	r3-T60_NZ_CP084305.1_pXMC5X702-7.6k_A_pseudolwoffii	r3-T15_NZ_CP031714.1_p6_010060_A_wuhouensis	r3-T83_NZ_CP019146.1_pZS-6_A_lwoffii	r3-T9_CP026705.1_tig00000058_pilon_c120
r3-T80_NZ_CP059685.1_FDAARGOS_731_plasmid_unnamed1_A_radioresistens	0	439	404	453	544	426	425	527	516	430	430	435	458	428	18	466	376	521	429	422	471	410	455	456	308	431	415	425	21	428	433	406	455	432	480	548	546	440	418	547	429	426	470	457	425	405	413	442	440
r3-T86_NZ_CP045104.1_pAJ4131_A_johnsonii_rep1	439	0	396	495	521	370	392	516	490	375	371	329	450	374	377	458	333	508	366	368	481	396	496	498	437	366	352	457	436	422	383	389	497	422	499	526	526	174	455	525	361	371	451	449	426	371	397	400	450
r3-T5_CP065434.1_pAB17961-2_c98	404	396	0	481	525	295	334	506	487	342	275	374	420	346	351	462	163	508	272	350	487	128	479	480	403	356	334	332	401	400	348	270	482	397	479	514	514	384	410	511	355	344	444	447	332	139	306	391	430
r3-T3_CP027182.1_p4AR_0070_c25	453	495	481	0	566	471	444	559	519	451	462	483	496	452	385	501	447	548	458	497	528	501	11	8	473	460	491	497	455	481	457	466	7	485	523	556	555	481	465	553	470	442	506	494	485	491	471	488	492
r3-T102_NZ_CP024012.1_LoGeW2-3_plasmid_unnamed1_Acinetobacter_sp	544	521	525	566	0	529	522	226	553	535	524	522	548	517	461	537	475	242	523	515	573	528	564	564	551	520	518	549	545	539	513	512	567	525	542	351	353	526	536	353	541	515	532	527	538	518	520	541	487
r3-T1_NC_010605.1_pACICU1_c38	426	370	295	471	529	0	325	500	454	311	197	336	420	331	359	454	269	501	197	314	461	291	472	471	419	327	372	325	423	404	328	250	472	368	462	521	520	374	407	517	327	316	447	441	315	267	313	398	432
r3-T179_NC_025119.1_pM131-8_Acinetobacter_sp	425	392	334	444	522	325	0	516	472	278	322	381	429	306	366	488	312	508	322	376	463	342	442	441	412	235	388	375	422	362	314	324	445	418	483	519	519	391	414	516	301	224	486	461	374	327	300	362	434
r3-T45_CP044520.1_p29FS20-1_c15	527	516	506	559	226	500	516	0	535	514	512	515	537	499	445	528	456	116	512	508	548	523	556	556	533	499	505	537	526	530	501	502	558	519	526	325	327	500	522	325	516	491	515	522	538	501	509	533	475
r3-T26_NZ_CP104655.1_2021CK-01005_plasmid_unnamed4_A_variabilis	516	490	487	519	553	454	472	535	0	491	486	471	501	482	453	488	432	534	484	504	375	491	516	517	507	471	474	466	515	502	478	482	519	504	515	545	545	477	494	543	477	479	475	486	501	478	465	511	454
r3-T37_NC_009083.1_pAB1_c36	430	375	342	451	535	311	278	514	491	0	315	357	414	314	365	454	311	501	311	336	485	352	450	451	421	316	369	410	428	386	320	324	449	381	483	519	519	371	378	517	210	305	455	449	397	331	360	395	443
r3-T2_CP035050.1_p11.8Kbp_c46	430	371	275	462	524	197	322	512	486	315	0	347	430	332	363	458	252	497	10	340	464	280	462	461	424	341	374	328	430	411	332	245	461	375	459	520	519	364	409	516	333	322	454	441	331	251	325	409	440
r3-T113_NZ_MH999418.1_SWBY1_plasmid_unnamed_Acinetobacter_sp	435	329	374	483	522	336	381	515	471	357	347	0	434	373	373	454	330	513	346	374	465	380	483	482	445	371	145	422	435	442	368	345	482	430	487	523	522	331	436	520	380	370	463	454	395	355	386	417	465
r3-T34_CP059552.1_p4E-022166_A_seifertii_rep1	458	450	420	496	548	420	429	537	501	414	430	434	0	431	402	413	384	534	432	432	486	407	495	496	465	414	439	443	455	438	432	425	496	424	502	530	532	453	426	529	412	417	422	425	445	410	419	430	448
r3-T24_AP024806_pOCUAc18-4	428	374	346	452	517	331	306	499	482	314	332	373	431	0	381	461	310	489	330	356	468	356	453	453	411	319	399	403	421	398	21	321	453	394	479	512	511	360	371	509	316	321	438	433	386	328	343	401	445
r3-T80_NZ_CP119225.1_pAP54-2_A_proteolyticus	18	377	351	385	461	359	366	445	453	365	363	373	402	381	0	403	316	445	362	369	427	356	387	388	266	375	363	367	34	361	385	348	387	368	409	478	476	383	364	477	367	369	405	393	361	343	359	390	378
r3-T76_NZ_CP059686.1_FDAARGOS_731_plasmid_unnamed2_A_radioresistens	466	458	462	501	537	454	488	528	488	454	458	454	413	461	403	0	399	526	457	471	489	452	503	504	464	466	460	489	462	492	468	456	502	438	406	535	536	463	470	534	473	466	161	157	488	455	447	472	446
r3-T60_NC_021728.1_p2BJAB07104_A_baumannii	376	333	163	447	475	269	312	456	432	311	252	330	384	310	316	399	0	452	250	322	418	167	448	449	372	332	338	349	371	382	314	274	449	379	417	451	451	332	387	448	318	314	379	393	334	41	303	369	387
r3-T21_NZ_CP062186.1_AT235_plasmid_unnamed_A_towneri	521	508	508	548	242	501	508	116	534	501	497	513	534	489	445	526	452	0	494	496	555	516	546	545	531	508	505	530	518	541	491	498	547	505	533	338	338	504	520	336	511	497	510	520	524	498	502	537	473
r3-T2_NZ_CP094559.1_pYH12068-4_Acinetobacter_sp	429	366	272	458	523	197	322	512	484	311	10	346	432	330	362	457	250	494	0	339	463	277	458	457	424	335	375	329	429	411	330	243	457	377	456	518	517	359	403	514	329	319	450	437	329	247	326	406	439
r3-T13_CP026126.1_pABA-6973_c78	422	368	350	497	515	314	376	508	504	336	340	374	432	356	369	471	322	496	339	0	494	344	500	500	422	366	381	403	416	392	354	320	498	228	470	515	513	360	408	513	355	368	450	451	381	332	356	402	462
r3-T55_CP059555.1_p1E-022166_A_seifertii	471	481	487	528	573	461	463	548	375	485	464	465	486	468	427	489	418	555	463	494	0	487	528	528	506	456	474	480	472	477	468	474	525	487	507	569	569	487	506	566	485	461	478	480	483	472	456	471	448
r3-T62_NZ_CP032106.2_pALWEK1.3_A_lwoffii	410	396	128	501	528	291	342	523	491	352	280	380	407	356	356	452	167	516	277	344	487	0	498	500	415	367	345	337	406	397	351	288	499	384	483	516	516	395	417	515	359	355	443	442	335	142	318	395	424
r3_T3_CP059475.1_pM175-3.1	455	496	479	11	564	472	442	556	516	450	462	483	495	453	387	503	448	546	458	500	528	498	0	7	475	460	491	495	457	481	458	466	10	486	524	556	555	481	468	553	470	440	508	495	486	491	470	485	490
r3-T3_AP022239.1_pWP8-W18-ESBL-11_1_c21	456	498	480	8	564	471	441	556	517	451	461	482	496	453	388	504	449	545	457	500	528	500	7	0	476	460	490	495	458	481	457	466	9	486	523	554	553	482	469	551	471	440	508	495	485	492	469	486	489
r3-T28_NZ_CP094644.1_PK01_plasmid_unnamed_Acinetobacter_sp	308	437	403	473	551	419	412	533	507	421	424	445	465	411	266	464	372	531	424	422	506	415	475	476	0	430	428	436	303	431	417	409	475	414	490	535	535	442	402	533	407	408	472	465	423	405	424	452	458
r3-T85_NZ_CP054906.1_FDAARGOS_724_plasmid_unnamed3	431	366	356	460	520	327	235	499	471	316	341	371	414	319	375	466	332	508	335	366	456	367	460	460	430	0	386	389	428	370	324	324	460	406	481	499	500	372	404	497	314	103	477	456	373	348	305	361	444
r3-T194_NZ_CP041366.1_p1_A_tandoii	415	352	334	491	518	372	388	505	474	369	374	145	439	399	363	460	338	505	375	381	474	345	491	490	428	386	0	414	415	433	393	354	491	424	486	512	511	346	425	508	378	379	460	451	410	360	376	413	462
r3-T145_NZ_CP089042.1_pRIVM_C011601_4_A_ursingii	425	457	332	497	549	325	375	537	466	410	328	422	443	403	367	489	349	530	329	403	480	337	495	495	436	389	414	0	425	425	397	339	497	412	482	539	539	448	426	537	413	394	481	483	232	339	380	449	433
r3-T80_NZ_CP032268.1_p1_010034_Acinetobacter_sp_rep2	21	436	401	455	545	423	422	526	515	428	430	435	455	421	34	462	371	518	429	416	472	406	457	458	303	428	415	425	0	431	426	406	457	423	485	547	545	439	418	546	428	424	472	458	425	400	414	443	444
r3-T19_CP027179.1_p2AR_0070_c54.2	428	422	400	481	539	404	362	530	502	386	411	442	438	398	361	492	382	541	411	392	477	397	481	481	431	370	433	425	431	0	395	394	481	402	510	532	534	441	381	532	381	366	485	471	423	400	378	438	443
r3-T24_NZ_CP032006.1_pAhaem11616d_A_haemolyticus	433	383	348	457	513	328	314	501	478	320	332	368	432	21	385	468	314	491	330	354	468	351	458	457	417	324	393	397	426	395	0	322	458	397	474	514	513	364	370	511	321	325	440	443	388	330	344	403	447
r3-T31_LN865144.1_pCIP70.10_c71	406	389	270	466	512	250	324	502	482	324	245	345	425	321	348	456	274	498	243	320	474	288	466	466	409	324	354	339	406	394	322	0	468	371	468	496	495	374	380	495	351	320	451	451	332	275	297	392	433
r3-T3_CP046537.1_pXL380_c30	455	497	482	7	567	472	445	558	519	449	461	482	496	453	387	502	449	547	457	498	525	499	10	9	475	460	491	497	457	481	458	468	0	487	525	558	557	483	467	555	471	442	506	492	486	492	468	489	491
r3-T32_NZ_CP018873.1_pAHTJS2_A_haemolyticus_rep1	432	422	397	485	525	368	418	519	504	381	375	430	424	394	368	438	379	505	377	228	487	384	486	486	414	406	424	412	423	402	397	371	487	0	471	520	520	444	389	518	400	409	434	427	397	393	413	431	448
r3-T140_NZ_CP055288.1_pBspH6_Acinetobacter_sp	480	499	479	523	542	462	483	526	515	483	459	487	502	479	409	406	417	533	456	470	507	483	524	523	490	481	486	482	485	510	474	468	525	471	0	535	535	495	493	534	494	476	389	378	413	467	472	480	453
r3-T7_NZ_CP069498.1_FDAARGOS_1217_plasmid_unnamed2_A_pittii	548	526	514	556	351	521	519	325	545	519	520	523	530	512	478	535	451	338	518	515	569	516	556	554	535	499	512	539	547	532	514	496	558	520	535	0	6	510	523	6	504	502	536	526	515	499	502	538	467
r3-T7_NC_010404.1_p3ABAYE_c2	546	526	514	555	353	520	519	327	545	519	519	522	532	511	476	536	451	338	517	513	569	516	555	553	535	500	511	539	545	534	513	495	557	520	535	6	0	508	523	4	502	503	535	525	515	499	501	539	468
r3-T33_CP033751.1_p1FDAARGOS_540_c82	440	174	384	481	526	374	391	500	477	371	364	331	453	360	383	463	332	504	359	360	487	395	481	482	442	372	346	448	439	441	364	374	483	444	495	510	508	0	450	508	355	360	455	456	426	364	399	401	471
r3-T91_NZ_CP028798.2_p1_010059_A_junii	418	455	410	465	536	407	414	522	494	378	409	436	426	371	364	470	387	520	403	408	506	417	468	469	402	404	425	426	418	381	370	380	467	389	493	523	523	450	0	522	401	399	455	448	397	402	390	468	473
r3-T7_CP033769.1_p2FDAARGOS_533_c4	547	525	511	553	353	517	516	325	543	517	516	520	529	509	477	534	448	336	514	513	566	515	553	551	533	497	508	537	546	532	511	495	555	518	534	6	4	508	522	0	501	500	535	525	515	496	499	537	467
r3-T142_NZ_CP098733.1_Y-23_plasmid_unnamed_A_tibetensis	429	361	355	470	541	327	301	516	477	210	333	380	412	316	367	473	318	511	329	355	485	359	470	471	407	314	378	413	428	381	321	351	471	400	494	504	502	355	401	501	0	309	451	461	386	342	358	372	437
r3-T84_NZ_CP113448.1_pC9_6_A_baumannii	426	371	344	442	515	316	224	491	479	305	322	370	417	321	369	466	314	497	319	368	461	355	440	440	408	103	379	394	424	366	325	320	442	409	476	502	503	360	399	500	309	0	461	450	367	336	290	346	438
r3-T8_NZ_CP045104.1_pAJ4131_A_johnsonii_rep2	470	451	444	506	532	447	486	515	475	455	454	463	422	438	405	161	379	510	450	450	478	443	508	508	472	477	460	481	472	485	440	451	506	434	389	536	535	455	455	535	451	461	0	164	469	428	454	466	457
r3-T10_LR026972.1_pKCRI-28-1_c116	457	449	447	494	527	441	461	522	486	449	441	454	425	433	393	157	393	520	437	451	480	442	495	495	465	456	451	483	458	471	443	451	492	427	378	526	525	456	448	525	461	450	164	0	471	443	431	464	446
r3-T96_NZ_CP032267.1_p10_010034_Acinetobacter_sp	425	426	332	485	538	315	374	538	501	397	331	395	445	386	361	488	334	524	329	381	483	335	486	485	423	373	410	232	425	423	388	332	486	397	413	515	515	426	397	515	386	367	469	471	0	325	363	437	433
r3-T60_NZ_CP084305.1_pXMC5X702-7.6k_A_pseudolwoffii	405	371	139	491	518	267	327	501	478	331	251	355	410	328	343	455	41	498	247	332	472	142	491	492	405	348	360	339	400	400	330	275	492	393	467	499	499	364	402	496	342	336	428	443	325	0	304	398	431
r3-T15_NZ_CP031714.1_p6_010060_A_wuhouensis	413	397	306	471	520	313	300	509	465	360	325	386	419	343	359	447	303	502	326	356	456	318	470	469	424	305	376	380	414	378	344	297	468	413	472	502	501	399	390	499	358	290	454	431	363	304	0	346	439
r3-T83_NZ_CP019146.1_pZS-6_A_lwoffii	442	400	391	488	541	398	362	533	511	395	409	417	430	401	390	472	369	537	406	402	471	395	485	486	452	361	413	449	443	438	403	392	489	431	480	538	539	401	468	537	372	346	466	464	437	398	346	0	459
r3-T9_CP026705.1_tig00000058_pilon_c120	440	450	430	492	487	432	434	475	454	443	440	465	448	445	378	446	387	473	439	462	448	424	490	489	458	444	462	433	444	443	447	433	491	448	453	467	468	471	473	467	437	438	457	446	433	431	439	459	0
r3-T45_NZ_CP094257.1_pBDT2076-3_A_indicus	527	516	507	561	228	503	515	7	535	514	513	515	535	498	445	528	457	118	513	509	548	522	557	557	535	499	506	536	526	533	500	499	560	519	523	323	325	500	524	323	515	491	516	523	537	501	506	533	475
r3-T87_NZ_CP048679.1_pYH12138-9_Acinetobacter_sp	422	370	332	453	522	313	222	497	461	311	322	384	409	326	370	469	314	506	323	377	454	352	450	449	410	188	381	379	419	370	330	324	454	412	473	506	506	373	414	503	309	168	465	455	368	331	286	348	433
r3-T40_NC_010398.1_p3ABSDF_c72	420	374	361	455	513	326	219	511	453	316	338	383	429	317	363	466	326	503	333	370	469	364	456	455	412	199	388	392	415	377	319	340	456	416	475	517	517	380	404	515	326	192	472	449	385	345	305	376	431
r3-T1_CP014217.1_p1YU-R612_c57	416	370	294	468	526	4	325	498	454	315	200	335	419	331	351	450	268	501	201	314	459	290	469	468	413	326	371	325	413	398	328	248	469	367	463	520	519	374	407	516	330	314	446	438	315	267	311	396	429
r3-T6_CP042207.1_pTS9900_c75.2	449	460	445	497	534	437	466	528	474	449	430	459	413	450	384	170	382	521	426	460	480	442	498	498	476	448	451	468	451	471	453	442	498	438	385	526	525	473	467	523	457	442	180	127	465	436	433	451	452
r3-T36_KY984047.1_pAb242_25_c103	419	455	403	472	533	394	396	519	503	376	401	431	434	366	362	477	371	519	400	412	508	401	473	473	397	388	426	412	414	392	368	373	475	403	478	526	526	444	139	525	390	389	461	448	394	388	386	447	470
r3-T105_NZ_CP045123.1_pXG-13k_A_indicus	518	509	518	529	539	530	517	527	490	514	532	510	509	533	466	513	455	517	529	530	508	529	529	528	493	516	488	526	518	510	534	529	529	525	529	532	532	516	514	530	515	512	512	508	513	535	518	549	472
r3-T86_NZ_CP079795.1_pAJ_082-4_A_johnsonii	434	47	399	496	514	375	389	505	482	371	373	324	449	354	376	457	334	500	370	370	475	401	496	497	433	360	350	448	432	435	362	376	496	423	488	514	514	174	454	513	357	369	451	447	424	373	402	403	457
r3-T14_NZ_AP019745.1_pARA5_A_radioresistens	419	381	296	481	515	254	324	497	482	322	265	357	422	333	357	461	278	493	260	338	471	290	479	478	411	325	374	329	416	392	334	216	480	385	475	511	511	382	389	509	340	317	443	442	326	282	321	389	433
r3-T33_LR026974.1_pKCRI-49-1_c83	439	171	383	483	523	371	390	497	476	367	366	333	456	358	382	462	334	499	361	360	483	400	483	484	444	370	348	447	438	440	364	374	485	441	499	512	510	10	451	510	358	360	451	454	427	366	398	401	470
r3-T54_CP040262.1_p1P7774_c63	448	404	392	471	529	363	296	520	464	335	374	402	434	356	376	489	358	513	370	414	490	393	470	471	427	266	414	390	443	376	356	366	470	423	486	526	526	409	396	524	366	259	493	471	396	376	377	439	446
r3-T10_NZ_CP044462.1_pB18-7_A_indicus	457	448	446	494	527	440	460	522	486	449	440	453	424	433	394	159	392	519	436	451	479	442	495	495	464	455	450	482	458	471	443	450	492	426	377	524	523	455	447	523	461	449	165	2	470	442	430	464	446
r3-T8_KT022421.1_pAB-ML_c119	469	451	446	505	529	445	481	517	482	453	452	459	419	445	408	167	381	512	448	456	471	439	506	507	472	467	454	487	470	489	448	449	506	443	392	536	535	450	459	535	451	456	41	164	470	430	451	459	456
r3-T43_KT346360.1_pRCH52-1_c84	415	360	129	484	526	255	321	503	482	325	247	360	418	335	353	461	115	502	242	337	477	150	483	485	399	335	366	340	411	388	339	276	485	399	466	502	502	353	412	499	340	324	443	445	331	92	301	395	431
r3-T97_NZ_CP061563.1_pAS73-2_A_seifertii	414	419	342	478	537	350	371	527	488	379	356	414	439	380	362	466	342	527	354	384	494	346	481	481	414	396	397	378	408	390	384	328	481	386	490	525	526	419	389	524	382	384	454	441	380	342	382	453	430
r3-T35_NZ_ALIR01000018.1_pWCA157-7.5_A_radioresistens	430	442	425	492	540	410	420	536	502	409	408	443	215	420	376	429	400	533	407	418	486	416	492	492	443	411	440	451	430	427	422	416	491	407	500	538	540	452	432	538	412	405	425	405	449	429	418	433	445
r3-T156_NZ_CP029394.2_p6_010030_A_defluvii	469	454	473	522	569	453	452	534	377	466	450	452	466	453	422	472	404	545	450	483	130	474	523	523	497	452	462	480	467	479	452	465	522	478	513	566	566	465	502	563	466	452	471	461	483	460	450	477	453
r3-T3_CP041590.1_pJ9-3_c29	454	496	479	7	564	471	443	557	515	449	461	482	495	453	386	504	448	545	457	499	527	498	6	3	475	460	490	494	456	480	458	466	6	485	524	556	555	482	467	553	470	442	508	495	485	491	470	486	491
r3-T195_NZ_CP010351.1_pXBB1-9_rep1_A_johnsonii	420	433	356	486	532	336	384	522	491	389	356	427	452	387	366	483	348	516	361	380	502	357	485	484	415	396	421	375	416	400	383	348	487	388	495	523	522	428	398	522	404	381	474	463	379	349	365	442	433
r3-T29_NZ_CP033126.1_p6_010062_A_wuhouensis	451	346	375	494	518	373	408	496	475	383	362	266	434	384	394	460	354	496	363	376	491	399	491	490	446	387	251	431	451	458	390	369	493	425	487	505	507	332	443	505	380	379	460	458	429	380	391	418	443
r3-T115_NZ_CP043308.1_pAcsw19-1_A_johnsonii_rep1	427	362	347	451	510	316	223	496	469	321	328	370	425	319	374	466	322	507	324	365	460	356	451	451	422	84	373	394	426	369	326	326	449	409	475	501	502	362	410	499	313	76	460	449	367	339	286	351	443
r3-T13_CP059388.1_p2.36-1512_c79	422	370	347	496	520	312	371	512	500	338	337	373	428	356	365	471	319	499	335	11	497	341	499	499	420	368	380	403	416	393	354	318	497	229	472	520	518	361	407	518	353	368	451	452	381	330	359	403	462
r3-T4_AY541809.1_pMAC_c66	427	362	344	503	514	310	362	513	483	341	324	337	407	349	371	463	323	499	326	145	474	356	501	500	431	358	379	407	423	402	349	307	501	230	474	522	520	363	412	519	355	359	448	449	384	336	351	399	449
r3-T88_NZ_CP026416.1_pACI-3569_Acinetobacter_sp	530	538	522	555	299	514	531	275	534	519	510	527	547	512	450	548	462	278	508	522	568	517	554	555	542	528	521	547	527	542	513	510	551	526	532	342	344	542	525	342	512	513	539	548	541	511	515	541	477
r3-T71_AP024810_pOCUAc18-8	450	453	343	492	561	350	380	547	523	408	358	432	479	382	387	499	346	539	359	419	516	354	492	491	444	393	428	337	449	437	381	337	492	435	464	539	540	436	426	538	422	394	493	486	306	341	371	472	451
r3-T18_CP042561.1_pE47_005_c53	501	489	483	534	539	474	487	532	325	485	475	470	480	480	432	485	436	531	474	495	412	474	530	531	504	485	466	484	499	500	480	465	533	478	526	520	519	493	485	518	487	480	488	479	517	477	461	504	457
r3-T3_CM008330.1_pAC0021R4_c22	454	495	481	6	567	469	443	559	519	451	460	481	497	453	385	505	448	547	456	496	527	500	13	8	472	458	489	496	456	478	457	467	9	482	525	556	555	481	467	553	470	440	508	495	483	491	469	487	492
r3-T198_NZ_JABAGU010000004.1_pAJ1_2_A_johnsonii	436	380	348	461	527	346	338	513	486	323	347	416	430	246	376	467	315	509	343	348	493	366	461	460	401	349	404	415	432	378	254	342	464	394	477	509	510	371	377	508	321	347	454	443	390	341	365	392	441
r3-T46_NZ_CP113443.1_pC9_1_A_baumannii	546	549	525	563	366	519	528	350	563	527	517	540	551	522	474	541	475	361	516	525	563	529	562	561	546	531	546	547	545	546	521	515	562	540	539	241	237	549	541	238	527	532	539	537	533	519	510	545	471
r3-T20_NZ_ALIR01000021.1_pWCA157-53_A_radioresistens	500	494	502	549	546	491	496	529	501	497	506	516	520	515	424	497	458	523	506	515	531	504	552	551	483	509	503	521	499	522	517	495	551	507	535	538	539	496	505	536	501	494	497	485	513	506	519	510	489
r3-T15_CP061712_p2E072658	413	391	306	472	516	313	298	506	460	362	327	385	418	339	360	446	302	502	326	356	450	317	470	470	421	296	378	379	413	375	340	296	470	411	474	501	502	395	390	500	355	282	451	431	363	301	12	336	437
r3-T104_NZ_CP044488.1_pHZE30-1-5_A_schindleri	532	523	507	550	566	509	526	558	511	508	511	529	549	536	460	537	448	547	508	525	488	515	547	548	528	519	531	527	530	514	532	535	547	525	540	557	557	518	535	555	523	518	518	519	492	511	519	532	477
r3-T8_EU294228.1_pABIR_c117	467	450	443	506	535	450	485	519	479	459	457	465	424	439	403	164	376	515	453	453	481	441	508	508	474	470	460	483	470	490	440	450	508	438	391	540	539	454	458	539	449	459	11	167	468	425	453	465	458
r3-T44_CP033753.1_p3FDAARGOS_540_c14	534	515	513	556	213	528	519	222	558	514	526	527	546	494	452	541	465	221	523	503	556	515	555	555	534	522	519	557	535	535	496	503	555	518	529	345	345	523	535	347	518	517	534	514	536	511	516	528	482
r3-T7_NZ_CM012183.1_p1ZQ9_A_bereziniae	544	518	510	556	356	522	515	337	540	515	523	520	533	507	476	540	448	343	520	509	563	514	556	554	528	498	511	539	541	531	507	492	558	514	531	24	20	504	523	22	497	503	537	528	512	499	501	532	469
r3-T90_NZ_CP060812.1_pXM9F202-2-186k_A_variabilis	529	512	508	547	228	499	511	75	534	502	511	508	525	493	447	524	461	123	509	509	549	521	543	543	537	502	506	534	530	525	494	493	546	513	522	321	323	505	521	321	511	493	520	519	534	510	504	524	473
r3-T97_NZ_CP098481.1_pAspC32I_Acinetobacter_sp	416	415	341	489	532	356	372	528	488	381	358	408	446	374	362	473	342	524	356	381	494	343	492	492	419	392	392	376	414	395	376	327	492	392	487	526	525	415	393	524	387	384	453	449	380	340	380	452	435
r3-T8_NZ_CP018141.1_pRW1_A_larvae	468	448	442	505	531	450	487	517	478	459	457	461	422	436	405	166	378	512	453	450	479	445	507	507	472	472	456	484	470	486	438	455	505	438	391	538	537	455	457	537	452	459	11	166	469	427	452	467	458
r3-T25_NZ_KX426229.1_pALWED2.1_A_lwoffii	523	515	504	554	228	500	513	22	532	514	512	513	535	499	441	531	458	115	512	508	548	521	550	550	534	500	504	532	521	530	499	497	553	517	521	327	329	495	525	327	515	492	518	526	535	501	505	534	474
r3-T62_NZ_CP015621.1_p6AsACE_A_schindleri	409	396	125	500	527	289	340	521	491	352	282	380	405	356	355	454	166	516	277	346	486	4	497	499	415	364	345	335	405	396	351	287	500	385	483	513	513	395	416	512	358	355	445	445	334	141	316	395	425
r3-T91_NZ_AP018826.1_pAURM-2_A_ursingii	418	460	410	463	535	401	408	521	493	379	409	440	430	369	364	471	388	524	405	407	508	420	466	467	402	403	427	426	418	376	368	379	465	387	488	524	524	450	15	523	399	395	451	448	396	403	391	469	473
r3-T171_NZ_CP032280.1_p1_010055_Acinetobacter_sp	473	471	471	484	558	470	458	535	523	492	484	482	401	464	410	484	452	541	482	448	514	456	487	485	481	452	480	476	466	460	457	455	487	448	513	538	537	472	456	537	486	450	494	492	475	471	450	480	475
r3-T85_NZ_CP084309.1_pXMC5X702-5k_A_pseudolwoffii	431	366	355	461	523	326	233	501	471	317	340	370	414	318	375	466	333	508	334	366	457	368	461	461	431	5	386	390	428	372	323	325	461	407	482	502	503	370	404	500	312	102	475	456	373	349	305	360	443
r3-T121_NZ_CP077234.1_FDAARGOS_1397_plasmid_unnamed2_A_pittii	529	527	518	544	570	500	499	561	542	500	504	539	542	517	450	518	469	556	497	530	552	520	545	546	509	497	523	518	531	534	521	506	543	521	540	548	549	527	530	545	495	485	512	516	506	511	533	519	484
r3-T1_NZ_MK978163.1_pAVAci94_A_lwoffii	423	363	292	474	524	40	322	497	460	312	195	341	420	334	354	457	260	495	197	309	453	291	475	474	425	322	365	318	421	401	335	244	475	368	457	517	516	366	404	513	326	315	446	443	308	258	316	398	427
r3-T72_CP059544.1_p2E-011922	458	448	418	500	557	423	427	537	492	420	429	442	73	437	402	422	395	539	427	434	500	419	500	501	460	417	444	446	460	443	436	436	503	429	496	539	541	454	434	538	411	418	422	428	451	423	424	440	449
r3-T178_NZ_CP030757.1_H3_plasmid_unnamed3_A_schindleri	433	289	415	493	535	375	389	525	506	384	392	350	431	399	374	477	360	522	389	381	486	422	495	493	430	401	357	462	440	437	403	381	495	446	490	521	519	252	442	519	362	401	467	464	432	391	406	398	462
r3-T25_NZ_CP068185.1_FDAARGOS_1094_plasmid_unnamed1_A_johnsonii	537	520	505	554	230	506	513	61	540	509	520	512	532	492	454	527	458	107	520	509	550	520	550	550	546	500	504	534	534	529	495	498	553	508	522	329	331	505	527	329	513	492	515	523	539	507	506	529	474
r3-T65_NZ_CP031985.1_pAhaemAN3c_A_haemolyticus	422	455	404	471	540	399	413	522	495	372	409	432	435	374	362	466	380	524	404	399	513	412	474	475	397	405	424	428	424	385	375	390	473	381	488	523	523	452	62	522	389	391	451	445	395	396	392	462	469
r3-T80_NZ_CP041296.1_p80-1-2-p2_A_indicus	4	438	405	452	543	425	424	526	516	430	430	434	458	427	16	466	376	520	429	420	471	412	454	455	309	430	414	427	23	426	432	405	454	433	480	548	546	441	416	547	431	425	469	455	426	405	412	441	440
r3-T88_NZ_CP048660.1_pYH12207-1_A_piscicola_rep2	531	539	524	556	299	512	531	274	534	517	510	525	548	514	450	547	464	277	506	522	570	516	555	556	543	528	521	546	528	544	515	512	552	528	532	341	343	541	525	341	514	515	539	547	542	511	517	542	478
r3-T3_NZ_CP110466.1_pRBH2-4_A_baumannii	456	498	480	9	564	471	441	556	517	451	461	482	496	453	388	504	449	545	457	500	528	500	8	1	477	460	490	495	458	482	457	466	10	486	523	554	553	482	469	551	471	440	509	496	486	492	469	486	489
r3-T55_CP042564.1_pE47_008_c64	472	482	488	527	574	459	463	548	374	483	464	465	487	467	427	489	420	554	463	495	5	488	527	527	506	455	473	482	473	477	467	473	524	487	509	567	567	487	507	564	485	461	478	480	486	474	455	473	446
r3-T90_NZ_CP078028.1_pAV_175-2_A_variabilis	524	515	507	552	228	499	511	49	530	512	512	513	532	499	441	525	460	126	512	508	548	517	548	548	540	499	505	534	523	528	499	497	551	516	513	327	329	498	526	327	512	490	514	516	539	503	505	534	472
r3-T161_NZ_JABAGU010000008.1_pAJ1_5_A_johnsonii	428	435	341	479	542	302	395	532	474	381	326	389	428	387	366	454	327	520	324	390	460	333	479	477	418	380	388	344	423	375	384	322	477	381	472	529	528	424	376	525	387	383	442	446	348	329	380	444	445
r3-T20_NZ_CP010903.1_p6411-66.409kb_A_nosocomialis	500	496	501	554	552	492	501	532	495	503	507	519	524	516	424	494	456	530	507	516	532	503	557	558	489	511	510	522	499	525	517	498	557	511	532	541	542	500	510	539	506	498	497	488	515	506	518	509	485
r3-T20_NZ_MK978162.1_pAVAci14_A_lwoffii	499	500	502	560	555	492	503	535	495	506	507	522	527	521	425	495	454	531	507	518	537	501	563	563	489	512	508	525	498	526	521	498	562	511	530	539	540	502	507	537	507	500	498	487	514	506	518	513	486
r3-T25_NZ_CP080577.1_pALWVS1.1_A_lwoffii	530	520	507	558	237	502	512	54	540	509	510	519	537	498	449	530	459	94	510	506	554	524	554	554	540	504	512	536	529	531	499	498	557	513	525	334	336	504	524	334	512	493	517	525	539	506	507	532	470
r3-T62_NC_025171.1_pM131-5_Acinetobacter_sp	409	397	126	499	526	289	339	520	491	352	282	380	406	357	355	454	167	515	277	347	486	5	496	498	415	365	346	334	405	395	352	287	499	385	482	512	512	396	416	511	358	354	445	445	333	142	315	395	425
r3-T3_CP034093.1_pA52-1_c28	454	496	483	9	567	473	443	559	518	449	459	484	497	453	385	503	447	549	455	498	527	501	16	11	474	458	493	497	457	481	457	469	14	486	522	553	552	481	469	550	473	440	508	495	484	491	469	487	490
r3-T17_CP015365.1_pAba3207a_c51	443	185	388	479	524	329	372	508	461	337	345	323	436	361	381	470	328	504	343	370	462	395	479	478	437	355	360	442	443	440	360	365	480	421	485	503	503	172	451	502	327	346	456	463	418	365	386	377	466
r3-T11_GU978998_p844_c92	413	384	299	478	510	258	328	498	481	326	262	349	419	329	346	452	283	492	260	349	478	287	475	474	413	329	373	337	409	388	333	201	479	370	483	497	497	371	389	496	344	317	448	444	327	285	327	390	432
r3-T7_CP038263.1_pEC_gr13_c5	547	525	511	553	354	517	516	325	543	517	516	520	529	509	477	534	448	336	514	513	566	515	553	551	533	497	508	537	546	532	511	495	555	518	534	9	7	508	522	3	501	500	535	525	515	496	499	537	467
r3-T89_NZ_CP089048.1_pRIVM_C010761_4_A_ursingii	537	533	507	546	313	512	516	297	555	520	516	517	541	505	459	534	473	288	517	511	563	505	542	541	529	522	512	541	539	557	503	491	545	522	526	354	354	528	541	352	520	503	534	524	513	511	514	525	487
r3-T35_NZ_CP087339.1_p4DB053_A_baumannii	430	446	427	491	542	409	424	538	505	414	406	437	215	427	376	433	403	535	405	422	487	414	491	491	446	414	438	452	429	424	427	416	490	409	500	537	537	454	434	535	418	403	427	407	448	433	419	437	443
r3-T22_CM013137.1_pAB18PR065-MCR-4.3_c102	426	447	402	476	541	394	399	521	491	384	399	436	434	369	368	484	373	523	396	407	509	399	478	478	404	391	425	416	422	386	374	380	479	390	482	523	523	435	140	522	387	389	462	448	389	388	387	452	468
r3-T103_NZ_CP084301.1_pXMC5X702-195k_A_pseudolwoffii	542	544	531	554	349	529	537	328	553	527	527	535	549	520	472	539	471	327	525	524	563	538	553	552	557	540	537	556	540	557	522	532	554	538	549	254	252	544	535	250	530	539	542	542	539	524	530	549	473
r3-T80_NZ_CP026617.1_pSWBY1_Acinetobacter_sp	23	439	404	456	537	422	422	526	516	428	429	436	456	426	34	467	371	518	428	424	478	408	459	460	303	429	418	426	27	430	431	408	459	430	480	547	545	442	422	546	431	425	466	462	429	404	416	441	447
r3-T38_NC_010395_p1ABSDF_c96	416	397	321	482	526	311	312	513	456	358	321	384	417	349	361	444	297	508	317	368	460	323	481	481	417	309	397	376	418	386	349	308	480	412	481	505	504	406	388	502	349	301	449	440	364	303	95	374	439
r3-T88_NZ_CP090068.1_pYUSHP14-1_Acinetobacter_sp	532	541	522	557	299	515	530	277	533	518	511	529	548	511	451	547	462	279	509	526	570	517	556	557	544	527	524	548	528	546	513	512	553	527	533	343	345	545	527	343	516	514	542	548	542	511	519	544	476
r3-T85_NZ_CP118967.1_DSM_2403_plasmid_unnamed4_A_lwoffii	430	365	356	460	519	327	234	497	472	317	341	369	414	319	375	467	333	506	335	366	456	367	460	460	430	2	385	390	427	369	324	324	460	406	482	500	501	370	404	498	313	103	477	456	374	348	305	360	444
r3-T7_NZ_CP068175.1_FDAARGOS_1096_plasmid_unnamed1_A_ursingii	545	525	510	555	353	521	518	327	547	518	523	521	533	508	476	537	449	335	521	510	567	514	555	553	533	502	508	537	544	533	510	495	557	518	532	17	13	509	524	15	501	504	534	526	512	498	503	538	472
r3-T78_CP087596_pAb01-2	413	380	345	452	513	341	321	500	471	327	337	346	421	354	355	452	319	513	339	350	465	345	453	454	426	324	360	386	412	410	356	334	451	392	473	516	517	373	421	514	350	305	455	432	400	336	315	362	433
r3-T88_NZ_CP048671.1_pYH12138_Acinetobacter_sp	530	539	525	555	299	512	531	274	534	517	510	525	547	514	449	548	465	277	506	523	571	517	554	555	543	528	521	547	527	544	515	512	551	528	533	340	342	541	525	340	513	515	540	548	543	512	517	542	477
r3-T3_NZ_CP087333.1_p2LMG994_A_baumannii	456	497	482	10	566	470	444	559	517	450	460	483	497	451	386	501	450	549	456	498	526	502	19	12	473	455	491	497	459	482	455	466	15	483	522	552	551	482	471	549	473	439	507	495	484	494	468	489	491
r3-T28_CP098792.1_p1VB280820	310	435	402	472	549	417	411	532	507	419	423	444	465	410	268	463	371	529	421	419	505	414	474	475	5	431	429	437	305	429	416	410	474	416	490	532	532	440	401	530	406	409	471	463	424	403	424	450	457
r3-T64_CP053221.1_p1DT01139C_c105	400	392	142	485	517	271	338	501	491	336	249	383	420	361	348	451	190	503	247	358	480	161	483	484	396	349	343	333	395	389	362	283	484	392	471	512	512	382	414	510	351	331	447	442	336	169	310	402	441
r3-T72_NZ_CP055287.1_pBspH5_Acinetobacter_sp	459	449	418	500	559	422	426	539	490	420	430	442	72	438	403	422	393	541	428	436	500	418	500	501	460	417	446	445	461	441	437	437	503	430	496	540	542	456	433	539	412	418	420	426	451	421	424	440	448
r3-T67_CP059303.1_pAC1633-2_c108	415	424	352	482	514	372	375	506	469	381	373	418	406	374	353	457	347	508	372	266	489	359	484	484	415	376	403	402	420	401	374	348	485	278	476	509	508	425	381	507	384	372	454	435	389	372	367	405	447
r3-T25_NZ_CP068202.1_FDAARGOS_1092_plasmid_unnamed1_A_johnsonii	537	518	504	549	236	505	511	70	540	510	519	513	528	492	454	531	458	111	519	509	550	519	545	545	544	500	508	531	534	532	494	496	548	509	523	331	333	505	525	331	509	492	515	527	537	507	506	529	474
r3-T35_NZ_AFDB02000003.1_pNaval81-26_c100	430	443	431	491	540	415	420	541	504	411	412	438	216	421	376	437	397	539	411	416	486	416	491	491	445	414	432	452	429	421	423	418	490	405	502	539	539	455	429	537	415	407	428	410	453	426	419	438	444
r3-T24_NZ_CP061649.1_pAS39-3_A_seifertii	431	379	352	455	516	331	310	502	480	321	334	373	431	17	384	464	313	491	332	354	466	356	456	455	418	317	401	400	424	396	16	322	456	398	479	512	511	364	370	509	317	326	438	438	382	329	344	403	447
r3-T3_CP028139.1_pAbNCIMB8209_134_c26	455	497	480	3	565	470	441	559	518	450	460	480	495	453	387	502	448	546	456	499	528	500	10	5	476	459	488	496	457	480	457	466	8	485	523	554	553	483	468	551	471	441	507	495	484	492	469	487	492
r3-T62_NZ_CP039152.1_p10FS3-1-9_Acinetobacter_sp	409	397	126	502	529	292	341	522	492	352	280	381	405	356	355	452	166	517	277	345	487	3	499	501	415	365	345	337	405	395	351	289	500	385	483	515	515	396	418	514	359	356	444	442	335	141	316	395	424
r3-T94_NZ_CP032105.2_pALWEK1.2_A_lwoffii	531	510	499	546	543	517	512	534	498	518	515	509	526	516	464	523	451	519	513	528	528	507	548	546	493	521	489	532	532	509	515	521	547	528	529	528	528	501	519	526	516	514	506	516	505	515	525	523	465
r3-T110_NZ_CP068178.1_FDAARGOS_1096_plasmid_unnamed3_A_ursingii	440	407	384	473	531	368	297	526	474	352	386	398	445	367	373	499	354	527	380	412	487	399	473	473	444	268	415	408	438	389	364	378	474	431	481	525	525	421	411	522	362	274	495	484	402	374	381	429	452
r3-T85_NZ_CP054824.1_FDAARGOS_551_plasmid_unnamed2_A_lwoffii	431	366	357	461	520	328	235	498	472	316	342	370	415	319	375	467	333	507	336	366	456	368	461	461	430	1	386	390	428	370	324	325	461	406	482	500	501	371	405	498	314	102	477	456	374	349	306	361	444
r3-T136_NZ_CP028799.2_p2_010059_A_junii	433	399	427	493	534	398	412	514	486	413	415	324	458	415	373	491	380	502	411	422	488	431	496	497	447	419	318	432	435	444	416	396	493	435	486	516	515	391	432	513	424	412	469	472	415	411	403	458	442
r3-T175_NZ_CP033124.1_p4_010062_A_wuhouensis	437	305	378	480	518	355	380	513	483	362	361	109	435	380	375	461	323	500	358	354	467	382	481	481	431	377	151	439	434	427	381	362	481	435	489	522	521	312	433	518	383	376	458	455	412	347	388	417	457
r3-T180_NZ_CP033120.1_p11_010062_A_wuhouensis	479	425	422	514	536	403	400	524	476	420	395	407	475	426	418	365	370	508	392	433	461	428	516	517	467	396	421	466	477	465	427	407	515	461	413	526	527	424	462	525	418	383	363	368	465	411	364	392	462
r3-T76_CP061707_p7E072658_H2787_18195	465	457	463	506	536	454	488	529	491	454	457	454	416	461	403	9	401	526	456	468	491	454	508	509	467	465	458	487	461	492	468	458	507	438	407	536	535	462	474	533	472	465	161	157	488	456	447	477	449
r3-T128_NZ_CP016897.1_pGFJ1_A_soli	534	528	509	547	306	506	514	301	550	515	510	512	542	506	455	537	471	290	506	505	572	502	545	544	536	517	507	541	536	551	506	488	547	520	522	357	357	520	533	355	518	501	539	529	514	505	509	529	489
r3-T80_NZ_CP025619.2_pSGAir0122_A_schindleri	4	438	405	453	544	425	424	527	516	430	430	434	458	427	16	466	376	521	429	420	471	412	455	456	308	430	415	426	23	427	432	405	455	432	480	549	547	441	418	548	431	425	471	455	426	405	412	441	440
r3-T131_NZ_CP090384.1_pNDM_SCLZS30_A_towneri	539	528	530	550	353	524	531	333	534	521	528	529	552	510	463	534	468	336	527	523	549	532	550	549	554	531	535	541	537	542	509	508	550	538	531	292	292	537	525	290	513	520	531	537	531	516	493	537	470
r3-T82_NZ_CP032268.1_p1_010034_Acinetobacter_sp_rep1	504	517	512	565	563	493	510	531	519	506	523	513	548	520	426	532	479	534	525	521	575	516	566	567	494	526	513	528	499	521	523	502	565	528	530	530	531	524	523	531	495	510	514	515	529	516	536	520	501
r3-T18_NZ_CP031712.1_p4_010060_A_wuhouensis_rep1	504	492	481	534	539	477	486	534	326	490	478	474	484	482	435	488	435	535	477	499	415	474	530	531	507	486	470	480	502	502	481	469	533	480	521	522	521	495	487	520	492	480	491	482	513	475	465	505	459
r3-T59_AP023080.1_pOCU_Ac16a_3_c85	411	373	290	472	516	240	317	510	480	326	254	351	423	328	342	456	277	503	254	329	471	289	472	471	416	331	363	325	405	402	331	202	471	372	482	515	515	366	390	514	348	320	447	448	321	280	325	397	447
r3-T25_CP051867.1_pAb-C63_1_c13	535	522	504	555	231	505	513	63	541	509	520	512	531	491	452	527	457	106	520	507	549	519	551	551	545	499	504	533	532	529	494	497	554	507	519	330	332	506	525	330	513	492	515	523	538	506	504	530	472
r3-T146_NZ_CP032271.1_p3_010034_Acinetobacter_sp	426	375	269	480	516	223	336	498	485	321	121	352	424	329	361	453	256	492	123	335	474	280	481	480	426	346	381	336	423	414	328	237	480	382	468	506	505	368	411	504	335	334	447	438	337	252	337	399	440
r3-T116_NZ_CP060814.1_pXM9F202-2-17k_A_variabilis	406	418	345	493	514	366	378	496	486	379	355	397	442	362	360	469	337	491	351	397	494	334	493	494	420	377	391	406	407	402	364	339	494	375	498	489	490	399	395	488	389	369	465	453	389	340	362	413	455
r3-T93_NZ_CP080637.1_pALWEK1.13_A_lwoffii	425	375	341	450	523	319	278	504	491	147	315	375	418	310	364	460	317	498	311	341	489	357	447	448	416	309	379	396	420	373	312	342	449	401	491	499	499	364	392	497	214	298	468	459	384	333	362	397	438
r3-T62_NZ_CP072554.1_pH7-11_A_lwoffii	373	373	113	453	481	262	313	474	454	322	252	355	377	332	351	422	150	471	248	322	457	7	450	452	375	338	332	296	370	366	328	263	452	357	441	470	470	369	375	469	331	329	416	415	287	126	290	372	390
r3-T2_CM009045.2_p1ZQ4_c45	430	370	274	462	524	197	323	512	485	315	2	348	429	331	363	459	251	497	8	339	463	279	462	461	424	340	373	328	430	411	331	244	461	375	459	520	519	363	409	516	332	321	453	440	331	250	326	408	440
r3-T20_CP053220.1_p2DT01139C_c1	499	501	502	561	557	492	503	535	495	506	507	522	528	521	425	496	454	531	507	518	538	501	563	563	489	512	508	524	498	526	521	498	562	511	530	541	542	501	507	539	507	500	498	488	514	506	518	513	488
r3-T69_GQ861437.1_p135040_c121	389	376	322	493	519	305	295	510	468	326	322	378	415	356	330	460	300	502	320	348	459	334	494	493	395	311	381	382	389	387	353	315	494	379	485	508	511	383	392	510	357	299	452	438	360	316	301	341	428
r3-T55_NZ_CP046297.1_FDAARGOS_552_plasmid_unnamed2_A_lwoffii	473	481	488	527	574	459	463	549	375	483	464	464	487	467	428	489	420	555	463	494	4	488	527	527	506	456	472	481	474	476	467	472	524	486	508	568	568	486	507	565	485	461	478	480	485	474	456	472	446
r3-T160_NZ_CP089049.1_pRIVM_C010761_6_A_ursingii	422	382	371	465	518	335	243	507	476	320	336	380	424	327	369	484	334	496	332	391	446	375	467	465	421	222	391	389	418	373	326	349	466	410	487	515	515	388	414	512	338	205	476	467	373	352	332	387	444
r3-T7_CP041149.1_pCUVET596_c6	547	522	508	557	360	516	513	333	543	514	517	519	530	508	478	539	444	343	515	509	566	510	557	555	532	501	508	538	546	529	510	493	559	515	536	20	16	506	522	18	496	499	533	524	515	493	498	531	468
r3-T45_NZ_CP026426.1_pACI-df08_Acinetobacter_sp	526	511	507	554	226	499	510	40	530	511	513	511	531	500	442	530	460	122	513	506	546	519	550	550	532	499	504	535	523	527	500	496	553	516	519	329	331	497	529	329	513	490	521	524	538	503	505	536	472
r3-T20_NZ_CP041290.1_p94-2-tetX3_A_indicus	499	500	502	558	554	492	503	534	495	506	507	522	526	521	425	495	454	530	507	518	537	501	561	561	489	512	508	524	498	526	521	498	560	510	531	539	540	502	508	537	507	500	498	487	515	506	518	513	486
r3-T118_NZ_CP010354.1_pXBB1-3_A_johnsonii	459	438	429	505	505	431	456	494	488	448	433	448	400	449	396	270	383	490	430	447	470	428	503	505	444	442	449	462	458	460	452	439	504	433	381	499	498	453	458	496	432	419	232	251	453	428	418	443	448
r3-T8_NZ_CP032127.1_p1_010005_A_chinensis	469	450	442	507	537	450	488	520	480	458	457	466	421	442	405	163	381	515	453	452	480	439	509	509	476	473	458	481	472	488	444	450	507	438	391	538	537	454	459	537	450	462	11	165	465	428	452	468	459
r3-T108_NZ_CP113450.1_pC9_8_A_baumannii	443	421	321	488	544	317	338	539	502	387	330	401	460	357	376	475	318	525	331	389	511	333	489	487	429	362	414	335	440	413	358	313	488	415	481	536	537	407	403	535	406	356	475	466	316	313	331	437	453
r3-T124_NZ_CP016898.1_pGFJ2_A_soli	513	515	530	560	552	525	514	545	534	519	517	525	547	535	435	529	492	545	517	524	543	540	561	561	522	534	536	521	509	529	535	526	563	516	547	561	560	526	521	560	532	519	524	526	527	536	523	540	492
r3-T94_NZ_CP019145.1_pZS-3_A_lwoffii	531	510	499	546	543	517	512	534	498	518	515	509	526	516	464	523	451	519	513	528	528	507	548	546	493	521	489	532	532	509	515	521	547	528	529	528	528	501	519	526	516	514	506	516	505	515	525	523	465
r3-T51_CM009050.2_p4ZQ2_c55	454	433	377	469	541	392	341	533	469	387	391	424	451	393	382	486	360	534	386	431	488	387	470	471	442	389	435	429	449	428	395	374	468	450	515	544	544	427	436	541	394	367	477	469	415	378	381	442	469
r3-T24_NZ_CP113446.1_pC9_4_A_baumannii	430	374	350	460	524	332	315	505	483	317	329	368	436	28	380	465	314	496	327	358	478	360	461	460	417	323	397	396	423	393	26	327	461	392	477	514	513	365	371	511	313	325	441	441	381	330	347	409	447
r3-T164_NZ_CP015147.1_pIEC338SC2_A_pittii	446	401	390	477	527	368	296	514	474	350	372	424	443	364	374	497	346	510	372	405	491	401	475	476	431	269	424	397	441	381	362	369	476	414	489	529	529	410	405	526	360	256	494	473	396	368	385	431	444
r3-T95_NZ_CP032124.2_pALWED2.9_A_lwoffii	439	386	407	492	542	400	355	540	511	394	404	407	439	408	382	473	378	541	398	413	482	410	489	490	462	345	418	440	433	431	413	395	493	427	471	539	538	384	464	536	379	351	475	474	438	403	360	131	470
r3-T47_CP042565.1_pE47_009_c18	433	433	320	481	536	314	331	523	488	393	350	411	446	372	360	485	322	533	347	391	485	319	483	484	420	342	409	344	429	395	376	331	482	414	481	529	528	438	405	526	413	333	481	469	335	320	340	420	431
r3-T95_NZ_CP055281.1_pBspH13_Acinetobacter_sp	434	386	405	492	543	402	352	535	512	394	404	409	436	402	380	481	378	537	398	412	478	409	489	490	456	339	416	442	428	431	409	392	493	426	470	537	536	384	462	534	373	347	473	469	437	403	354	131	472
r3-T111_NZ_ON109139.1_pALK1_A_lwoffii	474	466	478	534	575	452	462	541	383	471	458	469	471	470	432	480	410	544	455	490	121	481	534	534	508	449	473	489	472	484	468	475	532	485	509	558	558	480	505	556	469	453	475	473	493	465	454	477	453
r3-T196_NZ_CP035941.1_p6_060092_A_cumulans	393	376	313	460	513	282	303	498	468	325	303	365	410	331	333	466	292	497	299	349	451	315	460	458	402	309	381	349	390	395	328	287	459	374	489	510	510	381	396	511	353	304	457	454	350	303	330	362	423
r3-T33_NZ_CP015620.1_p5AsACE_A_schindleri	434	171	382	480	522	368	391	501	476	371	365	330	454	357	377	457	332	505	358	361	483	396	480	481	442	369	350	448	433	439	362	371	482	441	498	512	510	16	450	510	353	359	450	449	427	363	400	400	465
r3-T40_NZ_CP054825.1_FDAARGOS_551	420	372	360	456	515	326	215	510	453	315	336	381	428	317	363	467	323	503	331	371	469	361	457	456	413	195	386	389	415	377	319	337	457	417	474	514	514	378	404	512	323	192	473	450	382	342	303	374	429
r3-T4_CP095092.1_AB4451	427	362	343	502	514	309	361	513	483	340	323	337	407	349	371	462	322	499	325	145	473	355	500	499	431	358	379	407	423	402	349	307	500	229	473	522	520	363	412	519	355	359	447	448	384	335	350	399	448
r3-T8_AY228470.1_pAB02_c118	469	450	445	506	528	444	480	517	481	452	451	458	418	444	408	166	380	512	447	455	471	438	507	508	471	466	453	487	470	489	447	448	507	443	393	535	534	449	458	534	450	455	42	163	470	429	450	460	456
r3-T106_NZ_CP077341.1_FDAARGOS_1393_plasmid_unnamed5_A_lwoffii	454	390	450	517	555	454	445	548	504	463	448	419	459	444	395	486	401	541	447	432	509	434	518	518	460	451	414	447	454	463	443	422	518	446	506	541	540	373	452	539	448	443	473	479	444	430	434	443	483
r3-T1_NZ_CP044452.1_pMMS9-2-2_A_indicus	416	372	296	469	528	17	321	499	459	310	207	335	418	324	354	455	268	503	208	314	461	290	470	469	411	325	372	325	414	403	321	248	470	368	464	522	521	372	407	518	326	315	449	442	314	266	308	394	435
r3-T155_NZ_CP032115.1_pALWED1.6_A_lwoffii	415	384	334	463	516	311	216	501	470	277	327	372	422	323	364	476	312	490	325	367	473	347	461	460	418	261	375	367	412	373	329	309	462	397	485	493	496	375	382	493	281	258	474	453	378	322	307	372	443
r3-T10_CP051871.1_pAb-D10a-a_2_c115	458	448	447	495	527	441	459	522	485	450	441	453	425	434	395	160	392	519	437	452	478	443	496	496	465	454	450	481	459	472	444	449	493	427	378	524	523	455	448	523	462	448	164	3	469	441	431	465	446
r3-T30_CP050420.1_pPM193665_5_c17	424	412	373	454	534	367	239	508	490	318	368	418	421	351	364	464	356	505	366	378	466	380	453	454	409	287	409	390	422	346	355	357	453	396	482	516	515	416	389	512	328	287	475	456	385	382	341	397	421
r3-T24_CP034097.1_pA52-OXA-72_c68	436	378	351	457	515	331	310	501	480	319	327	379	436	33	389	462	309	492	323	358	464	356	458	456	417	318	396	397	429	396	31	328	458	400	481	512	511	362	367	509	323	326	436	431	388	326	345	408	449
r3-T184_NZ_CP044481.1_pHZE33-1-7_A_schindleri	423	359	352	461	507	314	218	494	473	308	328	366	424	321	370	463	327	499	324	361	470	359	461	461	421	93	381	392	419	365	326	315	459	408	473	502	503	363	400	501	309	100	468	441	369	346	289	367	440
r3-T182_NZ_CP039150.1_p10FS3-1-7_Acinetobacter_sp	456	196	388	491	528	364	397	505	473	367	358	292	447	383	391	467	328	508	356	384	482	404	489	488	455	358	358	446	459	438	383	365	491	437	492	513	513	175	468	512	360	359	457	465	419	361	404	406	471
r3-T21_CP026129.1_pABA-2f10_c8	524	509	509	552	238	502	513	117	536	505	502	515	535	493	446	528	455	18	499	500	555	520	550	549	534	511	506	530	522	542	495	502	552	507	533	341	341	507	522	339	512	500	512	520	523	500	501	541	476
r3-T95_NZ_CP068186.1_FDAARGOS_1094_plasmid_unnamed2_A_johnsonii	434	388	405	492	543	403	353	535	513	395	405	409	439	402	377	483	381	539	399	414	480	413	489	490	454	344	417	443	428	429	409	393	493	426	469	540	539	386	462	537	375	351	475	470	435	407	358	134	471
r3-T93_NZ_CP080639.1_pALWEK1.5_A_lwoffii	437	372	341	453	537	316	282	515	489	143	307	375	417	313	372	459	317	502	303	345	491	356	450	451	434	317	393	401	434	380	316	352	450	395	494	513	513	368	395	511	206	312	464	456	386	333	362	400	439
r3-T2_NC_012813.1_pABVA01_c43	430	368	273	462	525	199	322	513	484	315	9	347	430	327	362	457	250	496	9	336	465	277	462	461	425	338	374	327	430	410	326	245	461	372	461	523	522	363	405	519	331	321	451	437	335	249	324	405	438
r3-T7_NZ_CP010358.1_pXBB1-8_A_johnsonii	548	522	512	560	357	521	514	335	544	514	520	520	533	508	480	540	447	343	518	508	565	513	560	558	531	497	510	538	545	532	508	495	560	517	533	22	18	507	525	20	501	503	536	527	512	496	499	533	469
r3-T7_NZ_CP089053.1_pRIVM_C010559_2_A_ursingii	549	522	512	559	357	518	515	334	542	516	520	519	532	509	480	539	448	342	518	509	566	514	559	557	530	498	509	537	546	532	509	494	561	515	533	18	14	507	523	16	499	502	536	526	512	497	501	532	469
r3-T3_CP026128.1_pABA-1fe1_c24	454	496	480	5	566	468	442	558	519	450	459	480	496	452	386	503	449	546	455	497	527	499	10	5	474	457	488	496	456	479	456	466	6	484	525	555	554	482	466	552	470	439	507	494	483	492	468	487	492
r3-T43_NZ_CP089055.1_pRIVM_C010559_4_A_ursingii	413	360	128	484	525	256	321	502	481	323	247	361	415	336	351	460	113	502	242	335	477	147	483	485	396	333	363	337	411	386	340	273	485	398	467	502	502	354	413	499	338	322	444	443	332	89	298	392	431
r3-T80_NZ_CP048661.1_pYH12207-2_A_piscicola	3	441	405	451	545	425	425	527	516	432	430	436	459	428	19	468	377	521	429	421	471	411	453	454	309	431	415	425	22	428	433	405	453	432	480	547	545	442	419	546	431	426	470	456	426	406	413	440	440
r3-T41_NC_010398.1_p3ABSDF_c35	433	397	398	482	545	392	364	533	495	391	398	406	437	401	381	484	363	529	396	402	478	408	480	481	453	365	418	440	431	443	404	391	480	437	458	532	531	389	441	528	380	360	466	457	435	391	347	184	463
r3-T2_AP024807_pOCUAc18-5	428	367	274	461	521	182	321	509	485	318	15	347	428	326	363	455	251	496	23	336	466	280	461	460	418	342	374	328	428	408	326	247	462	378	461	516	515	364	408	512	335	321	454	440	333	250	322	406	441
r3-T7_NZ_CP038025.1_pAR3_A_radioresistens	548	524	513	559	355	519	516	328	542	518	518	522	530	511	480	535	449	339	516	513	568	513	559	557	530	498	511	540	545	530	513	494	561	520	536	16	12	511	522	14	498	502	534	523	515	498	498	534	469
r3-T28_CP047975.1_pDETAB2_c62	310	434	401	471	550	416	410	532	506	419	422	443	465	410	268	463	370	530	420	419	504	414	473	474	4	430	428	437	305	429	416	409	473	416	490	533	533	439	401	531	406	408	471	463	423	402	423	450	457
r3-T43_NZ_CP045102.1_pAJ210_A_johnsonii	412	377	137	482	534	267	320	509	477	330	250	361	418	333	349	459	120	508	246	342	478	153	482	483	397	340	365	336	410	396	336	278	483	394	466	507	507	355	409	504	352	329	444	441	328	92	304	398	429
r3-T173_NZ_CP055290.1_pBspH8_Acinetobacter_sp	456	349	392	496	523	359	398	505	484	383	366	260	442	393	392	473	345	502	366	380	489	404	495	494	439	381	261	438	458	431	391	360	496	430	492	517	519	352	442	516	369	380	472	458	426	376	397	417	457
r3-T100_NZ_CP010351.1_pXBB1-9_rep2_A_johnsonii	462	451	433	503	508	428	455	489	475	442	429	442	437	442	409	398	385	497	430	442	464	425	505	503	450	442	431	453	460	482	439	427	504	447	432	498	500	445	447	497	459	434	401	402	461	430	442	441	433
r3-T84_NZ_CP010353.1_pXBB1-2_A_johnsonii	420	372	345	447	508	325	224	493	485	307	324	375	418	310	368	469	326	498	321	363	468	358	445	445	407	113	375	403	419	370	316	320	446	403	478	505	506	351	395	503	314	32	464	444	367	348	303	364	435
r3-T76_NZ_CP087302.1_p2OC061_A_baumannii	467	457	458	501	530	450	484	524	478	451	452	458	408	462	403	23	393	520	451	469	487	452	503	504	460	464	461	483	465	489	471	458	502	440	403	537	538	462	472	536	467	460	154	155	488	448	440	465	444
r3-T6_NZ_AYFH01000048.1_pABUH3a-8.2_c76	451	462	445	496	533	439	467	527	473	450	432	460	413	453	386	173	382	521	428	461	479	440	497	497	478	449	452	470	453	473	456	444	495	440	387	524	523	474	468	521	456	445	181	130	465	436	435	454	451
r3-T1_CP012955.1_pD36-3_c40	425	369	294	470	528	2	323	499	455	311	197	335	419	329	358	453	269	500	197	316	460	289	471	470	419	327	372	324	422	403	326	250	471	369	460	520	519	373	407	516	327	316	446	440	314	267	312	397	430
r3-T123_NZ_CP084302.1_pXMC5X702-tetX-145k_A_pseudolwoffii_rep1	498	526	515	574	570	504	513	539	521	514	522	523	556	519	418	536	479	542	524	524	570	514	575	576	499	531	515	521	494	524	522	503	574	533	535	544	545	522	527	544	501	520	515	521	530	516	536	529	492
r3-T52_CP053216.1_p2DT0544C_c56	422	438	380	471	550	391	342	543	492	329	383	426	436	394	361	483	375	546	382	402	505	361	471	471	418	359	410	400	419	374	392	383	471	409	483	540	539	414	401	537	342	349	482	462	400	400	409	434	437
r3-T53_CP030107.1_pDA33382-2-2_c59	431	414	333	479	545	298	347	538	478	381	335	399	440	358	365	465	325	527	335	394	492	341	482	480	423	359	415	339	426	429	360	314	481	414	484	543	542	413	396	539	394	350	459	457	329	327	340	430	457
r3-T84_NZ_CP041298.1_p80-1-2-p4_A_indicus	424	383	348	447	518	325	228	499	479	312	333	383	421	322	372	475	319	503	329	363	466	355	446	445	413	118	381	404	424	366	325	332	446	411	487	505	506	367	401	504	319	38	464	454	369	343	268	348	437
r3-T70_AP024808_pOCUAc18-6	431	383	345	459	524	317	210	510	477	289	334	376	425	328	371	467	326	496	329	371	470	352	457	456	420	258	383	371	425	372	332	317	459	402	489	507	508	379	379	505	299	245	475	452	379	339	312	367	442
r3-T15_NZ_CP032123.1_pALWED2.8_A_lwoffii	411	391	315	469	518	315	295	506	462	366	330	392	422	348	357	445	306	504	329	359	450	323	467	467	425	298	387	385	411	380	350	302	467	417	474	503	504	400	396	502	361	284	448	430	372	306	25	340	440
r3-T166_NZ_CP048662.1_pYH12207-3_A_piscicola_rep1	515	479	483	526	567	470	474	537	276	490	477	471	486	489	442	492	434	527	478	501	391	477	522	523	508	481	477	474	515	502	488	466	526	486	511	541	541	483	508	538	492	476	480	480	501	480	462	502	458
r3-T77_NZ_CP041294.1_p80-1-2-p3_A_indicus	520	509	510	542	553	523	516	547	504	521	524	512	529	537	456	526	462	535	521	530	520	515	542	542	495	517	482	529	524	513	534	527	541	523	531	531	531	507	511	530	517	516	507	523	504	516	520	528	471
r3-T137_NZ_CP035942.1_p7_060092_A_cumulans	424	442	329	481	513	330	387	505	495	388	337	423	450	395	362	478	333	493	334	394	486	353	481	482	423	379	425	319	426	434	397	333	482	408	435	500	500	432	395	499	411	372	477	483	254	331	390	448	438
r3-T14_CP033871.1_p597A-14.8_c93	418	383	295	482	513	254	326	497	482	321	266	359	423	335	356	459	278	493	261	336	472	289	480	479	410	327	374	330	415	393	336	215	481	385	475	511	511	384	390	509	340	318	443	440	327	282	322	391	434
r3-T14_NZ_CP039149.1_p10FS3-1-6_Acinetobacter_sp	418	382	295	481	514	255	324	496	483	321	264	358	422	333	356	459	276	492	259	336	470	288	479	478	411	326	375	327	415	391	334	215	480	384	473	510	510	383	390	508	339	317	441	440	325	280	320	389	433
r3-T187_NZ_CP031715.1_p7_010060_A_wuhouensis	426	378	360	451	513	326	233	494	475	301	332	373	418	326	365	468	324	499	328	377	462	364	452	451	417	108	393	401	422	376	329	311	451	405	478	498	499	364	400	496	306	112	454	454	374	346	311	370	444
r3-T31_NZ_CP019152.1_pZS-20_A_lwoffii	404	390	276	465	509	250	324	499	482	326	245	346	425	323	345	456	279	496	243	321	474	293	465	464	409	323	353	339	404	393	323	8	467	370	466	494	493	373	378	493	354	319	451	451	332	280	298	395	437
r3-T90_NZ_CP076604.1_MCDA01_plasmid_unnamed_A_schindleri	525	515	502	550	228	495	506	78	536	504	507	509	523	495	442	524	459	123	505	506	548	519	546	546	536	500	507	533	525	528	496	492	549	511	522	322	324	507	525	322	510	489	517	519	531	505	501	522	473
r3-T43_NZ_CP032270.1_p2_010034_Acinetobacter_sp	407	380	123	477	536	265	322	509	476	330	245	367	414	333	349	461	129	509	241	339	477	148	477	478	402	340	345	331	404	406	336	277	478	397	457	507	507	352	411	504	339	329	444	439	320	102	304	396	434
r3-T148_NZ_CP048664.1_pYH12207-5_A_piscicola	423	394	282	476	527	245	327	513	472	335	240	362	416	330	362	474	281	504	235	334	477	285	473	473	413	331	369	323	422	420	332	223	476	381	472	513	513	378	390	512	347	328	455	450	323	276	321	399	443
r3-T82_NZ_ALIG01000010.1_pAV3_rep1_A_venetianus	504	516	512	565	564	492	511	532	519	507	522	512	548	520	426	533	479	535	524	521	575	516	566	567	494	526	513	528	498	521	523	502	565	528	530	529	530	523	523	530	496	510	515	516	528	516	536	520	502
r3-T99_NZ_CP035939.1_p4_060092_A_cumulans	409	379	305	454	504	255	330	495	486	330	256	359	425	336	343	468	278	493	253	339	460	299	451	450	412	328	385	321	406	386	336	223	453	391	475	516	518	368	398	517	351	321	453	443	329	289	322	385	450
r3-T86_NZ_CP045100.1_pAJ14_A_johnsonii	435	43	393	496	517	375	384	509	486	368	376	321	446	354	376	460	333	499	371	371	478	395	495	496	432	360	345	451	433	433	364	374	495	426	489	517	517	169	454	516	351	366	448	443	424	371	396	398	454
r3-T3_CP018333.1_pA1296_1_c23	456	497	480	5	566	470	441	560	517	450	460	480	495	453	387	503	448	547	456	499	528	500	12	5	475	459	488	496	458	480	457	466	10	484	523	555	554	483	469	552	471	441	507	495	484	492	469	487	492
r3-T27_CP034094.1_pA52-2_c60	446	463	405	501	538	427	390	535	526	393	423	462	438	400	372	479	395	536	424	425	522	400	501	501	424	379	440	433	444	378	400	410	502	407	489	530	528	461	362	527	404	394	455	461	428	413	409	464	452
r3-T84_NZ_CP032282.1_p3_010055_Acinetobacter_sp_rep2	423	379	349	447	515	324	224	496	477	312	330	382	423	320	370	473	319	500	326	362	464	354	445	445	412	114	383	400	422	364	323	330	447	410	485	503	504	366	403	502	315	34	465	454	369	342	270	345	436
r3-T39_NC_010396.1_p2ABSDF_c34	468	468	460	529	543	460	469	532	443	473	460	466	476	471	409	427	415	523	457	482	494	465	531	529	471	467	472	469	465	500	468	459	531	482	456	532	533	462	482	530	475	453	422	422	476	463	470	472	452
r3-T134_NZ_MK944318.1_pAVAci145_A_lwoffii	516	517	514	517	569	490	501	555	497	490	503	499	510	504	443	514	464	553	498	500	484	523	516	516	526	487	489	514	512	520	504	503	515	506	512	565	566	529	501	563	502	489	499	491	513	515	509	501	475
r3-T20_NZ_CP038024.1_pAR2_A_radioresistens	500	500	502	551	550	494	503	530	494	506	509	522	526	520	426	497	454	526	509	518	535	501	554	554	488	512	508	525	499	527	521	500	554	512	530	535	536	502	510	533	507	500	498	487	513	505	517	512	487
r3-T45_NZ_CP090865.1_pNDM_SCLZS86_Acinetobacter_sp	528	517	506	559	226	503	514	6	535	514	513	515	535	497	446	529	457	113	513	511	549	521	555	555	534	499	505	537	527	534	499	498	558	521	522	326	328	500	525	326	515	491	515	522	537	501	505	534	475
r3-T79_NZ_CP031997.1_pAhaem2126cha_A_haemolyticus	437	456	371	481	538	367	391	538	493	386	379	448	461	403	372	485	360	533	378	426	478	373	480	479	431	390	444	388	436	427	402	372	481	423	475	517	518	451	395	516	411	393	495	496	376	367	366	445	454
r3-T31_NZ_CP048677.1_pYH12138-7_Acinetobacter_sp	410	390	274	470	511	251	318	505	481	327	247	350	429	327	350	456	277	498	245	326	473	293	471	471	414	323	353	340	412	397	328	24	473	372	464	501	500	369	388	500	356	320	453	449	335	280	299	393	433
r3-T5_NZ_CP087330.1_p2OC074_A_baumannii	406	398	2	483	527	295	336	508	487	344	277	376	421	348	352	464	165	510	274	352	489	130	481	482	405	358	334	334	403	402	350	272	484	397	480	513	513	386	410	510	355	346	446	447	333	141	308	391	431
r3-T3_CP032217.1_p2UPAB1_c27	455	498	483	11	567	471	445	560	517	451	461	484	498	452	386	502	451	550	457	499	527	503	20	13	472	456	492	497	460	483	456	467	16	484	522	552	551	483	471	549	474	440	508	496	483	495	469	490	492
r3-T186_NZ_CP018142.1_pRW2_A_larvae	418	387	213	473	515	285	349	513	489	346	261	364	407	345	362	463	245	506	259	341	478	232	474	474	421	344	371	321	414	393	347	277	473	384	470	498	498	385	396	496	349	350	453	434	313	228	323	401	428
r3-T50_CP046900.1_pA1429b_c37	402	370	345	447	523	319	299	508	466	206	331	372	404	315	341	444	312	502	328	349	480	339	446	445	405	313	368	412	396	370	320	343	445	383	495	505	503	380	391	503	186	315	443	435	396	335	344	389	435
r3-T97_NZ_MN481287.1_pA2949_A_pittii	414	419	344	489	536	357	377	528	495	379	360	415	449	377	360	468	347	521	358	388	497	349	492	492	416	392	393	377	412	400	380	328	492	389	493	526	525	424	394	523	386	382	450	441	377	346	382	448	435
r3-T98_NZ_CP015112.1_TGL-Y2_plasmid_unnamed2_Acinetobacter_sp	468	458	460	489	533	446	480	519	486	440	454	454	417	441	406	160	399	516	451	462	489	452	490	492	469	457	457	481	471	480	451	452	488	440	402	531	532	457	463	530	462	451	176	143	475	447	442	473	451
r3-T62_NZ_CP077373.1_FDAARGOS_1394_plasmid_unnamed4_A_lwoffii_rep1	410	397	126	502	529	291	341	522	492	352	280	381	406	356	356	453	166	517	277	345	487	2	499	501	414	365	345	337	406	396	351	289	500	385	483	515	515	396	418	514	359	356	444	443	335	141	316	395	424
r3-T21_CP026749.2_pOXA58_005133_c9	524	510	508	549	235	501	510	114	534	504	500	512	535	491	446	528	455	14	497	499	553	519	547	546	535	510	503	529	522	542	493	499	549	507	533	336	336	506	520	334	513	499	512	518	524	499	501	540	476
r3-T13_NZ_CP077374.1_FDAARGOS_1394_plasmid_unnamed5_A_lwoffii	423	364	349	499	519	308	372	510	502	335	330	369	424	353	366	470	322	499	329	19	496	344	502	502	422	370	382	401	417	396	351	317	500	222	469	519	517	358	412	517	353	368	450	452	381	333	360	402	461
r3-T27_NZ_CP103340.1_AB105_plasmid_unnamed3_A_baumannii	449	465	403	497	539	424	388	537	525	393	422	460	434	396	375	475	398	535	423	426	523	399	497	497	426	375	436	437	447	382	393	405	498	404	487	528	526	460	363	525	405	393	454	458	427	415	408	465	451
r3-T79_NZ_CP031983.1_pAhaemAN4a_A_haemolyticus	437	457	370	481	538	366	389	538	494	385	378	448	461	402	371	485	359	533	377	428	478	372	480	479	429	392	443	387	436	427	401	372	481	423	476	519	520	452	395	518	410	395	495	496	372	366	366	445	453
r3-T77_NZ_AP019744.1_pARA4_A_radioresistens	519	511	510	541	550	524	515	549	503	524	525	514	529	539	455	525	464	537	524	528	520	516	543	541	495	520	482	529	523	515	536	526	542	523	532	532	532	509	511	531	520	519	509	523	505	518	521	530	471
r3-T150_NZ_CP044479.1_pHZE33-1-5_A_schindleri	427	379	293	469	522	60	316	502	460	312	182	337	416	336	358	452	263	499	182	321	456	291	470	469	429	323	363	322	427	400	334	257	470	375	458	513	512	365	403	509	320	315	444	443	314	263	308	394	420
r3-T135_NZ_CP039151.1_p10FS3-1-8_Acinetobacter_sp	537	524	521	543	563	518	513	566	506	505	523	499	526	509	467	516	455	554	523	532	507	529	541	541	517	528	500	540	538	525	509	527	541	527	528	552	552	518	537	550	514	523	509	513	507	525	517	540	480
r3-T23_CP050406.1_pVB2486_3_c110	457	442	435	511	510	433	460	508	488	448	444	451	408	456	394	267	389	505	441	450	469	426	510	512	446	453	454	470	454	467	455	448	511	437	379	512	514	447	450	512	438	435	249	248	464	429	425	449	450
r3-T144_NZ_CP078029.1_pAV_175-3_A_variabilis	477	466	451	504	530	460	450	521	457	445	468	457	463	453	422	468	418	521	465	452	473	465	501	501	463	462	449	482	476	466	454	453	507	444	492	519	519	469	453	517	441	445	450	449	464	464	473	471	443
r3-T85_NZ_CP019151.1_pZS-13_A_lwoffii	432	367	358	460	519	329	234	498	472	317	341	369	414	320	376	468	334	507	335	365	456	367	460	460	429	2	385	391	429	369	323	326	460	407	481	500	501	370	404	498	313	101	478	457	375	350	305	360	444
r3-T20_CP051870.1_pAb-D10a-a_1_c0	499	500	502	560	555	492	503	535	495	506	507	522	527	521	425	495	454	531	507	518	537	501	563	564	489	512	508	525	498	526	521	498	562	511	530	539	540	502	507	537	507	500	498	487	514	506	518	513	486
r3-T12_CM009030.2_p1ZQ10_c48	429	373	259	458	514	179	319	498	482	314	70	342	427	323	361	454	247	485	70	328	464	270	458	457	424	341	359	325	427	398	324	242	459	368	458	510	509	362	404	506	332	324	449	438	327	240	313	399	440
r3-T27_CP051864.1_pAb-C102_2_c61	445	464	406	500	539	428	390	536	527	394	424	463	437	401	371	480	396	537	425	426	523	401	500	500	423	380	441	434	443	379	401	411	501	407	490	531	529	462	363	528	404	395	456	462	429	414	408	464	451
r3-T81_NZ_CP031712.1_p4_010060_A_wuhouensis_rep2	516	490	485	522	560	476	478	541	212	501	491	476	493	487	451	487	431	533	491	519	388	479	522	523	507	473	480	478	512	512	484	481	523	497	528	537	537	503	492	535	492	474	485	479	511	480	473	510	455
r3-T12_NZ_AFDA02000011.1_pNaval18-7.0_c50	430	373	265	463	514	186	326	501	482	318	57	344	435	326	361	459	253	486	55	336	472	275	463	462	430	343	369	328	430	408	328	250	462	372	460	514	513	365	411	510	334	329	454	440	327	246	323	403	439
r3-T24_NZ_CP042367.1_pC54_003_A_pittii_rep1	427	375	346	458	517	327	310	502	482	317	329	373	434	25	379	466	310	490	327	352	466	353	459	458	416	313	392	400	421	400	25	324	459	396	475	513	512	359	374	510	314	317	438	437	383	326	342	401	443
r3-T99_NZ_CP045136.1_pXG01-X3_A_indicus	408	378	297	454	504	258	324	495	488	327	251	352	431	332	341	467	276	494	248	336	462	288	451	450	413	330	378	323	405	386	332	214	453	390	473	513	515	365	395	514	343	319	454	444	319	284	317	382	449
r3-T181_NZ_CP029389.2_p1_010030_A_defluvii	415	430	399	463	521	398	384	516	503	377	402	454	421	348	356	474	378	523	400	413	504	395	464	466	416	387	436	405	417	399	353	393	463	403	499	505	504	431	369	503	392	384	469	459	404	404	386	447	420
r3-T1_CP015486.1_pORAB01-3.1_c41	426	371	289	463	530	26	321	500	458	313	187	337	421	332	356	457	265	499	189	310	453	289	464	463	421	323	368	315	423	402	331	243	464	363	459	520	519	371	404	516	328	314	446	442	312	263	315	396	430
r3-T31_NZ_CP103341.1_AB105_plasmid_unnamed4_A_baumannii_rep2	404	391	270	467	512	248	324	504	483	325	247	346	424	321	346	457	274	500	245	320	473	288	467	467	409	324	354	339	404	395	322	4	469	371	467	497	496	373	381	496	350	320	451	451	333	275	298	392	432
r3-T15_NZ_MK944322.1_pAVAci176_A_lwoffii	413	392	307	471	517	314	297	506	461	362	326	386	417	340	360	445	302	502	325	355	450	318	469	469	421	296	379	380	413	374	341	297	469	412	473	501	502	395	390	500	356	282	452	430	364	302	11	337	436
r3-T11_NZ_CP015619.1_p4AsACE_A_schindleri	415	383	294	475	513	258	327	495	484	333	260	351	423	331	348	456	279	493	258	345	482	288	472	471	418	331	374	337	411	383	335	210	476	377	489	500	500	369	394	499	348	326	449	455	325	284	325	389	434
r3-T158_NZ_CP044489.1_pHZE30-1-6_A_schindleri	440	398	394	522	541	375	335	530	487	386	381	380	449	418	386	467	353	522	377	397	481	394	519	519	439	350	385	438	436	441	417	365	522	440	490	524	523	388	463	521	392	337	471	452	423	386	326	346	453
r3-T97_NZ_CP061597.1_pAS59-1_A_seifertii	413	419	342	477	537	350	370	526	489	378	355	415	440	379	362	467	343	526	353	383	493	347	480	480	414	395	396	377	407	391	383	327	480	387	489	524	525	418	388	523	381	383	455	442	379	343	381	452	431
r3-T61_CP059302.1_pAC1633-4_c87	441	371	353	460	534	335	220	512	467	331	333	377	426	333	382	476	316	520	331	378	463	351	458	456	425	185	382	374	437	372	335	326	461	415	455	510	510	386	416	507	313	172	461	452	355	340	301	358	435
r3-T25_NZ_CP032290.2_pALWED3.6_A_lwoffii	524	517	506	553	230	502	515	24	534	515	514	515	535	499	442	533	460	117	514	510	550	523	549	549	535	501	505	534	522	531	500	499	552	518	521	328	330	497	526	328	516	494	520	527	536	503	505	534	475
r3-T133_NZ_CP032276.1_p8_010034_Acinetobacter_sp	489	526	473	550	557	498	494	539	484	484	489	495	507	517	418	480	439	543	485	503	535	476	549	550	478	515	481	461	490	530	517	488	546	485	495	542	543	527	516	542	494	505	481	470	485	476	482	516	458
r3-T25_NZ_AP024709.1_pTol5_Acinetobacter_sp	536	520	504	554	231	505	512	62	539	508	519	512	531	491	453	526	457	108	519	507	549	519	550	550	545	499	504	534	533	528	494	497	553	506	521	331	333	504	525	329	512	492	514	522	539	506	504	528	473
r3-T17_NZ_CP048657.1_pC15-3_A_indicus_rep1	445	182	391	479	522	320	375	506	459	339	348	325	433	359	380	468	328	503	345	374	466	395	479	478	435	355	364	445	445	441	358	366	480	423	487	503	503	176	454	502	326	346	455	461	421	365	388	379	466
r3-T7_NZ_ALIG01000010.1_pAV3_rep2_A_venetianus	545	522	514	561	356	520	517	327	544	518	518	521	531	510	477	537	451	338	516	514	568	514	561	559	527	499	510	541	545	530	512	495	563	521	538	19	17	508	521	19	497	499	534	523	515	499	498	534	470
r3-T176_NZ_CP084310.1_pXMC5X702-4.4k_A_pseudolwoffii	441	420	380	471	514	370	279	513	467	330	382	412	447	354	367	485	371	499	379	401	481	387	471	471	429	326	414	393	444	366	355	371	473	412	494	515	516	421	399	513	336	303	471	463	394	379	371	430	445
r3-T153_NZ_CP020001.1_pCA16_A_calcoaceticus	443	390	442	500	562	444	448	552	488	431	448	409	467	438	384	479	396	549	445	440	517	439	499	501	436	457	404	466	447	424	437	432	497	436	514	549	548	376	429	545	417	440	472	471	450	432	441	438	475
r3-T1_CP099794.1_NCCP_16006	426	370	295	472	530	1	325	501	453	311	198	336	420	332	359	455	269	502	198	315	460	291	473	472	419	327	372	325	423	404	329	250	473	368	463	521	520	375	407	517	327	316	448	442	315	267	313	398	432
r3-T188_NZ_CP032119.1_pALWED2.4_A_lwoffii	451	356	385	494	525	365	384	498	475	361	382	203	428	408	384	473	344	504	379	397	465	390	494	493	444	360	211	420	454	435	407	370	494	433	494	518	517	357	438	514	381	378	471	460	419	372	396	412	456
r3-T167_NZ_CP087338.1_p3DB053_A_baumannii	425	447	410	462	546	401	400	532	514	377	395	426	434	401	365	466	371	538	398	395	509	390	466	465	416	410	416	410	425	403	397	381	463	399	500	530	532	447	269	530	395	401	456	447	399	390	404	441	460
r3-T63_NZ_CP084302.1_pXMC5X702-tetX-145k_A_pseudolwoffii_rep2	416	447	409	472	540	393	402	525	493	376	408	445	438	370	357	464	375	536	403	414	506	405	475	476	397	392	435	420	413	393	370	373	476	394	484	531	531	443	118	530	406	381	451	449	399	392	394	453	471
r3-T32_GU979000.1_p1121_c94	436	421	396	491	529	367	423	520	507	384	374	435	427	394	373	438	378	509	376	228	492	383	490	491	417	408	429	415	427	403	398	372	493	13	472	520	520	444	387	518	404	409	435	427	399	392	413	437	444
r3-T68_KY984046.1_pAb242_12_c112	436	419	393	481	532	387	419	522	484	400	398	421	407	387	376	407	362	523	395	400	479	393	481	481	422	428	426	429	433	417	392	391	481	390	498	530	529	422	434	528	391	417	411	417	421	394	403	435	428
r3-T6_CM009030.2_p1ZQ10_c74.1	448	459	445	497	533	438	466	527	474	448	430	460	413	450	383	169	382	520	426	461	480	442	498	498	476	448	452	468	450	471	453	442	498	439	384	525	524	472	467	522	458	442	181	128	465	436	433	451	452
r3-T104_NZ_CP038011.1_pAHTJR2_A_haemolyticus	477	462	448	490	493	446	465	493	448	450	447	470	482	478	464	474	381	490	445	469	432	458	488	488	470	461	468	459	476	454	475	474	487	464	489	491	491	462	473	489	462	460	456	455	440	446	454	478	439
r3-T25_NZ_CP019144.1_pmZS_A_lwoffii	525	515	505	556	229	501	514	24	531	512	511	512	533	497	443	533	457	113	511	508	548	520	552	552	534	498	503	532	523	530	497	500	555	517	522	326	328	495	523	326	513	490	518	528	533	500	506	534	472
r3-T143_NZ_JABAGU010000005.1_pAJ1_3_A_johnsonii	464	427	424	508	523	403	398	505	490	410	401	405	462	433	398	418	380	499	402	435	478	429	509	507	463	391	415	473	460	481	431	421	509	465	413	508	509	417	486	506	419	386	414	415	458	422	407	399	426
r3-T120_NZ_AP019741.1_pARA1_rep1_A_radioresistens	524	498	465	528	550	487	479	545	516	492	489	499	500	488	458	526	414	543	485	498	529	469	531	531	499	478	500	506	519	510	492	481	532	514	527	539	541	484	501	540	482	473	508	515	487	455	503	517	455
r3-T13_NZ_CP027662.1_pApW20-4_A_pittii	423	371	348	497	520	311	372	512	499	339	338	374	429	357	366	470	320	499	336	10	496	342	500	500	420	369	381	402	417	394	355	319	498	228	471	520	518	362	407	518	354	369	450	451	380	331	358	404	461
r3-T80_NZ_CP096123.1_pJNE5-OXA-58_A_portensis	5	437	406	454	544	425	424	528	516	430	431	434	458	426	17	466	377	522	430	420	472	412	456	457	308	430	415	427	24	427	432	405	456	432	480	549	547	441	418	548	431	425	470	455	426	406	412	441	440
r3-T65_LR026973.1_pKCRI-43-1_c106	421	453	410	468	539	399	410	524	496	372	409	435	432	371	366	466	386	524	403	405	511	415	471	472	403	406	423	428	421	384	370	388	470	382	491	525	525	452	48	524	389	392	450	444	397	403	391	463	472
r3-T25_NZ_CP072551.1_pH7-108_A_lwoffii	523	515	503	554	228	500	515	23	534	515	512	510	537	501	441	532	459	116	512	511	549	521	550	550	536	502	504	535	521	532	499	498	553	519	522	329	331	498	526	329	518	492	519	529	535	502	505	536	475
r3-T80_NZ_CP072552.1_pH7-68_A_lwoffii	21	435	403	454	545	424	422	526	516	429	430	434	455	421	33	462	372	518	429	416	474	406	456	457	304	429	413	426	2	429	426	406	456	423	484	547	545	439	419	546	429	425	473	456	426	401	415	442	444
r3-T52_NZ_CP089054.1_pRIVM_C010559_3_A_ursingii	423	430	378	481	549	392	330	546	488	333	382	424	432	397	361	474	362	548	382	398	505	355	481	481	419	356	405	398	420	372	395	378	481	408	492	538	537	412	399	535	350	345	482	464	397	386	404	432	440
r3-T7_NZ_CP077233.1_FDAARGOS_1397_plasmid_unnamed1_A_pittii	544	527	513	555	355	521	517	327	546	519	518	522	530	509	474	535	451	333	516	513	567	515	555	553	534	498	511	539	543	531	511	495	557	519	536	11	7	509	522	9	500	502	534	526	517	498	500	538	467
r3-T85_NZ_CP032110.2_pALWEK1.8_A_lwoffii	432	369	357	461	518	329	237	496	472	318	343	372	415	320	376	468	333	505	337	366	455	368	461	461	431	5	388	389	429	370	325	328	461	404	484	502	503	374	405	500	317	105	478	457	375	349	308	362	444
r3-T7_NZ_CP079794.1_pAJ_082-3_A_johnsonii	545	524	512	557	352	515	519	333	543	515	521	521	535	508	479	538	448	342	519	509	562	516	556	555	526	497	514	540	542	532	510	499	558	519	533	36	32	507	523	34	503	499	538	530	516	497	500	534	469
r3-T138_NZ_CP084308.1_pXMC5X702-5.2k_A_pseudolwoffii	494	517	514	517	549	498	489	547	474	502	502	493	504	499	434	499	454	544	499	498	478	499	518	516	501	500	475	502	493	488	501	509	518	505	490	544	545	506	485	543	485	480	484	469	486	506	496	486	471
r3-T29_NZ_CP083661.1_FDAARGOS_1487_plasmid_unnamed3_A_variabilis	449	347	377	492	518	373	407	496	476	382	361	266	436	381	392	460	353	498	362	377	490	398	489	488	446	387	248	429	449	456	387	371	491	425	486	505	507	333	441	505	381	377	460	458	427	380	388	418	442
r3-T72_NZ_CP113444.1_pC9_2_A_baumannii	459	448	419	500	556	423	427	536	491	420	429	443	74	438	402	423	395	538	427	435	500	420	500	501	459	417	445	447	461	443	437	437	503	429	497	539	541	455	434	538	411	418	421	429	450	423	424	440	449
r3-T6_NZ_CP027248.1_p2_100004_rep1_A_pittii	449	460	445	497	534	437	466	528	474	449	430	459	413	450	384	170	382	521	426	460	480	442	498	498	476	448	451	468	451	471	453	442	498	438	384	526	525	473	467	523	457	442	180	127	465	436	433	451	452
r3-T25_NZ_CP053948.1_WY4_plasmid_unnamed1_Acinetobacter_sp	524	516	504	554	225	500	515	26	534	515	512	508	536	497	442	534	458	117	510	509	547	522	550	550	534	501	502	535	523	530	495	496	553	517	523	326	328	498	522	326	517	491	519	530	533	501	506	532	475
r3-T193_NZ_CP055289.1_pBspH7_Acinetobacter_sp	453	451	437	510	530	427	476	516	485	447	431	456	408	451	391	248	385	511	430	455	463	443	506	509	469	450	456	470	452	487	458	448	506	430	393	511	510	454	465	508	455	456	209	237	467	431	419	463	469
r3-T1_NC_009084.1_pAB2_c39	425	369	294	470	528	1	324	499	455	310	196	335	419	330	358	453	268	500	196	315	460	290	471	470	418	326	371	324	422	403	327	249	471	369	461	520	519	373	406	516	326	315	446	440	314	266	312	397	431
r3-T14_NZ_CP084304.1_pXMC5X702-12k_A_pseudolwoffii	418	382	296	481	514	254	324	496	483	321	264	358	422	333	356	460	277	492	259	337	471	289	479	478	410	325	375	328	415	391	334	215	480	384	474	510	510	383	390	508	339	317	442	441	326	281	320	389	433
r3-T87_NZ_CP029391.2_p3_010030_A_defluvii	421	369	331	453	522	312	221	497	460	310	321	383	408	325	369	468	313	506	322	376	453	351	450	449	409	187	380	378	418	369	329	323	454	411	472	506	506	372	413	503	308	167	464	454	367	330	285	347	432
r3-T172_NZ_CP033118.1_p10_010062_A_wuhouensis	434	394	356	470	535	336	209	525	468	295	347	377	441	340	369	478	332	511	345	384	476	355	471	471	430	281	397	394	425	363	337	330	470	429	490	517	518	380	401	516	314	267	481	467	387	343	313	387	424
r3-T129_NZ_CP041297.1_p80-1-2-tetX3_A_indicus	538	537	524	564	366	522	525	336	550	530	533	537	539	522	463	536	473	348	533	520	552	528	563	565	556	520	536	546	540	544	526	511	564	536	535	301	300	542	532	298	532	521	539	537	527	518	503	533	472
r3-T2_GQ904227.1_pMMCU3_c47	432	369	274	462	526	201	324	514	484	317	11	347	431	329	364	458	250	497	11	337	466	278	462	461	427	339	375	328	432	412	328	247	461	373	462	524	523	364	405	520	333	323	453	439	336	250	324	406	438
r3-T125_NZ_JADKPY010000001.1_pSK-43_Acinetobacter_sp	535	554	519	567	570	527	524	575	525	524	514	522	542	532	457	530	477	571	515	536	558	517	566	568	523	540	524	545	534	552	531	520	571	531	558	558	557	544	538	554	508	531	531	543	545	532	516	523	494
r3-T152_NZ_CP015148.1_pIEC338SC3_A_pittii	446	383	447	499	551	444	439	539	481	431	449	405	465	428	384	479	395	534	447	437	506	445	499	499	435	452	405	448	451	415	429	426	498	436	507	541	542	370	439	540	407	437	470	465	439	431	442	427	471
r3-T5_NZ_CP087342.1_p1DB008_A_baumannii	404	395	2	481	525	295	334	506	487	341	273	372	420	345	351	463	162	508	270	350	489	128	479	480	404	357	334	334	399	401	347	271	482	397	478	512	512	382	409	509	354	345	443	446	330	139	306	391	431
r3-T33_NZ_CP048676.1_pYH12138-6_Acinetobacter_sp	435	179	379	486	528	372	387	495	475	368	364	333	455	363	380	466	332	499	359	364	482	393	485	486	440	374	344	453	435	434	366	375	488	442	491	511	509	30	444	509	355	360	452	452	430	364	401	404	474
r3-T5_CP099970.1_pF-1629	403	391	20	481	524	276	332	499	487	339	268	375	419	337	350	458	164	503	264	344	488	132	479	480	399	350	337	335	399	395	339	263	482	395	483	508	508	378	412	505	351	336	440	447	340	147	310	395	432
r3-T27_NZ_LQXZ01000009.1_MEX11594_plasmid_unnamed_A_baumannii	448	464	404	500	539	423	391	537	525	391	422	461	434	397	374	475	397	537	423	424	523	400	500	500	427	376	439	435	446	380	394	407	501	403	489	527	525	462	363	524	405	394	455	462	426	415	411	463	450
r3-T13_NZ_AP021938.1_pWP2-W18-ESBL-11_2_A_pittii	424	371	349	499	521	313	373	513	501	339	339	375	431	358	367	471	322	500	338	10	497	344	502	502	421	371	382	403	418	395	356	321	500	228	469	521	519	362	408	519	356	371	451	451	381	333	358	404	463
r3-T24_NZ_CP032281.1_p2_010055_Acinetobacter_sp	424	375	347	456	514	329	312	502	481	317	326	372	432	25	377	464	307	491	324	353	471	351	457	456	417	318	401	398	417	396	20	323	457	399	477	516	515	360	375	513	323	327	439	438	387	323	343	408	442
r3-T82_NZ_CP068188.1_FDAARGOS_1094_plasmid_unnamed3_A_johnsonii	504	517	511	564	563	491	509	533	518	505	522	513	547	519	426	531	479	535	524	521	576	516	565	566	494	526	513	528	499	522	522	502	564	529	532	532	533	524	523	533	495	510	515	516	528	516	535	518	502
r3-T12_NZ_CP031710.1_p2_010060_A_wuhouensis_rep1	428	361	266	458	515	175	320	495	481	310	64	338	426	319	359	460	246	483	68	323	460	277	458	457	425	328	364	323	429	403	317	236	459	366	461	504	503	361	401	500	330	315	450	438	320	241	310	396	435
r3-T130_NZ_CP079749.1_pMRA_A_johnsonii	543	549	519	556	343	512	526	334	521	517	515	527	541	508	468	534	468	333	516	529	548	527	555	554	553	526	526	538	538	541	510	499	557	530	540	255	253	534	519	251	517	517	525	528	522	513	499	544	473
r3_T30_CP094287.1_pNY5301-4	425	413	374	454	535	368	238	509	490	319	369	417	422	350	365	465	357	506	367	378	466	381	453	454	408	286	410	391	423	345	354	356	453	395	483	517	516	417	390	513	329	286	476	457	384	383	342	398	422
r3-T93_NZ_CP094543.1_pYH16040-2_Acinetobacter_sp	422	372	342	451	526	317	276	506	490	144	315	375	418	309	361	459	315	501	311	341	487	358	448	449	418	308	379	397	417	374	311	341	450	400	490	501	501	361	393	499	212	297	469	459	383	332	361	393	440
r3-T45_NZ_CP048655.1_pC15-1_A_indicus	527	518	507	559	230	505	512	9	535	513	514	515	538	496	445	531	458	115	514	512	549	524	555	555	536	500	505	537	526	531	498	500	558	520	523	324	326	503	526	324	513	490	519	524	538	502	508	533	475
r3-T113_NZ_CP044448.1_pCMG3-2-3_A_indicus	433	327	372	483	522	337	381	518	469	356	348	4	433	373	375	454	329	514	347	372	463	378	483	482	446	369	143	424	433	441	368	344	482	429	486	523	522	329	436	520	381	369	462	454	397	353	385	415	466
r3-T122_NZ_CP048660.1_pYH12207-1_A_piscicola_rep1	492	476	448	569	562	442	436	568	505	437	443	454	475	460	414	472	402	568	442	480	518	446	567	569	477	450	446	477	488	485	461	431	570	464	520	568	567	472	456	565	454	433	477	474	471	439	441	458	477
r3-T5_GU978997.1_p203_c89	404	396	2	481	526	296	333	506	487	342	274	373	420	344	351	463	162	508	271	350	488	128	479	480	403	355	334	334	401	401	346	270	482	398	479	513	513	383	409	510	354	344	443	446	332	138	304	391	431
r3-T200_NZ_CP087315.1_p3OC059_A_baumannii	421	455	414	482	545	397	408	526	490	389	411	445	436	376	361	481	386	535	407	410	518	408	484	484	394	397	432	418	419	389	374	381	485	384	491	529	529	435	150	528	399	391	467	457	395	401	397	458	468
r3-T21_CP038501.1_p3CIAT758_c10	523	512	510	549	238	501	510	116	534	505	500	512	534	491	445	528	455	11	497	499	556	518	547	546	534	510	504	529	521	542	494	499	549	506	535	336	336	505	520	334	513	499	513	522	523	501	504	541	474
r3-T31_NZ_CP044480.1_pHZE33-1-6_A_schindleri	406	392	272	467	512	251	324	502	483	326	248	346	425	322	347	456	277	498	246	323	473	291	467	467	411	324	355	339	406	395	323	5	469	374	466	495	494	376	381	494	351	320	451	451	332	278	299	395	433
r3-T26*_NZ_AYFZ01000080.1_pABUH2a-5.6_c33	516	491	487	520	554	453	471	534	1	492	486	472	501	483	453	488	433	535	484	503	375	491	517	518	508	470	474	466	515	502	479	483	520	504	515	546	546	476	495	544	478	478	475	486	501	479	464	510	454
r3-T16_CM016516.1_pTG31307_c20	474	477	487	506	557	477	468	560	520	483	493	471	512	478	409	479	450	552	489	484	530	497	511	510	463	472	467	480	470	506	475	481	510	487	525	560	558	482	492	557	493	477	486	485	469	498	494	494	485
r3-T4_CP090183.1_pAB1343	428	363	341	499	510	311	362	509	480	342	324	337	409	347	372	460	322	495	325	147	473	357	497	496	431	358	377	405	424	399	347	306	497	230	472	517	515	361	409	514	352	360	445	446	378	335	350	401	446
r3-T11_NZ_CP044461.1_pB18-6_A_indicus	413	385	298	478	510	259	328	498	482	326	261	349	419	329	346	453	282	492	259	348	477	286	475	474	413	330	373	338	409	388	333	202	479	371	483	497	497	372	389	496	344	318	449	445	328	284	327	390	433
r3-T169_NZ_CP010357.1_pXBB1-6_A_johnsonii	420	338	357	480	513	323	361	495	474	349	332	357	421	325	362	461	318	487	336	229	473	360	479	480	405	356	382	397	415	408	332	320	480	294	482	516	514	348	421	513	355	349	457	448	388	339	361	407	462
r3-T199_NZ_AP019743.1_pARA3_A_radioresistens	421	450	405	463	534	403	406	529	498	382	409	437	435	366	360	478	382	537	406	409	505	415	466	466	408	404	415	418	421	380	365	391	465	397	482	533	533	453	100	532	391	385	455	458	396	395	394	463	470
r3-T63_CP012956.1_pD36-4_c104	417	448	410	473	541	394	403	526	494	377	409	446	439	371	358	465	375	537	404	415	507	406	476	477	398	393	436	421	414	394	371	374	477	395	485	532	532	444	119	531	407	382	452	450	400	393	395	454	471
r3-T5_NZ_CP027248.1_p2_100004_rep2__A_pittii	404	397	1	480	526	296	335	507	487	343	276	375	421	347	351	463	164	509	273	351	487	129	478	479	402	357	335	332	401	400	349	271	481	396	480	514	514	385	411	511	356	345	445	448	333	140	307	392	430
r3-T177_NZ_CP104654.1_2021CK-01005_plasmid_unnamed3_A_variabilis	426	384	355	456	505	320	229	506	471	313	345	391	424	336	367	475	319	504	343	378	463	356	457	456	428	206	389	386	422	375	335	343	457	424	466	506	506	390	406	503	337	181	481	457	370	336	298	368	432
r3-T80_NZ_AP019742.1_pARA2_A_radioresistens	3	438	405	452	544	425	424	527	516	430	430	434	458	427	15	467	376	521	429	420	471	412	454	455	309	430	415	427	22	427	432	405	454	433	480	549	547	441	417	548	431	425	470	456	426	405	412	441	440
r3-T10_CM003742.1_p1MEX11594_c114	454	447	448	495	528	439	459	522	484	447	439	452	425	431	391	160	393	518	435	449	479	441	496	496	465	455	449	481	455	471	440	449	493	425	377	526	525	454	445	525	459	449	165	3	471	442	428	464	446
r3-T5_CP038260.1_pEH_gr3_c91	405	397	1	482	526	296	335	507	486	343	276	375	421	347	351	463	164	509	273	351	488	129	480	481	404	357	333	333	402	401	349	271	483	396	479	513	513	385	409	510	354	345	445	446	332	140	307	392	430
r3-T28_NZ_MT771291.1_pFA319_A_seifertii	311	435	401	472	550	416	410	532	506	418	422	442	465	411	269	462	370	530	420	419	504	414	474	475	5	430	428	437	306	429	417	408	474	415	489	533	533	439	401	531	406	408	470	462	422	402	423	450	457
r3-T34_NZ_CP031974.1_pAhaemAN59b_A_haemolyticus	457	447	416	500	541	425	428	538	503	422	434	441	33	431	400	414	390	536	435	431	488	410	499	500	467	416	441	448	453	431	433	430	500	428	503	534	536	453	430	533	418	420	415	420	449	415	416	428	446
r3-T23_AP025533.1_pOCUAc19-2_A_baumannii	455	444	433	509	506	436	459	507	486	448	445	450	413	457	393	265	388	504	442	452	468	424	508	510	446	454	452	472	452	466	456	447	509	437	376	508	509	448	449	507	440	436	249	246	466	427	423	449	452
r3-T109_NZ_CP045106.1_pAJ4133_A_johnsonii	418	341	363	471	518	325	362	502	483	348	330	365	423	331	358	466	321	498	336	220	475	370	472	473	404	365	384	404	414	412	337	327	473	295	488	525	523	322	421	522	361	352	470	462	394	341	358	404	464
r3-T13_CP010400.1_p6200.2_c77	421	367	349	497	516	313	377	509	503	335	339	373	433	357	368	470	321	497	338	1	493	343	500	500	421	367	381	402	415	393	355	319	498	228	471	516	514	361	409	514	356	369	449	450	380	331	355	403	461
r3-T52_NZ_CP059688.1_FDAARGOS_731_plasmid_unnamed3_A_radioresistens	421	437	379	470	549	390	341	542	491	328	382	425	435	393	360	483	376	545	381	401	504	360	470	470	417	358	409	399	418	373	391	384	470	408	484	539	538	413	402	536	341	348	482	462	399	399	410	433	437
r3-T15_CP084299.1_LHC22-2	410	390	308	472	517	313	297	504	463	359	329	388	418	344	358	443	304	503	328	358	446	320	471	470	425	297	379	385	410	377	345	297	470	413	472	501	502	399	393	500	360	283	445	427	366	304	19	338	438
r3-T117_NZ_CP055283.1_pBspH1_Acinetobacter_sp	499	487	474	518	542	455	458	533	247	474	460	470	487	470	438	477	407	517	460	489	393	470	520	521	490	475	486	448	494	493	472	452	520	489	507	543	543	476	485	542	469	473	472	479	484	458	469	504	449
r3-T147_NZ_CP039148.1_p10FS3-1-5_Acinetobacter_sp	446	375	281	473	527	132	326	510	461	303	184	355	422	338	378	448	271	495	182	327	466	286	472	471	426	328	376	341	444	408	338	260	472	379	468	524	525	365	402	524	325	320	438	437	330	269	309	398	435
r3-T60_CM009647.1_p2ZQ2_c86	406	371	137	491	519	265	327	502	477	331	249	355	409	330	344	455	43	499	245	332	472	141	491	492	403	347	360	338	401	400	332	273	492	394	467	498	498	363	403	495	341	335	428	443	324	2	303	398	430
r3-T80_NZ_KT965092.1_pNDM-GJ01_A_towneri	28	437	412	455	539	420	422	526	518	430	426	439	462	427	40	463	375	520	425	418	476	408	458	459	306	427	421	425	32	428	431	407	458	426	475	550	548	439	425	549	434	426	467	457	428	409	415	438	443
r3-T139_NZ_CP032269.1_p11_010034_Acinetobacter_sp	517	493	484	538	559	474	490	556	524	487	489	475	489	495	447	527	439	550	489	490	516	482	540	537	512	509	474	507	514	515	491	480	538	514	455	558	558	479	506	556	488	498	519	519	459	479	501	514	472
r3-T97_NZ_CP031993.1_pAhaem2126che_A_haemolyticus_rep1	413	429	345	484	538	353	375	530	489	377	360	417	443	381	360	466	342	530	360	390	497	348	487	487	415	398	402	378	407	395	385	333	487	387	483	528	529	424	386	527	390	387	455	445	378	343	384	459	431
r3-T80_NZ_CP046043.1_p19110F47-1_A_towneri	28	433	402	452	547	424	422	527	517	432	433	435	453	423	37	459	374	522	432	416	476	408	455	456	301	427	414	426	9	427	428	408	454	423	487	549	547	439	418	548	431	423	474	455	425	403	418	442	443
r3-T96_NZ_CP080643.1_pALWEK1.16_A_lwoffii	426	424	329	485	538	313	372	537	501	397	331	395	446	386	361	485	332	524	328	379	485	333	486	485	422	371	411	232	426	423	388	332	486	396	414	515	515	424	395	515	383	365	467	469	6	322	359	433	433
r3-T57_CP023023.1_pAba10324a_c69	416	391	331	449	523	307	177	496	473	278	324	384	424	323	360	474	311	492	325	357	447	354	447	447	416	235	393	380	414	328	326	311	449	405	474	498	497	381	397	494	294	213	470	452	376	335	289	353	428
r3-T80_NZ_CP032284.1_pNDM1_010055_Acinetobacter_sp	1	439	404	453	545	426	425	527	516	430	430	435	458	428	17	466	376	521	429	421	471	411	455	456	308	431	415	425	20	428	433	406	455	432	480	548	546	440	418	547	430	426	470	456	426	405	413	442	440
r3-T44_NZ_CP045124.1_pXG-160kb_A_indicus	533	516	512	555	213	527	517	223	556	513	525	528	545	492	451	541	464	222	522	504	556	514	554	554	534	521	520	558	534	533	494	502	554	519	528	344	344	524	534	346	519	516	534	513	537	510	514	529	482
r3-T33_NZ_CP032122.2_pALWED2.7_A_lwoffii	439	172	386	483	526	372	391	498	477	369	365	334	457	359	382	463	334	501	360	364	482	400	483	484	445	369	350	448	438	438	365	373	485	440	498	513	511	11	453	511	356	361	452	454	426	366	401	402	470
r3-T84_NC_025120.1_pM131-6_Acinetobacter_sp	425	371	345	443	514	317	224	490	479	305	323	370	416	319	369	466	315	496	320	367	460	356	441	441	406	101	380	394	423	364	323	318	443	408	477	502	503	359	397	500	309	2	460	449	369	337	291	347	438
r3-T29_NC_025137.1_pMS32-3_A_pittii	450	347	376	493	519	372	408	495	475	381	360	267	436	382	393	460	354	497	361	378	491	399	490	489	445	386	249	430	450	455	388	370	492	426	485	504	506	332	442	504	380	376	460	458	428	381	389	419	441
r3-T5_CP021348.1_pB8300_c90	403	396	1	481	525	296	334	506	487	341	274	373	419	345	350	463	162	508	271	350	488	127	479	480	403	356	333	333	400	400	347	270	482	397	478	513	513	383	409	510	354	344	443	446	331	138	305	390	431
r3-T189_NZ_CP027661.1_pApW20-3_A_pittii	424	429	354	476	542	369	400	528	497	383	376	418	466	386	366	481	367	520	372	413	500	353	478	478	429	411	408	390	426	415	388	352	477	407	501	533	532	430	400	531	392	402	458	461	381	363	391	450	445
r3-T26_CP061711.1_E_072658	516	491	487	520	554	453	471	534	2	492	486	472	501	483	453	488	433	535	484	503	375	491	517	518	508	470	474	466	515	502	479	483	520	504	515	546	546	476	495	544	478	478	475	486	501	479	464	510	454
r3-T93_NZ_CP022301.1_pIC001C_A_johnsonii	433	370	343	451	532	310	276	507	487	141	305	375	413	314	366	460	316	493	302	339	487	356	448	449	424	314	383	395	431	377	318	341	449	397	488	504	504	361	396	502	210	306	462	449	382	334	369	395	443
r3-T114_NZ_JABAGU010000006.1_pAJ1_4_A_johnsonii	467	447	455	513	525	420	471	521	498	451	439	454	431	436	401	304	391	512	437	443	472	447	513	512	477	453	457	487	467	479	442	447	511	449	427	519	518	440	460	516	442	449	282	303	469	436	452	448	446
r3-T24_NC_010309.1_pAV1_A_venetianus	428	375	346	456	520	332	306	500	483	314	333	375	432	4	381	463	312	490	331	358	469	359	457	456	411	319	400	405	421	397	23	321	457	397	477	511	510	360	374	508	316	321	440	435	388	331	344	403	443
r3-T10_NC_010396.1_p2ABSDF_c113	457	449	447	495	529	441	461	523	486	449	440	454	424	433	394	158	393	521	436	451	479	442	496	496	465	456	451	483	458	471	443	451	493	427	378	526	525	455	447	525	461	450	165	2	471	443	431	462	447
r3-T3_CP072527.1_pDETAB4_c32	455	498	483	12	566	473	443	559	515	449	459	484	496	453	386	502	449	547	455	500	527	501	15	10	478	457	493	495	458	484	457	468	13	487	521	553	552	483	470	550	474	441	508	495	486	493	469	489	488
r3-T35_NZ_CP044471.1_pHZE23-1-8_A_schindleri_rep1	431	446	426	492	541	411	423	539	502	416	409	438	215	427	377	435	403	536	408	423	490	413	492	492	445	415	437	451	429	425	427	416	491	407	502	539	539	457	434	537	416	404	425	409	449	430	419	438	442
r3-T13_NZ_JAPHLB020000018.1_pT190_4_A_baumannii	424	370	348	498	520	312	372	512	500	338	338	374	430	357	367	471	321	499	337	9	496	343	501	501	420	370	381	402	418	394	355	320	499	227	470	520	518	361	407	518	355	370	451	452	380	332	357	403	462
r3-T93_NZ_CP102100.1_p214-1_A_colistiniresistens	433	369	344	450	533	311	276	508	487	142	306	376	413	314	366	459	317	494	303	338	487	357	447	448	423	314	384	394	431	377	318	342	448	396	488	503	503	360	396	501	209	306	461	448	381	335	369	394	443
r3-T66_CP042559.1_pE47_003_c107	429	430	397	494	546	413	429	558	488	413	419	427	444	417	372	467	371	541	417	420	497	398	494	496	423	437	420	440	423	449	423	404	496	427	498	548	548	431	437	548	414	448	468	461	439	397	428	439	470
r3-T7_CP044357.1_pCAM180A_c7	548	526	514	556	350	521	519	324	545	519	520	523	530	512	478	535	451	337	518	515	569	516	556	554	535	499	512	539	547	532	514	496	558	520	535	1	5	510	523	5	504	502	536	526	515	499	502	538	467
r3-T168_NZ_CM012186.1_pAbe229-9_A_bereziniae	435	396	349	478	511	342	328	497	490	319	342	396	434	216	382	467	321	492	339	362	492	357	476	475	404	340	389	407	429	388	220	321	478	410	480	502	503	386	376	502	335	329	459	449	398	337	362	407	460
r3-T35_NZ_ALII01000019.1_pIS123-18_c101	430	443	430	492	540	415	421	541	505	412	412	439	215	421	376	437	396	539	411	417	487	415	492	492	445	414	433	452	429	421	423	418	491	404	502	539	539	455	429	537	416	407	428	410	453	425	419	437	445
r3-T174_NZ_JAPHLB020000022.1_pT190_8_A_baumannii	519	472	492	528	554	471	487	543	255	496	494	487	494	493	448	494	439	535	490	495	402	491	526	526	500	478	493	481	518	500	493	475	529	486	532	539	539	490	490	537	490	476	501	496	500	482	468	500	463
r3-T59_NZ_CP031711.1_p3_010060_A_wuhouensis	402	370	291	473	515	228	320	505	485	327	248	353	425	329	333	458	279	499	248	328	472	289	474	473	412	330	365	326	398	398	332	203	472	372	479	511	511	367	390	510	349	320	446	447	320	281	324	399	442
r3-T14_CP098793.1_p2VB280820	417	382	296	482	513	252	324	495	483	322	265	358	423	334	355	460	276	492	260	337	471	289	480	479	411	324	375	327	414	392	335	215	481	385	474	511	511	384	390	509	338	316	442	441	325	281	320	389	433
r3-T159_NZ_CP054806.1_FDAARGOS_557_plasmid_unnamed1_A_lwoffii	513	491	482	527	563	479	472	544	205	486	475	488	481	482	451	489	428	539	477	509	382	470	524	525	508	479	483	475	508	505	480	475	526	497	533	540	540	495	493	538	482	475	484	483	505	474	470	505	459
r3-T162_NZ_JABAGU010000010.1_pAJ1_7_A_johnsonii	433	434	316	470	530	343	392	539	492	368	327	428	437	378	367	467	306	527	325	382	482	306	469	470	416	381	429	358	432	393	375	326	469	398	466	527	529	429	411	529	401	377	461	459	348	302	383	462	427
r3-T190_NZ_CP032283.1_p4_010055_Acinetobacter_sp	419	389	336	443	520	325	63	511	475	280	332	384	416	314	361	487	304	507	333	371	459	343	443	442	410	232	382	380	415	367	321	325	445	410	475	518	518	387	403	515	292	227	481	470	366	320	297	366	435
r3-T29_NZ_MK978161.1_pAVAci116_A_lwoffii	451	346	377	496	520	372	409	495	474	382	362	264	435	385	394	461	355	497	363	376	489	402	493	492	447	387	250	431	450	457	390	368	495	427	487	508	510	333	442	508	380	378	461	461	431	383	392	419	445
r3-T73_CP061706.1_p8E072658_H2787_17600	541	528	512	563	202	520	525	207	549	523	524	524	538	502	462	536	475	224	523	505	559	521	562	562	553	521	518	544	540	539	509	497	563	515	537	353	355	528	533	355	533	518	533	521	531	518	511	528	482
r3-T48_CP062923.1_p1Res13-Abat_c19	433	414	329	482	551	309	344	538	482	401	349	399	446	363	360	472	324	539	347	395	477	334	484	483	417	352	410	343	428	424	364	308	484	408	475	543	542	418	407	539	410	335	459	456	327	326	335	419	443
r3-T97_NZ_AP019748.1_pARA8_A_radioresistens	417	422	345	491	530	355	376	528	488	382	351	410	444	377	364	474	343	524	350	386	493	343	494	494	421	400	395	378	417	406	380	324	494	399	487	524	523	416	395	522	382	391	462	450	376	340	379	453	433
r3-T42_NC_010398.1_p3ABSDF_c111	458	441	432	507	503	434	453	501	481	439	440	441	404	458	393	264	385	493	437	447	468	425	506	508	444	449	442	468	459	464	457	438	507	435	385	514	513	448	454	511	435	435	246	258	457	424	416	448	454
r3-T185_NZ_CP055291.1_pBspH9_Acinetobacter_sp	439	385	338	480	526	332	348	507	493	347	350	387	405	334	377	445	319	502	347	204	483	344	480	480	412	349	391	410	434	401	335	316	480	275	472	507	505	362	405	504	354	342	444	455	385	336	356	401	460
r3-T93_NZ_CP031975.1_pAhaemAN59a_A_haemolyticus	429	370	340	455	532	321	280	512	489	135	309	373	419	310	367	469	320	501	306	339	492	356	452	453	426	319	384	403	426	381	314	347	452	395	496	515	515	373	398	513	209	313	469	460	388	337	367	397	443
r3-T17_NZ_CP044447.1_pCMG3-2-2_A_indicus	437	182	391	477	520	324	375	505	461	343	351	324	433	360	373	466	327	504	349	374	464	393	477	476	429	355	364	444	437	436	357	365	478	422	488	502	502	176	455	501	329	344	456	460	419	364	386	377	465
r3-T112_NZ_CP048675.1_pYH12138-5_Acinetobacter_sp	507	487	488	523	568	460	484	549	269	494	475	479	482	491	439	491	432	541	475	494	401	477	520	521	503	488	485	459	502	498	492	484	524	474	512	543	543	497	501	541	484	478	495	483	496	474	469	492	461
r3-T7_CP027245.2_pOXA58_005078_c3	549	521	513	558	357	519	516	331	545	517	518	518	531	510	481	536	448	338	516	512	567	512	558	556	530	499	507	537	548	532	512	494	560	517	535	19	15	507	520	17	498	501	535	525	512	497	501	534	470
r3-T23_NZ_MDIM02000005.1_p5_UKK-0548_A_pittii	457	441	428	510	505	435	455	502	485	441	443	438	405	454	393	263	384	499	440	451	463	427	509	511	443	449	442	470	454	466	454	440	510	441	384	514	513	450	451	511	436	436	245	254	460	424	422	447	455
r3-T2_AP022240.1_pWP8-W18-ESBL-11_2_c44	435	362	268	458	523	187	322	504	484	317	39	343	428	329	364	455	245	491	41	332	457	278	458	457	425	334	368	324	435	400	329	236	459	373	462	511	510	358	402	507	330	315	452	437	322	244	316	402	434
r3-T40_NZ_CP092457.1_AHP123_plasmid_unnamed3_Acinetobacter_sp	421	374	359	457	516	326	217	511	453	314	337	383	428	318	364	467	325	503	332	369	469	362	458	457	413	197	387	391	416	378	320	338	458	417	476	516	516	380	403	514	325	190	473	450	385	344	301	372	431
r3-T127_NZ_CP015111.1_TGL-Y2_plasmid_unnamed1_rep1_Acinetobacter_sp	531	536	505	561	549	503	527	547	520	515	517	537	536	530	456	511	462	540	516	534	549	516	561	562	530	526	528	538	531	536	538	513	562	530	542	547	546	521	528	543	521	518	498	498	531	517	509	539	494
r3-T24_NZ_CP028557.1_p2_010045_Acinetobacter_sp	428	374	347	454	518	332	305	500	482	316	333	374	431	3	381	462	310	490	331	357	467	356	455	454	412	318	398	403	421	398	22	322	455	396	478	511	510	360	371	508	318	320	439	434	385	328	342	401	444
r3-T82_NZ_CP068177.1_FDAARGOS_1096_plasmid_unnamed2_A_ursingii	503	516	511	565	562	490	508	532	518	504	521	512	547	518	426	531	478	534	523	520	576	516	566	567	494	525	512	528	498	521	521	501	565	529	532	531	532	523	522	532	494	509	515	516	528	515	534	517	502
r3-T56_CP050408.1_pVB2486_5_c65	447	454	376	491	542	357	385	536	432	423	371	455	461	405	379	485	370	538	371	430	493	386	491	489	463	394	442	382	446	420	408	373	493	441	500	537	538	459	412	535	426	397	476	454	394	376	303	447	462
r3-T92_NZ_CP044465.1_pHZE23-1-2_A_schindleri	489	500	487	544	551	481	494	534	493	494	504	515	518	510	423	493	447	526	504	507	532	490	547	548	472	510	495	509	489	517	512	485	548	504	533	535	536	497	504	533	499	497	493	485	509	496	503	503	483
r3-T132_NZ_CP015111.1_TGL-Y2_plasmid_unnamed1_rep2_Acinetobacter_sp	522	517	488	570	549	490	501	539	538	497	492	524	510	509	452	517	449	541	489	508	582	478	570	568	508	507	503	511	520	516	509	488	571	506	536	555	556	510	514	557	479	493	509	518	512	481	505	524	470
r3-T89_NZ_CP083948.1_CSUSB1_plasmid_unnamed1_A_johnsonii	538	533	507	546	314	512	516	298	555	520	516	517	541	505	459	534	473	289	517	511	563	505	542	541	529	522	512	540	540	557	503	491	545	522	525	353	353	528	542	351	520	502	534	524	512	511	513	524	486
r3-T12_CP045108.1_p1ATCC19606_c49	430	374	260	458	514	180	320	499	481	315	71	342	428	324	362	455	248	486	71	329	463	271	458	457	425	342	360	326	428	399	325	243	459	369	457	510	509	363	404	506	331	325	450	438	328	241	314	400	441
r3-T99_NZ_CP032287.2_pALWED3.2_A_lwoffii	411	374	293	449	501	255	323	499	485	327	254	348	430	334	347	470	268	492	249	337	465	287	448	447	410	330	370	324	409	392	332	217	448	392	475	518	520	366	387	519	343	316	454	446	317	276	318	387	448
r3-T7_NZ_CP022299.1_pIC001A_A_johnsonii	544	522	512	557	357	518	516	334	541	515	519	517	531	506	475	536	448	343	517	511	564	512	557	555	532	497	508	535	543	530	508	495	559	514	533	18	14	505	521	16	497	502	534	525	511	496	503	534	468
r3-T14_NZ_CP030756.1_H3_plasmid_unnamed2_A_schindleri_rep1	414	383	299	476	511	257	329	499	480	324	268	352	419	335	351	457	283	497	263	334	471	298	474	473	409	328	375	332	409	391	336	219	477	382	477	510	510	377	391	509	348	321	444	439	338	290	324	391	433
r3-T126_NZ_AP019741.1_pARA1_rep2_A_radioresistens	533	535	532	583	575	526	530	567	525	532	536	530	543	542	456	520	472	565	535	540	576	529	584	582	513	531	519	532	533	548	542	531	585	534	535	558	558	546	546	556	516	534	510	521	529	536	540	530	518
r3-T165_NZ_CP016903.1_pGFJ7_A_soli	411	409	301	474	543	304	320	538	502	379	313	404	458	354	358	477	308	530	313	375	481	318	473	472	411	344	416	320	406	412	353	320	475	407	487	542	543	400	407	540	387	335	472	466	313	307	306	416	460
r3-T62_KY617771.1_pS30-1_c97	410	396	126	500	526	290	340	521	491	353	281	380	406	357	356	454	166	516	276	347	485	5	497	499	415	364	345	334	406	397	352	288	500	386	482	513	513	395	417	512	359	355	445	444	333	142	317	396	425
r3-T24_NZ_CP055279.1_pBspH11_Acinetobacter_sp	429	376	346	453	517	331	307	499	483	316	333	374	432	2	382	462	310	489	331	355	468	357	454	453	413	320	400	402	422	398	21	323	454	394	479	513	512	362	373	510	318	320	439	434	386	328	343	401	444
r3-T20_NZ_CP077371.1_FDAARGOS_1394_plasmid_unnamed2_A_lwoffii	499	500	502	551	550	493	503	530	496	506	508	522	527	521	425	495	455	528	508	519	537	502	554	555	489	512	508	526	498	525	521	498	553	509	529	535	536	502	508	533	506	500	498	487	515	507	519	512	487
r3-T25_NZ_CP030755.1_H3_plasmid_unnamed1_A_schindleri	528	521	503	555	233	502	517	38	542	512	511	511	540	499	446	530	458	99	511	511	552	526	551	551	543	505	507	537	527	533	499	497	554	519	524	332	334	507	527	332	517	495	516	527	536	505	509	536	474
r3-T39_NZ_CP084306.1_pXMC5X702-6.3k_A_pseudolwoffii	463	473	458	532	548	462	469	534	442	468	457	467	481	465	404	422	413	523	456	483	496	463	534	532	472	466	472	459	464	497	465	455	534	479	458	532	533	462	476	531	476	453	418	419	477	461	465	473	454
r3-T21_CP060995.1_pCAb-65-2	483	475	477	519	230	464	474	126	489	467	463	476	502	464	436	483	423	39	459	468	511	484	517	516	490	470	469	487	482	505	467	465	519	469	488	318	318	478	491	316	471	462	471	474	484	468	467	504	442
r3-T18_NZ_CP095410.1_pTCM-3_A_pittii	504	492	480	534	541	475	486	533	325	487	476	473	483	481	434	489	436	534	475	498	412	472	530	531	504	486	468	482	502	501	480	467	533	480	523	525	524	496	487	523	491	480	492	481	514	476	464	505	458
r3-T4_CM009653.1_p5ZQ6_c67	424	359	345	504	511	311	362	510	479	341	325	332	406	352	369	464	326	497	327	142	478	355	502	501	433	358	370	408	422	399	352	307	502	230	471	521	519	361	416	518	355	358	452	448	383	339	347	396	451
r3-T11_NZ_CP090071.1_pYUSHP14-4_Acinetobacter_sp	414	386	301	479	512	259	332	498	483	329	267	353	421	331	348	451	285	497	265	350	477	293	476	475	412	330	379	340	410	387	335	204	480	374	484	500	500	372	389	499	346	315	447	446	329	287	328	389	435
r3-T34_NZ_CP016900.1_pGFJ4_A_soli	459	450	419	496	548	419	427	537	498	413	429	433	4	432	403	413	383	534	431	430	486	406	495	496	466	412	441	444	456	438	433	424	496	423	502	530	532	451	427	529	411	416	422	425	447	410	420	430	446
r3-T192_NZ_MK323041.1_pAs1069_b_A_seifertii	457	447	413	499	550	418	419	539	496	419	433	442	75	430	402	419	392	540	432	433	483	414	498	499	463	413	452	444	454	444	432	429	499	423	493	531	533	449	433	530	414	414	424	426	438	412	419	437	445
r3-T77_CP061708.1_p6E072658_H2787_18280	522	510	513	540	553	526	513	553	503	523	527	519	528	538	459	525	468	543	526	529	519	521	542	540	493	519	486	532	526	513	535	526	541	523	534	533	533	509	510	532	520	519	509	520	507	523	527	527	472
r3-T29_CP062922.1_p2Res13-Abat_c81	452	347	376	495	519	374	409	496	475	383	362	267	435	385	395	461	355	496	363	377	490	400	492	491	447	388	251	432	452	458	391	370	494	426	487	506	508	332	443	506	381	380	461	459	430	381	392	419	444
r3-T86_NZ_CP026418.1_pKPC-8dee_Acinetobacter_sp	435	35	396	494	514	375	387	507	484	370	372	320	450	353	378	460	336	499	367	368	475	398	493	494	434	363	344	450	433	435	363	372	493	423	490	515	515	169	453	514	355	370	448	443	425	374	399	403	456
r3-T52_NZ_CP072553.1_pH7-48_A_lwoffii	423	430	378	481	549	392	330	546	489	333	382	424	433	397	361	475	362	548	382	398	505	355	481	481	419	356	405	399	420	372	395	378	481	408	493	538	537	412	400	535	350	345	483	465	397	386	404	432	440
r3-T90_NZ_CP015616.1_p1AsACE_A_schindleri	525	514	502	549	226	494	505	79	536	505	506	508	523	494	442	523	458	124	504	505	547	519	545	545	536	499	508	532	525	527	495	492	548	511	521	322	324	506	525	322	510	488	517	518	530	504	500	522	473
r3-T75_CP061707_p7E072658_H2787_18135	454	212	399	493	521	346	383	502	480	344	325	332	451	377	389	451	334	503	322	374	479	404	494	494	444	368	359	440	453	465	379	363	492	415	489	516	514	193	432	512	337	368	443	447	425	372	393	406	458
r3-T40_NZ_CP055278.1_pBspH10_Acinetobacter_sp	419	377	355	469	513	330	224	508	463	318	341	385	431	324	362	467	326	505	337	377	465	356	472	470	415	197	386	387	414	373	324	342	471	417	470	506	506	384	408	504	330	186	475	452	384	344	296	356	433
r3-T151_NZ_CP068189.1_FDAARGOS_1094_plasmid_unnamed4_A_johnsonii	502	487	507	554	556	481	480	556	326	501	489	486	506	470	440	496	432	559	490	521	286	505	557	557	504	478	491	484	504	505	476	489	558	513	526	555	555	496	509	554	490	482	487	496	499	485	500	501	458
r3-T77_NZ_CP060815.1_pXM9F202-2-13k_A_variabilis	520	509	510	542	553	524	516	547	504	522	525	513	530	538	456	527	462	535	522	530	520	516	542	542	495	518	483	529	524	514	535	527	541	523	532	531	531	507	510	530	518	517	508	524	504	516	521	529	471
r3-T119_NZ_CP055286.1_pBspH4_Acinetobacter_sp	414	312	422	492	542	422	420	509	487	412	426	385	456	417	366	480	391	507	423	421	496	418	493	492	406	410	368	455	413	432	415	408	494	419	502	511	509	313	425	508	399	408	470	456	439	416	406	429	458
r3-T141_NZ_CP089057.1_pRIVM_C010559_6_A_ursingii	439	453	350	515	539	348	395	530	476	407	367	432	477	411	365	493	338	530	364	421	491	365	516	516	449	404	435	375	443	426	405	372	517	424	504	534	535	439	421	533	421	404	484	484	364	339	372	454	453
r3-T157_NZ_CP031990.1_pAhaem5227a_A_haemolyticus	442	422	391	461	528	361	311	526	477	351	380	409	435	350	370	485	354	527	380	417	498	405	463	461	439	277	417	403	437	401	347	382	461	425	501	521	521	421	412	520	376	271	494	479	402	374	382	443	463
r3-T89_NZ_CP089040.1_pRIVM_C011601_2_A_ursingii	537	533	507	546	314	512	516	296	555	520	516	517	541	505	459	534	473	289	517	511	563	505	542	541	529	522	512	541	539	557	503	491	545	522	526	353	353	528	541	351	520	503	534	524	513	511	514	525	487
r3-T3_CP062920.1_p4Res13-Abat_c31	456	496	482	7	567	472	446	559	518	450	461	484	498	453	387	504	450	546	457	499	527	501	10	7	473	459	492	494	458	481	458	466	6	484	523	558	557	484	466	555	472	441	508	493	484	494	470	490	492
r3-T84_NZ_CP044491.1_pHZE30-1-8_A_schindleri	423	382	347	447	518	324	227	499	479	311	332	383	422	321	371	476	319	503	328	362	466	354	446	445	412	117	381	403	423	365	324	331	446	410	486	505	506	368	402	504	318	37	465	453	368	342	267	348	436
r3-T26_NZ_MK944321.1_pAVAci147_A_lwoffii	520	492	485	517	552	453	470	536	35	491	484	469	510	480	456	491	424	533	482	498	387	487	514	515	508	476	472	467	519	511	475	489	517	508	511	544	544	480	497	542	481	483	478	486	495	469	463	517	451
r3-T15_NZ_AP019746.1_pARA6_A_radioresistens	414	396	306	471	519	314	300	508	465	359	326	387	419	344	360	446	303	503	327	357	456	318	470	469	423	305	377	380	415	377	345	298	468	412	472	501	502	400	389	500	359	290	453	430	363	304	1	345	438
r3-T24_NZ_CP010356.1_pXBB1-5_A_johnsonii	430	378	351	456	515	331	309	501	480	321	334	374	431	16	383	464	312	490	332	354	466	357	457	456	417	316	400	400	423	397	15	322	457	398	479	511	510	363	370	508	316	325	438	437	382	328	343	404	447
r3-T29_NZ_CP026422.1_pACI-a283_Acinetobacter_sp	448	346	376	492	520	373	407	498	474	379	361	265	437	382	392	460	353	496	360	377	489	399	489	488	443	385	253	429	448	452	388	369	491	425	483	507	509	335	441	507	377	375	461	458	427	381	388	417	440
r3-T109_NZ_CP045105.1_pAJ4132_A_johnsonii	417	340	361	470	517	325	360	501	481	346	330	363	422	330	357	464	321	497	336	220	473	368	471	472	404	363	382	404	413	410	336	327	472	295	487	525	523	321	419	522	359	350	468	460	394	339	356	403	463
r3-T183_NZ_CP044453.1_pMMS9-2-3_A_indicus	430	406	315	477	525	304	367	517	502	348	298	375	428	349	366	461	293	517	296	363	487	304	478	478	418	355	378	381	430	399	348	288	480	407	488	512	511	382	382	509	355	357	446	442	371	294	363	404	440
r3-T101_NZ_CP113451.1_pC9_9_A_baumannii	423	421	268	478	533	322	343	516	481	363	311	374	428	374	362	466	256	517	309	354	478	280	480	481	395	336	385	346	419	416	371	294	478	390	468	511	511	388	407	508	399	324	458	451	340	260	314	400	444
r3-T62_NZ_CP032120.2_pALWED2.5_A_lwoffii	404	388	127	491	523	285	336	514	485	349	273	378	399	353	349	452	165	512	268	338	480	17	488	490	407	360	345	324	399	391	348	284	491	379	479	508	508	392	419	506	351	352	442	439	326	141	314	395	424
r3-T1_NZ_CP044467.1_pHZE23-1-4_A_schindleri	422	365	288	470	525	36	319	494	459	314	194	337	421	331	355	457	264	493	194	308	455	291	471	470	422	321	366	314	420	402	332	243	471	364	458	516	515	369	401	512	331	313	445	440	306	262	313	397	428
r3-T45_NZ_CP094556.1_pYH12068-1_Acinetobacter_sp	526	516	506	560	226	501	516	1	535	514	511	515	537	500	444	529	456	115	511	509	547	523	556	556	534	500	505	537	525	530	502	501	559	519	525	324	326	500	523	324	515	492	516	523	538	501	508	533	474
r3-T107_NZ_CP031995.1_pAhaem2126chc_A_haemolyticus	488	492	487	532	554	469	472	531	334	477	469	467	488	457	417	494	432	523	467	500	307	487	532	532	506	481	467	465	483	511	453	464	533	497	518	528	528	485	484	526	485	478	489	476	497	480	462	507	462
r3-T87_NZ_MF078635.1_pLS535_A_pittii	423	366	334	454	523	313	219	498	461	312	320	383	411	329	367	473	317	507	321	375	457	355	451	450	410	189	383	379	418	369	334	326	455	412	471	511	511	373	413	508	308	171	464	457	368	333	292	354	434
r3-T97_NZ_CP102102.1_p214-3_A_colistiniresistens	414	416	342	488	533	356	373	527	489	382	359	407	444	373	360	471	343	523	357	382	493	345	491	491	421	392	391	377	412	394	375	328	491	393	486	527	526	416	392	525	388	384	452	447	380	341	381	451	435
r3-T99_NZ_CP032273.1_p5_010034_Acinetobacter_sp	410	376	289	455	499	255	324	495	483	324	253	356	428	332	343	466	276	490	250	335	468	285	455	454	416	325	376	318	408	392	328	212	454	387	483	510	512	365	392	511	343	317	444	449	313	278	320	385	440
r3-T154_NZ_CP033119.1_p1_010062_A_wuhouensis	437	434	377	494	540	381	334	545	472	314	378	412	430	383	374	473	365	541	375	405	497	367	494	493	429	356	400	375	430	362	378	396	496	395	485	526	526	410	384	525	335	348	468	463	383	377	394	428	439
r3-T191_NZ_CP101116.1_Z1_plasmid_unnamed1_Acinetobacter_sp	417	378	296	463	514	266	330	509	488	327	262	368	432	332	350	473	284	498	260	334	472	281	464	463	414	330	374	325	412	386	333	218	462	376	479	517	519	368	385	518	348	326	450	449	317	289	328	392	435
r3-T23_NZ_CP035940.1_p5_060092_A_cumulans	456	443	434	510	511	434	459	508	489	449	445	452	408	456	394	266	388	505	442	451	469	425	509	511	446	452	453	471	453	467	455	447	510	436	380	510	512	448	450	510	439	434	248	249	465	428	424	448	449
r3-T25_CP051863.1_pAb-C102_1_c12	535	520	505	555	230	506	513	60	540	509	520	513	532	492	452	527	458	109	520	508	548	520	551	551	545	499	505	534	532	529	495	498	554	507	520	331	333	504	525	331	513	492	514	522	539	507	505	529	472
r3-T163_NZ_CP010352.1_pXBB1-1_A_johnsonii	477	470	472	534	576	474	448	541	381	471	467	459	487	463	433	484	413	553	466	496	126	477	533	534	501	450	466	484	475	478	464	480	532	487	506	559	559	483	512	556	472	458	484	472	494	463	443	485	454
r3-T58_CP034096.1_pA52-4_c73	424	409	311	484	531	300	311	520	488	367	309	391	446	336	371	482	296	507	311	377	488	315	485	484	425	343	394	339	424	394	335	287	485	407	479	523	522	394	395	520	395	332	473	471	308	291	301	424	442
r3-T12_NZ_CP031989.1_pAhaem5227b_A_haemolyticus	429	371	258	459	510	180	322	497	488	317	71	343	433	326	359	458	248	486	73	329	463	273	459	458	428	341	364	326	429	402	327	244	460	367	462	509	508	367	408	505	335	327	452	445	327	241	321	401	438
r3-T149_NZ_CP026413.1_pACI-35f6_Acinetobacter_sp	469	385	303	481	521	282	345	509	470	330	274	348	414	353	395	457	280	510	275	354	488	304	481	480	430	346	369	351	466	409	355	283	478	385	486	511	512	391	408	509	340	344	442	441	352	280	328	388	431
r3-T197_NZ_CP102101.1_p214-2_A_colistiniresistens	447	456	428	491	540	436	421	547	506	425	429	448	406	448	389	485	400	541	427	449	483	422	493	492	440	445	433	436	445	427	450	429	494	434	494	531	533	461	416	531	423	445	480	477	441	424	442	455	467
r3-T201_NZ_CP018873.1_pAHTJS2_A_haemolyticus_rep2	420	444	404	472	534	394	400	521	483	379	404	435	441	370	362	481	375	523	399	411	505	410	474	475	405	401	422	419	419	382	370	377	474	391	485	531	531	445	95	530	391	386	462	454	392	384	391	461	470
r3-T74_CP061706.1_p8E072658_H2787_17845	450	361	390	496	536	364	362	515	478	351	370	221	451	369	388	471	342	526	369	388	468	402	498	497	446	351	265	431	453	431	367	370	497	439	488	517	518	349	432	515	380	350	465	460	417	373	378	417	445
r3-T26_CP026340.1_pAba810CPa_c58	516	491	487	520	554	453	471	534	1	492	486	472	501	483	453	488	433	535	484	503	375	491	517	518	508	470	474	466	515	502	479	483	520	504	515	546	546	476	495	544	478	478	475	486	501	479	464	510	454
r3-T8_NZ_CP090181.1_pDJ-Red_A_johnsonii	470	453	444	506	532	448	487	515	477	455	456	464	421	439	405	164	380	510	452	452	479	444	508	508	473	476	461	484	472	485	441	454	506	436	389	537	536	454	455	536	451	462	5	166	468	429	455	468	458
r3-T34_NZ_CP118894.1_TAC-1_plasmid_unnamed2_Acinetobacter_sp	458	450	420	497	548	419	427	537	500	414	429	434	2	431	402	413	383	534	431	431	485	405	496	497	464	413	439	443	455	440	432	424	497	424	501	530	532	453	425	529	412	416	422	425	446	409	420	431	446
r3-T99_NZ_CP118895.1_TAC-1_plasmid_unnamed3_Acinetobacter_sp	405	375	301	451	506	255	328	497	488	322	249	356	426	330	341	467	273	494	246	332	461	296	448	448	410	330	382	318	403	386	333	221	450	388	473	515	517	364	393	516	344	323	452	441	321	283	317	379	444
r3-T18_NC_010401.1_p1ABAYE_c52	504	493	481	535	540	476	487	535	327	489	477	474	484	482	435	489	436	536	476	499	414	473	531	532	506	486	470	481	502	502	481	468	534	480	522	523	522	496	488	521	491	480	492	483	514	476	464	505	459
r3-T76_NZ_CP044476.1_pHZE33-1-2_A_schindleri	464	460	462	500	535	453	488	531	488	452	457	451	411	458	401	5	398	527	456	468	490	450	502	503	465	464	458	489	460	493	465	456	501	436	406	536	535	459	470	533	470	464	161	155	486	453	446	471	447
r3-T46_CP038259.1_pEH_gr13_c16	546	549	525	563	367	519	528	351	563	527	517	540	551	522	474	541	475	362	516	526	563	529	562	561	546	531	546	547	545	546	521	515	562	540	539	242	238	549	542	239	527	532	539	537	532	519	510	545	471
r3-T77_NZ_CP032138.1_p1_010052_Acinetobacter_sp	519	510	509	541	552	525	516	547	502	523	526	514	531	539	455	526	463	535	523	528	520	516	541	541	493	519	482	529	523	515	536	527	540	523	533	531	531	508	511	530	519	518	509	523	503	516	522	530	471
r3-T170_NZ_CP030758.1_H3_plasmid_unnamed4_A_schindleri	452	406	377	446	513	369	315	512	486	351	375	408	436	366	378	491	358	516	369	397	492	389	449	447	439	205	411	400	449	370	368	370	449	422	503	513	514	397	413	511	350	208	472	473	397	376	389	423	449
r3-T1_CP072307.1_p2KSKSensitive_c42	425	369	287	462	528	29	323	497	459	312	187	339	421	334	355	457	265	497	189	311	455	289	463	462	421	322	369	313	422	401	333	243	463	364	460	518	517	369	404	514	329	314	448	443	314	263	315	396	431
r3-T13_NZ_AFDA02000008.1_pNaval18-8.4_c80	422	365	352	496	520	311	374	512	500	337	334	371	422	354	366	471	319	501	333	25	495	347	499	499	420	370	382	405	414	396	354	318	497	223	469	520	518	361	410	518	354	371	451	449	381	331	360	404	462
r3-T76_NZ_MK978160.1_pAVAci119_A_lwoffii	467	458	461	502	535	453	489	529	487	454	459	453	414	461	404	2	400	527	458	472	488	451	504	505	465	465	459	488	463	494	468	455	503	436	408	536	537	463	471	535	473	465	159	157	487	454	448	472	446
r3-T34_NC_010310.1_pAV2_A_venetianus	456	447	417	499	541	425	429	538	504	422	434	441	33	432	399	413	390	536	435	432	489	411	498	499	466	417	441	448	452	430	434	431	499	427	503	533	535	453	430	532	417	420	414	419	448	415	417	428	446
r3-T25_CP012956.1_pD36-4_c11	537	521	505	554	230	506	513	62	539	509	520	513	532	492	454	527	458	108	520	510	551	520	550	550	546	500	505	535	534	529	495	498	553	509	522	329	331	506	527	329	514	492	515	523	540	507	506	530	474
r3-T6_NZ_CP048663.1_pYH12207-4_A_piscicola	449	460	445	497	534	437	466	528	474	449	430	459	413	450	384	170	382	521	426	460	480	442	498	498	476	448	451	468	451	471	453	442	498	438	385	526	525	473	467	523	457	442	180	127	465	436	433	451	452
r3-T23_CM009033.2_p1ZQ8_c109	458	443	431	499	505	430	458	503	482	446	442	445	407	459	392	262	384	503	439	451	467	426	498	500	447	456	448	473	455	470	457	452	501	433	379	507	508	446	451	506	433	438	244	252	469	425	429	448	448
[truncated: 421 more columns]
